# Supplementary material
Source: publisher figshare collection journal article supplement (https://gsapubs.figshare.com/ndownloader/files/22411650)
Supplement: Supplementary file 1 [file 22411650]

Archive with 12 entries (12 files):
- Supp Item A - Sample locations.pdf
- Supp Item B - Analytical details.pdf
- Supp Item C - Lava Ar-Ar raw data.pdf
- Supp Item D - Lava details and plots.pdf
- Supp Item E - Bentonite raw U-Pbdata.pdf
- Supp Item F - Bentonite ZHe raw data.pdf
- Supp Item G - Bentonite AFT raw data.pdf
- Supp Item H - Sandstone U-Pb raw data.pdf
- Supp Item I - Dike Ar-Ar raw data.pdf
- Supp Item J - Dike plots.pdf
- Supp Item K - Modern river U-Pb raw data.pdf
- Supp Item L - Geochemical data.pdf
