# Supplementary material
Source: publisher figshare collection journal article supplement (https://gsapubs.figshare.com/ndownloader/files/22411650)
Supplement: Supplementary file 1 [file 22411650 › Supp Item A - Sample locations.pdf]

**Data Repository Item A - Sample location information**

| Sample name                                            | Sample location                     | Lat (°N) | Long (°W) | Elevation (meters) |
|--------------------------------------------------------|-------------------------------------|----------|-----------|--------------------|
| <b><i>Colorado Creek lavas</i></b>                     |                                     |          |           |                    |
| 062411JT7                                              | Colorado Creek                      | 63.31595 | 149.73285 | -                  |
| 062411JT6                                              | Colorado Creek                      | 63.31445 | 149.73033 | -                  |
| 062411JT5                                              | Colorado Creek                      | 63.31346 | 149.72993 | -                  |
| 062411JT4                                              | Colorado Creek                      | 63.31253 | 149.73018 | -                  |
| 062411JT3                                              | Colorado Creek                      | 63.29566 | 149.73020 | -                  |
| <b><i>Cantwell Formation bentonites</i></b>            |                                     |          |           |                    |
| East Fork East Bank                                    | East Fork Toklat River              | 63.5745  | 149.8315  | 956                |
| East Fork West Bank                                    | East Fork Toklat River              | 63.5961  | 149.8941  | 849                |
| <i>East Fork West Bank (Pb loss)</i>                   | East Fork Toklat River              | 63.5961  | 149.8941  | 849                |
| Brown Ash                                              | Tattler Creek                       | 63.5806  | 149.6857  | 1461               |
| White Ash                                              | Tattler Creek                       | 63.5806  | 149.6857  | 1464               |
| 01LTC                                                  | Igloo Creek                         | 63.5733  | 149.6343  | 1035               |
| 02LTC                                                  | Igloo Creek                         | 63.5818  | 149.6434  | 1275               |
| 03LTC                                                  | Igloo Creek                         | 63.5857  | 149.6606  | 1504               |
| 03POLY                                                 | Polychrome Mountain                 | 63.5423  | 149.9058  | 1348               |
| 01DOB                                                  | Double Mountain                     | 63.6104  | 149.4858  | 1284               |
| 01DOB (Pb loss)                                        | Double Mountain                     | 63.6104  | 149.4858  | 1284               |
| 03DOB                                                  | Double Mountain                     | 63.6088  | 149.4820  | 1434               |
| 04DOB                                                  | Double Mountain                     | 63.6081  | 149.4819  | 1450               |
| 05DOB                                                  | Double Mountain                     | 63.6076  | 149.4816  | 1480               |
| <b><i>Colorado Creek sandstones</i></b>                |                                     |          |           |                    |
| 062411JT1                                              | Colorado Creek                      | 63.3067  | 149.7329  | -                  |
| 062411JT8 (igneous clast)                              | Colorado Creek                      | 63.3066  | 149.7318  | -                  |
| 062411JT9                                              | Colorado Creek                      | 63.3067  | 149.7302  | -                  |
| 062411JT11                                             | Colorado Creek                      | 63.3081  | 149.7239  | -                  |
| <b><i>Mafic dikes near Denali Fault</i></b>            |                                     |          |           |                    |
| 28CHED WR#L1                                           | Foraker Glacier                     | 63.0514  | 151.3755  | 2253               |
| 02PETER WR#L1                                          | Peter's Glacier                     | 63.1677  | 151.1632  | 2472               |
| 24PETER WR#L1                                          | Peter's Glacier                     | 63.2052  | 150.9168  | 1519               |
| 25PETER WR#L1                                          | Peter's Glacier                     | 63.2056  | 150.9151  | 1529               |
| 30PETER WR#L1                                          | Peter's Glacier                     | 63.2361  | 150.7383  | 2002               |
| 55NEN WR#L1                                            | Nenana Glacier                      | 63.5104  | 147.7665  | 1369               |
| 02BAL WR#L1                                            | Mount Balchan                       | 63.6169  | 146.8887  | 2273               |
| 07BAL WR#L1                                            | Mount Balchan                       | 63.6201  | 146.9245  | 2092               |
| 28BAL WR#L1                                            | Mount Balchan                       | 63.6139  | 146.8696  | 2693               |
| 10910DIKE WR#L1                                        | Peak east of Mount Balchan          | 63.6110  | 146.7878  | 2825               |
| JB09MUD                                                | Muldrow Glacier                     | 63.2054  | 150.8519  | -                  |
| JB10MUD                                                | Muldrow Glacier                     | 63.2092  | 150.8382  | -                  |
| JB15AMUD                                               | Muldrow Glacier                     | 63.2436  | 150.6471  | -                  |
| JBAUG                                                  | Augustana Pass                      | 63.4349  | 145.9843  | -                  |
| <b><i>Related, previously dated volcanic rocks</i></b> |                                     |          |           |                    |
| Sugarloaf volcano rhyolite                             | Sugarloaf Mountain                  | 63.7517  | 148.7900  | 1117               |
| 05RN269A dacite                                        |                                     | 64.0000  | 148.5702  | 970                |
| <b><i>Modern detrital sand</i></b>                     |                                     |          |           |                    |
| 01TEK                                                  | Teklanika River at Park Road Bridge | 63.6357  | 149.5611  | 820                |
| Susitna Glacier                                        | Susitna Glacier terminus            | 63.4191  | 147.2222  | 818                |
| West Fork Glacier                                      | West Fork Glacier terminus          | 63.3496  | 147.5224  | 805                |

*Note:* datum WGS84 for all samples
