# Supplementary material
Source: publisher figshare collection journal article supplement (https://gsapubs.figshare.com/ndownloader/files/22411650)
Supplement: Supplementary file 1 [file 22411650 › Supp Item C - Lava Ar-Ar raw data.pdf]

Data Repository Item C –  $^{40}\text{Ar}/^{39}\text{Ar}$  analytical results from Colorado Creek volcanic rocks

062411JT03 BI#L1

Weighted average of J from standards =  $8.990\text{e-}05 \pm 4.481\text{e-}07$

| Laser Power<br>(mW) | Cumulative<br>$^{39}\text{Ar}$ | $^{40}\text{Ar}/^{39}\text{Ar}$<br>meas. | +/-      | $^{37}\text{Ar}/^{39}\text{Ar}$<br>meas. | +/-     | $^{36}\text{Ar}/^{39}\text{Ar}$<br>meas. | +/-     | % Atm.<br>$^{40}\text{Ar}$ | +/-     | Ca/K     | +/-     | Cl/K    | +/-     | $^{40}\text{Ar}/^{39}\text{K}$ | +/-      | Age<br>(Ma) | +/-<br>(Ma) |
|---------------------|--------------------------------|------------------------------------------|----------|------------------------------------------|---------|------------------------------------------|---------|----------------------------|---------|----------|---------|---------|---------|--------------------------------|----------|-------------|-------------|
| 500                 | 0.0139                         | 479.73093                                | 93.17582 | 0.84597                                  | 0.55399 | 0.88946                                  | 0.19745 | 54.77671                   | 5.89288 | 1.55317  | 1.01772 | 0.01492 | 0.03666 | 217.06639                      | 50.80235 | 34.83       | 8.07        |
| 1000                | 0.0508                         | 503.51346                                | 20.4908  | 3.83916                                  | 0.22008 | 0.46616                                  | 0.07105 | 27.29676                   | 4.01915 | 7.06349  | 0.40602 | 0.00771 | 0.0089  | 367.04422                      | 25.227   | 58.5        | 3.96        |
| 1500                | 0.0923                         | 591.49384                                | 33.10366 | 10.34551                                 | 0.60508 | 0.46156                                  | 0.04549 | 22.91588                   | 1.871   | 19.1223  | 1.12664 | 0.00553 | 0.00954 | 459.28066                      | 28.19604 | 72.91       | 4.39        |
| 2000                | 0.1335                         | 535.31807                                | 27.86503 | 0.20173                                  | 0.16151 | 0.13042                                  | 0.03243 | 7.19655                    | 1.75086 | 0.37021  | 0.29643 | 0.02399 | 0.00708 | 496.83683                      | 27.51805 | 78.75       | 4.27        |
| 3000                | 0.2255                         | 492.83051                                | 13.81541 | 0.09322                                  | 0.08333 | 0.08734                                  | 0.018   | 5.23563                    | 1.06937 | 0.17107  | 0.15292 | 0.01077 | 0.00393 | 467.03032                      | 14.11841 | 74.12       | 2.2         |
| 5000                | 0.4727                         | 451.46091                                | 3.89378  | 0.04543                                  | 0.02304 | 0.03527                                  | 0.00846 | 2.30793                    | 0.55368 | 0.08336  | 0.04228 | 0.0098  | 0.00166 | 441.02666                      | 4.55682  | 70.07       | 0.71        |
| 9000                | 1                              | 439.88871                                | 5.33466  | -0.00744                                 | 0.01042 | 0.01807                                  | 0.00321 | 1.21403                    | 0.21541 | -0.01365 | 0.01913 | 0.00841 | 0.00081 | 434.51671                      | 5.35615  | 69.05       | 0.84        |
| Integrated          |                                | 460.79183                                | 3.89747  | 0.61063                                  | 0.01824 | 0.08053                                  | 0.00476 | 5.1538                     | 0.30257 | 1.12091  | 0.03349 | 0.00956 | 0.00104 | 437.20392                      | 3.95764  | 69.47       | 0.7         |

062411JT04 WR#L1

Weighted average of J from standards =  $8.990\text{e-}05 \pm 4.481\text{e-}07$

| Laser Power<br>(mW) | Cumulative<br>$^{39}\text{Ar}$ | $^{40}\text{Ar}/^{39}\text{Ar}$<br>meas. | +/-      | $^{37}\text{Ar}/^{39}\text{Ar}$<br>meas. | +/-     | $^{36}\text{Ar}/^{39}\text{Ar}$<br>meas. | +/-     | % Atm.<br>$^{40}\text{Ar}$ | +/-     | Ca/K     | +/-     | Cl/K     | +/-     | $^{40}\text{Ar}/^{39}\text{K}$ | +/-      | Age<br>(Ma) | +/-<br>(Ma) |
|---------------------|--------------------------------|------------------------------------------|----------|------------------------------------------|---------|------------------------------------------|---------|----------------------------|---------|----------|---------|----------|---------|--------------------------------|----------|-------------|-------------|
| 500                 | 0.0044                         | 1450.89796                               | 259.8064 | 1.89377                                  | 0.62261 | 4.63442                                  | 0.85065 | 94.37892                   | 3.81187 | 3.47946  | 1.14546 | -0.00347 | 0.03769 | 81.66371                       | 57.28834 | 13.18       | 9.21        |
| 1000                | 0.017                          | 1027.94071                               | 85.65526 | 2.78752                                  | 0.29288 | 2.59623                                  | 0.22525 | 74.61306                   | 1.81565 | 5.1248   | 0.53952 | 0.01351  | 0.01572 | 261.46987                      | 28.77468 | 41.87       | 4.55        |
| 1500                | 0.0409                         | 622.01938                                | 31.84383 | 4.25083                                  | 0.2504  | 0.90611                                  | 0.05549 | 42.99188                   | 1.45127 | 7.82317  | 0.46221 | -0.0031  | 0.00661 | 355.65235                      | 20.40255 | 56.72       | 3.2         |
| 2000                | 0.0687                         | 597.44525                                | 14.8097  | 5.67667                                  | 0.17138 | 0.64056                                  | 0.02212 | 31.60585                   | 0.76801 | 10.45784 | 0.31699 | 0.00379  | 0.00583 | 410.24203                      | 11.23517 | 65.27       | 1.76        |
| 3000                | 0.2051                         | 490.95889                                | 3.18661  | 2.34209                                  | 0.04039 | 0.20279                                  | 0.00665 | 12.16693                   | 0.39376 | 4.30452  | 0.07435 | -0.00039 | 0.00142 | 431.91259                      | 3.43965  | 68.65       | 0.54        |
| 5000                | 0.7615                         | 439.29995                                | 2.97664  | 0.20592                                  | 0.00778 | 0.02854                                  | 0.00261 | 1.9159                     | 0.17522 | 0.37789  | 0.01427 | 0.00147  | 0.00049 | 430.91693                      | 3.02454  | 68.49       | 0.47        |
| 9000                | 1                              | 439.28453                                | 4.32021  | 0.3654                                   | 0.01386 | 0.06076                                  | 0.00302 | 4.08042                    | 0.1992  | 0.67064  | 0.02545 | 0.00693  | 0.001   | 421.44015                      | 4.24326  | 67.01       | 0.66        |
| Integrated          |                                | 467.01351                                | 2.29041  | 0.82545                                  | 0.00986 | 0.15075                                  | 0.00244 | 9.52448                    | 0.14762 | 1.51547  | 0.01811 | 0.0026   | 0.00053 | 422.75251                      | 2.19703  | 67.22       | 0.48        |

062411JT05 BI#L1

Weighted average of J from standards =  $8.990\text{e-}05 \pm 4.481\text{e-}07$

| Laser Power<br>(mW) | Cumulative<br>$^{39}\text{Ar}$ | $^{40}\text{Ar}/^{39}\text{Ar}$<br>meas. | +/-      | $^{37}\text{Ar}/^{39}\text{Ar}$<br>meas. | +/-     | $^{36}\text{Ar}/^{39}\text{Ar}$<br>meas. | +/-     | % Atm.<br>$^{40}\text{Ar}$ | +/-     | Ca/K     | +/-     | Cl/K     | +/-     | $^{40}\text{Ar}/^{39}\text{K}$ | +/-      | Age<br>(Ma) | +/-<br>(Ma) |
|---------------------|--------------------------------|------------------------------------------|----------|------------------------------------------|---------|------------------------------------------|---------|----------------------------|---------|----------|---------|----------|---------|--------------------------------|----------|-------------|-------------|
| 500                 | 0.006                          | 578.57493                                | 71.23517 | -0.1893                                  | 0.37614 | 0.98966                                  | 0.20838 | 50.55089                   | 8.6382  | -0.34728 | 0.68999 | 0.01489  | 0.03198 | 286.04723                      | 61.15317 | 45.76       | 9.66        |
| 1000                | 0.0191                         | 584.20585                                | 52.04798 | -0.25427                                 | 0.14635 | 0.37588                                  | 0.07276 | 19.01709                   | 3.26772 | -0.46646 | 0.26844 | 0.00158  | 0.01535 | 472.9979                       | 46.26094 | 75.04       | 7.19        |
| 1500                | 0.0348                         | 571.26276                                | 38.28957 | 0.06604                                  | 0.12142 | 0.52291                                  | 0.05098 | 27.04919                   | 1.91785 | 0.12117  | 0.22281 | 0.01002  | 0.01145 | 416.73856                      | 30.0226  | 66.28       | 4.69        |
| 2000                | 0.056                          | 588.02223                                | 22.24777 | -0.07165                                 | 0.11156 | 0.42029                                  | 0.04594 | 21.12296                   | 2.16694 | -0.13145 | 0.20468 | -0.00058 | 0.00724 | 463.76763                      | 21.69561 | 73.61       | 3.37        |
| 3000                | 0.111                          | 497.67044                                | 10.66083 | -0.05442                                 | 0.03428 | 0.12589                                  | 0.01306 | 7.47625                    | 0.75904 | -0.09985 | 0.0629  | 0.00378  | 0.00268 | 460.41818                      | 10.56748 | 73.09       | 1.64        |
| 5000                | 0.2771                         | 468.01241                                | 4.60586  | 0.03743                                  | 0.01508 | 0.0307                                   | 0.00358 | 1.93809                    | 0.22545 | 0.06867  | 0.02767 | 0.00509  | 0.00109 | 458.92493                      | 4.64181  | 72.86       | 0.72        |
| 9000                | 1                              | 447.78406                                | 5.44531  | 0.12078                                  | 0.02813 | 0.02286                                  | 0.00714 | 1.50644                    | 0.47095 | 0.22163  | 0.05163 | 0.0097   | 0.00183 | 441.04684                      | 5.76675  | 70.07       | 0.9         |
| Integrated          |                                | 461.3747                                 | 4.24945  | 0.0856                                   | 0.021   | 0.05657                                  | 0.00554 | 3.62186                    | 0.35311 | 0.15706  | 0.03853 | 0.00832  | 0.00139 | 444.66262                      | 4.41299  | 70.64       | 0.77        |

062411JT06 WR#L1

Weighted average of J from standards = 8.990e-05 +/- 4.481e-07

| Laser Power<br>(mW) | Cumulative<br><sup>39</sup> Ar | <sup>40</sup> Ar/ <sup>39</sup> Ar<br>meas. | +/-      | <sup>37</sup> Ar/ <sup>39</sup> Ar<br>meas. | +/-     | <sup>36</sup> Ar/ <sup>39</sup> Ar<br>meas. | +/-     | % Atm.<br><sup>40</sup> Ar | +/-      | Ca/K     | +/-      | Cl/K     | +/-     | <sup>40</sup> * / <sup>39</sup> K | +/-       | Age<br>(Ma) | +/-<br>(Ma) |
|---------------------|--------------------------------|---------------------------------------------|----------|---------------------------------------------|---------|---------------------------------------------|---------|----------------------------|----------|----------|----------|----------|---------|-----------------------------------|-----------|-------------|-------------|
| 500                 | 0.0063                         | 1284.86076                                  | 199.1173 | 3.8777                                      | 0.77541 | 3.99804                                     | 0.64356 | 91.92653                   | 4.0227   | 7.13458  | 1.43059  | -0.01929 | 0.03081 | 104.01526                         | 54.31242  | 16.77       | 8.72        |
| 1000                | 0.0127                         | 1580.11836                                  | 1001.28  | 13.51018                                    | 9.50183 | 4.75454                                     | 3.08486 | 88.84641                   | 12.40037 | 25.02811 | 17.77206 | -0.27698 | 0.3222  | 177.9344                          | 228.26138 | 28.6        | 36.4        |
| 1500                | 0.0433                         | 595.26999                                   | 15.76769 | 3.42115                                     | 0.1626  | 1.02375                                     | 0.04426 | 50.77545                   | 1.74     | 6.29254  | 0.29979  | 0.03618  | 0.00551 | 293.71405                         | 13.00262  | 46.97       | 2.05        |
| 2000                | 0.1023                         | 532.2953                                    | 10.99212 | 4.88988                                     | 0.1518  | 0.37464                                     | 0.01329 | 20.72319                   | 0.60289  | 9.00336  | 0.28046  | 0.00402  | 0.00272 | 423.42546                         | 9.36778   | 67.32       | 1.46        |
| 3000                | 0.2052                         | 511.72014                                   | 9.9636   | 6.74448                                     | 0.14507 | 0.23264                                     | 0.01124 | 13.32643                   | 0.59568  | 12.43442 | 0.26874  | -0.00134 | 0.00162 | 445.62301                         | 9.25671   | 70.79       | 1.44        |
| 5000                | 0.6516                         | 439.7389                                    | 2.78714  | 1.27435                                     | 0.01778 | 0.03268                                     | 0.00265 | 2.17256                    | 0.17775  | 2.34037  | 0.03267  | 0.00615  | 0.00065 | 430.54375                         | 2.84674   | 68.44       | 0.44        |
| 9000                | 1                              | 437.46703                                   | 3.08962  | 0.75658                                     | 0.01788 | 0.04646                                     | 0.00269 | 3.12402                    | 0.18073  | 1.38897  | 0.03285  | 0.01442  | 0.00067 | 423.99828                         | 3.10535   | 67.41       | 0.48        |
| Integrated          |                                | 469.30074                                   | 2.88023  | 2.0334                                      | 0.03248 | 0.16416                                     | 0.00503 | 10.30135                   | 0.31084  | 3.73638  | 0.05977  | 0.00709  | 0.0018  | 421.53516                         | 2.98213   | 67.03       | 0.57        |
