# Supplementary material
Source: publisher figshare collection journal article supplement (https://gsapubs.figshare.com/ndownloader/files/22411650)
Supplement: Supplementary file 1 [file 22411650 › Supp Item E - Bentonite raw U-Pbdata.pdf]

## Data Repository Item E - U-Pb zircon analytical results from Cantwell Formation bentonites

| Mineral                  |  | Zrn                 |            |      |                    |                    |                     |                   |                    |         |         |                                   |         |         |                     |         |         |                    |         |         |          |                        |             |                                |    |    |  |  |  |  |  |               |  |  |  |  |  |  |  |  |  |
|--------------------------|--|---------------------|------------|------|--------------------|--------------------|---------------------|-------------------|--------------------|---------|---------|-----------------------------------|---------|---------|---------------------|---------|---------|--------------------|---------|---------|----------|------------------------|-------------|--------------------------------|----|----|--|--|--|--|--|---------------|--|--|--|--|--|--|--|--|--|
| Sample Name              |  | 021TC               |            |      |                    |                    |                     |                   |                    |         |         |                                   |         |         |                     |         |         |                    |         |         |          |                        |             |                                |    |    |  |  |  |  |  |               |  |  |  |  |  |  |  |  |  |
| AZZ Name                 |  | 1413-06             |            |      |                    |                    |                     |                   |                    |         |         |                                   |         |         |                     |         |         |                    |         |         |          |                        |             |                                |    |    |  |  |  |  |  |               |  |  |  |  |  |  |  |  |  |
|                          |  | Uranium and Thorium |            |      |                    |                    |                     |                   |                    |         |         | Concordant Scans: Isotopic Ratios |         |         |                     |         |         |                    |         |         |          | Concordant Scans: Ages |             |                                |    |    |  |  |  |  |  | Preferred Age |  |  |  |  |  |  |  |  |  |
| Analysis Name            |  | [U] (ppm)           | [Th] (ppm) | U/Th | 207Pb/235U 2-sigma | 206Pb/238U 2-sigma | 207Pb/206Pb 2-sigma | Error Correlation | 207Pb/235U 2-sigma | 2-sigma | 2-sigma | 206Pb/238U 2-sigma                | 2-sigma | 2-sigma | 207Pb/206Pb 2-sigma | 2-sigma | 2-sigma | Preferred Age (Ma) | 2-sigma | 2-sigma | Age Type | Concordant             | Total Scans |                                |    |    |  |  |  |  |  |               |  |  |  |  |  |  |  |  |  |
| P1413_006_Zrn_A_1_MBD_0  |  | 1016                | 152        | 6.70 | 0.07646            | 0.02101            | 0.01063             | 0.00071           | 0.05216            | 0.01404 | 0.20    | 74.81                             | 19.92   | 19.72   | 68.18               | 4.54    | 4.54    | 292.29             | 584.58  | 562.67  | 68.18    | 4.54                   | 4.54        | 206Pb/238U concordant scans    | 17 | 31 |  |  |  |  |  |               |  |  |  |  |  |  |  |  |  |
| P1413_006_Zrn_A_1_MBD_1  |  | 287                 | 88         | 3.26 | 0.06613            | 0.01340            | 0.01011             | 0.00047           | 0.04743            | 0.00962 | 0.11    | 65.02                             | 12.80   | 12.72   | 64.85               | 2.99    | 2.99    | 71.15              | 142.31  | 449.81  | 64.85    | 2.99                   | 2.99        | 206Pb/238U concordant scans    | 13 | 31 |  |  |  |  |  |               |  |  |  |  |  |  |  |  |  |
| P1413_006_Zrn_A_1_MBD_2  |  | 323                 | 82         | 3.94 | 0.07184            | 0.01354            | 0.01037             | 0.00045           | 0.05040            | 0.00949 | 0.10    | 70.45                             | 12.87   | 12.79   | 66.51               | 2.87    | 2.87    | 206.04             | 412.09  | 410.97  | 66.51    | 2.87                   | 2.87        | 206Pb/238U concordant scans    | 16 | 31 |  |  |  |  |  |               |  |  |  |  |  |  |  |  |  |
| P1413_006_Zrn_A_1_MBD_3  |  | 186                 | 43         | 4.36 | 0.07835            | 0.01463            | 0.01100             | 0.00049           | 0.05005            | 0.00976 | 0.06    | 76.59                             | 13.82   | 13.73   | 70.54               | 3.11    | 3.11    | 269.89             | 465.11  | 406.76  | 70.54    | 3.11                   | 3.11        | 206Pb/238U concordant scans    | 16 | 31 |  |  |  |  |  |               |  |  |  |  |  |  |  |  |  |
| P1413_006_Zrn_A_1_MBD_4  |  | 0                   | 0          | 0.00 | 0.00000            | 0.00000            | 0.00000             | 0.00000           | 0.00000            | 0.00000 | 0.00    | 0.00                              | 0.00    | 0.00    | 0.00                | 0.00    | 0.00    | 0.00               | 0.00    | 0.00    | failed   | 0                      | 0           |                                |    |    |  |  |  |  |  |               |  |  |  |  |  |  |  |  |  |
| P1413_006_Zrn_A_1_MBD_5  |  | 390                 | 284        | 1.37 | 0.07148            | 0.01768            | 0.01136             | 0.00039           | 0.04563            | 0.01132 | 0.05    | 70.10                             | 16.83   | 16.69   | 72.82               | 2.48    | 2.48    | 0.00               | 0.00    | 507.89  | 0.00     | 0.00                   | 0.00        | Pbc-corrected concordant scans | 12 | 31 |  |  |  |  |  |               |  |  |  |  |  |  |  |  |  |
| P1413_006_Zrn_A_1_MBD_6  |  | 379                 | 206        | 1.84 | 0.07878            | 0.01269            | 0.01072             | 0.00046           | 0.05331            | 0.00868 | 0.08    | 77.00                             | 11.98   | 11.91   | 68.73               | 2.91    | 2.91    | 341.96             | 391.18  | 348.90  | 68.73    | 2.91                   | 2.91        | 206Pb/238U concordant scans    | 16 | 31 |  |  |  |  |  |               |  |  |  |  |  |  |  |  |  |
| P1413_006_Zrn_A_1_MBD_7  |  | 501                 | 198        | 2.53 | 0.07829            | 0.00985            | 0.01082             | 0.00035           | 0.05250            | 0.00668 | 0.07    | 76.54                             | 9.29    | 9.25    | 69.34               | 2.21    | 2.21    | 307.34             | 303.73  | 277.67  | 69.34    | 2.21                   | 2.21        | 206Pb/238U concordant scans    | 27 | 31 |  |  |  |  |  |               |  |  |  |  |  |  |  |  |  |
| P1413_006_Zrn_A_1_MBD_8  |  | 327                 | 214        | 1.53 | 0.07023            | 0.00816            | 0.01045             | 0.00044           | 0.04873            | 0.00583 | 0.08    | 68.91                             | 7.76    | 7.73    | 67.03               | 2.79    | 2.79    | 134.96             | 269.92  | 269.82  | 67.03    | 2.79                   | 2.79        | 206Pb/238U concordant scans    | 19 | 31 |  |  |  |  |  |               |  |  |  |  |  |  |  |  |  |
| P1413_006_Zrn_A_1_MBD_9  |  | 341                 | 151        | 2.25 | 0.08150            | 0.01170            | 0.01173             | 0.00034           | 0.05040            | 0.00726 | 0.07    | 79.55                             | 11.01   | 10.95   | 75.16               | 2.17    | 2.17    | 213.45             | 352.00  | 317.66  | 75.16    | 2.17                   | 2.17        | 206Pb/238U concordant scans    | 21 | 31 |  |  |  |  |  |               |  |  |  |  |  |  |  |  |  |
| P1413_006_Zrn_A_1_MBD_10 |  | 180                 | 44         | 4.07 | 0.07281            | 0.01908            | 0.01044             | 0.00054           | 0.05061            | 0.01343 | 0.03    | 71.37                             | 18.14   | 17.98   | 66.92               | 3.42    | 3.42    | 223.04             | 446.08  | 561.79  | 66.92    | 3.42                   | 3.42        | 206Pb/238U concordant scans    | 17 | 31 |  |  |  |  |  |               |  |  |  |  |  |  |  |  |  |
| P1413_006_Zrn_A_1_MBD_11 |  | 1486                | 1121       | 1.33 | 0.06657            | 0.00377            | 0.00989             | 0.00023           | 0.04884            | 0.00276 | 0.19    | 65.44                             | 3.59    | 3.59    | 63.42               | 1.48    | 1.48    | 140.02             | 135.22  | 129.86  | 63.42    | 1.48                   | 1.48        | 206Pb/238U concordant scans    | 21 | 31 |  |  |  |  |  |               |  |  |  |  |  |  |  |  |  |
| P1413_006_Zrn_A_1_MBD_12 |  | 447                 | 183        | 2.44 | 0.07197            | 0.01245            | 0.01070             | 0.00059           | 0.04879            | 0.00869 | 0.06    | 70.56                             | 11.82   | 11.75   | 68.59               | 3.74    | 3.74    | 137.92             | 275.84  | 393.54  | 68.59    | 3.74                   | 3.74        | 206Pb/238U concordant scans    | 14 | 31 |  |  |  |  |  |               |  |  |  |  |  |  |  |  |  |
| P1413_006_Zrn_A_1_MBD_13 |  | 489                 | 159        | 3.08 | 0.07501            | 0.00691            | 0.01097             | 0.00044           | 0.04958            | 0.00475 | 0.11    | 73.44                             | 6.54    | 6.52    | 70.35               | 2.80    | 2.80    | 175.35             | 231.42  | 216.11  | 70.35    | 2.80                   | 2.80        | 206Pb/238U concordant scans    | 14 | 31 |  |  |  |  |  |               |  |  |  |  |  |  |  |  |  |
| P1413_006_Zrn_A_1_MBD_14 |  | 2104                | 848        | 2.48 | 0.06778            | 0.00466            | 0.01071             | 0.00036           | 0.04592            | 0.00304 | 0.31    | 66.59                             | 4.44    | 4.43    | 68.64               | 2.27    | 2.27    | 0.00               | 0.00    | 142.98  | 0.00     | 0.00                   | 0.00        | Pbc-corrected concordant scans | 23 | 31 |  |  |  |  |  |               |  |  |  |  |  |  |  |  |  |
| P1413_006_Zrn_A_1_MBD_15 |  | 352                 | 152        | 2.31 | 0.07106            | 0.01031            | 0.01042             | 0.00045           | 0.04946            | 0.00727 | 0.10    | 69.70                             | 9.80    | 9.76    | 66.83               | 2.85    | 2.85    | 169.56             | 339.11  | 326.20  | 66.83    | 2.85                   | 2.85        | 206Pb/238U concordant scans    | 14 | 31 |  |  |  |  |  |               |  |  |  |  |  |  |  |  |  |
| P1413_006_Zrn_A_1_MBD_16 |  | 298                 | 61         | 4.89 | 0.07519            | 0.01769            | 0.01022             | 0.00077           | 0.05334            | 0.01285 | 0.08    | 73.62                             | 16.78   | 16.64   | 65.57               | 4.94    | 4.94    | 343.49             | 596.71  | 503.54  | 65.57    | 4.94                   | 4.94        | 206Pb/238U concordant scans    | 13 | 31 |  |  |  |  |  |               |  |  |  |  |  |  |  |  |  |
| P1413_006_Zrn_A_1_MBD_17 |  | 684                 | 370        | 1.85 | 0.07252            | 0.00722            | 0.01033             | 0.00054           | 0.05092            | 0.00518 | 0.21    | 71.09                             | 6.85    | 6.83    | 66.25               | 3.44    | 3.43    | 236.99             | 243.35  | 226.41  | 66.25    | 3.44                   | 3.43        | 206Pb/238U concordant scans    | 13 | 31 |  |  |  |  |  |               |  |  |  |  |  |  |  |  |  |
| P1413_006_Zrn_A_1_MBD_18 |  | 0                   | 0          | 0.00 | 0.00000            | 0.00000            | 0.00000             | 0.00000           | 0.00000            | 0.00000 | 0.00    | 0.00                              | 0.00    | 0.00    | 0.00                | 0.00    | 0.00    | 0.00               | 0.00    | 0.00    | failed   | 0                      | 0           |                                |    |    |  |  |  |  |  |               |  |  |  |  |  |  |  |  |  |
| P1413_006_Zrn_A_1_MBD_19 |  | 444                 | 104        | 4.26 | 0.07458            | 0.00814            | 0.01069             | 0.00055           | 0.05059            | 0.00570 | 0.16    | 73.04                             | 7.71    | 7.68    | 68.56               | 3.48    | 3.48    | 222.19             | 271.38  | 250.49  | 68.56    | 3.48                   | 3.48        | 206Pb/238U concordant scans    | 23 | 31 |  |  |  |  |  |               |  |  |  |  |  |  |  |  |  |
| P1413_006_Zrn_A_1_MBD_20 |  | 404                 | 105        | 3.84 | 0.07457            | 0.01231            | 0.01129             | 0.00044           | 0.04790            | 0.00790 | 0.12    | 73.03                             | 11.67   | 11.60   | 72.38               | 2.78    | 2.79    | 94.21              | 188.42  | 368.97  | 72.38    | 2.78                   | 2.79        | 206Pb/238U concordant scans    | 22 | 31 |  |  |  |  |  |               |  |  |  |  |  |  |  |  |  |
| P1413_006_Zrn_A_1_MBD_21 |  | 294                 | 77         | 3.84 | 0.07637            | 0.01327            | 0.01091             | 0.00067           | 0.05070            | 0.00887 | 0.16    | 74.72                             | 12.56   | 12.48   | 69.95               | 4.29    | 4.29    | 230.28             | 430.41  | 380.10  | 69.95    | 4.29                   | 4.29        | 206Pb/238U concordant scans    | 9  | 31 |  |  |  |  |  |               |  |  |  |  |  |  |  |  |  |
| P1413_006_Zrn_A_1_MBD_22 |  | 305                 | 102        | 2.98 | 0.07523            | 0.01048            | 0.01141             | 0.00054           | 0.04788            | 0.00656 | 0.21    | 73.65                             | 9.92    | 9.87    | 73.16               | 3.46    | 3.46    | 89.55              | 179.10  | 310.16  | 73.16    | 3.46                   | 3.46        | 206Pb/238U concordant scans    | 20 | 31 |  |  |  |  |  |               |  |  |  |  |  |  |  |  |  |
| P1413_006_Zrn_A_1_MBD_23 |  | 0                   | 0          | 0.00 | 0.00000            | 0.00000            | 0.00000             | 0.00000           | 0.00000            | 0.00000 | 0.00    | 0.00                              | 0.00    | 0.00    | 0.00                | 0.00    | 0.00    | 0.00               | 0.00    | 0.00    | failed   | 0                      | 0           |                                |    |    |  |  |  |  |  |               |  |  |  |  |  |  |  |  |  |
| P1413_006_Zrn_A_1_MBD_24 |  | 246                 | 43         | 5.76 | 0.07276            | 0.01417            | 0.01024             | 0.00056           | 0.05152            | 0.01009 | 0.12    | 71.32                             | 13.46   | 13.37   | 65.70               | 3.60    | 3.60    | 264.06             | 483.84  | 421.03  | 65.70    | 3.60                   | 3.60        | 206Pb/238U concordant scans    | 16 | 31 |  |  |  |  |  |               |  |  |  |  |  |  |  |  |  |
| P1413_006_Zrn_A_1_MBD_25 |  | 670                 | 463        | 1.45 | 0.07542            | 0.00524            | 0.01076             | 0.00029           | 0.05083            | 0.00346 | 0.23    | 73.83                             | 4.95    | 4.94    | 69.00               | 1.87    | 1.87    | 233.18             | 160.89  | 153.31  | 69.00    | 1.87                   | 1.87        | 206Pb/238U concordant scans    | 24 | 31 |  |  |  |  |  |               |  |  |  |  |  |  |  |  |  |
| P1413_006_Zrn_A_1_MBD_26 |  | 282                 | 80         | 3.52 | 0.08098            | 0.01605            | 0.01061             | 0.00078           | 0.05533            | 0.01101 | 0.17    | 79.06                             | 15.13   | 15.02   | 68.06               | 4.99    | 4.99    | 425.62             | 477.70  | 415.81  | 68.06    | 4.99                   | 4.99        | 206Pb/238U concordant scans    | 14 | 31 |  |  |  |  |  |               |  |  |  |  |  |  |  |  |  |
| P1413_006_Zrn_A_1_MBD_27 |  | 324                 | 97         | 3.35 | 0.06664            | 0.02784            | 0.01153             | 0.00071           | 0.06079            | 0.01764 | 0.07    | 93.67                             | 25.94   | 25.61   | 73.90               | 4.52    | 4.52    | 631.71             | 695.53  | 570.17  | 73.90    | 4.52                   | 4.52        | 206Pb/238U concordant scans    | 7  | 31 |  |  |  |  |  |               |  |  |  |  |  |  |  |  |  |
| P1413_006_Zrn_A_1_MBD_28 |  | 362                 | 112        | 3.22 | 0.07690            | 0.02042            | 0.01090             | 0.00057           | 0.05119            | 0.01355 | 0.11    | 75.23                             | 19.35   | 19.16   | 69.86               | 3.65    | 3.65    | 249.31             | 498.62  | 558.21  | 69.86    | 3.65                   | 3.65        | 206Pb/238U concordant scans    | 14 | 31 |  |  |  |  |  |               |  |  |  |  |  |  |  |  |  |
| P1413_006_Zrn_A_1_MBD_29 |  | 445                 | 152        | 2.93 | 0.07082            | 0.01146            | 0.01049             | 0.00039           | 0.04896            | 0.00798 | 0.08    | 69.48                             | 10.90   | 10.84   | 67.28               | 2.51    | 2.51    | 145.91             | 291.82  | 361.39  | 67.28    | 2.51                   | 2.51        | 206Pb/238U concordant scans    | 22 | 31 |  |  |  |  |  |               |  |  |  |  |  |  |  |  |  |
| P1413_006_Zrn_A_1_MBD_30 |  | 0                   | 0          | 0.00 | 0.00000            | 0.00000            | 0.00000             | 0.00000           | 0.00000            | 0.00000 | 0.00    | 0.00                              | 0.00    | 0.00    | 0.00                | 0.00    | 0.00    | 0.00               | 0.00    | 0.00    | failed   | 0                      | 0           |                                |    |    |  |  |  |  |  |               |  |  |  |  |  |  |  |  |  |
| P1413_006_Zrn_A_1_MBD_31 |  | 0                   | 0          | 0.00 | 0.00000            | 0.00000            | 0.00000             | 0.00000           | 0.00000            | 0.00000 | 0.00    | 0.00                              | 0.00    | 0.00    | 0.00                | 0.00    | 0.00    | 0.00               | 0.00    | 0.00    | failed   | 0                      | 0           |                                |    |    |  |  |  |  |  |               |  |  |  |  |  |  |  |  |  |
| P1413_006_Zrn_A_1_MBD_32 |  | 233                 | 60         | 3.88 | 0.07593            | 0.01749            | 0.01064             | 0.00053           | 0.05173            | 0.01202 | 0.06    | 74.31                             | 16.58   | 16.44   | 68.26               | 3.39    | 3.38    | 273.71             | 547.41  | 492.68  | 68.26    | 3.39                   | 3.38        | 206Pb/238U concordant scans    | 21 | 31 |  |  |  |  |  |               |  |  |  |  |  |  |  |  |  |
| P1413_006_Zrn_A_1_MBD_33 |  | 353                 | 113        | 3.13 | 0.08871            | 0.01991            | 0.01054             | 0.00067           | 0.06103            | 0.01358 | 0.17    | 86.30                             | 18.66   | 18.49   | 67.60               | 4.27    | 4.27    | 640.25             | 518.51  | 445.52  | 67.60    | 4.27                   | 4.27        | 206Pb/238U concordant scans    | 18 | 31 |  |  |  |  |  |               |  |  |  |  |  |  |  |  |  |
| P1413_006_Zrn_A_1_MBD_34 |  | 204                 | 52         | 3.88 | 0.07331            | 0.01232            | 0.01033             | 0.00079           | 0.04727            | 0.00915 | 0.06    | 66.14                             | 11.76   | 11.69   | 66.23               | 5.06    | 5.06    | 62.81              | 125.62  | 431.36  | 66.23    | 5.06                   | 5.06        | 206Pb/238U concordant scans    | 18 | 31 |  |  |  |  |  |               |  |  |  |  |  |  |  |  |  |
| P1413_006_Zrn_A_1_MBD_35 |  | 0                   | 0          | 0.00 | 0.00000            | 0.00000            | 0.00000             | 0.00000           | 0.00000            | 0.00000 | 0.00    | 0.00                              | 0.00    | 0.00    | 0.00                | 0.00    | 0.00    | 0.00               | 0.00    | 0.00    | failed   | 0                      | 0           |                                |    |    |  |  |  |  |  |               |  |  |  |  |  |  |  |  |  |
| P1413_006_Zrn_A_1_MBD_36 |  | 2241                | 2215       | 1.01 | 0.07389            | 0.00784            | 0.01081             | 0.00050           | 0.04958            | 0.00501 | 0.32    | 72.38                             | 7.42    | 7.40    | 69.30               | 3.18    | 3.18    | 175.27             | 244.50  | 227.47  | 69.30    | 3.18                   | 3.18        | 206Pb/238U concordant scans    | 12 | 31 |  |  |  |  |  |               |  |  |  |  |  |  |  |  |  |
| P1413_006_Zrn_A_1_MBD_37 |  | 369                 | 168        | 2.20 | 0.06896            | 0.00565            | 0.01029             | 0.00053           | 0.04859            | 0.00766 | 0.09    | 67.71                             | 10.15   | 10.10   | 66.01               | 3.38    | 3.38    | 128.12             | 256.25  | 351.46  | 66.01    | 3.38                   | 3.38        | 206Pb/238U concordant scans    | 16 | 31 |  |  |  |  |  |               |  |  |  |  |  |  |  |  |  |
| P1413_006_Zrn_A_1_MBD_38 |  | 1886                | 1116       | 1.69 | 0.06820            | 0.01028            | 0.01040             | 0.00053           | 0.04758            | 0.00328 | 0.48    | 66.99                             | 5.03    | 5.02    | 66.68               | 3.38    | 3.38    | 78.23              | 156.46  | 159.62  | 66.68    | 3.38                   | 3.38        | 206Pb/238U concordant scans    | 15 | 31 |  |  |  |  |  |               |  |  |  |  |  |  |  |  |  |
| P1413_006_Zrn_A_1_MBD_39 |  | 219                 | 62         | 3.51 | 0.08100            | 0.01562            | 0.01114             | 0.00074           | 0.05275            | 0.01039 | 0.10    | 79.09                             | 14.73   | 14.62   | 71.39               | 4.69    | 4.69    | 318.24             | 481.73  | 419.24  | 71.39    | 4.69                   | 4.69        | 206Pb/238U concordant scans    | 17 | 31 |  |  |  |  |  |               |  |  |  |  |  |  |  |  |  |
| P1413_006_Zrn_A_1_MBD_40 |  | 644                 | 296        | 2.17 | 0.06911            | 0.00711            | 0.01063             | 0.00046           | 0.04714            | 0.00474 | 0.25    | 67.85                             | 6.76    | 6.74    | 68.18               | 2.92    | 2.92    | 56.24              | 112.48  | 231.65  | 68.18    | 2.92                   | 2.92        | 206Pb/238U concordant scans    | 23 | 31 |  |  |  |  |  |               |  |  |  |  |  |  |  |  |  |
| P1413_006_Zrn_A_1_MBD_41 |  | 145                 | 26         | 5.60 | 0.08446            | 0.03252            | 0.01191             | 0.00032           | 0.05145            | 0.02023 | 0.13    | 82.33                             | 30.68   | 30.22   | 76.30               | 8.40    | 8.39    | 260.99             | 521.98  | 795.84  | 76.30    | 8.40                   | 8.39        | 206Pb/238U concordant scans    | 12 | 31 |  |  |  |  |  |               |  |  |  |  |  |  |  |  |  |
| P1413_006_Zrn_A_1_MBD_42 |  | 188                 | 43         | 4.32 | 0.07497            | 0.01233            | 0.01123             | 0.00063           | 0.04843            | 0.00806 | 0.17    | 73.41                             | 11.68   | 11.61   | 71.98               | 3.99    | 3.99    | 120.09             | 240.18  | 37      |          |                        |             |                                |    |    |  |  |  |  |  |               |  |  |  |  |  |  |  |  |  |

|                          |      |      |      |         |         |         |         |         |         |      |        |        |        |       |       |       |         |         |         |       |       |       |                                |    |    |
|--------------------------|------|------|------|---------|---------|---------|---------|---------|---------|------|--------|--------|--------|-------|-------|-------|---------|---------|---------|-------|-------|-------|--------------------------------|----|----|
| P1413_006_Zm_A_1_M80_77  | 224  | 59   | 3.77 | 0.07950 | 0.01475 | 0.01102 | 0.00047 | 0.05234 | 0.00969 | 0.12 | 77.67  | 13.92  | 13.83  | 70.62 | 2.98  | 2.98  | 300.38  | 452.32  | 396.85  | 70.62 | 2.98  | 2.98  | 206Pb/238U concordant scans    | 27 | 31 |
| P1413_006_Zm_A_1_M80_78  | 260  | 78   | 3.33 | 0.07510 | 0.01473 | 0.01082 | 0.00053 | 0.05032 | 0.00993 | 0.09 | 73.52  | 13.96  | 13.86  | 69.39 | 3.40  | 3.39  | 209.93  | 419.87  | 427.93  | 69.39 | 3.40  | 3.39  | 206Pb/238U concordant scans    | 15 | 31 |
| P1413_006_Zm_A_1_M80_79  | 351  | 111  | 3.17 | 0.08489 | 0.04653 | 0.01092 | 0.00081 | 0.05637 | 0.03111 | 0.01 | 82.73  | 44.02  | 43.09  | 70.03 | 5.18  | 5.18  | 466.88  | 933.75  | 1033.88 | 70.03 | 5.18  | 5.18  | 206Pb/238U concordant scans    | 9  | 31 |
| P1413_006_Zm_A_1_M80_80  | 373  | 141  | 2.64 | 0.06390 | 0.01258 | 0.00971 | 0.00063 | 0.04774 | 0.00963 | 0.08 | 62.89  | 12.04  | 11.97  | 62.28 | 4.00  | 4.00  | 86.17   | 172.34  | 446.69  | 62.28 | 4.00  | 4.00  | 206Pb/238U concordant scans    | 9  | 31 |
| P1413_006_Zm_A_1_M80_81  | 324  | 105  | 3.08 | 0.07560 | 0.01209 | 0.01050 | 0.00037 | 0.05221 | 0.00838 | 0.08 | 74.00  | 11.44  | 11.38  | 67.34 | 2.35  | 2.35  | 294.71  | 388.90  | 347.20  | 67.34 | 2.35  | 2.35  | 206Pb/238U concordant scans    | 17 | 31 |
| P1413_006_Zm_A_1_M80_82  | 564  | 378  | 1.49 | 0.07670 | 0.00655 | 0.01080 | 0.00037 | 0.05150 | 0.00441 | 0.17 | 75.04  | 6.18   | 6.16   | 69.26 | 2.35  | 2.35  | 263.38  | 202.54  | 190.64  | 69.26 | 2.35  | 2.35  | 206Pb/238U concordant scans    | 21 | 31 |
| P1413_006_Zm_A_1_M80_83  | 2140 | 2106 | 1.02 | 0.07098 | 0.00301 | 0.01074 | 0.00028 | 0.04793 | 0.00191 | 0.36 | 69.63  | 2.86   | 2.85   | 68.87 | 1.77  | 1.77  | 96.01   | 95.83   | 93.11   | 68.87 | 1.77  | 1.77  | 206Pb/238U concordant scans    | 23 | 31 |
| P1413_006_Zm_A_1_M80_84  | 359  | 115  | 3.12 | 0.07991 | 0.01613 | 0.01134 | 0.00036 | 0.05112 | 0.01028 | 0.10 | 78.06  | 15.22  | 15.11  | 72.68 | 2.29  | 2.29  | 246.27  | 492.53  | 432.63  | 72.68 | 2.29  | 2.29  | 206Pb/238U concordant scans    | 22 | 31 |
| P1413_006_Zm_A_1_M80_85  | 103  | 24   | 4.29 | 0.07991 | 0.02341 | 0.01118 | 0.00106 | 0.05185 | 0.01548 | 0.10 | 78.06  | 22.13  | 21.89  | 71.65 | 6.78  | 6.78  | 278.72  | 557.44  | 619.87  | 71.65 | 6.78  | 6.78  | 206Pb/238U concordant scans    | 10 | 31 |
| P1413_006_Zm_A_1_M80_86  | 252  | 113  | 2.22 | 0.07328 | 0.01287 | 0.01071 | 0.00040 | 0.04965 | 0.00879 | 0.05 | 71.81  | 12.21  | 12.14  | 68.64 | 2.54  | 2.53  | 178.55  | 357.10  | 388.73  | 68.64 | 2.54  | 2.53  | 206Pb/238U concordant scans    | 24 | 31 |
| P1413_006_Zm_A_1_M80_87  | 267  | 123  | 2.18 | 0.07598 | 0.00968 | 0.01024 | 0.00046 | 0.05381 | 0.00693 | 0.13 | 74.36  | 9.15   | 9.11   | 65.69 | 2.92  | 2.91  | 362.98  | 304.27  | 278.03  | 65.69 | 2.92  | 2.91  | 206Pb/238U concordant scans    | 23 | 31 |
| P1413_006_Zm_A_1_M80_88  | 363  | 124  | 2.92 | 0.07741 | 0.01152 | 0.01062 | 0.00037 | 0.05285 | 0.00786 | 0.11 | 75.70  | 10.89  | 10.83  | 68.12 | 2.38  | 2.38  | 322.22  | 356.72  | 321.26  | 68.12 | 2.38  | 2.38  | 206Pb/238U concordant scans    | 17 | 31 |
| P1413_006_Zm_A_1_M80_89  | 1013 | 400  | 2.53 | 0.07390 | 0.00746 | 0.01118 | 0.00048 | 0.04795 | 0.00472 | 0.26 | 72.39  | 7.06   | 7.04   | 71.66 | 3.07  | 3.07  | 96.78   | 193.55  | 225.13  | 71.66 | 3.07  | 3.07  | 206Pb/238U concordant scans    | 11 | 31 |
| P1413_006_Zm_A_1_M80_90  | 310  | 100  | 3.09 | 0.07231 | 0.01002 | 0.01103 | 0.00053 | 0.04753 | 0.00669 | 0.12 | 70.88  | 9.51   | 9.47   | 70.74 | 3.39  | 3.39  | 75.90   | 151.80  | 318.56  | 70.74 | 3.39  | 3.39  | 206Pb/238U concordant scans    | 17 | 31 |
| P1413_006_Zm_A_1_M80_91  | 1034 | 375  | 2.75 | 0.07430 | 0.00934 | 0.01107 | 0.00041 | 0.04867 | 0.00602 | 0.20 | 72.77  | 8.85   | 8.81   | 70.98 | 2.59  | 2.59  | 131.83  | 263.65  | 278.46  | 70.98 | 2.59  | 2.59  | 206Pb/238U concordant scans    | 7  | 31 |
| P1413_006_Zm_A_1_M80_92  | 228  | 78   | 2.93 | 0.07811 | 0.01522 | 0.01109 | 0.00066 | 0.05106 | 0.01001 | 0.13 | 76.36  | 14.39  | 14.28  | 71.12 | 4.22  | 4.22  | 243.62  | 486.31  | 422.98  | 71.12 | 4.22  | 4.22  | 206Pb/238U concordant scans    | 13 | 31 |
| P1413_006_Zm_A_1_M80_93  | 593  | 172  | 3.46 | 0.07386 | 0.00845 | 0.01104 | 0.00052 | 0.04853 | 0.00555 | 0.20 | 72.35  | 8.01   | 7.97   | 70.77 | 3.29  | 3.29  | 125.18  | 250.36  | 258.56  | 70.77 | 3.29  | 3.29  | 206Pb/238U concordant scans    | 16 | 31 |
| P1413_006_Zm_A_1_M80_94  | 200  | 60   | 3.34 | 0.06925 | 0.01666 | 0.01069 | 0.00062 | 0.04700 | 0.01140 | 0.08 | 67.98  | 15.88  | 15.76  | 68.52 | 3.97  | 3.97  | 49.07   | 98.13   | 533.50  | 68.52 | 3.97  | 3.97  | 206Pb/238U concordant scans    | 11 | 31 |
| P1413_006_Zm_A_1_M80_95  | 280  | 171  | 1.64 | 0.06762 | 0.01374 | 0.01036 | 0.00070 | 0.04733 | 0.00965 | 0.15 | 66.44  | 13.11  | 13.03  | 66.45 | 4.45  | 4.45  | 65.96   | 131.92  | 452.44  | 66.45 | 4.45  | 4.45  | 206Pb/238U concordant scans    | 14 | 31 |
| P1413_006_Zm_A_1_M80_96  | 217  | 78   | 2.79 | 0.07828 | 0.01068 | 0.01138 | 0.00043 | 0.04989 | 0.00683 | 0.11 | 76.53  | 10.08  | 10.04  | 72.96 | 2.77  | 2.77  | 189.65  | 335.29  | 304.04  | 72.96 | 2.77  | 2.77  | 206Pb/238U concordant scans    | 21 | 31 |
| P1413_006_Zm_A_1_M80_97  | 280  | 69   | 4.06 | 0.09050 | 0.02049 | 0.01111 | 0.00079 | 0.05906 | 0.01373 | 0.06 | 87.97  | 19.17  | 18.99  | 71.25 | 5.02  | 5.02  | 569.21  | 550.58  | 469.29  | 71.25 | 5.02  | 5.02  | 206Pb/238U concordant scans    | 8  | 31 |
| P1413_006_Zm_A_1_M80_98  | 187  | 61   | 3.08 | 0.07593 | 0.01776 | 0.01072 | 0.00052 | 0.05138 | 0.01207 | 0.08 | 74.31  | 16.83  | 16.69  | 68.73 | 3.29  | 3.29  | 257.91  | 515.83  | 499.09  | 68.73 | 3.29  | 3.29  | 206Pb/238U concordant scans    | 17 | 31 |
| P1413_006_Zm_A_1_M80_99  | 87   | 15   | 5.98 | 0.10909 | 0.07445 | 0.01140 | 0.00071 | 0.06941 | 0.04742 | 0.03 | 105.14 | 69.33  | 67.04  | 73.06 | 4.53  | 4.53  | 911.06  | 1822.11 | 1158.66 | 73.06 | 4.53  | 4.53  | 206Pb/238U concordant scans    | 11 | 31 |
| P1413_006_Zm_A_1_M80_100 | 414  | 111  | 3.73 | 0.07630 | 0.01033 | 0.01088 | 0.00053 | 0.05084 | 0.00674 | 0.23 | 74.66  | 9.77   | 9.73   | 69.78 | 3.40  | 3.40  | 233.78  | 321.27  | 292.39  | 69.78 | 3.40  | 3.40  | 206Pb/238U concordant scans    | 19 | 31 |
| P1413_006_Zm_A_1_M80_101 | 277  | 128  | 2.16 | 0.07914 | 0.01189 | 0.01135 | 0.00060 | 0.05057 | 0.00789 | 0.05 | 77.33  | 11.22  | 11.16  | 72.75 | 3.85  | 3.85  | 221.48  | 382.54  | 342.30  | 72.75 | 3.85  | 3.85  | 206Pb/238U concordant scans    | 18 | 31 |
| P1413_006_Zm_A_1_M80_102 | 426  | 137  | 3.11 | 0.07157 | 0.00933 | 0.01078 | 0.00053 | 0.04814 | 0.00623 | 0.20 | 70.19  | 8.86   | 8.82   | 69.13 | 3.37  | 3.37  | 106.23  | 212.47  | 292.38  | 69.13 | 3.37  | 3.37  | 206Pb/238U concordant scans    | 24 | 31 |
| P1413_006_Zm_A_1_M80_103 | 240  | 56   | 4.28 | 0.06958 | 0.01330 | 0.01024 | 0.00043 | 0.04930 | 0.00953 | 0.05 | 68.30  | 12.67  | 12.59  | 65.66 | 2.73  | 2.73  | 161.94  | 323.89  | 423.16  | 65.66 | 2.73  | 2.73  | 206Pb/238U concordant scans    | 23 | 31 |
| P1413_006_Zm_A_1_M80_104 | 373  | 131  | 2.85 | 0.07480 | 0.02219 | 0.01115 | 0.00136 | 0.04864 | 0.01464 | 0.17 | 73.24  | 21.07  | 20.86  | 71.50 | 8.68  | 8.67  | 130.44  | 260.88  | 640.49  | 71.50 | 8.68  | 8.67  | 206Pb/238U concordant scans    | 6  | 31 |
| P1413_006_Zm_A_1_M80_105 | 201  | 46   | 4.33 | 0.07129 | 0.01014 | 0.01030 | 0.00052 | 0.05019 | 0.00733 | 0.09 | 69.93  | 9.64   | 9.59   | 66.07 | 3.32  | 3.32  | 203.91  | 357.98  | 322.54  | 66.07 | 3.32  | 3.32  | 206Pb/238U concordant scans    | 13 | 31 |
| P1413_006_Zm_A_1_M80_106 | 1226 | 911  | 1.35 | 0.06996 | 0.00502 | 0.01074 | 0.00033 | 0.04726 | 0.00350 | 0.09 | 68.66  | 4.77   | 4.76   | 68.85 | 2.08  | 2.08  | 62.18   | 124.36  | 171.93  | 68.85 | 2.08  | 2.08  | 206Pb/238U concordant scans    | 21 | 31 |
| P1413_006_Zm_A_1_M80_107 | 990  | 747  | 1.32 | 0.07330 | 0.00586 | 0.01055 | 0.00037 | 0.05038 | 0.00418 | 0.09 | 71.82  | 5.55   | 5.54   | 67.66 | 2.33  | 2.33  | 212.74  | 197.98  | 186.64  | 67.66 | 2.33  | 2.33  | 206Pb/238U concordant scans    | 21 | 31 |
| P1413_006_Zm_A_1_M80_108 | 274  | 74   | 3.69 | 0.07793 | 0.01227 | 0.01126 | 0.00034 | 0.05019 | 0.00794 | 0.05 | 76.20  | 11.59  | 11.52  | 72.18 | 2.18  | 2.18  | 204.02  | 389.37  | 347.80  | 72.18 | 2.18  | 2.18  | 206Pb/238U concordant scans    | 26 | 31 |
| P1413_006_Zm_A_1_M80_109 | 596  | 181  | 3.29 | 0.06841 | 0.00764 | 0.01057 | 0.00041 | 0.04695 | 0.00535 | 0.10 | 67.19  | 7.27   | 7.25   | 67.77 | 2.63  | 2.63  | 46.53   | 93.05   | 261.38  | 67.77 | 2.63  | 2.63  | 206Pb/238U concordant scans    | 11 | 31 |
| P1413_006_Zm_A_1_M80_110 | 728  | 303  | 2.41 | 0.07701 | 0.00961 | 0.01162 | 0.00035 | 0.04805 | 0.00603 | 0.08 | 75.33  | 9.08   | 9.04   | 74.49 | 2.24  | 2.24  | 101.94  | 203.87  | 283.97  | 74.49 | 2.24  | 2.24  | 206Pb/238U concordant scans    | 12 | 31 |
| P1413_006_Zm_A_1_M80_111 | 166  | 70   | 2.38 | 0.06789 | 0.01576 | 0.01027 | 0.00054 | 0.04792 | 0.01131 | 0.03 | 66.69  | 15.04  | 14.93  | 65.90 | 3.44  | 3.44  | 95.23   | 190.46  | 516.03  | 65.90 | 3.44  | 3.44  | 206Pb/238U concordant scans    | 18 | 31 |
| P1413_006_Zm_A_1_M80_112 | 113  | 46   | 2.47 | 0.07594 | 0.01967 | 0.01116 | 0.00062 | 0.04937 | 0.01285 | 0.08 | 74.32  | 18.65  | 18.48  | 71.52 | 3.98  | 3.98  | 165.31  | 330.63  | 557.54  | 71.52 | 3.98  | 3.98  | 206Pb/238U concordant scans    | 20 | 31 |
| P1413_006_Zm_A_1_M80_113 | 118  | 27   | 4.35 | 0.14990 | 0.16915 | 0.01384 | 0.00271 | 0.07857 | 0.08978 | 0.01 | 141.82 | 155.15 | 144.13 | 88.59 | 17.25 | 17.22 | 1161.29 | 2322.58 | 1691.03 | 88.59 | 17.25 | 17.22 | 206Pb/238U concordant scans    | 1  | 31 |
| P1413_006_Zm_A_1_M80_114 | 1013 | 373  | 2.71 | 0.07130 | 0.00538 | 0.01068 | 0.00034 | 0.04840 | 0.00350 | 0.29 | 69.93  | 5.11   | 5.09   | 68.51 | 2.18  | 2.18  | 118.65  | 175.16  | 166.28  | 68.51 | 2.18  | 2.18  | 206Pb/238U concordant scans    | 26 | 31 |
| P1413_006_Zm_A_1_M80_115 | 326  | 118  | 2.76 | 0.07152 | 0.01139 | 0.01067 | 0.00054 | 0.04861 | 0.00781 | 0.12 | 70.14  | 10.82  | 10.77  | 68.43 | 3.46  | 3.46  | 129.12  | 258.24  | 357.60  | 68.43 | 3.46  | 3.46  | 206Pb/238U concordant scans    | 21 | 31 |
| P1413_006_Zm_A_1_M80_116 | 776  | 281  | 2.76 | 0.07985 | 0.01960 | 0.01164 | 0.00069 | 0.04975 | 0.01212 | 0.15 | 78.00  | 18.51  | 18.34  | 74.61 | 4.40  | 4.40  | 183.13  | 366.26  | 523.04  | 74.61 | 4.40  | 4.40  | 206Pb/238U concordant scans    | 3  | 31 |
| P1413_006_Zm_A_1_M80_117 | 274  | 78   | 3.52 | 0.07062 | 0.01040 | 0.01033 | 0.00056 | 0.04959 | 0.00748 | 0.11 | 69.29  | 9.89   | 9.84   | 66.23 | 3.57  | 3.57  | 176.00  | 352.00  | 334.00  | 66.23 | 3.57  | 3.57  | 206Pb/238U concordant scans    | 12 | 31 |
| P1413_006_Zm_A_1_M80_118 | 152  | 45   | 3.36 | 0.06746 | 0.01801 | 0.01070 | 0.00060 | 0.04572 | 0.01226 | 0.08 | 66.28  | 17.20  | 17.06  | 68.62 | 3.84  | 3.84  | 0.00    | 0.00    | 557.34  | 0.00  | 0.00  | 0.00  | Pbc-corrected concordant scans | 19 | 31 |
| P1413_006_Zm_A_1_M80_119 | 810  | 252  | 3.21 | 0.07312 | 0.00487 | 0.01100 | 0.00034 | 0.04821 | 0.00318 | 0.22 | 71.65  | 4.62   | 4.61   | 70.52 | 2.14  | 2.14  | 109.60  | 159.55  | 152.15  | 70.52 | 2.14  | 2.14  | 206Pb/238U concordant scans    | 20 | 31 |

## Data Repository Item E - U/Pb zircon analytical results from Cantwell Formation bentonites

## Zircon

EFKtoklat01

1413-07

| Concordant Scans: Isotopic Ratios |            |      |            |         |            |         |             |         |       | Concordant Scans: Ages |            |         |          |            |         |          |             |         |          | Preferred Age      |         |                             |          | Concordant | Total Scan |
|-----------------------------------|------------|------|------------|---------|------------|---------|-------------|---------|-------|------------------------|------------|---------|----------|------------|---------|----------|-------------|---------|----------|--------------------|---------|-----------------------------|----------|------------|------------|
| [U] (ppm)                         | [Th] (ppm) | U/Th | 207Pb/235U | 2-sigma | 206Pb/238U | 2-sigma | 207Pb/206Pb | 2-sigma | Error | Correlation            | 207Pb/235U | 2-sigma | +2-sigma | 206Pb/238U | 2-sigma | +2-sigma | 207Pb/206Pb | 2-sigma | +2-sigma | Preferred Age (Ma) | 2-sigma | +2-sigma                    | Age Type |            |            |
| 536                               | 179        | 3.00 | 0.06044    | 0.00609 | 0.00895    | 0.00031 | 0.04900     | 0.00501 | 0.10  | 59.59                  | 5.84       | 5.83    | 57.42    | 1.96       | 1.96    | 147.71   | 249.05      | 231.44  | 57.42    | 1.96               | 1.96    | 206Pb/238U concordant scans | 18       | 31         |            |
| 295                               | 96         | 3.08 | 0.06373    | 0.01800 | 0.00896    | 0.00052 | 0.05160     | 0.01481 | 0.02  | 62.73                  | 17.25      | 17.11   | 57.49    | 3.35       | 3.35    | 267.55   | 535.10      | 599.07  | 57.49    | 3.35               | 3.35    | 206Pb/238U concordant scans | 14       | 31         |            |
| 470                               | 118        | 3.99 | 0.06207    | 0.00883 | 0.00898    | 0.00037 | 0.05013     | 0.00729 | 0.05  | 61.14                  | 8.46       | 8.42    | 57.63    | 2.34       | 2.33    | 200.85   | 356.18      | 321.09  | 57.63    | 2.34               | 2.33    | 206Pb/238U concordant scans | 18       | 31         |            |
| 154                               | 35         | 4.43 | 0.07514    | 0.01987 | 0.00917    | 0.00069 | 0.05946     | 0.01620 | 0.03  | 73.56                  | 18.85      | 18.68   | 58.81    | 4.39       | 4.39    | 583.92   | 653.95      | 542.23  | 58.81    | 4.39               | 4.39    | 206Pb/238U concordant scans | 16       | 31         |            |
| 449                               | 150        | 2.98 | 0.06276    | 0.00843 | 0.00932    | 0.00035 | 0.04886     | 0.00660 | 0.11  | 61.81                  | 8.07       | 8.04    | 59.78    | 2.24       | 2.24    | 141.14   | 282.28      | 302.62  | 59.78    | 2.24               | 2.24    | 206Pb/238U concordant scans | 23       | 31         |            |
| 257                               | 63         | 4.08 | 0.06239    | 0.01186 | 0.00972    | 0.00039 | 0.04653     | 0.00886 | 0.09  | 61.45                  | 11.37      | 11.31   | 62.38    | 2.47       | 2.47    | 25.37    | 50.75       | 427.77  | 62.38    | 2.47               | 2.47    | 206Pb/238U concordant scans | 20       | 31         |            |
| 272                               | 124        | 2.19 | 0.07502    | 0.01169 | 0.01106    | 0.00032 | 0.04921     | 0.00768 | 0.07  | 73.45                  | 11.07      | 11.01   | 70.89    | 2.03       | 2.03    | 157.74   | 315.48      | 346.24  | 70.89    | 2.03               | 2.03    | 206Pb/238U concordant scans | 25       | 31         |            |
| 286                               | 58         | 4.97 | 0.09268    | 0.01428 | 0.01318    | 0.00091 | 0.05101     | 0.00838 | 0.06  | 90.00                  | 13.32      | 13.23   | 84.40    | 5.76       | 5.76    | 241.10   | 402.47      | 358.12  | 84.40    | 5.76               | 5.76    | 206Pb/238U concordant scans | 11       | 31         |            |
| 286                               | 70         | 4.11 | 0.08892    | 0.01302 | 0.01327    | 0.00084 | 0.04859     | 0.00687 | 0.29  | 86.49                  | 12.18      | 12.11   | 85.00    | 5.34       | 5.34    | 127.94   | 255.89      | 317.02  | 85.00    | 5.34               | 5.34    | 206Pb/238U concordant scans | 14       | 31         |            |
| 314                               | 101        | 3.10 | 0.08740    | 0.01332 | 0.01332    | 0.00062 | 0.04758     | 0.00746 | 0.05  | 85.08                  | 12.48      | 12.40   | 85.32    | 3.97       | 3.97    | 78.33    | 156.66      | 352.52  | 85.32    | 3.97               | 3.97    | 206Pb/238U concordant scans | 12       | 31         |            |
| 955                               | 407        | 2.35 | 0.09144    | 0.00771 | 0.01332    | 0.00037 | 0.04978     | 0.00416 | 0.16  | 88.85                  | 7.18       | 7.16    | 85.32    | 2.35       | 2.34    | 184.55   | 200.83      | 189.19  | 85.32    | 2.35               | 2.34    | 206Pb/238U concordant scans | 17       | 31         |            |
| 287                               | 95         | 3.01 | 0.10153    | 0.01586 | 0.01335    | 0.00059 | 0.05518     | 0.00869 | 0.10  | 98.19                  | 14.68      | 14.57   | 85.46    | 3.78       | 3.78    | 419.43   | 372.26      | 333.59  | 85.46    | 3.78               | 3.78    | 206Pb/238U concordant scans | 22       | 31         |            |
| 304                               | 86         | 3.55 | 0.09112    | 0.01484 | 0.01335    | 0.00070 | 0.04951     | 0.00818 | 0.11  | 88.55                  | 13.86      | 13.76   | 85.48    | 4.48       | 4.48    | 172.12   | 344.24      | 364.51  | 85.48    | 4.48               | 4.48    | 206Pb/238U concordant scans | 19       | 31         |            |
| 357                               | 107        | 3.35 | 0.09368    | 0.01019 | 0.01338    | 0.00054 | 0.05079     | 0.00554 | 0.16  | 90.92                  | 9.48       | 9.44    | 85.66    | 3.42       | 3.42    | 231.25   | 261.99      | 242.46  | 85.66    | 3.42               | 3.42    | 206Pb/238U concordant scans | 18       | 31         |            |
| 973                               | 590        | 1.65 | 0.08855    | 0.00660 | 0.01338    | 0.00035 | 0.04798     | 0.00361 | 0.11  | 86.15                  | 6.17       | 6.15    | 85.71    | 2.24       | 2.24    | 98.52    | 183.11      | 173.44  | 85.71    | 2.24               | 2.24    | 206Pb/238U concordant scans | 31       | 31         |            |
| 238                               | 49         | 4.81 | 0.09194    | 0.01819 | 0.01339    | 0.00064 | 0.04981     | 0.00981 | 0.13  | 89.30                  | 16.98      | 16.84   | 85.73    | 4.07       | 4.07    | 185.91   | 371.81      | 428.97  | 85.73    | 4.07               | 4.07    | 206Pb/238U concordant scans | 20       | 31         |            |
| 370                               | 121        | 3.05 | 0.09576    | 0.01058 | 0.01346    | 0.00038 | 0.05158     | 0.00576 | 0.05  | 92.85                  | 9.82       | 9.78    | 86.21    | 2.40       | 2.40    | 266.96   | 266.93      | 246.65  | 86.21    | 2.40               | 2.40    | 206Pb/238U concordant scans | 26       | 31         |            |
| 511                               | 178        | 2.87 | 0.08942    | 0.00775 | 0.01350    | 0.00041 | 0.04803     | 0.00419 | 0.12  | 86.96                  | 7.23       | 7.21    | 86.46    | 2.58       | 2.58    | 100.71   | 201.41      | 200.10  | 86.46    | 2.58               | 2.58    | 206Pb/238U concordant scans | 19       | 31         |            |
| 301                               | 89         | 3.39 | 0.09006    | 0.01454 | 0.01351    | 0.00071 | 0.04833     | 0.00783 | 0.14  | 87.55                  | 13.59      | 13.50   | 86.54    | 4.55       | 4.54    | 115.44   | 230.88      | 361.45  | 86.54    | 4.55               | 4.54    | 206Pb/238U concordant scans | 17       | 31         |            |
| 261                               | 70         | 3.71 | 0.09651    | 0.02372 | 0.01352    | 0.00069 | 0.05178     | 0.01289 | 0.03  | 93.55                  | 22.08      | 21.84   | 86.56    | 4.36       | 4.36    | 275.68   | 551.37      | 525.03  | 86.56    | 4.36               | 4.36    | 206Pb/238U concordant scans | 18       | 31         |            |
| 215                               | 54         | 3.97 | 0.10067    | 0.01722 | 0.01352    | 0.00064 | 0.05399     | 0.00936 | 0.08  | 97.39                  | 15.95      | 15.83   | 86.59    | 4.07       | 4.07    | 370.59   | 416.08      | 368.49  | 86.59    | 4.07               | 4.07    | 206Pb/238U concordant scans | 16       | 31         |            |
| 785                               | 375        | 2.09 | 0.08646    | 0.00827 | 0.01355    | 0.00042 | 0.04627     | 0.00444 | 0.13  | 84.20                  | 7.75       | 7.72    | 86.78    | 2.65       | 2.65    | 11.75    | 23.51       | 222.84  | 86.78    | 2.65               | 2.65    | 206Pb/238U concordant scans | 18       | 31         |            |
| 379                               | 113        | 3.34 | 0.09599    | 0.01447 | 0.01357    | 0.00056 | 0.05129     | 0.00779 | 0.10  | 93.07                  | 13.45      | 13.36   | 86.90    | 3.58       | 3.58    | 254.01   | 369.48      | 331.73  | 86.90    | 3.58               | 3.58    | 206Pb/238U concordant scans | 22       | 31         |            |
| 228                               | 49         | 4.63 | 0.09889    | 0.01646 | 0.01358    | 0.00062 | 0.05280     | 0.00894 | 0.06  | 95.75                  | 15.27      | 15.15   | 86.98    | 3.92       | 3.92    | 320.09   | 409.59      | 363.53  | 86.98    | 3.92               | 3.92    | 206Pb/238U concordant scans | 18       | 31         |            |
| 274                               | 66         | 4.16 | 0.09793    | 0.01245 | 0.01361    | 0.00062 | 0.05218     | 0.00673 | 0.13  | 94.87                  | 11.55      | 11.48   | 87.16    | 3.96       | 3.96    | 293.14   | 308.87      | 281.98  | 87.16    | 3.96               | 3.96    | 206Pb/238U concordant scans | 22       | 31         |            |
| 321                               | 66         | 4.87 | 0.09096    | 0.00919 | 0.01364    | 0.00055 | 0.04837     | 0.00497 | 0.14  | 88.40                  | 8.57       | 8.53    | 87.33    | 3.52       | 3.52    | 117.42   | 234.84      | 233.82  | 87.33    | 3.52               | 3.52    | 206Pb/238U concordant scans | 19       | 31         |            |
| 402                               | 135        | 2.97 | 0.09311    | 0.01266 | 0.01366    | 0.00052 | 0.04943     | 0.00681 | 0.07  | 90.40                  | 11.79      | 11.72   | 87.47    | 3.28       | 3.28    | 168.43   | 336.66      | 306.95  | 87.47    | 3.28               | 3.28    | 206Pb/238U concordant scans | 18       | 31         |            |
| 387                               | 166        | 2.33 | 0.10229    | 0.01343 | 0.01367    | 0.00048 | 0.05426     | 0.00723 | 0.06  | 98.89                  | 12.41      | 12.33   | 87.55    | 3.06       | 3.05    | 381.67   | 314.33      | 286.37  | 87.55    | 3.06               | 3.05    | 206Pb/238U concordant scans | 23       | 31         |            |
| 266                               | 75         | 3.54 | 0.09344    | 0.01495 | 0.01368    | 0.00047 | 0.04953     | 0.00795 | 0.08  | 90.71                  | 13.93      | 13.83   | 87.61    | 2.99       | 2.99    | 172.99   | 345.99      | 354.74  | 87.61    | 2.99               | 2.99    | 206Pb/238U concordant scans | 17       | 31         |            |
| 195                               | 46         | 4.29 | 0.09682    | 0.02222 | 0.01368    | 0.00064 | 0.05132     | 0.01183 | 0.07  | 93.84                  | 20.68      | 20.47   | 87.61    | 4.08       | 4.08    | 255.21   | 510.43      | 490.83  | 87.61    | 4.08               | 4.08    | 206Pb/238U concordant scans | 19       | 31         |            |
| 273                               | 58         | 4.70 | 0.09065    | 0.01478 | 0.01368    | 0.00075 | 0.04805     | 0.00787 | 0.15  | 88.11                  | 13.81      | 13.71   | 87.62    | 4.75       | 4.74    | 101.59   | 203.18      | 365.98  | 87.62    | 4.75               | 4.74    | 206Pb/238U concordant scans | 14       | 31         |            |
| 549                               | 201        | 2.73 | 0.09219    | 0.00868 | 0.01369    | 0.00045 | 0.04885     | 0.00460 | 0.15  | 89.54                  | 8.08       | 8.05    | 87.64    | 2.89       | 2.89    | 140.46   | 229.12      | 214.13  | 87.64    | 2.89               | 2.89    | 206Pb/238U concordant scans | 13       | 31         |            |
| 718                               | 293        | 2.45 | 0.09769    | 0.00969 | 0.01373    | 0.00048 | 0.05162     | 0.00516 | 0.14  | 94.64                  | 8.99       | 8.95    | 87.88    | 3.07       | 3.07    | 268.61   | 237.69      | 221.47  | 87.88    | 3.07               | 3.07    | 206Pb/238U concordant scans | 17       | 31         |            |
| 293                               | 78         | 3.73 | 0.09048    | 0.01770 | 0.01375    | 0.00059 | 0.04772     | 0.00944 | 0.05  | 87.95                  | 16.55      | 16.42   | 88.04    | 3.73       | 3.72    | 85.40    | 170.79      | 438.46  | 88.04    | 3.73               | 3.72    | 206Pb/238U concordant scans | 15       | 31         |            |
| 307                               | 120        | 2.55 | 0.10051    | 0.01467 | 0.01375    | 0.00046 | 0.05301     | 0.00779 | 0.07  | 97.24                  | 13.58      | 13.49   | 88.05    | 2.94       | 2.94    | 329.10   | 351.98      | 317.40  | 88.05    | 2.94               | 2.94    | 206Pb/238U concordant scans | 20       | 31         |            |
| 171                               | 36         | 4.69 | 0.10194    | 0.01865 | 0.01377    | 0.00061 | 0.05370     | 0.00983 | 0.11  | 98.57                  | 17.25      | 17.11   | 88.16    | 3.86       | 3.86    | 358.30   | 442.17      | 388.84  | 88.16    | 3.86               | 3.86    | 206Pb/238U concordant scans | 20       | 31         |            |
| 531                               | 237        | 2.24 | 0.09301    | 0.00891 | 0.01377    | 0.00036 | 0.04898     | 0.00472 | 0.09  | 90.30                  | 8.29       | 8.26    | 88.17    | 2.31       | 2.30    | 147.00   | 234.18      | 218.54  | 88.17    | 2.31               | 2.30    | 206Pb/238U concordant scans | 22       | 31         |            |
| 197                               | 63         | 3.15 | 0.09586    | 0.01496 | 0.01379    | 0.00069 | 0.05041     | 0.00806 | 0.06  | 92.95                  | 13.91      | 13.81   | 88.29    | 4.37       | 4.36    | 214.13   | 393.80      | 351.31  | 88.29    | 4.37               | 4.36    | 206Pb/238U concordant scans | 23       | 31         |            |
| 936                               | 543        | 1.72 |            |         |            |         |             |         |       |                        |            |         |          |            |         |          |             |         |          |                    |         |                             |          |            |            |

|      |     |      |          |         |         |         |         |         |      |         |        |        |         |        |        |         |        |        |         |        |        |                              |        |        |   |   |
|------|-----|------|----------|---------|---------|---------|---------|---------|------|---------|--------|--------|---------|--------|--------|---------|--------|--------|---------|--------|--------|------------------------------|--------|--------|---|---|
| 78   | 13  | 6.01 | 0.11611  | 0.04024 | 0.01433 | 0.00143 | 0.05878 | 0.02102 | 0.03 | 111.54  | 36.95  | 36.28  | 91.69   | 9.08   | 9.07   | 559.09  | 893.01 | 696.94 | 91.69   | 9.08   | 9.07   | 206Pb/238U concordant scans  | 10     | 31     |   |   |
| 288  | 100 | 2.87 | 0.09434  | 0.01955 | 0.01437 | 0.00067 | 0.04760 | 0.09897 | 0.10 | 91.54   | 18.22  | 18.06  | 92.00   | 4.24   | 4.23   | 79.60   | 159.21 | 458.77 | 92.00   | 4.24   | 4.23   | 206Pb/238U concordant scans  | 16     | 31     |   |   |
| 427  | 178 | 2.40 | 0.09910  | 0.01149 | 0.01437 | 0.00040 | 0.05000 | 0.00579 | 0.11 | 95.95   | 10.64  | 10.59  | 92.00   | 2.52   | 2.52   | 195.07  | 280.62 | 258.39 | 92.00   | 2.52   | 2.52   | 206Pb/238U concordant scans  | 23     | 31     |   |   |
| 394  | 124 | 3.19 | 0.10557  | 0.01597 | 0.01443 | 0.00053 | 0.05307 | 0.00804 | 0.11 | 101.91  | 14.72  | 14.62  | 92.33   | 3.37   | 3.37   | 331.99  | 362.96 | 326.30 | 92.33   | 3.37   | 3.37   | 206Pb/238U concordant scans  | 12     | 31     |   |   |
| 307  | 88  | 3.47 | 0.11046  | 0.01320 | 0.01449 | 0.00062 | 0.05528 | 0.00660 | 0.17 | 106.39  | 12.11  | 12.04  | 92.76   | 3.97   | 3.97   | 423.39  | 278.08 | 255.92 | 92.76   | 3.97   | 3.97   | 206Pb/238U concordant scans  | 26     | 31     |   |   |
| 275  | 75  | 3.69 | 0.09982  | 0.01075 | 0.01458 | 0.00064 | 0.04966 | 0.00544 | 0.14 | 96.61   | 9.95   | 9.90   | 93.30   | 4.06   | 4.06   | 179.26  | 265.98 | 245.94 | 93.30   | 4.06   | 4.06   | 206Pb/238U concordant scans  | 15     | 31     |   |   |
| 213  | 67  | 3.17 | 0.09496  | 0.01615 | 0.01460 | 0.00079 | 0.04717 | 0.00801 | 0.15 | 92.12   | 15.03  | 14.92  | 93.45   | 5.00   | 5.00   | 57.67   | 115.34 | 93.45  | 93.45   | 5.00   | 5.00   | 206Pb/238U concordant scans  | 19     | 31     |   |   |
| 334  | 105 | 3.20 | 0.09848  | 0.01840 | 0.01465 | 0.00075 | 0.04874 | 0.00904 | 0.16 | 95.37   | 17.08  | 16.94  | 93.78   | 4.77   | 4.77   | 135.41  | 270.83 | 409.19 | 93.78   | 4.77   | 4.77   | 206Pb/238U concordant scans  | 15     | 31     |   |   |
| 272  | 69  | 3.94 | 0.10201  | 0.01145 | 0.01471 | 0.00062 | 0.05031 | 0.00578 | 0.11 | 98.63   | 10.57  | 10.52  | 94.12   | 3.94   | 3.94   | 209.13  | 278.10 | 256.22 | 94.12   | 3.94   | 3.94   | 206Pb/238U concordant scans  | 15     | 31     |   |   |
| 412  | 215 | 1.91 | 0.09673  | 0.00856 | 0.01474 | 0.00050 | 0.04761 | 0.00426 | 0.13 | 93.76   | 7.94   | 7.91   | 94.31   | 3.15   | 3.15   | 79.75   | 159.50 | 205.97 | 94.31   | 3.15   | 3.15   | 206Pb/238U concordant scans  | 20     | 31     |   |   |
| 526  | 173 | 3.04 | 0.09901  | 0.01114 | 0.01474 | 0.00043 | 0.04763 | 0.00547 | 0.12 | 95.86   | 10.32  | 10.27  | 94.31   | 2.71   | 2.71   | 134.63  | 269.27 | 253.80 | 94.31   | 2.71   | 2.71   | 206Pb/238U concordant scans  | 19     | 31     |   |   |
| 305  | 101 | 3.02 | 0.09960  | 0.01324 | 0.01481 | 0.00063 | 0.04878 | 0.00656 | 0.11 | 96.41   | 12.26  | 12.19  | 94.76   | 3.98   | 3.97   | 137.29  | 274.58 | 301.75 | 94.76   | 3.98   | 3.97   | 206Pb/238U concordant scans  | 17     | 31     |   |   |
| 704  | 500 | 1.41 | 0.10139  | 0.00687 | 0.01486 | 0.00037 | 0.04947 | 0.00334 | 0.16 | 98.06   | 6.34   | 6.32   | 95.11   | 2.32   | 2.32   | 170.27  | 161.42 | 153.82 | 95.11   | 2.32   | 2.32   | 206Pb/238U concordant scans  | 24     | 31     |   |   |
| 204  | 47  | 4.29 | 0.10774  | 0.01803 | 0.01492 | 0.00070 | 0.05238 | 0.00896 | 0.04 | 103.89  | 16.60  | 16.46  | 95.46   | 4.42   | 4.42   | 301.87  | 415.58 | 368.28 | 95.46   | 4.42   | 4.42   | 206Pb/238U concordant scans  | 20     | 31     |   |   |
| 381  | 122 | 3.14 | 0.10222  | 0.00943 | 0.01492 | 0.00076 | 0.04968 | 0.00465 | 0.24 | 98.82   | 8.71   | 8.67   | 95.49   | 4.86   | 4.85   | 179.89  | 225.75 | 211.15 | 95.49   | 4.86   | 4.85   | 206Pb/238U concordant scans  | 12     | 31     |   |   |
| 427  | 149 | 2.86 | 0.10390  | 0.01530 | 0.01499 | 0.00075 | 0.05027 | 0.00754 | 0.11 | 100.37  | 14.12  | 14.02  | 95.90   | 4.74   | 4.74   | 207.71  | 367.58 | 330.31 | 95.90   | 4.74   | 4.74   | 206Pb/238U concordant scans  | 9      | 31     |   |   |
| 1586 | 763 | 2.11 | 0.10505  | 0.01072 | 0.01508 | 0.00049 | 0.05052 | 0.00511 | 0.18 | 101.43  | 9.88   | 9.83   | 96.49   | 3.12   | 3.12   | 219.12  | 242.82 | 225.97 | 96.49   | 3.12   | 3.12   | 206Pb/238U concordant scans  | 10     | 31     |   |   |
| 148  | 37  | 4.02 | 0.10659  | 0.02546 | 0.01519 | 0.00119 | 0.05089 | 0.01230 | 0.12 | 102.84  | 23.49  | 23.22  | 97.19   | 7.53   | 7.52   | 235.80  | 471.59 | 514.57 | 97.19   | 7.53   | 7.52   | 206Pb/238U concordant scans  | 9      | 31     |   |   |
| 402  | 156 | 2.58 | 0.10610  | 0.01134 | 0.01519 | 0.00058 | 0.05064 | 0.00545 | 0.14 | 102.39  | 10.44  | 10.38  | 97.22   | 3.70   | 3.70   | 224.56  | 258.89 | 239.81 | 97.22   | 3.70   | 3.70   | 206Pb/238U concordant scans  | 22     | 31     |   |   |
| 62   | 13  | 4.91 | 0.12247  | 0.03623 | 0.01583 | 0.00146 | 0.05612 | 0.01729 | 0.02 | 117.31  | 33.04  | 32.51  | 101.23  | 9.24   | 9.24   | 457.23  | 767.71 | 619.08 | 101.23  | 9.24   | 9.24   | 206Pb/238U concordant scans  | 14     | 31     |   |   |
| 502  | 200 | 2.51 | 0.12256  | 0.01329 | 0.01717 | 0.00053 | 0.05177 | 0.00558 | 0.15 | 117.39  | 12.06  | 11.99  | 109.74  | 3.37   | 3.37   | 275.43  | 256.93 | 238.07 | 109.74  | 3.37   | 3.37   | 206Pb/238U concordant scans  | 20     | 31     |   |   |
| 1571 | 971 | 1.62 | 0.23752  | 0.00968 | 0.03368 | 0.00096 | 0.05114 | 0.00195 | 0.40 | 216.38  | 7.96   | 7.93   | 213.57  | 6.01   | 6.01   | 247.16  | 88.80  | 86.44  | 213.57  | 6.01   | 6.01   | 206Pb/238U concordant scans  | 29     | 31     |   |   |
| 1301 | 627 | 2.08 | 0.23549  | 0.01145 | 0.03406 | 0.00071 | 0.05014 | 0.00238 | 0.23 | 214.72  | 9.43   | 9.39   | 215.94  | 4.44   | 4.44   | 201.41  | 111.89 | 108.17 | 215.94  | 4.44   | 4.44   | 206Pb/238U concordant scans  | 27     | 31     |   |   |
| 563  | 164 | 3.43 | 0.24466  | 0.01475 | 0.03419 | 0.00108 | 0.05190 | 0.00313 | 0.23 | 222.23  | 12.07  | 12.00  | 216.70  | 6.72   | 6.72   | 281.19  | 140.97 | 135.10 | 216.70  | 6.72   | 6.72   | 206Pb/238U concordant scans  | 16     | 31     |   |   |
| 531  | 153 | 3.46 | 0.24255  | 0.01356 | 0.03431 | 0.00081 | 0.05127 | 0.00288 | 0.15 | 220.50  | 11.11  | 11.05  | 217.47  | 5.08   | 5.08   | 252.97  | 131.92 | 126.77 | 217.47  | 5.08   | 5.08   | 206Pb/238U concordant scans  | 24     | 31     |   |   |
| 306  | 99  | 3.10 | 0.24833  | 0.01602 | 0.03464 | 0.00104 | 0.05199 | 0.00328 | 0.26 | 225.22  | 13.07  | 12.99  | 219.55  | 6.46   | 6.45   | 284.83  | 147.52 | 141.10 | 219.55  | 6.46   | 6.45   | 206Pb/238U concordant scans  | 19     | 31     |   |   |
| 401  | 169 | 2.36 | 0.25143  | 0.01471 | 0.03510 | 0.00081 | 0.05196 | 0.00306 | 0.13 | 227.74  | 11.97  | 11.90  | 222.37  | 5.06   | 5.05   | 283.53  | 137.60 | 132.00 | 222.37  | 5.06   | 5.05   | 206Pb/238U concordant scans  | 23     | 31     |   |   |
| 701  | 319 | 2.20 | 0.24948  | 0.01338 | 0.03563 | 0.00103 | 0.05079 | 0.00249 | 0.41 | 226.15  | 10.90  | 10.84  | 225.67  | 6.42   | 6.41   | 231.10  | 115.45 | 111.50 | 225.67  | 6.42   | 6.41   | 206Pb/238U concordant scans  | 28     | 31     |   |   |
| 1115 | 399 | 2.80 | 0.51065  | 0.02068 | 0.06803 | 0.00163 | 0.05609 | 0.00201 | 0.46 | 418.89  | 13.95  | 13.85  | 412.20  | 9.87   | 9.86   | 455.88  | 80.57  | 78.59  | 412.20  | 9.87   | 9.86   | 206Pb/238U concordant scans  | 31     | 31     |   |   |
| 194  | 196 | 0.99 | 0.69413  | 0.04447 | 0.08667 | 0.00216 | 0.05808 | 0.00355 | 0.33 | 535.28  | 26.83  | 26.48  | 535.83  | 17.59  | 17.57  | 532.91  | 136.67 | 131.06 | 535.83  | 17.59  | 17.57  | 206Pb/238U concordant scans  | 25     | 31     |   |   |
| 443  | 180 | 2.46 | 0.91577  | 0.03740 | 0.10476 | 0.00285 | 0.06340 | 0.00227 | 0.48 | 660.12  | 19.92  | 19.73  | 642.27  | 16.67  | 16.64  | 721.58  | 77.04  | 75.20  | 642.27  | 16.67  | 16.64  | 206Pb/238U concordant scans  | 31     | 31     |   |   |
| 388  | 59  | 6.54 | 1.33440  | 0.05217 | 0.14263 | 0.00362 | 0.06740 | 0.00239 | 0.44 | 860.79  | 22.82  | 22.56  | 859.52  | 20.44  | 20.41  | 864.08  | 73.79  | 72.09  | 859.52  | 20.44  | 20.41  | 206Pb/238U concordant scans  | 31     | 31     |   |   |
| 146  | 73  | 2.00 | 1.53232  | 0.09777 | 0.15645 | 0.00457 | 0.07103 | 0.00444 | 0.24 | 943.43  | 39.58  | 38.83  | 937.02  | 25.50  | 25.45  | 958.42  | 130.43 | 125.18 | 937.02  | 25.50  | 25.45  | 206Pb/238U concordant scans  | 24     | 31     |   |   |
| 123  | 62  | 1.98 | 1.65308  | 0.06803 | 0.16618 | 0.00421 | 0.07214 | 0.00284 | 0.33 | 990.73  | 26.20  | 25.87  | 991.05  | 23.27  | 23.23  | 990.03  | 81.03  | 78.97  | 991.05  | 23.27  | 23.23  | 206Pb/238U concordant scans  | 25     | 31     |   |   |
| 285  | 148 | 1.92 | 2.25782  | 0.09115 | 0.20399 | 0.00543 | 0.08028 | 0.00273 | 0.54 | 1199.23 | 28.61  | 28.21  | 1196.70 | 29.13  | 29.06  | 1203.78 | 67.68  | 66.22  | 1199.23 | 28.61  | 28.21  | 207Pb/235U concordant scans  | 31     | 31     |   |   |
| 58   | 20  | 2.91 | 2.30052  | 0.15888 | 0.20591 | 0.01068 | 0.08103 | 0.00546 | 0.39 | 1212.45 | 49.48  | 48.30  | 1207.00 | 57.20  | 56.95  | 1222.16 | 135.26 | 129.54 | 1212.45 | 49.48  | 48.30  | 207Pb/235U concordant scans  | 24     | 31     |   |   |
| 136  | 27  | 5.06 | 3.88645  | 0.17906 | 0.26822 | 0.00787 | 0.10509 | 0.00439 | 0.44 | 1610.87 | 37.55  | 36.87  | 1531.77 | 40.05  | 39.93  | 1715.87 | 77.81  | 75.83  | 1610.87 | 37.55  | 36.87  | 207Pb/235U concordant scans  | 23     | 31     |   |   |
| 63   | 41  | 1.56 | 4.07235  | 0.30626 | 0.29440 | 0.01721 | 0.10032 | 0.00598 | 0.62 | 1648.78 | 62.25  | 60.40  | 1683.49 | 86.02  | 85.45  | 1630.09 | 112.92 | 108.82 | 1648.78 | 62.25  | 60.40  | 207Pb/235U concordant scans  | 24     | 31     |   |   |
| 276  | 177 | 1.56 | 4.42394  | 0.14750 | 0.30213 | 0.00635 | 0.10620 | 0.00338 | 0.31 | 1716.83 | 27.80  | 27.43  | 1701.87 | 31.46  | 31.38  | 1735.13 | 59.02  | 57.88  | 1716.83 | 27.80  | 27.43  | 207Pb/235U concordant scans  | 27     | 31     |   |   |
| 143  | 71  | 2.01 | 12.60808 | 0.39404 | 0.50362 | 0.01111 | 0.18157 | 0.00478 | 0.50 | 2650.82 | 29.62  | 29.19  | 2629.34 | 47.72  | 47.55  | 2667.26 | 43.91  | 43.25  | 2650.82 | 29.62  | 29.19  | 207Pb/235U concordant scans  | 28     | 31     |   |   |
| 44   | 18  | 2.45 | 11.79331 | 1.81482 | 0.45249 | 0.06982 | 0.18903 | 0.01310 | 0.94 | 2588.13 | 149.40 | 139.16 | 2406.32 | 313.67 | 306.22 | 2733.71 | 116.39 | 111.84 | 2733.71 | 116.39 | 111.84 | 207Pb/206Pb concordant scans | 5      | 31     |   |   |
| 0    | 0   | 0.00 | 0.00000  | 0.00000 | 0.00000 | 0.00000 | 0.00000 | 0.00000 | 0.00 | 0.00    | 0.00   | 0.00   | 0.00    | 0.00   | 0.00   | 0.00    | 0.00   | 0.00   | 0.00    | 0.00   | 0.00   | 0.00                         | failed | 0      | 0 |   |
| 0    | 0   | 0.00 | 0.00000  | 0.00000 | 0.00000 | 0.00000 | 0.00000 | 0.00000 | 0.00 | 0.00    | 0.00   | 0.00   | 0.00    | 0.00   | 0.00   | 0.00    | 0.00   | 0.00   | 0.00    | 0.00   | 0.00   | 0.00                         | 0.00   | failed | 0 | 0 |
| 0    | 0   | 0.00 | 0.00000  | 0.00000 | 0.00000 | 0.00000 | 0.00000 | 0.00000 | 0.00 | 0.00    | 0.00   | 0.00   | 0.00    | 0.00   | 0.00   | 0.00    | 0.00   | 0.00   | 0.00    | 0.00   | 0.00   | 0.00                         | 0.00   | failed | 0 | 0 |
| 0    | 0   | 0.00 | 0.00000  | 0.00000 | 0.00000 | 0.00000 | 0.00000 | 0.00000 | 0.00 | 0.00    | 0.00   | 0.00   | 0.00    | 0.00   | 0.00   | 0.00    | 0.00   | 0.00   | 0.00    | 0.00   | 0.00   | 0.00                         | 0.00   | failed | 0 | 0 |
| 0    | 0   | 0.00 | 0.00000  | 0.00000 | 0.00000 | 0.00000 | 0.00000 | 0.00000 | 0.00 | 0.00    | 0.00   | 0.00   | 0.00    | 0.00   | 0.00   | 0.00    | 0.00   | 0.00   | 0.00    | 0.00   | 0.00   | 0.00                         | 0.00   | failed | 0 | 0 |
| 0    | 0   | 0.00 | 0.00000  | 0.00000 | 0.00000 | 0.00000 | 0.00000 | 0.00000 | 0.00 | 0.00    | 0.00   | 0.00   | 0.00    | 0.00   | 0.00   | 0.00    | 0.00   | 0.00   | 0.00    | 0.00   | 0.00   | 0.00                         | 0.00   | failed | 0 | 0 |
| 0    | 0   | 0.00 | 0.00000  | 0.00000 | 0.00000 | 0.00000 | 0.00000 | 0.0     |      |         |        |        |         |        |        |         |        |        |         |        |        |                              |        |        |   |   |

## Data Repository Item E - U-Pb zircon analytical results from Cantwell Formation bentonites

| Mineral                   |     | Zircon              |            | Sample Name                       |                     | 011TC                  |                     | AZZ Name          |                    | 1413-05 |         |                    |         |         |                     |         |         |                    |         |         |          |            |                             |    |    |
|---------------------------|-----|---------------------|------------|-----------------------------------|---------------------|------------------------|---------------------|-------------------|--------------------|---------|---------|--------------------|---------|---------|---------------------|---------|---------|--------------------|---------|---------|----------|------------|-----------------------------|----|----|
| Analysis Name             |     | Uranium and Thorium |            | Concordant Scans: Isotopic Ratios |                     | Concordant Scans: Ages |                     | Preferred Age     |                    |         |         |                    |         |         |                     |         |         |                    |         |         |          |            |                             |    |    |
|                           |     | [U] (ppm)           | [Th] (ppm) | U/Th                              | 207Pb/235Uc 2 sigma | 206Pb/238U 2 sigma     | 207Pb/206Pb 2 sigma | Error Correlation | 207Pb/235U 2 sigma | 2-sigma | 2-sigma | 206Pb/238U 2-sigma | 2-sigma | 2-sigma | 207Pb/206Pb 2-sigma | 2-sigma | 2-sigma | Preferred Age (Ma) | 2-sigma | 2-sigma | Age Type | Concordant | Total Scans                 |    |    |
| P1413_005_Zrn_A_1_MBD_16  | 860 | 304                 | 2.83       | 0.06112                           | 0.00513             | 0.00892                | 0.00032             | 0.04972           | 0.00434            | 0.09    | 60.24   | 4.91               | 4.90    | 57.22   | 2.06                | 2.06    | 182.05  | 210.07             | 197.37  | 57.22   | 2.06     | 2.06       | 206Pb/238U concordant scans | 20 | 31 |
| P1413_005_Zrn_A_1_MBD_76  | 157 | 43                  | 3.69       | 0.06754                           | 0.02117             | 0.00976                | 0.00089             | 0.05021           | 0.01584            | 0.12    | 66.36   | 20.23              | 20.03   | 62.58   | 5.71                | 5.71    | 204.86  | 409.72             | 659.67  | 62.58   | 5.71     | 5.71       | 206Pb/238U concordant scans | 10 | 31 |
| P1413_005_Zrn_A_1_MBD_73  | 839 | 947                 | 0.89       | 0.06564                           | 0.00626             | 0.00994                | 0.00050             | 0.04789           | 0.00427            | 0.38    | 65.55   | 5.97               | 5.96    | 63.77   | 3.20                | 3.20    | 93.77   | 187.53             | 204.77  | 63.77   | 3.20     | 3.20       | 206Pb/238U concordant scans | 19 | 31 |
| P1413_005_Zrn_A_1_MBD_87  | 183 | 42                  | 4.34       | 0.06656                           | 0.01076             | 0.01006                | 0.00072             | 0.04799           | 0.00827            | 0.06    | 64.43   | 10.27              | 10.22   | 64.53   | 4.63                | 4.62    | 98.57   | 197.14             | 384.34  | 64.53   | 4.63     | 4.62       | 206Pb/238U concordant scans | 17 | 31 |
| P1413_005_Zrn_A_1_MBD_86  | 908 | 731                 | 1.24       | 0.07244                           | 0.00790             | 0.01012                | 0.00053             | 0.05189           | 0.00552            | 0.28    | 71.01   | 7.49               | 7.47    | 64.93   | 3.38                | 3.38    | 280.76  | 253.17             | 234.84  | 64.93   | 3.38     | 3.38       | 206Pb/238U concordant scans | 17 | 31 |
| P1413_005_Zrn_A_1_MBD_6   | 167 | 67                  | 2.50       | 0.06550                           | 0.01496             | 0.01013                | 0.00070             | 0.04688           | 0.01100            | 0.05    | 64.42   | 14.30              | 14.20   | 65.00   | 4.49                | 4.49    | 42.95   | 85.91              | 518.08  | 65.00   | 4.49     | 4.49       | 206Pb/238U concordant scans | 12 | 31 |
| P1413_005_Zrn_A_1_MBD_96  | 247 | 82                  | 3.03       | 0.07937                           | 0.02244             | 0.01015                | 0.00066             | 0.05671           | 0.01616            | 0.08    | 77.56   | 21.22              | 21.00   | 65.11   | 4.19                | 4.19    | 480.15  | 700.44             | 574.47  | 65.11   | 4.19     | 4.19       | 206Pb/238U concordant scans | 14 | 31 |
| P1413_005_Zrn_A_1_MBD_10  | 422 | 241                 | 1.75       | 0.06723                           | 0.00888             | 0.01015                | 0.00040             | 0.04802           | 0.00646            | 0.07    | 66.07   | 8.46               | 8.43    | 65.13   | 2.53                | 2.53    | 100.17  | 200.35             | 303.69  | 65.13   | 2.53     | 2.53       | 206Pb/238U concordant scans | 12 | 31 |
| P1413_005_Zrn_A_1_MBD_58  | 100 | 31                  | 3.19       | 0.07074                           | 0.01724             | 0.01018                | 0.00076             | 0.05038           | 0.01270            | 0.03    | 69.40   | 16.41              | 16.28   | 65.32   | 4.86                | 4.86    | 212.35  | 424.70             | 537.05  | 65.32   | 4.86     | 4.86       | 206Pb/238U concordant scans | 20 | 31 |
| P1413_005_Zrn_A_1_MBD_1   | 272 | 138                 | 1.98       | 0.07218                           | 0.01167             | 0.01023                | 0.00042             | 0.05117           | 0.00832            | 0.10    | 70.77   | 11.08              | 11.02   | 65.61   | 2.71                | 2.70    | 248.59  | 397.45             | 354.12  | 65.61   | 2.71     | 2.70       | 206Pb/238U concordant scans | 25 | 31 |
| P1413_005_Zrn_A_1_MBD_85  | 418 | 253                 | 1.65       | 0.07214                           | 0.00899             | 0.01026                | 0.00043             | 0.05100           | 0.00638            | 0.14    | 70.73   | 8.53               | 8.50    | 65.80   | 2.73                | 2.74    | 240.89  | 301.80             | 276.16  | 65.80   | 2.73     | 2.74       | 206Pb/238U concordant scans | 19 | 31 |
| P1413_005_Zrn_A_1_MBD_0   | 97  | 24                  | 4.13       | 0.07817                           | 0.01480             | 0.01032                | 0.00167             | 0.05491           | 0.07393            | 0.02    | 76.42   | 101.18             | 96.38   | 66.22   | 10.66               | 10.65   | 408.49  | 816.98             | 2112.49 | 66.22   | 10.66    | 10.65      | 206Pb/238U concordant scans | 4  | 31 |
| P1413_005_Zrn_A_1_MBD_19  | 430 | 274                 | 1.57       | 0.06925                           | 0.01071             | 0.01034                | 0.00044             | 0.04858           | 0.00748            | 0.14    | 67.99   | 10.20              | 10.15   | 66.31   | 2.79                | 2.79    | 127.53  | 255.06             | 343.76  | 66.31   | 2.79     | 2.79       | 206Pb/238U concordant scans | 19 | 31 |
| P1413_005_Zrn_A_1_MBD_92  | 202 | 76                  | 2.68       | 0.07406                           | 0.01666             | 0.01039                | 0.00057             | 0.05168           | 0.01180            | 0.05    | 72.54   | 15.81              | 15.69   | 66.65   | 3.64                | 3.64    | 271.34  | 542.68             | 484.88  | 66.65   | 3.64     | 3.64       | 206Pb/238U concordant scans | 15 | 31 |
| P1413_005_Zrn_A_1_MBD_110 | 143 | 51                  | 2.81       | 0.07456                           | 0.01369             | 0.01041                | 0.00062             | 0.05195           | 0.00988            | 0.04    | 73.02   | 12.98              | 12.89   | 66.76   | 3.98                | 3.98    | 283.17  | 466.97             | 408.14  | 66.76   | 3.98     | 3.98       | 206Pb/238U concordant scans | 21 | 31 |
| P1413_005_Zrn_A_1_MBD_75  | 383 | 176                 | 2.17       | 0.06838                           | 0.00671             | 0.01044                | 0.00040             | 0.04748           | 0.00463            | 0.20    | 67.16   | 6.39               | 6.37    | 66.98   | 2.52                | 2.52    | 73.67   | 147.33             | 223.94  | 66.98   | 2.52     | 2.52       | 206Pb/238U concordant scans | 21 | 31 |
| P1413_005_Zrn_A_1_MBD_119 | 236 | 98                  | 2.41       | 0.08383                           | 0.01612             | 0.01047                | 0.00060             | 0.05810           | 0.01113            | 0.16    | 81.74   | 15.16              | 15.05   | 67.11   | 3.85                | 3.85    | 533.41  | 449.38             | 393.85  | 67.11   | 3.85     | 3.85       | 206Pb/238U concordant scans | 19 | 31 |
| P1413_005_Zrn_A_1_MBD_83  | 163 | 54                  | 3.03       | 0.07328                           | 0.00950             | 0.01050                | 0.00078             | 0.05063           | 0.00703            | 0.15    | 71.81   | 9.01               | 8.97    | 67.32   | 5.00                | 5.00    | 224.12  | 337.90             | 306.11  | 67.32   | 5.00     | 5.00       | 206Pb/238U concordant scans | 15 | 31 |
| P1413_005_Zrn_A_1_MBD_17  | 301 | 105                 | 2.87       | 0.07251                           | 0.01305             | 0.01051                | 0.00052             | 0.05003           | 0.00913            | 0.08    | 71.08   | 12.39              | 12.32   | 67.42   | 3.33                | 3.33    | 196.17  | 392.34             | 398.70  | 67.42   | 3.33     | 3.33       | 206Pb/238U concordant scans | 14 | 31 |
| P1413_005_Zrn_A_1_MBD_48  | 404 | 155                 | 2.61       | 0.06753                           | 0.00978             | 0.01055                | 0.00053             | 0.04642           | 0.00681            | 0.13    | 66.35   | 9.32               | 9.28    | 67.66   | 3.40                | 3.40    | 19.43   | 38.86              | 334.83  | 67.66   | 3.40     | 3.40       | 206Pb/238U concordant scans | 14 | 31 |
| P1413_005_Zrn_A_1_MBD_116 | 118 | 58                  | 2.03       | 0.07807                           | 0.02003             | 0.01055                | 0.00068             | 0.05366           | 0.01393            | 0.08    | 76.33   | 18.96              | 18.78   | 67.67   | 4.36                | 4.36    | 356.69  | 646.19             | 538.22  | 67.67   | 4.36     | 4.36       | 206Pb/238U concordant scans | 18 | 31 |
| P1413_005_Zrn_A_1_MBD_52  | 445 | 301                 | 1.48       | 0.07530                           | 0.01027             | 0.01056                | 0.00048             | 0.05171           | 0.00720            | 0.09    | 73.72   | 9.72               | 9.67    | 67.73   | 3.06                | 3.06    | 272.47  | 335.88             | 304.36  | 67.73   | 3.06     | 3.06       | 206Pb/238U concordant scans | 22 | 31 |
| P1413_005_Zrn_A_1_MBD_64  | 297 | 181                 | 1.64       | 0.07640                           | 0.01259             | 0.01058                | 0.00041             | 0.05239           | 0.00878            | 0.03    | 74.76   | 11.91              | 11.84   | 67.82   | 2.62                | 2.62    | 302.60  | 406.30             | 360.98  | 67.82   | 2.62     | 2.62       | 206Pb/238U concordant scans | 21 | 31 |
| P1413_005_Zrn_A_1_MBD_45  | 334 | 147                 | 2.27       | 0.07939                           | 0.02169             | 0.01059                | 0.00054             | 0.05435           | 0.01495            | 0.05    | 77.57   | 20.51              | 20.30   | 67.94   | 3.44                | 3.44    | 385.49  | 685.49             | 565.00  | 67.94   | 3.44     | 3.44       | 206Pb/238U concordant scans | 16 | 31 |
| P1413_005_Zrn_A_1_MBD_114 | 173 | 53                  | 3.23       | 0.07305                           | 0.01258             | 0.01060                | 0.00079             | 0.04996           | 0.00909            | 0.07    | 71.59   | 11.94              | 11.87   | 68.00   | 5.02                | 5.01    | 193.19  | 386.38             | 397.53  | 68.00   | 5.02     | 5.01       | 206Pb/238U concordant scans | 12 | 31 |
| P1413_005_Zrn_A_1_MBD_60  | 472 | 258                 | 1.83       | 0.07057                           | 0.00692             | 0.01061                | 0.00041             | 0.04824           | 0.00485            | 0.11    | 69.24   | 6.57               | 6.55    | 68.04   | 2.61                | 2.60    | 110.89  | 221.78             | 228.98  | 68.04   | 2.61     | 2.60       | 206Pb/238U concordant scans | 19 | 31 |
| P1413_005_Zrn_A_1_MBD_95  | 179 | 47                  | 3.82       | 0.07377                           | 0.02188             | 0.01064                | 0.00075             | 0.05030           | 0.01496            | 0.10    | 72.27   | 20.79              | 20.58   | 68.21   | 4.76                | 4.76    | 208.73  | 417.46             | 625.14  | 68.21   | 4.76     | 4.76       | 206Pb/238U concordant scans | 14 | 31 |
| P1413_005_Zrn_A_1_MBD_105 | 179 | 46                  | 3.89       | 0.07195                           | 0.01179             | 0.01067                | 0.00044             | 0.04892           | 0.00813            | 0.05    | 70.55   | 11.20              | 11.14   | 68.41   | 2.83                | 2.83    | 143.87  | 287.74             | 368.46  | 68.41   | 2.83     | 2.83       | 206Pb/238U concordant scans | 22 | 31 |
| P1413_005_Zrn_A_1_MBD_31  | 222 | 93                  | 2.40       | 0.07747                           | 0.01362             | 0.01068                | 0.00040             | 0.05259           | 0.00927            | 0.08    | 75.76   | 12.87              | 12.79   | 68.50   | 2.58                | 2.58    | 311.32  | 428.23             | 378.16  | 68.50   | 2.58     | 2.58       | 206Pb/238U concordant scans | 23 | 31 |
| P1413_005_Zrn_A_1_MBD_41  | 622 | 508                 | 1.22       | 0.07334                           | 0.00784             | 0.01072                | 0.00036             | 0.04963           | 0.00525            | 0.18    | 71.86   | 7.43               | 7.41    | 68.72   | 2.30                | 2.30    | 177.77  | 256.24             | 237.59  | 68.72   | 2.30     | 2.30       | 206Pb/238U concordant scans | 19 | 31 |
| P1413_005_Zrn_A_1_MBD_65  | 222 | 66                  | 3.36       | 0.07846                           | 0.01060             | 0.01073                | 0.00044             | 0.05302           | 0.00731            | 0.07    | 76.70   | 10.00              | 9.95    | 68.82   | 2.83                | 2.82    | 329.64  | 328.86             | 298.48  | 68.82   | 2.83     | 2.82       | 206Pb/238U concordant scans | 17 | 31 |
| P1413_005_Zrn_A_1_MBD_46  | 308 | 314                 | 0.98       | 0.07551                           | 0.01378             | 0.01075                | 0.00046             | 0.05096           | 0.00927            | 0.12    | 73.91   | 13.05              | 12.97   | 68.91   | 2.96                | 2.96    | 239.02  | 449.11             | 394.57  | 68.91   | 2.96     | 2.96       | 206Pb/238U concordant scans | 17 | 31 |
| P1413_005_Zrn_A_1_MBD_67  | 256 | 89                  | 2.87       | 0.08129                           | 0.01565             | 0.01079                | 0.00056             | 0.05466           | 0.01076            | 0.04    | 79.36   | 14.75              | 14.65   | 69.17   | 3.57                | 3.57    | 398.27  | 474.58             | 413.53  | 69.17   | 3.57     | 3.57       | 206Pb/238U concordant scans | 14 | 31 |
| P1413_005_Zrn_A_1_MBD_111 | 275 | 126                 | 2.19       | 0.08300                           | 0.01210             | 0.01080                | 0.00036             | 0.05573           | 0.00817            | 0.07    | 80.96   | 11.38              | 11.31   | 69.26   | 2.32                | 2.32    | 441.64  | 343.82             | 310.53  | 69.26   | 2.32     | 2.32       | 206Pb/238U concordant scans | 25 | 31 |
| P1413_005_Zrn_A_1_MBD_29  | 188 | 68                  | 2.77       | 0.06994                           | 0.02022             | 0.01081                | 0.00099             | 0.04694           | 0.01328            | 0.22    | 68.64   | 19.28              | 19.10   | 69.29   | 6.29                | 6.29    | 46.04   | 92.08              | 614.64  | 69.29   | 6.29     | 6.29       | 206Pb/238U concordant scans | 13 | 31 |
| P1413_005_Zrn_A_1_MBD_99  | 189 | 65                  | 2.90       | 0.07706                           | 0.01441             | 0.01083                | 0.00064             | 0.05161           | 0.00972            | 0.13    | 75.38   | 13.63              | 13.54   | 69.44   | 4.05                | 4.05    | 268.06  | 463.31             | 405.39  | 69.44   | 4.05     | 4.05       | 206Pb/238U concordant scans | 18 | 31 |
| P1413_005_Zrn_A_1_MBD_98  | 312 | 108                 | 2.89       | 0.07349                           | 0.00577             | 0.01092                | 0.00052             | 0.04882           | 0.00368            | 0.36    | 72.01   | 5.46               | 5.45    | 70.00   | 3.34                | 3.34    | 139.03  | 182.03             | 172.44  | 70.00   | 3.34     | 3.34       | 206Pb/238U concordant scans | 13 | 31 |
| P1413_005_Zrn_A_1_MBD_74  | 270 | 81                  | 3.34       | 0.07777                           | 0.01310             | 0.01092                | 0.00063             | 0.05163           | 0.00886            | 0.11    | 76.05   | 12.38              | 12.30   | 70.04   | 4.04                | 4.04    | 269.19  | 419.13             | 371.16  | 70.04   | 4.04     | 4.04       | 206Pb/238U concordant scans | 18 | 31 |
| P1413_005_Zrn_A_1_MBD_88  | 209 | 92                  | 2.29       | 0.07599                           | 0.01396             | 0.01093                | 0.00051             | 0.05042           | 0.00925            | 0.13    | 74.37   | 13.22              | 13.13   | 70.09   | 3.28                | 3.28    | 214.24  | 428.47             | 399.47  | 70.09   | 3.28     | 3.28       | 206Pb/238U concordant scans | 15 | 31 |
| P1413_005_Zrn_A_1_MBD_7   | 322 | 131                 | 2.46       | 0.07637                           | 0.00914             | 0.01093                | 0.00063             | 0.05065           | 0.00621            | 0.18    | 74.73   | 8.64               | 8.60    | 70.11   | 4.03                | 4.03    | 225.06  | 296.44             | 271.69  | 70.11   | 4.03     | 4.03       | 206Pb/238U concordant scans | 14 | 31 |
| P1413_005_Zrn_A_1_MBD_101 | 196 | 95                  | 2.08       | 0.07830                           | 0.01620             | 0.01094                | 0.00060             | 0.05191           | 0.01086            | 0.08    | 76.54   | 15.32              | 15.20   | 70.14   | 3.81                | 3.80    | 281.42  | 517.74             | 446.40  | 70.14   | 3.81     | 3.80       | 206Pb/238U concordant scans | 20 | 31 |
| P1413_005_Zrn_A_1_MBD_28  | 205 | 87                  | 2.36       | 0.07411                           | 0.01183             | 0.01094                | 0.00041             | 0.04912           | 0.007              |         |         |                    |         |         |                     |         |         |                    |         |         |          |            |                             |    |    |

|                           |      |     |      |          |         |         |         |         |         |      |         |        |        |         |        |        |         |        |        |         |        |        |                             |    |    |
|---------------------------|------|-----|------|----------|---------|---------|---------|---------|---------|------|---------|--------|--------|---------|--------|--------|---------|--------|--------|---------|--------|--------|-----------------------------|----|----|
| P1413_005_Zrn_A_1_MBD_26  | 175  | 36  | 4.84 | 0.08995  | 0.01891 | 0.01225 | 0.00059 | 0.05328 | 0.01122 | 0.10 | 87.46   | 17.69  | 17.54  | 78.46   | 3.77   | 3.76   | 340.67  | 515.51 | 444.50 | 78.46   | 3.77   | 3.76   | 206Pb/238U concordant scans | 20 | 31 |
| P1413_005_Zrn_A_1_MBD_61  | 377  | 181 | 2.08 | 0.08153  | 0.02599 | 0.01230 | 0.00065 | 0.04807 | 0.01539 | 0.05 | 79.59   | 24.55  | 24.26  | 78.82   | 4.12   | 4.12   | 102.56  | 205.12 | 680.84 | 78.82   | 4.12   | 4.12   | 206Pb/238U concordant scans | 7  | 31 |
| P1413_005_Zrn_A_1_MBD_22  | 291  | 104 | 2.79 | 0.08845  | 0.01862 | 0.01358 | 0.00073 | 0.04723 | 0.01011 | 0.05 | 86.06   | 17.45  | 17.30  | 86.97   | 4.62   | 4.61   | 60.88   | 121.75 | 474.25 | 86.97   | 4.62   | 4.61   | 206Pb/238U concordant scans | 17 | 31 |
| P1413_005_Zrn_A_1_MBD_82  | 373  | 118 | 3.17 | 0.09393  | 0.01163 | 0.01424 | 0.00052 | 0.04785 | 0.00590 | 0.15 | 91.16   | 10.82  | 10.77  | 91.13   | 3.29   | 3.29   | 92.02   | 184.03 | 279.74 | 91.13   | 3.29   | 3.29   | 206Pb/238U concordant scans | 16 | 31 |
| P1413_005_Zrn_A_1_MBD_103 | 876  | 146 | 6.00 | 0.11026  | 0.00953 | 0.01589 | 0.00046 | 0.05034 | 0.00430 | 0.18 | 106.20  | 8.73   | 8.70   | 101.60  | 2.92   | 2.92   | 210.61  | 204.36 | 192.30 | 101.60  | 2.92   | 2.92   | 206Pb/238U concordant scans | 22 | 31 |
| P1413_005_Zrn_A_1_MBD_81  | 257  | 72  | 3.57 | 0.12540  | 0.03847 | 0.01603 | 0.00154 | 0.05673 | 0.01761 | 0.12 | 119.95  | 35.00  | 34.41  | 102.52  | 9.77   | 9.76   | 481.19  | 770.76 | 620.88 | 102.52  | 9.77   | 9.76   | 206Pb/238U concordant scans | 8  | 31 |
| P1413_005_Zrn_A_1_MBD_91  | 144  | 85  | 1.69 | 0.11189  | 0.01740 | 0.01676 | 0.00113 | 0.04843 | 0.00780 | 0.13 | 107.70  | 15.95  | 15.83  | 107.14  | 7.18   | 7.17   | 120.12  | 240.23 | 358.90 | 107.14  | 7.18   | 7.17   | 206Pb/238U concordant scans | 11 | 31 |
| P1413_005_Zrn_A_1_MBD_53  | 899  | 367 | 2.45 | 0.11947  | 0.00745 | 0.01747 | 0.00049 | 0.04960 | 0.00308 | 0.20 | 114.59  | 6.77   | 6.74   | 111.64  | 3.08   | 3.08   | 176.37  | 148.06 | 141.64 | 111.64  | 3.08   | 3.08   | 206Pb/238U concordant scans | 29 | 31 |
| P1413_005_Zrn_A_1_MBD_107 | 157  | 26  | 6.09 | 0.17412  | 0.03398 | 0.02507 | 0.00111 | 0.05037 | 0.00974 | 0.15 | 162.99  | 29.60  | 29.17  | 159.63  | 7.00   | 7.00   | 212.08  | 424.16 | 419.86 | 159.63  | 7.00   | 7.00   | 206Pb/238U concordant scans | 22 | 31 |
| P1413_005_Zrn_A_1_MBD_39  | 408  | 216 | 1.89 | 0.16776  | 0.01896 | 0.02527 | 0.00102 | 0.04815 | 0.00531 | 0.24 | 157.48  | 16.55  | 16.42  | 160.89  | 6.39   | 6.39   | 106.46  | 212.92 | 250.79 | 160.89  | 6.39   | 6.39   | 206Pb/238U concordant scans | 22 | 31 |
| P1413_005_Zrn_A_1_MBD_27  | 294  | 121 | 2.44 | 0.18998  | 0.02017 | 0.02598 | 0.00102 | 0.05303 | 0.00561 | 0.18 | 176.61  | 17.29  | 17.14  | 165.37  | 6.44   | 6.44   | 329.93  | 249.54 | 231.65 | 165.37  | 6.44   | 6.44   | 206Pb/238U concordant scans | 29 | 31 |
| P1413_005_Zrn_A_1_MBD_51  | 1075 | 506 | 2.12 | 0.17109  | 0.00813 | 0.02600 | 0.00065 | 0.04773 | 0.00220 | 0.28 | 160.36  | 7.06   | 7.04   | 165.45  | 4.11   | 4.11   | 85.84   | 111.36 | 107.71 | 165.45  | 4.11   | 4.11   | 206Pb/238U concordant scans | 26 | 31 |
| P1413_005_Zrn_A_1_MBD_40  | 377  | 144 | 2.61 | 0.18012  | 0.02002 | 0.02687 | 0.00138 | 0.04862 | 0.00561 | 0.13 | 168.17  | 17.30  | 17.15  | 170.93  | 8.67   | 8.66   | 129.42  | 258.85 | 260.63 | 170.93  | 8.67   | 8.66   | 206Pb/238U concordant scans | 22 | 31 |
| P1413_005_Zrn_A_1_MBD_117 | 207  | 70  | 2.97 | 0.18721  | 0.02199 | 0.02701 | 0.00101 | 0.05026 | 0.00597 | 0.11 | 174.25  | 18.90  | 18.72  | 171.83  | 6.33   | 6.33   | 207.16  | 287.81 | 264.45 | 171.83  | 6.33   | 6.33   | 206Pb/238U concordant scans | 17 | 31 |
| P1413_005_Zrn_A_1_MBD_112 | 72   | 18  | 4.01 | 0.21137  | 0.04005 | 0.02724 | 0.00105 | 0.05627 | 0.01071 | 0.07 | 194.70  | 33.85  | 33.30  | 173.26  | 6.57   | 6.57   | 463.17  | 451.95 | 396.05 | 173.26  | 6.57   | 6.57   | 206Pb/238U concordant scans | 26 | 31 |
| P1413_005_Zrn_A_1_MBD_84  | 553  | 246 | 2.25 | 0.20080  | 0.01516 | 0.02805 | 0.00106 | 0.05192 | 0.00266 | 0.37 | 185.80  | 12.86  | 12.78  | 178.35  | 6.68   | 6.67   | 281.67  | 165.58 | 157.54 | 178.35  | 6.68   | 6.67   | 206Pb/238U concordant scans | 24 | 31 |
| P1413_005_Zrn_A_1_MBD_36  | 377  | 142 | 2.65 | 0.20770  | 0.01886 | 0.02971 | 0.00107 | 0.05070 | 0.00447 | 0.26 | 191.62  | 15.92  | 15.80  | 188.75  | 6.72   | 6.72   | 227.20  | 210.41 | 197.63 | 188.75  | 6.72   | 6.72   | 206Pb/238U concordant scans | 19 | 31 |
| P1413_005_Zrn_A_1_MBD_18  | 540  | 206 | 2.62 | 0.20959  | 0.01479 | 0.02989 | 0.00087 | 0.05085 | 0.00263 | 0.15 | 193.21  | 12.45  | 12.38  | 189.88  | 5.47   | 5.47   | 234.01  | 168.88 | 160.55 | 189.88  | 5.47   | 5.47   | 206Pb/238U concordant scans | 16 | 31 |
| P1413_005_Zrn_A_1_MBD_79  | 181  | 66  | 2.75 | 0.21257  | 0.02409 | 0.03001 | 0.00100 | 0.05137 | 0.00584 | 0.12 | 195.70  | 20.27  | 20.07  | 190.61  | 6.29   | 6.28   | 257.55  | 272.40 | 251.32 | 190.61  | 6.29   | 6.28   | 206Pb/238U concordant scans | 25 | 31 |
| P1413_005_Zrn_A_1_MBD_70  | 340  | 100 | 3.39 | 0.22027  | 0.02376 | 0.03003 | 0.00118 | 0.05321 | 0.00573 | 0.18 | 202.14  | 19.87  | 19.68  | 190.71  | 7.41   | 7.41   | 337.57  | 253.53 | 235.08 | 190.71  | 7.41   | 7.41   | 206Pb/238U concordant scans | 20 | 31 |
| P1413_005_Zrn_A_1_MBD_57  | 113  | 35  | 3.20 | 0.20287  | 0.03988 | 0.03041 | 0.00176 | 0.04839 | 0.00969 | 0.08 | 187.55  | 33.94  | 33.38  | 193.09  | 11.03  | 11.02  | 118.40  | 236.81 | 440.78 | 193.09  | 11.03  | 11.02  | 206Pb/238U concordant scans | 13 | 31 |
| P1413_005_Zrn_A_1_MBD_77  | 913  | 428 | 2.13 | 0.27477  | 0.01477 | 0.03978 | 0.00116 | 0.05009 | 0.00256 | 0.34 | 246.50  | 11.80  | 11.73  | 251.49  | 7.19   | 7.18   | 199.31  | 120.81 | 116.49 | 251.49  | 7.19   | 7.18   | 206Pb/238U concordant scans | 27 | 31 |
| P1413_005_Zrn_A_1_MBD_14  | 628  | 163 | 3.85 | 0.28069  | 0.01496 | 0.03992 | 0.00090 | 0.05100 | 0.00272 | 0.15 | 251.20  | 11.89  | 11.82  | 252.31  | 5.57   | 5.56   | 240.90  | 125.27 | 120.63 | 252.31  | 5.57   | 5.56   | 206Pb/238U concordant scans | 23 | 31 |
| P1413_005_Zrn_A_1_MBD_50  | 802  | 221 | 3.62 | 0.39015  | 0.02162 | 0.05207 | 0.00157 | 0.05434 | 0.00268 | 0.46 | 334.48  | 15.85  | 15.73  | 327.22  | 9.61   | 9.60   | 385.24  | 112.64 | 108.84 | 327.22  | 9.61   | 9.60   | 206Pb/238U concordant scans | 28 | 31 |
| P1413_005_Zrn_A_1_MBD_104 | 857  | 468 | 1.83 | 0.38881  | 0.01735 | 0.05261 | 0.00119 | 0.05360 | 0.00233 | 0.25 | 333.50  | 12.72  | 12.65  | 330.52  | 7.26   | 7.26   | 354.33  | 99.61  | 96.63  | 330.52  | 7.26   | 7.26   | 206Pb/238U concordant scans | 28 | 31 |
| P1413_005_Zrn_A_1_MBD_66  | 560  | 350 | 1.60 | 0.40031  | 0.02171 | 0.05296 | 0.00124 | 0.05482 | 0.00287 | 0.27 | 341.87  | 15.81  | 15.68  | 332.69  | 7.57   | 7.56   | 404.76  | 119.23 | 114.97 | 332.69  | 7.57   | 7.56   | 206Pb/238U concordant scans | 23 | 31 |
| P1413_005_Zrn_A_1_MBD_9   | 134  | 54  | 2.48 | 0.39306  | 0.04814 | 0.05398 | 0.00172 | 0.05281 | 0.00641 | 0.16 | 336.60  | 35.39  | 34.79  | 338.90  | 10.55  | 10.54  | 320.78  | 288.04 | 264.48 | 338.90  | 10.55  | 10.54  | 206Pb/238U concordant scans | 22 | 31 |
| P1413_005_Zrn_A_1_MBD_43  | 94   | 98  | 0.96 | 0.59218  | 0.07225 | 0.07557 | 0.00254 | 0.05684 | 0.00693 | 0.13 | 472.26  | 46.61  | 45.56  | 469.60  | 15.22  | 15.20  | 485.21  | 280.94 | 258.26 | 469.60  | 15.22  | 15.20  | 206Pb/238U concordant scans | 31 | 31 |
| P1413_005_Zrn_A_1_MBD_89  | 126  | 51  | 2.48 | 1.60745  | 0.07515 | 0.15794 | 0.00517 | 0.07381 | 0.00334 | 0.36 | 973.12  | 29.48  | 29.06  | 945.32  | 28.79  | 28.73  | 1036.41 | 92.63  | 89.94  | 973.12  | 29.48  | 29.06  | 207Pb/235U concordant scans | 20 | 31 |
| P1413_005_Zrn_A_1_MBD_68  | 130  | 115 | 1.14 | 2.67510  | 0.16700 | 0.21833 | 0.00741 | 0.08887 | 0.00501 | 0.43 | 1321.60 | 46.67  | 45.62  | 1273.03 | 39.29  | 39.17  | 1401.26 | 109.94 | 106.10 | 1273.03 | 39.29  | 39.17  | 206Pb/238U concordant scans | 21 | 31 |
| P1413_005_Zrn_A_1_MBD_55  | 296  | 118 | 2.50 | 2.93059  | 0.10935 | 0.23802 | 0.00556 | 0.08930 | 0.00292 | 0.48 | 1389.85 | 28.45  | 28.05  | 1376.42 | 29.00  | 28.93  | 1410.52 | 63.15  | 61.86  | 1389.85 | 28.45  | 28.05  | 207Pb/235U concordant scans | 29 | 31 |
| P1413_005_Zrn_A_1_MBD_54  | 110  | 95  | 1.16 | 2.69911  | 0.70877 | 0.21160 | 0.05250 | 0.09252 | 0.00952 | 0.92 | 1328.21 | 204.52 | 185.79 | 1237.31 | 282.40 | 276.35 | 1477.98 | 201.75 | 189.12 | 1477.98 | 201.75 | 189.12 | 207Pb/235U concordant scans | 4  | 31 |
| P1413_005_Zrn_A_1_MBD_72  | 257  | 108 | 2.38 | 3.44369  | 0.14282 | 0.25474 | 0.00753 | 0.09804 | 0.00335 | 0.57 | 1514.43 | 32.90  | 32.37  | 1462.88 | 38.77  | 38.65  | 1587.27 | 64.61  | 63.25  | 1514.43 | 32.90  | 32.37  | 207Pb/235U concordant scans | 19 | 31 |
| P1413_005_Zrn_A_1_MBD_93  | 83   | 24  | 3.44 | 4.15671  | 0.19682 | 0.29751 | 0.01179 | 0.10133 | 0.00326 | 0.73 | 1665.53 | 39.13  | 38.39  | 1678.97 | 58.68  | 58.42  | 1648.64 | 60.33  | 59.14  | 1665.53 | 39.13  | 38.39  | 207Pb/235U concordant scans | 26 | 31 |
| P1413_005_Zrn_A_1_MBD_78  | 174  | 133 | 1.31 | 4.37079  | 0.18797 | 0.30022 | 0.01096 | 0.10559 | 0.00310 | 0.73 | 1706.83 | 35.85  | 35.23  | 1692.39 | 54.47  | 54.24  | 1724.61 | 54.41  | 53.44  | 1706.83 | 35.85  | 35.23  | 207Pb/235U concordant scans | 23 | 31 |
| P1413_005_Zrn_A_1_MBD_59  | 142  | 50  | 2.84 | 4.58775  | 0.32272 | 0.30885 | 0.01954 | 0.10773 | 0.00432 | 0.82 | 1747.04 | 59.51  | 57.81  | 1735.04 | 96.62  | 95.90  | 1761.45 | 74.25  | 72.45  | 1747.04 | 59.51  | 57.81  | 207Pb/235U concordant scans | 14 | 31 |
| P1413_005_Zrn_A_1_MBD_80  | 68   | 44  | 1.53 | 4.99694  | 0.24579 | 0.32541 | 0.01082 | 0.11137 | 0.00448 | 0.58 | 1818.81 | 42.05  | 41.20  | 1816.09 | 52.73  | 52.52  | 1821.91 | 73.84  | 72.05  | 1818.81 | 42.05  | 41.20  | 207Pb/235U concordant scans | 27 | 31 |
| P1413_005_Zrn_A_1_MBD_11  | 103  | 113 | 0.91 | 5.91346  | 0.22445 | 0.35114 | 0.00882 | 0.12214 | 0.00408 | 0.48 | 1963.21 | 33.24  | 32.70  | 1940.02 | 42.14  | 42.00  | 1987.75 | 59.98  | 58.79  | 1963.21 | 33.24  | 32.70  | 207Pb/235U concordant scans | 27 | 31 |
| P1413_005_Zrn_A_1_MBD_49  | 117  | 91  | 1.29 | 11.85016 | 0.53925 | 0.47518 | 0.01843 | 0.18087 | 0.00542 | 0.75 | 2592.64 | 43.06  | 42.17  | 2506.22 | 80.79  | 80.29  | 2660.87 | 50.07  | 49.21  | 2592.64 | 43.06  | 42.17  | 207Pb/235U concordant scans | 28 | 31 |
| P1413_005_Zrn_A_1_MBD_34  | 0    | 0   | 0.00 | 0.00000  | 0.00000 | 0.00000 | 0.00000 | 0.00000 | 0.00000 | 0.00 | 0.00    | 0.00   | 0.00   | 0.00    | 0.00   | 0.00   | 0.00    | 0.00   | 0.00   | 0.00    | 0.00   | 0.00   | failed                      | 0  | 0  |
| P1413_005_Zrn_A_1_MBD_42  | 0    | 0   | 0.00 | 0.00000  | 0.00000 | 0.00000 | 0.00000 | 0.00000 | 0.00000 | 0.00 | 0.00    | 0.00   | 0.00   | 0.00    | 0.00   | 0.00   | 0.00    | 0.00   | 0.00   | 0.00    | 0.00   | 0.00   | failed                      | 0  | 0  |
| P1413_005_Zrn_A_1_MBD_63  | 0    | 0   | 0.00 | 0.00000  | 0.00000 | 0.00000 | 0.00000 | 0.00000 | 0.00000 | 0.00 | 0.00    | 0.00   | 0.00   | 0.00    | 0.00   | 0.00   | 0.00    | 0.00   | 0.00   | 0.00    | 0.00   | 0.00   | failed                      | 0  | 0  |
| P1413_005_Zrn_A_1_MBD_69  | 0    | 0   | 0.00 | 0.00000  | 0.00000 | 0.00000 | 0.00000 | 0.00000 | 0.00000 | 0.00 | 0.00    | 0.00   | 0.00   | 0.00    | 0.00   | 0.00   | 0.00    | 0.00   | 0.00   | 0.00    | 0.00   | 0.00   | failed                      | 0  | 0  |
| P1413_005_Zrn_A_1_MBD_90  | 0    | 0   | 0.00 | 0.00000  |         |         |         |         |         |      |         |        |        |         |        |        |         |        |        |         |        |        |                             |    |    |

|             |        |
|-------------|--------|
| Mineral     | Zircon |
| Sample Name | 03LTC  |
| A2Z Name    | 024-31 |

| Analysis name | Urarium and Thorium |      |      |         |         | Concordant Scans: Isotopic Ratios |         |            |         |             |         |       |             |            |          | Concordant Scans: Ages |            |          |         |             |          |         |                             |          |         | Preferred Age |  |  | Age Type | Concordant | Total Scans |
|---------------|---------------------|------|------|---------|---------|-----------------------------------|---------|------------|---------|-------------|---------|-------|-------------|------------|----------|------------------------|------------|----------|---------|-------------|----------|---------|-----------------------------|----------|---------|---------------|--|--|----------|------------|-------------|
|               | [U]                 | [Pb] | [Th] | [ThPm]  | [U/Th]  | 207Pb/235U                        | 2-sigma | 206Pb/238U | 2-sigma | 207Pb/206Pb | 2-sigma | Error | Correlation | 207Pb/235U | -2-sigma | 2-sigma                | 206Pb/238U | -2-sigma | 2-sigma | 207Pb/206Pb | -2-sigma | 2-sigma | Preferred Age (Ma)          | -2-sigma | 2-sigma |               |  |  |          |            |             |
| 02431A121_103 | 158                 | 85   | 1.86 | 0.06927 | 0.01293 | 0.01013                           | 0.00037 | 0.04958    | 0.00941 | 0.01        | 68.00   | 12.31 | 12.24       | 64.99      | 2.39     | 2.39                   | 175.23     | 350.47   | 415.12  | 64.99       | 2.39     | 2.39    | 206Pb/238U concordant scans | 90       | 177     |               |  |  |          |            |             |
| 02431A121_107 | 358                 | 157  | 2.28 | 0.06980 | 0.00992 | 0.01028                           | 0.00036 | 0.04924    | 0.00716 | 0.01        | 68.51   | 9.43  | 9.39        | 65.93      | 2.27     | 2.27                   | 159.39     | 318.78   | 323.74  | 65.93       | 2.27     | 2.27    | 206Pb/238U concordant scans | 53       | 177     |               |  |  |          |            |             |
| 02431A121_20  | 814                 | 464  | 1.75 | 0.06887 | 0.00451 | 0.01032                           | 0.00023 | 0.04841    | 0.00327 | 0.07        | 67.63   | 4.35  | 4.34        | 66.17      | 1.47     | 1.46                   | 119.38     | 163.42   | 155.66  | 66.17       | 1.47     | 1.46    | 206Pb/238U concordant scans | 99       | 177     |               |  |  |          |            |             |
| 02431A121_36  | 544                 | 230  | 1.37 | 0.07018 | 0.00621 | 0.01032                           | 0.00023 | 0.04931    | 0.00442 | 0.04        | 68.87   | 5.90  | 5.88        | 66.21      | 1.46     | 1.46                   | 162.37     | 216.81   | 203.32  | 66.21       | 1.46     | 1.46    | 206Pb/238U concordant scans | 77       | 177     |               |  |  |          |            |             |
| 02431A121_13  | 816                 | 326  | 2.51 | 0.06998 | 0.00553 | 0.01035                           | 0.00025 | 0.04905    | 0.00395 | 0.06        | 68.68   | 5.25  | 5.24        | 66.36      | 1.59     | 1.59                   | 150.25     | 194.24   | 183.35  | 66.36       | 1.59     | 1.59    | 206Pb/238U concordant scans | 71       | 177     |               |  |  |          |            |             |
| 02431A121_64  | 702                 | 302  | 2.33 | 0.06949 | 0.00587 | 0.01035                           | 0.00026 | 0.04870    | 0.00418 | 0.07        | 68.22   | 5.58  | 5.57        | 66.38      | 1.65     | 1.65                   | 133.18     | 208.34   | 195.88  | 66.38       | 1.65     | 1.65    | 206Pb/238U concordant scans | 83       | 177     |               |  |  |          |            |             |
| 02431A121_81  | 351                 | 259  | 1.35 | 0.07122 | 0.00761 | 0.01037                           | 0.00031 | 0.04979    | 0.00546 | 0.03        | 69.85   | 7.22  | 7.20        | 66.53      | 1.95     | 1.95                   | 185.18     | 265.81   | 245.79  | 66.53       | 1.95     | 1.95    | 206Pb/238U concordant scans | 77       | 177     |               |  |  |          |            |             |
| 02431A121_39  | 351                 | 123  | 2.86 | 0.07047 | 0.00851 | 0.01039                           | 0.00031 | 0.04991    | 0.00606 | 0.03        | 70.10   | 8.08  | 8.05        | 66.61      | 1.97     | 1.97                   | 190.74     | 295.31   | 270.79  | 66.61       | 1.97     | 1.97    | 206Pb/238U concordant scans | 67       | 177     |               |  |  |          |            |             |
| 02431A121_78  | 563                 | 748  | 0.75 | 0.07062 | 0.00691 | 0.01040                           | 0.00029 | 0.04923    | 0.00495 | 0.03        | 69.28   | 6.57  | 6.55        | 66.71      | 1.86     | 1.86                   | 158.94     | 244.14   | 227.18  | 66.71       | 1.86     | 1.86    | 206Pb/238U concordant scans | 91       | 177     |               |  |  |          |            |             |
| 02431A121_15  | 1513                | 1907 | 0.79 | 0.06940 | 0.00358 | 0.01042                           | 0.00029 | 0.04830    | 0.00253 | 0.21        | 68.13   | 3.40  | 3.39        | 66.83      | 1.87     | 1.86                   | 113.97     | 126.05   | 121.39  | 66.83       | 1.87     | 1.86    | 206Pb/238U concordant scans | 74       | 177     |               |  |  |          |            |             |
| 02431A121_27  | 774                 | 360  | 2.15 | 0.07073 | 0.00530 | 0.01043                           | 0.00024 | 0.04920    | 0.00378 | 0.04        | 69.39   | 5.03  | 5.02        | 66.86      | 1.52     | 1.52                   | 157.53     | 184.68   | 174.81  | 66.86       | 1.52     | 1.52    | 206Pb/238U concordant scans | 85       | 177     |               |  |  |          |            |             |
| 02431A121_7   | 1007                | 549  | 1.83 | 0.07069 | 0.00872 | 0.01043                           | 0.00031 | 0.04916    | 0.00615 | 0.05        | 69.35   | 8.29  | 8.26        | 66.88      | 2.00     | 2.00                   | 155.57     | 306.57   | 280.29  | 66.88       | 2.00     | 2.00    | 206Pb/238U concordant scans | 49       | 177     |               |  |  |          |            |             |
| 02431A121_108 | 590                 | 252  | 2.34 | 0.07050 | 0.00568 | 0.01043                           | 0.00022 | 0.04901    | 0.00403 | 0.02        | 69.18   | 5.40  | 5.38        | 66.91      | 1.41     | 1.41                   | 148.33     | 198.81   | 187.42  | 66.91       | 1.41     | 1.41    | 206Pb/238U concordant scans | 89       | 177     |               |  |  |          |            |             |
| 02431A121_37  | 548                 | 257  | 2.14 | 0.06931 | 0.00577 | 0.01044                           | 0.00027 | 0.04815    | 0.00412 | 0.05        | 68.05   | 5.49  | 5.47        | 66.95      | 1.73     | 1.72                   | 106.64     | 208.40   | 195.96  | 66.95       | 1.73     | 1.72    | 206Pb/238U concordant scans | 68       | 177     |               |  |  |          |            |             |
| 02431A121_105 | 619                 | 330  | 1.88 | 0.07016 | 0.00695 | 0.01045                           | 0.00025 | 0.04871    | 0.00492 | 0.02        | 68.85   | 6.60  | 6.58        | 66.99      | 1.63     | 1.63                   | 133.91     | 246.31   | 229.08  | 66.99       | 1.63     | 1.63    | 206Pb/238U concordant scans | 70       | 177     |               |  |  |          |            |             |
| 02431A121_40  | 830                 | 390  | 2.13 | 0.07101 | 0.00679 | 0.01045                           | 0.00027 | 0.04927    | 0.00478 | 0.06        | 69.66   | 6.45  | 6.43        | 67.03      | 1.74     | 1.74                   | 160.74     | 235.28   | 219.48  | 67.03       | 1.74     | 1.74    | 206Pb/238U concordant scans | 79       | 177     |               |  |  |          |            |             |
| 02431A121_72  | 550                 | 255  | 2.16 | 0.07106 | 0.00576 | 0.01046                           | 0.00024 | 0.04929    | 0.00409 | 0.03        | 69.71   | 5.46  | 5.45        | 67.05      | 1.56     | 1.56                   | 161.83     | 200.05   | 188.51  | 67.05       | 1.56     | 1.56    | 206Pb/238U concordant scans | 73       | 177     |               |  |  |          |            |             |
| 02431A121_41  | 895                 | 231  | 3.87 | 0.07042 | 0.00524 | 0.01046                           | 0.00022 | 0.04885    | 0.00370 | 0.05        | 69.09   | 4.98  | 4.97        | 67.05      | 1.40     | 1.40                   | 140.40     | 182.65   | 173.00  | 67.05       | 1.40     | 1.40    | 206Pb/238U concordant scans | 87       | 177     |               |  |  |          |            |             |
| 02431A121_104 | 797                 | 324  | 2.46 | 0.07167 | 0.00524 | 0.01046                           | 0.00023 | 0.04970    | 0.00372 | 0.05        | 70.28   | 4.97  | 4.96        | 67.06      | 1.49     | 1.49                   | 181.07     | 179.30   | 169.96  | 67.06       | 1.49     | 1.49    | 206Pb/238U concordant scans | 70       | 177     |               |  |  |          |            |             |
| 02431A121_60  | 266                 | 218  | 1.22 | 0.07043 | 0.00860 | 0.01046                           | 0.00037 | 0.04882    | 0.00614 | 0.03        | 69.11   | 8.18  | 8.14        | 67.10      | 2.36     | 2.36                   | 138.97     | 277.94   | 282.73  | 67.10       | 2.36     | 2.36    | 206Pb/238U concordant scans | 67       | 177     |               |  |  |          |            |             |
| 02431A121_63  | 988                 | 537  | 1.84 | 0.07011 | 0.00474 | 0.01047                           | 0.00026 | 0.04858    | 0.00333 | 0.12        | 68.80   | 4.51  | 4.50        | 67.12      | 1.67     | 1.67                   | 127.63     | 165.65   | 157.68  | 67.12       | 1.67     | 1.67    | 206Pb/238U concordant scans | 66       | 177     |               |  |  |          |            |             |
| 02431A121_110 | 710                 | 524  | 1.36 | 0.07167 | 0.00616 | 0.01048                           | 0.00025 | 0.04962    | 0.00432 | 0.07        | 70.28   | 5.85  | 5.83        | 67.18      | 1.58     | 1.58                   | 177.09     | 209.69   | 197.04  | 67.18       | 1.58     | 1.58    | 206Pb/238U concordant scans | 77       | 177     |               |  |  |          |            |             |
| 02431A121_67  | 332                 | 101  | 3.28 | 0.07085 | 0.00865 | 0.01048                           | 0.00034 | 0.04901    | 0.00614 | 0.02        | 69.50   | 8.22  | 8.18        | 67.23      | 2.20     | 2.20                   | 148.50     | 296.99   | 281.32  | 67.23       | 2.20     | 2.20    | 206Pb/238U concordant scans | 67       | 177     |               |  |  |          |            |             |
| 02431A121_23  | 609                 | 217  | 2.80 | 0.07195 | 0.00640 | 0.01049                           | 0.00026 | 0.04975    | 0.00451 | 0.04        | 70.55   | 6.07  | 6.05        | 67.26      | 1.66     | 1.66                   | 183.35     | 218.17   | 204.50  | 67.26       | 1.66     | 1.66    | 206Pb/238U concordant scans | 77       | 177     |               |  |  |          |            |             |
| 02431A121_109 | 428                 | 219  | 1.96 | 0.07043 | 0.00961 | 0.01049                           | 0.00030 | 0.04869    | 0.00673 | 0.03        | 69.11   | 9.14  | 9.10        | 67.28      | 1.90     | 1.90                   | 132.75     | 265.51   | 309.83  | 67.28       | 1.90     | 1.90    | 206Pb/238U concordant scans | 82       | 177     |               |  |  |          |            |             |
| 02431A121_25  | 486                 | 179  | 2.71 | 0.07109 | 0.00629 | 0.01049                           | 0.00026 | 0.04914    | 0.00444 | 0.03        | 69.73   | 5.97  | 5.95        | 67.28      | 1.65     | 1.65                   | 154.59     | 218.93   | 205.19  | 67.28       | 1.65     | 1.65    | 206Pb/238U concordant scans | 80       | 177     |               |  |  |          |            |             |
| 02431A121_28  | 466                 | 163  | 2.85 | 0.07138 | 0.00583 | 0.01049                           | 0.00026 | 0.04934    | 0.00414 | 0.03        | 70.01   | 5.53  | 5.51        | 67.29      | 1.66     | 1.66                   | 163.90     | 202.23   | 190.45  | 67.29       | 1.66     | 1.66    | 206Pb/238U concordant scans | 94       | 177     |               |  |  |          |            |             |
| 02431A121_89  | 434                 | 166  | 2.62 | 0.07222 | 0.00662 | 0.01049                           | 0.00026 | 0.04991    | 0.00468 | 0.04        | 70.80   | 6.28  | 6.26        | 67.30      | 1.69     | 1.69                   | 190.83     | 225.48   | 210.91  | 67.30       | 1.69     | 1.69    | 206Pb/238U concordant scans | 85       | 177     |               |  |  |          |            |             |
| 02431A121_82  | 603                 | 242  | 2.49 | 0.07081 | 0.00617 | 0.01050                           | 0.00024 | 0.04892    | 0.00433 | 0.04        | 69.47   | 5.85  | 5.84        | 67.33      | 1.50     | 1.50                   | 143.84     | 214.65   | 201.44  | 67.33       | 1.50     | 1.50    | 206Pb/238U concordant scans | 75       | 177     |               |  |  |          |            |             |
| 02431A121_66  | 423                 | 226  | 1.87 | 0.07120 | 0.00741 | 0.01050                           | 0.00028 | 0.04919    | 0.00521 | 0.04        | 69.84   | 7.03  | 7.01        | 67.33      | 1.80     | 1.80                   | 156.68     | 257.73   | 238.90  | 67.33       | 1.80     | 1.80    | 206Pb/238U concordant scans | 77       | 177     |               |  |  |          |            |             |
| 02431A121_52  | 890                 | 308  | 2.89 | 0.07126 | 0.00495 | 0.01051                           | 0.00025 | 0.04919    | 0.00348 | 0.09        | 69.89   | 4.70  | 4.69        | 67.38      | 1.59     | 1.59                   | 156.92     | 169.95   | 161.56  | 67.38       | 1.59     | 1.59    | 206Pb/238U concordant scans | 85       | 177     |               |  |  |          |            |             |
| 02431A121_92  | 400                 | 146  | 2.74 | 0.07206 | 0.00813 | 0.01051                           | 0.00035 | 0.04974    | 0.00577 | 0.04        | 70.65   | 7.72  | 7.69        | 67.38      | 2.26     | 2.26                   | 182.77     | 282.02   | 259.59  | 67.38       | 2.26     | 2.26    | 206Pb/238U concordant scans | 63       | 177     |               |  |  |          |            |             |
| 02431A121_62  | 730                 | 394  | 1.85 | 0.07052 | 0.00638 | 0.01051                           | 0.00028 | 0.04866    | 0.00448 | 0.07        | 69.19   | 6.06  | 6.04        | 67.41      | 1.79     | 1.79                   | 131.37     | 223.88   | 209.56  | 67.41       | 1.79     | 1.79    | 206Pb/238U concordant scans | 73       | 177     |               |  |  |          |            |             |
| 02431A121_70  | 422                 | 269  | 1.57 | 0.07138 | 0.00752 | 0.01052                           | 0.00030 | 0.04919    | 0.00532 | 0.02        | 70.01   | 7.14  | 7.12        | 67.49      | 1.92     | 1.92                   | 157.02     | 263.39   | 243.76  | 67.49       | 1.92     | 1.92    | 206Pb/238U concordant scans | 74       | 177     |               |  |  |          |            |             |
| 02431A121_34  | 592                 | 988  | 0.60 | 0.06974 | 0.00600 | 0.01053                           | 0.00027 | 0.04804    | 0.00423 | 0.05        | 68.46   | 5.70  | 5.68        | 67.52      | 1.75     | 1.75                   | 101.40     | 202.80   | 201.90  | 67.52       | 1.75     | 1.75    | 206Pb/238U concordant scans | 74       | 177     |               |  |  |          |            |             |
| 02431A121_99  | 1293                | 637  | 2.03 | 0.07008 | 0.00409 | 0.01054                           | 0.00021 | 0.04822    | 0.00286 | 0.10        | 68.77   | 3.89  | 3.88        | 67.59      | 1.34     | 1.34                   | 110.12     | 142.94   | 136.97  | 67.59       | 1.34     | 1.34    | 206Pb/238U concordant scans | 93       | 177     |               |  |  |          |            |             |
| 02431A121_90  | 535                 | 218  | 2.45 | 0.07252 | 0.00561 | 0.01055                           | 0.00027 | 0.04990    | 0.00398 | 0.05        | 71.12   | 5.32  | 5.31        | 67.63      | 1.70     | 1.70                   | 190.13     | 190.89   | 180.34  | 67.63       | 1.70     | 1.70    | 206Pb/238U concordant scans | 85       | 177     |               |  |  |          |            |             |
| 02431A121_93  | 1040                | 1185 | 0.88 | 0.07096 | 0.00501 | 0.01056                           | 0.00028 | 0.04870    | 0.00353 | 0.10        | 69.57   | 4.76  | 4.75        | 67.73      | 1.79     | 1.79                   | 133.40     | 174.98   | 166.11  | 67.73       | 1.79     | 1.79    | 206Pb/238U concordant scans | 71       | 177     |               |  |  |          |            |             |
| 02431A121_18  | 832                 | 450  | 1.85 | 0.07276 | 0.00587 | 0.01057                           | 0.00027 | 0.04994    | 0.00409 | 0.08        | 71.31   | 5.56  | 5.55        | 67.75      | 1.70     | 1.70                   | 192.36     | 196.22   | 185.09  | 67.75       | 1.70     | 1.70    | 206Pb/238U concordant scans | 71       | 177     |               |  |  |          |            |             |
| 02431A121_55  | 592                 | 268  | 2.21 | 0.07105 | 0.00680 | 0.01057                           | 0.00031 | 0.04876    | 0.00476 | 0.07        | 69.69   | 6.46  | 6.44        | 67.77      | 1.96     | 1.96                   | 136.11     | 237.88   | 221.77  | 67.77       | 1.96     | 1.96    | 206Pb/238U concordant scans | 85       | 177     |               |  |  |          |            |             |
| 02431A121_31  | 1651                | 623  | 2.65 | 0.07016 | 0.00390 | 0.01058                           | 0.00022 | 0.04812    | 0.00267 | 0.17        | 68.85   | 3.70  | 3.70        | 67.81      | 1.42     | 1.42                   | 105.07     | 133.62   | 128.40  | 67.81       | 1.42     | 1.42    | 206Pb/238U concordant scans | 76       | 177     |               |  |  |          |            |             |
| 02431A121_88  | 613                 | 307  | 2.00 | 0.07200 | 0.00552 | 0.01058                           | 0.00027 | 0.04937    | 0.00391 | 0.04        | 70.60   | 5.23  | 5.22        | 67.82      | 1.72     | 1.72                   | 165.67     | 190.66   | 180.15  | 67.82       | 1.72     | 1.72    | 206Pb/238U concordant scans | 82       | 177     |               |  |  |          |            |             |
| 02431A121_83  | 476                 | 349  | 1.36 | 0.07271 | 0.00716 | 0.01058                           | 0.00026 | 0.04982    | 0.00501 | 0.02        | 71.27   | 6.79  | 6.76        | 67.88      | 1.66     | 1.66                   | 186.73     | 242.78   | 225.97  | 67.88       | 1.66     | 1.66    | 206Pb/238U concordant scans | 82       | 177     |               |  |  |          |            |             |
| 02431A121_80  | 591                 | 265  | 2.23 | 0.07252 | 0.00592 | 0.01059                           | 0.00024 | 0.04969    | 0.0041  |             |         |       |             |            |          |                        |            |          |         |             |          |         |                             |          |         |               |  |  |          |            |             |

|              |      |      |          |         |         |         |         |         |         |      |        |       |       |        |       |       |        |        |        |        |       |       |                             |     |     |
|--------------|------|------|----------|---------|---------|---------|---------|---------|---------|------|--------|-------|-------|--------|-------|-------|--------|--------|--------|--------|-------|-------|-----------------------------|-----|-----|
| 02431AZ1_96  | 578  | 567  | 1.02     | 0.07359 | 0.00742 | 0.01077 | 0.00027 | 0.04954 | 0.00509 | 0.03 | 72.10  | 7.03  | 7.00  | 69.09  | 1.74  | 1.74  | 173.33 | 248.79 | 231.18 | 69.09  | 1.74  | 1.74  | 206Pb/238U concordant scans | 72  | 177 |
| 02431AZ1_98  | 298  | 420  | 0.71     | 0.07482 | 0.00921 | 0.01078 | 0.00028 | 0.05032 | 0.00629 | 0.02 | 73.27  | 8.72  | 8.69  | 69.15  | 1.79  | 1.79  | 209.68 | 303.47 | 277.61 | 69.15  | 1.79  | 1.79  | 206Pb/238U concordant scans | 96  | 177 |
| 02431AZ1_91  | 331  | 343  | 0.96     | 0.07660 | 0.01035 | 0.01081 | 0.00031 | 0.05140 | 0.00706 | 0.02 | 74.95  | 9.79  | 9.74  | 69.31  | 1.98  | 1.98  | 258.60 | 331.82 | 301.05 | 69.31  | 1.98  | 1.98  | 206Pb/238U concordant scans | 74  | 177 |
| 02431AZ1_42  | 274  | 198  | 1.38     | 0.07393 | 0.00989 | 0.01081 | 0.00039 | 0.04960 | 0.00681 | 0.02 | 72.42  | 9.37  | 9.33  | 69.32  | 2.46  | 2.46  | 176.07 | 337.02 | 305.48 | 69.32  | 2.46  | 2.46  | 206Pb/238U concordant scans | 74  | 177 |
| 02431AZ1_32  | 1097 | 1177 | 0.93     | 0.07291 | 0.00418 | 0.01081 | 0.00022 | 0.04890 | 0.00287 | 0.06 | 71.46  | 3.96  | 3.95  | 69.34  | 1.39  | 1.39  | 143.00 | 140.69 | 134.90 | 69.34  | 1.39  | 1.39  | 206Pb/238U concordant scans | 88  | 177 |
| 02431AZ1_101 | 321  | 104  | 3.10     | 0.07429 | 0.00904 | 0.01083 | 0.00029 | 0.04976 | 0.00616 | 0.01 | 72.76  | 8.56  | 8.52  | 69.42  | 1.83  | 1.83  | 183.81 | 301.80 | 276.26 | 69.42  | 1.83  | 1.83  | 206Pb/238U concordant scans | 79  | 177 |
| 02431AZ1_11  | 1324 | 1949 | 0.68     | 0.07334 | 0.00418 | 0.01083 | 0.00025 | 0.04904 | 0.00283 | 0.13 | 71.77  | 3.96  | 3.95  | 69.45  | 1.58  | 1.58  | 149.76 | 138.02 | 132.44 | 69.45  | 1.58  | 1.58  | 206Pb/238U concordant scans | 110 | 177 |
| 02431AZ1_16  | 319  | 277  | 1.15     | 0.07259 | 0.00772 | 0.01083 | 0.00037 | 0.04860 | 0.00531 | 0.06 | 71.16  | 7.32  | 7.29  | 69.46  | 2.38  | 2.37  | 128.58 | 257.17 | 247.59 | 69.46  | 2.38  | 2.37  | 206Pb/238U concordant scans | 93  | 177 |
| 02431AZ1_5   | 244  | 228  | 1.07     | 0.07967 | 0.01414 | 0.01083 | 0.00067 | 0.05333 | 0.00967 | 0.11 | 77.84  | 13.34 | 13.26 | 69.47  | 4.28  | 4.28  | 342.97 | 438.68 | 386.18 | 69.47  | 4.28  | 4.28  | 206Pb/238U concordant scans | 68  | 177 |
| 02431AZ1_14  | 1170 | 1370 | 0.85     | 0.07489 | 0.00590 | 0.01084 | 0.00040 | 0.05008 | 0.00394 | 0.22 | 73.33  | 5.58  | 5.57  | 69.53  | 2.52  | 2.52  | 198.90 | 187.99 | 177.74 | 69.53  | 2.52  | 2.52  | 206Pb/238U concordant scans | 57  | 177 |
| 02431AZ1_43  | 801  | 700  | 1.15     | 0.07407 | 0.00615 | 0.01086 | 0.00029 | 0.04948 | 0.00419 | 0.08 | 72.55  | 5.82  | 5.81  | 69.61  | 1.84  | 1.84  | 170.51 | 203.85 | 191.88 | 69.61  | 1.84  | 1.84  | 206Pb/238U concordant scans | 93  | 177 |
| 02431AZ1_87  | 357  | 317  | 1.13     | 0.07828 | 0.01438 | 0.01086 | 0.00043 | 0.05228 | 0.00977 | 0.02 | 76.53  | 13.59 | 13.50 | 69.63  | 2.72  | 2.72  | 297.55 | 457.03 | 400.48 | 69.63  | 2.72  | 2.72  | 206Pb/238U concordant scans | 33  | 177 |
| 02431AZ1_35  | 410  | 160  | 2.57     | 0.07323 | 0.00735 | 0.01086 | 0.00029 | 0.04890 | 0.00500 | 0.04 | 71.76  | 6.96  | 6.94  | 69.64  | 1.83  | 1.83  | 143.13 | 249.31 | 231.66 | 69.64  | 1.83  | 1.83  | 206Pb/238U concordant scans | 86  | 177 |
| 02431AZ1_56  | 642  | 544  | 1.18     | 0.07184 | 0.00526 | 0.01088 | 0.00027 | 0.04788 | 0.00361 | 0.05 | 70.45  | 4.99  | 4.98  | 69.78  | 1.74  | 1.74  | 93.15  | 183.75 | 174.02 | 69.78  | 1.74  | 1.74  | 206Pb/238U concordant scans | 79  | 177 |
| 02431AZ1_2   | 405  | 158  | 2.56     | 0.07358 | 0.00800 | 0.01089 | 0.00055 | 0.04901 | 0.00543 | 0.18 | 72.09  | 7.58  | 7.55  | 69.82  | 3.48  | 3.48  | 148.10 | 270.44 | 249.80 | 69.82  | 3.48  | 3.48  | 206Pb/238U concordant scans | 81  | 177 |
| 02431AZ1_3   | 687  | 851  | 0.81     | 0.07535 | 0.00776 | 0.01089 | 0.00068 | 0.05016 | 0.00530 | 0.25 | 73.76  | 7.34  | 7.31  | 69.84  | 4.34  | 4.34  | 202.62 | 255.08 | 236.57 | 69.84  | 4.34  | 4.34  | 206Pb/238U concordant scans | 88  | 177 |
| 02431AZ1_94  | 259  | 137  | 1.88     | 0.07730 | 0.01137 | 0.01099 | 0.00032 | 0.05103 | 0.00759 | 0.03 | 75.60  | 10.75 | 10.69 | 70.44  | 2.07  | 2.07  | 241.97 | 362.37 | 326.02 | 70.44  | 2.07  | 2.07  | 206Pb/238U concordant scans | 99  | 177 |
| 02431AZ1_97  | 403  | 215  | 1.87     | 0.07452 | 0.01122 | 0.01101 | 0.00043 | 0.04911 | 0.00755 | 0.04 | 72.98  | 10.63 | 10.57 | 70.56  | 2.76  | 2.75  | 153.02 | 306.03 | 341.72 | 70.56  | 2.76  | 2.75  | 206Pb/238U concordant scans | 54  | 177 |
| 02431AZ1_33  | 317  | 328  | 0.96     | 0.07790 | 0.00890 | 0.01105 | 0.00034 | 0.05059 | 0.00597 | 0.04 | 75.37  | 8.41  | 8.38  | 70.82  | 2.16  | 2.16  | 222.06 | 284.91 | 261.98 | 70.82  | 2.16  | 2.16  | 206Pb/238U concordant scans | 73  | 177 |
| 02431AZ1_69  | 299  | 394  | 0.76     | 0.07695 | 0.01018 | 0.01109 | 0.00038 | 0.05029 | 0.00681 | 0.03 | 75.23  | 9.62  | 9.57  | 71.11  | 2.45  | 2.45  | 208.22 | 330.31 | 299.90 | 71.11  | 2.45  | 2.45  | 206Pb/238U concordant scans | 60  | 177 |
| 02431AZ1_10  | 304  | 292  | 1.04     | 0.07626 | 0.00839 | 0.01118 | 0.00039 | 0.04946 | 0.00560 | 0.05 | 74.62  | 7.93  | 7.90  | 71.69  | 2.48  | 2.48  | 169.69 | 275.56 | 254.13 | 71.69  | 2.48  | 2.48  | 206Pb/238U concordant scans | 68  | 177 |
| 02431AZ1_6   | 861  | 467  | 1.85     | 0.07818 | 0.01030 | 0.01131 | 0.00073 | 0.05015 | 0.00658 | 0.20 | 76.44  | 9.44  | 9.40  | 72.48  | 4.68  | 4.68  | 202.11 | 319.65 | 291.10 | 72.48  | 4.68  | 4.68  | 206Pb/238U concordant scans | 30  | 177 |
| 02431AZ1_85  | 403  | 148  | 2.73     | 0.08204 | 0.00718 | 0.01204 | 0.00031 | 0.04941 | 0.00444 | 0.03 | 80.06  | 6.75  | 6.72  | 77.17  | 1.95  | 1.95  | 167.21 | 216.87 | 203.38 | 77.17  | 1.95  | 1.95  | 206Pb/238U concordant scans | 78  | 177 |
| 02431AZ1_77  | 349  | 118  | 2.95     | 0.10260 | 0.01025 | 0.01516 | 0.00039 | 0.04910 | 0.00498 | 0.06 | 99.17  | 9.46  | 9.42  | 96.97  | 2.50  | 2.50  | 152.44 | 246.47 | 229.20 | 96.97  | 2.50  | 2.50  | 206Pb/238U concordant scans | 82  | 177 |
| 02431AZ1_47  | 575  | 206  | 2.79     | 0.10207 | 0.01511 | 0.02583 | 0.00095 | 0.05343 | 0.00439 | 0.14 | 176.86 | 12.93 | 12.85 | 164.37 | 5.94  | 5.94  | 347.22 | 191.34 | 180.63 | 164.37 | 5.94  | 5.94  | 206Pb/238U concordant scans | 62  | 177 |
| 02431AZ1_79  | 238  | 129  | 1.84     | 0.29052 | 0.01657 | 0.29654 | 0.00069 | 0.05126 | 0.00413 | 0.06 | 193.13 | 13.96 | 13.87 | 188.31 | 4.31  | 4.31  | 252.49 | 190.73 | 180.16 | 188.31 | 4.31  | 4.31  | 206Pb/238U concordant scans | 79  | 177 |
| 02431AZ1_73  | 199  | 51   | 3.92     | 0.21832 | 0.04624 | 0.30002 | 0.00218 | 0.05274 | 0.01163 | 0.05 | 200.51 | 38.91 | 38.18 | 190.68 | 13.64 | 13.62 | 317.76 | 544.36 | 465.87 | 190.68 | 13.64 | 13.62 | 206Pb/238U concordant scans | 28  | 177 |
| 02431AZ1_9   | 0    | 0    | 0.000000 | 0.00000 | 0.00000 | 0.00000 | 0.00000 | 0.00000 | 0.00000 | 0.00 | 0.00   | 0.00  | 0.00  | 0.00   | 0.00  | 0.00  | 0.00   | 0.00   | 0.00   | 0.00   | 0.00  | 0.00  | failed                      | 0   | 0   |
| 02431AZ1_19  | 0    | 0    | 0.000000 | 0.00000 | 0.00000 | 0.00000 | 0.00000 | 0.00000 | 0.00000 | 0.00 | 0.00   | 0.00  | 0.00  | 0.00   | 0.00  | 0.00  | 0.00   | 0.00   | 0.00   | 0.00   | 0.00  | 0.00  | failed                      | 0   | 0   |
| 02431AZ1_49  | 0    | 0    | 0.000000 | 0.00000 | 0.00000 | 0.00000 | 0.00000 | 0.00000 | 0.00000 | 0.00 | 0.00   | 0.00  | 0.00  | 0.00   | 0.00  | 0.00  | 0.00   | 0.00   | 0.00   | 0.00   | 0.00  | 0.00  | failed                      | 0   | 0   |
| 02431AZ1_50  | 0    | 0    | 0.000000 | 0.00000 | 0.00000 | 0.00000 | 0.00000 | 0.00000 | 0.00000 | 0.00 | 0.00   | 0.00  | 0.00  | 0.00   | 0.00  | 0.00  | 0.00   | 0.00   | 0.00   | 0.00   | 0.00  | 0.00  | failed                      | 0   | 0   |
| 02431AZ1_58  | 0    | 0    | 0.000000 | 0.00000 | 0.00000 | 0.00000 | 0.00000 | 0.00000 | 0.00000 | 0.00 | 0.00   | 0.00  | 0.00  | 0.00   | 0.00  | 0.00  | 0.00   | 0.00   | 0.00   | 0.00   | 0.00  | 0.00  | failed                      | 0   | 0   |
| 02431AZ1_61  | 0    | 0    | 0.000000 | 0.00000 | 0.00000 | 0.00000 | 0.00000 | 0.00000 | 0.00000 | 0.00 | 0.00   | 0.00  | 0.00  | 0.00   | 0.00  | 0.00  | 0.00   | 0.00   | 0.00   | 0.00   | 0.00  | 0.00  | failed                      | 0   | 0   |
| 02431AZ1_68  | 0    | 0    | 0.000000 | 0.00000 | 0.00000 | 0.00000 | 0.00000 | 0.00000 | 0.00000 | 0.00 | 0.00   | 0.00  | 0.00  | 0.00   | 0.00  | 0.00  | 0.00   | 0.00   | 0.00   | 0.00   | 0.00  | 0.00  | failed                      | 0   | 0   |
| 02431AZ1_84  | 0    | 0    | 0.000000 | 0.00000 | 0.00000 | 0.00000 | 0.00000 | 0.00000 | 0.00000 | 0.00 | 0.00   | 0.00  | 0.00  | 0.00   | 0.00  | 0.00  | 0.00   | 0.00   | 0.00   | 0.00   | 0.00  | 0.00  | failed                      | 0   | 0   |
| 02431AZ1_86  | 0    | 0    | 0.000000 | 0.00000 | 0.00000 | 0.00000 | 0.00000 | 0.00000 | 0.00000 | 0.00 | 0.00   | 0.00  | 0.00  | 0.00   | 0.00  | 0.00  | 0.00   | 0.00   | 0.00   | 0.00   | 0.00  | 0.00  | failed                      | 0   | 0   |
| 02431AZ1_106 | 0    | 0    | 0.000000 | 0.00000 | 0.00000 | 0.00000 | 0.00000 | 0.00000 | 0.00000 | 0.00 | 0.00   | 0.00  | 0.00  | 0.00   | 0.00  | 0.00  | 0.00   | 0.00   | 0.00   | 0.00   | 0.00  | 0.00  | failed                      | 0   | 0   |

## Data Repository Item E - U-Pb zircon analytical results from Cantwell Formation bentonites

| Mineral                  |  | Zircon              |            | Sample Name                       |            | 03POLY  |            | A22 Name |             | 1413-04 |                   |            |         |                        |                     |         |         |             |         |         |                    |         |         |                             |            |             |  |  |  |  |  |
|--------------------------|--|---------------------|------------|-----------------------------------|------------|---------|------------|----------|-------------|---------|-------------------|------------|---------|------------------------|---------------------|---------|---------|-------------|---------|---------|--------------------|---------|---------|-----------------------------|------------|-------------|--|--|--|--|--|
|                          |  | Uranium and Thorium |            | Concordant Scans: Isotopic Ratios |            |         |            |          |             |         |                   |            |         | Concordant Scans: Ages |                     |         |         |             |         |         |                    |         |         | Preferred Age               |            |             |  |  |  |  |  |
| Analysis Name            |  | [U] (ppm)           | [Th] (ppm) | U/Th                              | 207Pb/235U | 2-sigma | 206Pb/238U | 2-sigma  | 207Pb/206Pb | 2-sigma | Error Correlation | 207Pb/235U | 2-sigma | 2-sigma                | 206Pb/238U Age (Ma) | 2-sigma | 2-sigma | 207Pb/206Pb | 2-sigma | 2-sigma | Preferred Age (Ma) | 2-sigma | 2-sigma | Age Type                    | Concordant | Total Scans |  |  |  |  |  |
| P1413_004_Zm_A_1_MBD_105 |  | 282                 | 193        | 1.46                              | 0.06564    | 0.01981 | 0.00944    | 0.00091  | 0.05041     | 0.01563 | 0.07              | 64.55      | 18.96   | 18.79                  | 60.60               | 5.79    | 5.79    | 213.77      | 427.54  | 648.51  | 60.60              | 5.79    | 5.79    | 206Pb/238U concordant scans | 12         | 31          |  |  |  |  |  |
| P1413_004_Zm_A_1_MBD_84  |  | 268                 | 231        | 1.16                              | 0.06752    | 0.01351 | 0.00996    | 0.00082  | 0.04917     | 0.00977 | 0.22              | 66.34      | 12.89   | 12.81                  | 63.88               | 5.27    | 5.26    | 156.03      | 312.06  | 434.92  | 63.88              | 5.27    | 5.26    | 206Pb/238U concordant scans | 13         | 31          |  |  |  |  |  |
| P1413_004_Zm_A_1_MBD_64  |  | 241                 | 209        | 1.15                              | 0.07112    | 0.01347 | 0.01010    | 0.00056  | 0.05106     | 0.00986 | 0.07              | 69.76      | 12.81   | 12.73                  | 64.79               | 3.60    | 3.60    | 243.64      | 478.24  | 416.86  | 64.79              | 3.60    | 3.60    | 206Pb/238U concordant scans | 15         | 31          |  |  |  |  |  |
| P1413_004_Zm_A_1_MBD_112 |  | 163                 | 212        | 0.77                              | 0.07374    | 0.01382 | 0.01014    | 0.00052  | 0.05277     | 0.01009 | 0.05              | 72.25      | 13.11   | 13.02                  | 65.01               | 3.33    | 3.33    | 318.95      | 466.64  | 407.76  | 65.01              | 3.33    | 3.33    | 206Pb/238U concordant scans | 16         | 31          |  |  |  |  |  |
| P1413_004_Zm_A_1_MBD_110 |  | 160                 | 82         | 1.96                              | 0.07433    | 0.01681 | 0.01023    | 0.00059  | 0.05272     | 0.01213 | 0.05              | 72.80      | 15.95   | 15.83                  | 65.59               | 3.76    | 3.76    | 316.64      | 570.54  | 484.91  | 65.59              | 3.76    | 3.76    | 206Pb/238U concordant scans | 16         | 31          |  |  |  |  |  |
| P1413_004_Zm_A_1_MBD_97  |  | 112                 | 103        | 1.09                              | 0.06795    | 0.02151 | 0.01026    | 0.00078  | 0.04803     | 0.01549 | 0.04              | 66.75      | 20.56   | 20.35                  | 65.81               | 5.01    | 5.00    | 100.63      | 201.26  | 685.54  | 65.81              | 5.01    | 5.00    | 206Pb/238U concordant scans | 15         | 31          |  |  |  |  |  |
| P1413_004_Zm_A_1_MBD_79  |  | 126                 | 81         | 1.54                              | 0.07196    | 0.01029 | 0.00092    | 0.00027  | 0.08227     | 0.05113 | 0.02              | 112.07     | 66.50   | 64.40                  | 65.97               | 5.88    | 5.88    | 1252.04     | 1543.59 | 1022.33 | 65.97              | 5.88    | 5.88    | 206Pb/238U concordant scans | 18         | 31          |  |  |  |  |  |
| P1413_004_Zm_A_1_MBD_15  |  | 779                 | 1028       | 0.76                              | 0.06823    | 0.00773 | 0.01034    | 0.00032  | 0.04787     | 0.00544 | 0.10              | 67.02      | 7.36    | 7.33                   | 66.30               | 2.02    | 2.01    | 92.62       | 185.24  | 258.64  | 66.30              | 2.02    | 2.01    | 206Pb/238U concordant scans | 18         | 31          |  |  |  |  |  |
| P1413_004_Zm_A_1_MBD_13  |  | 402                 | 545        | 0.74                              | 0.06976    | 0.00780 | 0.01042    | 0.00040  | 0.04856     | 0.00555 | 0.07              | 68.47      | 7.41    | 7.39                   | 66.83               | 2.53    | 2.52    | 126.43      | 252.85  | 258.57  | 66.83              | 2.53    | 2.52    | 206Pb/238U concordant scans | 21         | 31          |  |  |  |  |  |
| P1413_004_Zm_A_1_MBD_58  |  | 1265                | 1838       | 0.69                              | 0.07071    | 0.00649 | 0.01043    | 0.00028  | 0.04918     | 0.00454 | 0.09              | 69.37      | 6.17    | 6.15                   | 66.87               | 1.79    | 1.79    | 156.37      | 223.55  | 209.25  | 66.87              | 1.79    | 1.79    | 206Pb/238U concordant scans | 21         | 31          |  |  |  |  |  |
| P1413_004_Zm_A_1_MBD_14  |  | 682                 | 619        | 1.10                              | 0.07224    | 0.00845 | 0.01044    | 0.00035  | 0.05020     | 0.00594 | 0.08              | 70.82      | 8.01    | 7.98                   | 66.93               | 2.22    | 2.22    | 204.26      | 286.72  | 263.54  | 66.93              | 2.22    | 2.22    | 206Pb/238U concordant scans | 24         | 31          |  |  |  |  |  |
| P1413_004_Zm_A_1_MBD_102 |  | 300                 | 251        | 1.19                              | 0.06658    | 0.01336 | 0.01044    | 0.00061  | 0.04624     | 0.00909 | 0.21              | 65.45      | 12.76   | 12.68                  | 66.98               | 3.91    | 3.91    | 9.97        | 19.94   | 441.73  | 66.98              | 3.91    | 3.91    | 206Pb/238U concordant scans | 15         | 31          |  |  |  |  |  |
| P1413_004_Zm_A_1_MBD_57  |  | 397                 | 292        | 1.36                              | 0.07276    | 0.01215 | 0.01047    | 0.00050  | 0.05042     | 0.00854 | 0.08              | 71.31      | 11.54   | 11.47                  | 67.12               | 3.19    | 3.19    | 214.28      | 417.73  | 370.22  | 67.12              | 3.19    | 3.19    | 206Pb/238U concordant scans | 13         | 31          |  |  |  |  |  |
| P1413_004_Zm_A_1_MBD_116 |  | 264                 | 255        | 1.04                              | 0.07389    | 0.01203 | 0.01047    | 0.00081  | 0.05120     | 0.00900 | 0.05              | 72.38      | 11.41   | 11.35                  | 67.12               | 5.14    | 5.14    | 249.93      | 431.88  | 381.18  | 67.12              | 5.14    | 5.14    | 206Pb/238U concordant scans | 16         | 31          |  |  |  |  |  |
| P1413_004_Zm_A_1_MBD_56  |  | 482                 | 1057       | 0.46                              | 0.06980    | 0.01058 | 0.01047    | 0.00056  | 0.04835     | 0.00741 | 0.13              | 68.51      | 10.07   | 10.02                  | 67.15               | 3.59    | 3.58    | 116.33      | 232.67  | 342.80  | 67.15              | 3.59    | 3.58    | 206Pb/238U concordant scans | 7          | 31          |  |  |  |  |  |
| P1413_004_Zm_A_1_MBD_47  |  | 284                 | 192        | 1.48                              | 0.07596    | 0.01222 | 0.01051    | 0.00062  | 0.05243     | 0.00854 | 0.14              | 74.34      | 11.56   | 11.50                  | 67.38               | 3.94    | 3.94    | 304.13      | 394.24  | 351.43  | 67.38              | 3.94    | 3.94    | 206Pb/238U concordant scans | 12         | 31          |  |  |  |  |  |
| P1413_004_Zm_A_1_MBD_21  |  | 108                 | 93         | 1.17                              | 0.07143    | 0.01710 | 0.01053    | 0.00057  | 0.04919     | 0.01194 | 0.04              | 70.06      | 16.27   | 16.15                  | 67.54               | 3.63    | 3.63    | 156.89      | 313.77  | 523.49  | 67.54              | 3.63    | 3.63    | 206Pb/238U concordant scans | 24         | 31          |  |  |  |  |  |
| P1413_004_Zm_A_1_MBD_94  |  | 374                 | 430        | 0.87                              | 0.07104    | 0.00832 | 0.01056    | 0.00046  | 0.04880     | 0.00579 | 0.13              | 69.68      | 7.90    | 7.87                   | 67.71               | 2.92    | 2.92    | 138.13      | 276.26  | 267.60  | 67.71              | 2.92    | 2.92    | 206Pb/238U concordant scans | 17         | 31          |  |  |  |  |  |
| P1413_004_Zm_A_1_MBD_19  |  | 136                 | 90         | 1.51                              | 0.07515    | 0.01810 | 0.01058    | 0.00074  | 0.05152     | 0.01253 | 0.10              | 73.57      | 17.16   | 17.02                  | 67.84               | 4.69    | 4.69    | 264.29      | 528.57  | 515.05  | 67.84              | 4.69    | 4.69    | 206Pb/238U concordant scans | 13         | 31          |  |  |  |  |  |
| P1413_004_Zm_A_1_MBD_61  |  | 349                 | 394        | 0.88                              | 0.07219    | 0.01089 | 0.01059    | 0.00052  | 0.04945     | 0.00771 | 0.04              | 70.78      | 10.34   | 10.29                  | 67.90               | 3.34    | 3.34    | 169.04      | 338.08  | 345.13  | 67.90              | 3.34    | 3.34    | 206Pb/238U concordant scans | 23         | 31          |  |  |  |  |  |
| P1413_004_Zm_A_1_MBD_71  |  | 214                 | 292        | 0.73                              | 0.07893    | 0.01412 | 0.01063    | 0.00043  | 0.05387     | 0.00963 | 0.11              | 77.14      | 13.33   | 13.25                  | 68.14               | 2.77    | 2.77    | 365.74      | 430.45  | 379.73  | 68.14              | 2.77    | 2.77    | 206Pb/238U concordant scans | 21         | 31          |  |  |  |  |  |
| P1413_004_Zm_A_1_MBD_108 |  | 114                 | 126        | 0.90                              | 0.08329    | 0.02698 | 0.01068    | 0.00070  | 0.05654     | 0.01856 | 0.03              | 81.23      | 25.45   | 25.14                  | 68.51               | 4.48    | 4.48    | 473.61      | 822.31  | 653.92  | 68.51              | 4.48    | 4.48    | 206Pb/238U concordant scans | 21         | 31          |  |  |  |  |  |
| P1413_004_Zm_A_1_MBD_95  |  | 105                 | 87         | 1.21                              | 0.07758    | 0.02046 | 0.01071    | 0.00070  | 0.05254     | 0.01391 | 0.10              | 75.87      | 19.37   | 19.19                  | 68.67               | 4.47    | 4.47    | 308.96      | 617.92  | 552.53  | 68.67              | 4.47    | 4.47    | 206Pb/238U concordant scans | 24         | 31          |  |  |  |  |  |
| P1413_004_Zm_A_1_MBD_36  |  | 138                 | 119        | 1.16                              | 0.07267    | 0.01613 | 0.01074    | 0.00079  | 0.04908     | 0.01120 | 0.07              | 71.23      | 15.33   | 15.21                  | 68.86               | 5.06    | 5.06    | 151.47      | 302.94  | 495.19  | 68.86              | 5.06    | 5.06    | 206Pb/238U concordant scans | 16         | 31          |  |  |  |  |  |
| P1413_004_Zm_A_1_MBD_89  |  | 172                 | 199        | 0.86                              | 0.07389    | 0.01925 | 0.01074    | 0.00076  | 0.04988     | 0.01298 | 0.14              | 72.38      | 18.29   | 18.12                  | 68.89               | 4.86    | 4.85    | 189.26      | 378.51  | 555.09  | 68.89              | 4.86    | 4.85    | 206Pb/238U concordant scans | 19         | 31          |  |  |  |  |  |
| P1413_004_Zm_A_1_MBD_99  |  | 245                 | 171        | 1.43                              | 0.07133    | 0.01267 | 0.01076    | 0.00062  | 0.04807     | 0.00864 | 0.12              | 69.96      | 12.05   | 11.98                  | 69.01               | 3.93    | 3.93    | 102.65      | 205.30  | 399.41  | 69.01              | 3.93    | 3.93    | 206Pb/238U concordant scans | 19         | 31          |  |  |  |  |  |
| P1413_004_Zm_A_1_MBD_41  |  | 516                 | 523        | 0.99                              | 0.07120    | 0.00822 | 0.01077    | 0.00060  | 0.04797     | 0.00536 | 0.30              | 69.84      | 7.81    | 7.78                   | 69.03               | 3.85    | 3.85    | 97.56       | 195.11  | 254.35  | 69.03              | 3.85    | 3.85    | 206Pb/238U concordant scans | 14         | 31          |  |  |  |  |  |
| P1413_004_Zm_A_1_MBD_109 |  | 299                 | 297        | 1.01                              | 0.07147    | 0.01310 | 0.01078    | 0.00059  | 0.04810     | 0.00891 | 0.11              | 70.09      | 12.45   | 12.38                  | 69.09               | 3.77    | 3.77    | 104.39      | 208.77  | 410.77  | 69.09              | 3.77    | 3.77    | 206Pb/238U concordant scans | 11         | 31          |  |  |  |  |  |
| P1413_004_Zm_A_1_MBD_85  |  | 1173                | 2870       | 0.41                              | 0.07241    | 0.01090 | 0.01083    | 0.00045  | 0.04851     | 0.00375 | 0.34              | 70.98      | 5.59    | 5.58                   | 69.41               | 2.90    | 2.89    | 124.10      | 187.22  | 177.10  | 69.41              | 2.90    | 2.89    | 206Pb/238U concordant scans | 16         | 31          |  |  |  |  |  |
| P1413_004_Zm_A_1_MBD_115 |  | 276                 | 172        | 1.61                              | 0.06987    | 0.01153 | 0.01083    | 0.00045  | 0.04677     | 0.00786 | 0.40              | 68.58      | 10.97   | 10.91                  | 69.47               | 2.89    | 2.89    | 37.73       | 75.46   | 379.23  | 69.47              | 2.89    | 2.89    | 206Pb/238U concordant scans | 20         | 31          |  |  |  |  |  |
| P1413_004_Zm_A_1_MBD_16  |  | 279                 | 180        | 1.55                              | 0.07471    | 0.01428 | 0.01085    | 0.00045  | 0.04993     | 0.00959 | 0.08              | 73.16      | 13.53   | 13.45                  | 69.58               | 2.90    | 2.90    | 191.57      | 383.15  | 418.49  | 69.58              | 2.90    | 2.90    | 206Pb/238U concordant scans | 22         | 31          |  |  |  |  |  |
| P1413_004_Zm_A_1_MBD_10  |  | 159                 | 108        | 1.47                              | 0.07868    | 0.01994 | 0.01086    | 0.00075  | 0.05257     | 0.01363 | 0.05              | 76.90      | 18.86   | 18.69                  | 69.60               | 4.79    | 4.79    | 310.29      | 620.57  | 541.80  | 69.60              | 4.79    | 4.79    | 206Pb/238U concordant scans | 14         | 31          |  |  |  |  |  |
| P1413_004_Zm_A_1_MBD_73  |  | 282                 | 351        | 0.80                              | 0.07073    | 0.00797 | 0.01086    | 0.00060  | 0.04723     | 0.00572 | 0.07              | 69.39      | 7.57    | 7.54                   | 69.63               | 3.80    | 3.80    | 61.08       | 122.16  | 276.52  | 69.63              | 3.80    | 3.80    | 206Pb/238U concordant scans | 11         | 31          |  |  |  |  |  |
| P1413_004_Zm_A_1_MBD_118 |  | 959                 | 1368       | 0.70                              | 0.07351    | 0.00676 | 0.01087    | 0.00029  | 0.04906     | 0.00454 | 0.09              | 72.02      | 6.41    | 6.39                   | 69.67               | 1.86    | 1.86    | 150.78      | 224.55  | 210.13  | 69.67              | 1.86    | 1.86    | 206Pb/238U concordant scans | 23         | 31          |  |  |  |  |  |
| P1413_004_Zm_A_1_MBD_74  |  | 163                 | 121        | 1.35                              | 0.08797    | 0.02304 | 0.01090    | 0.00059  | 0.05854     | 0.01552 | 0.04              | 85.61      | 21.62   | 21.39                  | 69.88               | 3.78    | 3.79    | 550.05      | 638.43  | 531.72  | 69.88              | 3.78    | 3.79    | 206Pb/238U concordant scans | 16         | 31          |  |  |  |  |  |
| P1413_004_Zm_A_1_MBD_4   |  | 201                 |            |                                   |            |         |            |          |             |         |                   |            |         |                        |                     |         |         |             |         |         |                    |         |         |                             |            |             |  |  |  |  |  |

|                          |      |      |       |         |         |         |         |         |         |      |         |        |        |         |        |        |         |        |        |         |        |        |                                |    |    |
|--------------------------|------|------|-------|---------|---------|---------|---------|---------|---------|------|---------|--------|--------|---------|--------|--------|---------|--------|--------|---------|--------|--------|--------------------------------|----|----|
| P1413_004_Zm_A_1_M80_60  | 598  | 285  | 2.09  | 0.09971 | 0.00612 | 0.01480 | 0.00044 | 0.04885 | 0.00301 | 0.18 | 96.51   | 5.65   | 5.64   | 94.73   | 2.79   | 2.79   | 140.80  | 148.02 | 141.62 | 94.73   | 2.79   | 2.79   | 206Pb/238U concordant scans    | 22 | 31 |
| P1413_004_Zm_A_1_M80_111 | 1154 | 472  | 2.44  | 0.09820 | 0.00910 | 0.01483 | 0.00039 | 0.04802 | 0.00455 | 0.02 | 95.12   | 8.43   | 8.40   | 94.91   | 2.51   | 2.51   | 100.34  | 200.67 | 217.00 | 94.91   | 2.51   | 2.51   | 206Pb/238U concordant scans    | 7  | 31 |
| P1413_004_Zm_A_1_M80_48  | 325  | 189  | 1.72  | 0.10160 | 0.01323 | 0.01493 | 0.00074 | 0.04937 | 0.00624 | 0.26 | 98.25   | 12.23  | 12.16  | 95.51   | 4.71   | 4.71   | 165.32  | 309.56 | 282.77 | 95.51   | 4.71   | 4.71   | 206Pb/238U concordant scans    | 22 | 31 |
| P1413_004_Zm_A_1_M80_65  | 573  | 386  | 1.49  | 0.10761 | 0.01062 | 0.01521 | 0.00057 | 0.05131 | 0.00516 | 0.11 | 103.78  | 9.76   | 9.71   | 97.31   | 3.62   | 3.62   | 254.98  | 239.72 | 223.24 | 97.31   | 3.62   | 3.62   | 206Pb/238U concordant scans    | 20 | 31 |
| P1413_004_Zm_A_1_M80_5   | 236  | 147  | 1.61  | 0.11082 | 0.01618 | 0.01522 | 0.00103 | 0.05280 | 0.00780 | 0.20 | 106.71  | 14.84  | 14.73  | 97.39   | 6.54   | 6.54   | 320.12  | 354.15 | 319.19 | 97.39   | 6.54   | 6.54   | 206Pb/238U concordant scans    | 12 | 31 |
| P1413_004_Zm_A_1_M80_67  | 1119 | 497  | 2.25  | 0.10104 | 0.00815 | 0.01525 | 0.00051 | 0.04806 | 0.00385 | 0.20 | 97.74   | 7.53   | 7.51   | 97.55   | 3.26   | 3.26   | 102.22  | 195.24 | 184.28 | 97.55   | 3.26   | 3.26   | 206Pb/238U concordant scans    | 26 | 31 |
| P1413_004_Zm_A_1_M80_113 | 848  | 655  | 1.29  | 0.10674 | 0.00791 | 0.01530 | 0.00072 | 0.05059 | 0.00396 | 0.20 | 102.97  | 7.27   | 7.24   | 97.90   | 4.58   | 4.58   | 222.03  | 186.10 | 176.04 | 97.90   | 4.58   | 4.58   | 206Pb/238U concordant scans    | 14 | 31 |
| P1413_004_Zm_A_1_M80_66  | 447  | 338  | 1.32  | 0.10406 | 0.01188 | 0.01533 | 0.00046 | 0.04923 | 0.00567 | 0.07 | 100.52  | 10.95  | 10.89  | 98.07   | 2.91   | 2.91   | 158.90  | 281.12 | 258.86 | 98.07   | 2.91   | 2.91   | 206Pb/238U concordant scans    | 20 | 31 |
| P1413_004_Zm_A_1_M80_46  | 469  | 328  | 1.43  | 0.10798 | 0.01398 | 0.01542 | 0.00112 | 0.05079 | 0.00608 | 0.41 | 104.11  | 12.85  | 12.77  | 98.64   | 7.13   | 7.13   | 231.41  | 288.70 | 265.17 | 98.64   | 7.13   | 7.13   | 206Pb/238U concordant scans    | 12 | 31 |
| P1413_004_Zm_A_1_M80_100 | 920  | 274  | 3.35  | 0.10259 | 0.01138 | 0.01542 | 0.00066 | 0.04825 | 0.00516 | 0.28 | 99.17   | 10.51  | 10.45  | 98.65   | 4.16   | 4.16   | 111.59  | 223.17 | 243.17 | 98.65   | 4.16   | 4.16   | 206Pb/238U concordant scans    | 20 | 31 |
| P1413_004_Zm_A_1_M80_75  | 356  | 227  | 1.57  | 0.10044 | 0.01329 | 0.01545 | 0.00061 | 0.04715 | 0.00629 | 0.11 | 97.18   | 12.30  | 12.22  | 98.83   | 3.89   | 3.89   | 57.04   | 114.09 | 303.39 | 98.83   | 3.89   | 3.89   | 206Pb/238U concordant scans    | 22 | 31 |
| P1413_004_Zm_A_1_M80_119 | 691  | 176  | 3.93  | 0.10462 | 0.01126 | 0.01548 | 0.00062 | 0.04900 | 0.00542 | 0.09 | 101.03  | 10.38  | 10.33  | 99.05   | 3.96   | 3.96   | 147.96  | 270.20 | 249.58 | 99.05   | 3.96   | 3.96   | 206Pb/238U concordant scans    | 18 | 31 |
| P1413_004_Zm_A_1_M80_76  | 174  | 145  | 1.20  | 0.11723 | 0.02558 | 0.01560 | 0.00071 | 0.05451 | 0.01201 | 0.05 | 112.56  | 23.39  | 23.12  | 99.78   | 4.49   | 4.49   | 392.18  | 536.36 | 459.68 | 99.78   | 4.49   | 4.49   | 206Pb/238U concordant scans    | 18 | 31 |
| P1413_004_Zm_A_1_M80_96  | 421  | 259  | 1.62  | 0.18211 | 0.01696 | 0.02689 | 0.00100 | 0.04912 | 0.00450 | 0.22 | 169.87  | 14.62  | 14.51  | 171.04  | 6.26   | 6.26   | 153.61  | 221.91 | 207.81 | 171.04  | 6.26   | 6.26   | 206Pb/238U concordant scans    | 23 | 31 |
| P1413_004_Zm_A_1_M80_27  | 643  | 260  | 2.47  | 0.20237 | 0.01471 | 0.02832 | 0.00107 | 0.05183 | 0.00356 | 0.35 | 187.13  | 12.46  | 12.38  | 180.02  | 6.72   | 6.72   | 277.91  | 161.33 | 153.69 | 180.02  | 6.72   | 6.72   | 206Pb/238U concordant scans    | 24 | 31 |
| P1413_004_Zm_A_1_M80_27  | 516  | 349  | 1.48  | 0.20044 | 0.01928 | 0.02844 | 0.00095 | 0.05112 | 0.00489 | 0.17 | 185.50  | 16.37  | 16.24  | 180.77  | 5.96   | 5.96   | 246.04  | 228.11 | 213.15 | 180.77  | 5.96   | 5.96   | 206Pb/238U concordant scans    | 24 | 31 |
| P1413_004_Zm_A_1_M80_104 | 254  | 103  | 2.48  | 0.20424 | 0.01906 | 0.02876 | 0.00122 | 0.05151 | 0.00483 | 0.20 | 188.71  | 16.14  | 16.01  | 182.76  | 7.62   | 7.62   | 263.78  | 222.56 | 208.28 | 182.76  | 7.62   | 7.62   | 206Pb/238U concordant scans    | 20 | 31 |
| P1413_004_Zm_A_1_M80_101 | 295  | 136  | 2.16  | 0.20849 | 0.02996 | 0.02946 | 0.00144 | 0.05132 | 0.00723 | 0.22 | 192.29  | 25.33  | 25.02  | 187.18  | 9.05   | 9.04   | 255.40  | 340.88 | 308.49 | 187.18  | 9.05   | 9.04   | 206Pb/238U concordant scans    | 15 | 31 |
| P1413_004_Zm_A_1_M80_69  | 971  | 1107 | 0.88  | 0.20668 | 0.01015 | 0.02971 | 0.00074 | 0.05045 | 0.00239 | 0.28 | 190.77  | 8.56   | 8.52   | 188.75  | 4.61   | 4.61   | 215.74  | 111.57 | 107.87 | 188.75  | 4.61   | 4.61   | 206Pb/238U concordant scans    | 28 | 31 |
| P1413_004_Zm_A_1_M80_40  | 624  | 198  | 3.15  | 0.21409 | 0.01313 | 0.03127 | 0.00115 | 0.04966 | 0.00283 | 0.39 | 196.98  | 11.01  | 10.95  | 198.49  | 7.21   | 7.21   | 178.94  | 135.84 | 130.42 | 198.49  | 7.21   | 7.21   | 206Pb/238U concordant scans    | 21 | 31 |
| P1413_004_Zm_A_1_M80_26  | 568  | 282  | 2.02  | 0.22044 | 0.01368 | 0.03130 | 0.00125 | 0.05107 | 0.00282 | 0.47 | 202.28  | 11.42  | 11.35  | 198.71  | 7.79   | 7.79   | 244.05  | 129.97 | 124.97 | 198.71  | 7.79   | 7.79   | 206Pb/238U concordant scans    | 27 | 31 |
| P1413_004_Zm_A_1_M80_91  | 632  | 291  | 2.17  | 0.22126 | 0.01224 | 0.03155 | 0.00109 | 0.05087 | 0.00263 | 0.39 | 202.96  | 10.20  | 10.15  | 200.23  | 6.79   | 6.78   | 234.75  | 121.61 | 117.23 | 200.23  | 6.79   | 6.78   | 206Pb/238U concordant scans    | 22 | 31 |
| P1413_004_Zm_A_1_M80_93  | 146  | 92   | 1.59  | 0.22798 | 0.02950 | 0.03200 | 0.00124 | 0.05167 | 0.00664 | 0.16 | 208.53  | 24.54  | 24.24  | 203.07  | 7.72   | 7.71   | 270.79  | 309.01 | 282.14 | 203.07  | 7.72   | 7.71   | 206Pb/238U concordant scans    | 22 | 31 |
| P1413_004_Zm_A_1_M80_103 | 299  | 127  | 2.35  | 0.23743 | 0.01845 | 0.03313 | 0.00140 | 0.05198 | 0.00391 | 0.32 | 216.31  | 15.19  | 15.08  | 210.10  | 8.75   | 8.74   | 284.46  | 176.58 | 167.46 | 210.10  | 8.75   | 8.74   | 206Pb/238U concordant scans    | 24 | 31 |
| P1413_004_Zm_A_1_M80_23  | 162  | 68   | 2.36  | 0.24290 | 0.02749 | 0.03339 | 0.00122 | 0.05277 | 0.00582 | 0.23 | 220.79  | 22.58  | 22.33  | 211.71  | 7.61   | 7.60   | 318.77  | 260.94 | 241.46 | 211.71  | 7.61   | 7.60   | 206Pb/238U concordant scans    | 16 | 31 |
| P1413_004_Zm_A_1_M80_18  | 400  | 155  | 2.58  | 0.24813 | 0.01617 | 0.03585 | 0.00121 | 0.05019 | 0.00309 | 0.35 | 225.06  | 13.19  | 13.11  | 227.08  | 7.53   | 7.53   | 204.00  | 145.84 | 139.60 | 227.08  | 7.53   | 7.53   | 206Pb/238U concordant scans    | 26 | 31 |
| P1413_004_Zm_A_1_M80_32  | 614  | 143  | 4.29  | 0.29518 | 0.01601 | 0.04013 | 0.00143 | 0.05334 | 0.00279 | 0.35 | 262.63  | 12.59  | 12.51  | 253.65  | 8.89   | 8.89   | 343.49  | 120.38 | 116.05 | 253.65  | 8.89   | 8.89   | 206Pb/238U concordant scans    | 25 | 31 |
| P1413_004_Zm_A_1_M80_34  | 737  | 54   | 13.53 | 0.34677 | 0.02170 | 0.04533 | 0.00169 | 0.05548 | 0.00314 | 0.44 | 302.29  | 16.43  | 16.30  | 285.80  | 10.43  | 10.42  | 431.56  | 128.53 | 123.59 | 285.80  | 10.43  | 10.42  | 206Pb/238U concordant scans    | 31 | 31 |
| P1413_004_Zm_A_1_M80_98  | 305  | 112  | 2.72  | 0.39326 | 0.02923 | 0.05325 | 0.00268 | 0.05356 | 0.00348 | 0.50 | 336.75  | 21.41  | 21.19  | 334.44  | 16.41  | 16.39  | 352.70  | 150.28 | 143.59 | 334.44  | 16.41  | 16.39  | 206Pb/238U concordant scans    | 10 | 31 |
| P1413_004_Zm_A_1_M80_88  | 175  | 76   | 2.30  | 0.48136 | 0.03725 | 0.06514 | 0.00186 | 0.05360 | 0.00401 | 0.26 | 399.01  | 25.69  | 25.37  | 406.80  | 11.25  | 11.24  | 354.09  | 173.54 | 164.68 | 406.80  | 11.25  | 11.24  | 206Pb/238U concordant scans    | 28 | 31 |
| P1413_004_Zm_A_1_M80_49  | 187  | 76   | 2.46  | 0.66474 | 0.04860 | 0.08347 | 0.00340 | 0.05776 | 0.00388 | 0.41 | 517.51  | 29.86  | 29.43  | 516.78  | 20.24  | 20.20  | 520.72  | 151.07 | 144.25 | 516.78  | 20.24  | 20.20  | 206Pb/238U concordant scans    | 27 | 31 |
| P1413_004_Zm_A_1_M80_39  | 379  | 220  | 1.72  | 0.84810 | 0.04576 | 0.09879 | 0.00353 | 0.06226 | 0.00286 | 0.53 | 623.61  | 25.30  | 24.99  | 607.32  | 20.73  | 20.70  | 683.16  | 99.54  | 96.50  | 607.32  | 20.73  | 20.70  | 206Pb/238U concordant scans    | 29 | 31 |
| P1413_004_Zm_A_1_M80_86  | 59   | 13   | 4.60  | 0.89004 | 0.09925 | 0.09460 | 0.00925 | 0.06823 | 0.00762 | 0.43 | 646.39  | 54.03  | 52.63  | 582.71  | 54.59  | 54.36  | 875.65  | 240.05 | 222.92 | 646.39  | 54.03  | 52.63  | 207Pb/235Uc concordant scans   | 21 | 31 |
| P1413_004_Zm_A_1_M80_54  | 102  | 53   | 1.93  | 2.22504 | 0.59738 | 0.18200 | 0.03833 | 0.08867 | 0.01771 | 0.68 | 1188.96 | 197.37 | 179.87 | 1077.87 | 210.78 | 207.38 | 1397.03 | 409.24 | 360.56 | 1188.96 | 197.37 | 179.87 | 207Pb/235Uc concordant scans   | 2  | 31 |
| P1413_004_Zm_A_1_M80_7   | 696  | 225  | 3.10  | 4.00986 | 0.18599 | 0.28859 | 0.01217 | 0.10078 | 0.00342 | 0.69 | 1636.20 | 38.05  | 37.35  | 1634.46 | 61.01  | 60.72  | 1638.44 | 63.63  | 62.31  | 1636.20 | 38.05  | 37.35  | 207Pb/235Uc concordant scans   | 31 | 31 |
| P1413_004_Zm_A_1_M80_17  | 68   | 89   | 0.76  | 4.84164 | 0.23843 | 0.30829 | 0.01026 | 0.11390 | 0.00480 | 0.52 | 1792.16 | 41.87  | 41.03  | 1732.27 | 50.64  | 50.44  | 1862.61 | 77.12  | 75.17  | 1792.16 | 41.87  | 41.03  | 207Pb/235Uc concordant scans   | 25 | 31 |
| P1413_004_Zm_A_1_M80_20  | 46   | 61   | 0.76  | 5.78318 | 0.30345 | 0.35419 | 0.01184 | 0.11842 | 0.00536 | 0.51 | 1943.90 | 45.94  | 44.92  | 1954.60 | 56.47  | 56.23  | 1932.51 | 82.12  | 79.90  | 1943.90 | 45.94  | 44.92  | 207Pb/235Uc concordant scans   | 29 | 31 |
| P1413_004_Zm_A_1_M80_1   | 219  | 77   | 2.86  | 0.00000 | 0.00000 | 0.00000 | 0.00000 | 0.00000 | 0.00000 | 0.00 | 0.00    | 0.00   | 0.00   | 0.00    | 0.00   | 0.00   | 0.00    | 0.00   | 0.00   | 0.00    | 0.00   | 0.00   | Pbc-corrected isotopic sums    | 0  | 31 |
| P1413_004_Zm_A_1_M80_0   | 0    | 0    | 0.00  | 0.00000 | 0.00000 | 0.00000 | 0.00000 | 0.00000 | 0.00000 | 0.00 | 0.00    | 0.00   | 0.00   | 0.00    | 0.00   | 0.00   | 0.00    | 0.00   | 0.00   | 0.00    | 0.00   | 0.00   | failed                         | 0  | 0  |
| P1413_004_Zm_A_1_M80_1   | 0    | 0    | 0.00  | 0.00000 | 0.00000 | 0.00000 | 0.00000 | 0.00000 | 0.00000 | 0.00 | 0.00    | 0.00   | 0.00   | 0.00    | 0.00   | 0.00   | 0.00    | 0.00   | 0.00   | 0.00    | 0.00   | 0.00   | failed                         | 0  | 0  |
| P1413_004_Zm_A_1_M80_2   | 0    | 0    | 0.00  | 0.00000 | 0.00000 | 0.00000 | 0.00000 | 0.00000 | 0.00000 | 0.00 | 0.00    | 0.00   | 0.00   | 0.00    | 0.00   | 0.00   | 0.00    | 0.00   | 0.00   | 0.00    | 0.00   | 0.00   | failed                         | 0  | 0  |
| P1413_004_Zm_A_1_M80_87  | 0    | 0    | 0.00  | 0.00000 | 0.00000 | 0.00000 | 0.00000 | 0.00000 | 0.00000 | 0.00 | 0.00    | 0.00   | 0.00   | 0.00    | 0.00   | 0.00   | 0.00    | 0.00   | 0.00   | 0.00    | 0.00   | 0.00   | failed                         | 0  | 0  |
| P1413_004_Zm_A_1_M80_106 | 771  | 332  | 2.32  | 0.06272 | 0.04030 | 0.01065 | 0.00147 | 0.04272 | 0.02717 | 0.16 | 61.76   | 38.88  | 38.15  | 68.28   | 9.40   | 9.39   | 0.00    | 0.00   | 928.32 | 0.00    | 0.00   | 0.00   | Pbc-corrected concordant scans | 4  | 31 |

|             |         |
|-------------|---------|
| Mineral     | Zircon  |
| Sample Name | 01DOB   |
| AZZ Name    | 1413-01 |

| Analysis                  | Uranium and Thorium |            |                   |         | Concordant Scans: Isotopic Ratios |         |            |         |             |         |        | Concordant Scans: Ages |            |         |         |            |         |         | Preferred Age |         |         | Age Type | Concordant                  | Total Scans |                             |         |         |  |
|---------------------------|---------------------|------------|-------------------|---------|-----------------------------------|---------|------------|---------|-------------|---------|--------|------------------------|------------|---------|---------|------------|---------|---------|---------------|---------|---------|----------|-----------------------------|-------------|-----------------------------|---------|---------|--|
|                           | [U] (ppm)           | [Th] (ppm) | [Th]/[U] (x10^-3) |         | 207Pb/235U                        | 2 sigma | 206Pb/238U | 2 sigma | 207Pb/206Pb | 2 sigma | Error  | Correlation            | 207Pb/235U | 2 sigma | 2 sigma | 206Pb/238U | 2 sigma | 2 sigma | 207Pb/206Pb   | 2 sigma | 2 sigma |          |                             |             | Preferred Age (Ma)          | 2 sigma | 2 sigma |  |
| P1413_001_Zm_A_1_MBD_1180 | 83                  | 2          | 38.94             | 0.00000 | 0.00000                           | 0.00000 | 0.00000    | 0.00000 | 0.00000     | 0.00    | 0.00   | 0.00                   | 0.00       | 0.00    | 0.00    | 0.00       | 0.00    | 0.00    | 0.00          | 0.00    | 0.00    | 52.35    | 13.99                       | 18.66       | Pbc-corrected isotopic sums | 0       | 31      |  |
| P1413_001_Zm_A_1_MBD_87   | 141                 | 41         | 3.44              | 0.05851 | 0.02016                           | 0.00856 | 0.00074    | 0.04958 | 0.01729     | 0.07    | 57.73  | 19.43                  | 19.25      | 54.94   | 4.74    | 4.74       | 175.15  | 350.29  | 725.91        | 54.94   | 4.74    | 4.74     | 206Pb/238U concordant scans | 15          | 31                          |         |         |  |
| P1413_001_Zm_A_1_MBD_15   | 1748                | 625        | 28.00             | 0.05848 | 0.04496                           | 0.00864 | 0.00030    | 0.04907 | 0.00398     | 0.30    | 57.70  | 4.76                   | 4.75       | 55.47   | 1.91    | 1.91       | 151.24  | 195.71  | 184.66        | 55.47   | 1.91    | 1.91     | 206Pb/238U concordant scans | 23          | 31                          |         |         |  |
| P1413_001_Zm_A_1_MBD_62   | 116                 | 38         | 3.08              | 0.08133 | 0.03466                           | 0.00871 | 0.00075    | 0.06776 | 0.02926     | 0.03    | 79.39  | 32.81                  | 32.29      | 55.87   | 4.77    | 4.77       | 861.14  | 1053.98 | 787.30        | 55.87   | 4.77    | 4.77     | 206Pb/238U concordant scans | 9           | 31                          |         |         |  |
| P1413_001_Zm_A_1_MBD_44   | 4862                | 1844       | 26.46             | 0.05967 | 0.00318                           | 0.00885 | 0.00025    | 0.04988 | 0.00246     | 0.35    | 58.85  | 3.05                   | 3.05       | 56.82   | 1.62    | 1.62       | 142.24  | 120.25  | 115.99        | 56.82   | 1.62    | 1.62     | 206Pb/238U concordant scans | 31          | 31                          |         |         |  |
| P1413_001_Zm_A_1_MBD_75   | 832                 | 247        | 3.37              | 0.06225 | 0.00500                           | 0.00903 | 0.00034    | 0.04988 | 0.00400     | 0.22    | 61.32  | 4.78                   | 4.77       | 57.97   | 2.14    | 2.14       | 194.06  | 191.36  | 180.75        | 57.97   | 2.14    | 2.14     | 206Pb/238U concordant scans | 18          | 31                          |         |         |  |
| P1413_001_Zm_A_1_MBD_88   | 864                 | 194        | 4.45              | 0.05977 | 0.00763                           | 0.00909 | 0.00031    | 0.04772 | 0.00605     | 0.15    | 58.95  | 7.32                   | 7.29       | 58.30   | 1.96    | 1.96       | 85.18   | 170.37  | 287.59        | 58.30   | 1.96    | 1.96     | 206Pb/238U concordant scans | 19          | 31                          |         |         |  |
| P1413_001_Zm_A_1_MBD_28   | 341                 | 108        | 3.14              | 0.06327 | 0.00788                           | 0.00913 | 0.00046    | 0.05026 | 0.00637     | 0.15    | 62.29  | 7.54                   | 7.51       | 58.59   | 2.93    | 2.93       | 206.98  | 307.90  | 281.31        | 58.59   | 2.93    | 2.93     | 206Pb/238U concordant scans | 24          | 31                          |         |         |  |
| P1413_001_Zm_A_1_MBD_92   | 140                 | 34         | 4.10              | 0.07018 | 0.01520                           | 0.00932 | 0.00054    | 0.05460 | 0.01205     | 0.05    | 68.87  | 14.47                  | 14.37      | 59.82   | 3.43    | 3.42       | 395.70  | 536.99  | 460.13        | 59.82   | 3.43    | 3.42     | 206Pb/238U concordant scans | 19          | 31                          |         |         |  |
| P1413_001_Zm_A_1_MBD_96   | 1087                | 300        | 3.62              | 0.06159 | 0.01345                           | 0.00939 | 0.00045    | 0.04760 | 0.01045     | 0.08    | 60.69  | 12.90                  | 12.82      | 60.22   | 2.90    | 2.90       | 79.28   | 158.56  | 483.95        | 60.22   | 2.90    | 2.90     | 206Pb/238U concordant scans | 21          | 31                          |         |         |  |
| P1413_001_Zm_A_1_MBD_52   | 654                 | 153        | 4.28              | 0.07090 | 0.00954                           | 0.00954 | 0.00029    | 0.05387 | 0.00719     | 0.14    | 69.55  | 9.06                   | 9.02       | 61.24   | 1.87    | 1.86       | 365.71  | 315.94  | 287.74        | 61.24   | 1.87    | 1.86     | 206Pb/238U concordant scans | 16          | 31                          |         |         |  |
| P1413_001_Zm_A_1_MBD_93   | 124                 | 49         | 2.55              | 0.12110 | 0.01038                           | 0.00966 | 0.00232    | 0.00939 | 0.07964     | 0.04    | 116.07 | 95.67                  | 91.37      | 61.97   | 14.79   | 14.78      | 1445.08 | 2398.89 | 1325.91       | 61.97   | 14.79   | 14.78    | 206Pb/238U concordant scans | 7           | 31                          |         |         |  |
| P1413_001_Zm_A_1_MBD_68   | 104                 | 32         | 3.21              | 0.06451 | 0.01814                           | 0.01014 | 0.00041    | 0.04615 | 0.01298     | 0.06    | 63.47  | 17.38                  | 17.23      | 65.02   | 2.62    | 2.61       | 5.41    | 10.63   | 61.81         | 65.02   | 2.62    | 2.61     | 206Pb/238U concordant scans | 23          | 31                          |         |         |  |
| P1413_001_Zm_A_1_MBD_38   | 642                 | 713        | 0.900             | 0.06864 | 0.00859                           | 0.01023 | 0.00074    | 0.04865 | 0.00549     | 0.45    | 67.41  | 8.18                   | 8.15       | 65.64   | 4.71    | 4.71       | 130.84  | 261.69  | 255.24        | 65.64   | 4.71    | 4.71     | 206Pb/238U concordant scans | 23          | 31                          |         |         |  |
| P1413_001_Zm_A_1_MBD_40   | 115                 | 48         | 2.40              | 0.06820 | 0.02479                           | 0.01028 | 0.00086    | 0.04811 | 0.01784     | 0.02    | 66.99  | 23.70                  | 23.42      | 65.94   | 5.48    | 5.48       | 104.58  | 209.15  | 776.16        | 65.94   | 5.48    | 5.48     | 206Pb/238U concordant scans | 14          | 31                          |         |         |  |
| P1413_001_Zm_A_1_MBD_72   | 95                  | 49         | 1.96              | 0.07775 | 0.02636                           | 0.01033 | 0.00068    | 0.05459 | 0.01862     | 0.06    | 76.03  | 24.99                  | 24.68      | 66.25   | 4.33    | 4.32       | 395.65  | 791.30  | 685.47        | 66.25   | 4.33    | 4.32     | 206Pb/238U concordant scans | 17          | 31                          |         |         |  |
| P1413_001_Zm_A_1_MBD_116  | 417                 | 333        | 1.25              | 0.06945 | 0.01430                           | 0.01034 | 0.00066    | 0.04872 | 0.01029     | 0.06    | 68.17  | 13.62                  | 13.53      | 66.30   | 4.19    | 4.19       | 134.40  | 268.80  | 462.12        | 66.30   | 4.19    | 4.19     | 206Pb/238U concordant scans | 5           | 31                          |         |         |  |
| P1413_001_Zm_A_1_MBD_58   | 316                 | 126        | 2.50              | 0.07494 | 0.01209                           | 0.01046 | 0.00041    | 0.05195 | 0.00852     | 0.04    | 73.37  | 11.45                  | 11.39      | 67.09   | 2.61    | 2.61       | 283.33  | 398.71  | 355.02        | 67.09   | 2.61    | 2.61     | 206Pb/238U concordant scans | 24          | 31                          |         |         |  |
| P1413_001_Zm_A_1_MBD_6    | 99                  | 42         | 2.35              | 0.09170 | 0.03861                           | 0.01047 | 0.00086    | 0.06352 | 0.02684     | 0.08    | 89.08  | 36.23                  | 35.60      | 67.15   | 5.51    | 5.51       | 725.58  | 1052.06 | 787.87        | 67.15   | 5.51    | 5.51     | 206Pb/238U concordant scans | 12          | 31                          |         |         |  |
| P1413_001_Zm_A_1_MBD_84   | 85                  | 37         | 2.28              | 0.09044 | 0.02536                           | 0.01054 | 0.00073    | 0.06222 | 0.01763     | 0.08    | 87.91  | 23.76                  | 23.48      | 67.60   | 4.63    | 4.63       | 681.63  | 671.22  | 553.44        | 67.60   | 4.63    | 4.63     | 206Pb/238U concordant scans | 25          | 31                          |         |         |  |
| P1413_001_Zm_A_1_MBD_31   | 69                  | 21         | 3.21              | 0.07177 | 0.02211                           | 0.01055 | 0.00090    | 0.04932 | 0.01549     | 0.06    | 70.38  | 21.06                  | 20.84      | 67.68   | 5.73    | 5.73       | 163.11  | 326.21  | 662.02        | 67.68   | 5.73    | 5.73     | 206Pb/238U concordant scans | 15          | 31                          |         |         |  |
| P1413_001_Zm_A_1_MBD_74   | 220                 | 134        | 1.65              | 0.09408 | 0.04533                           | 0.01058 | 0.00094    | 0.06451 | 0.03110     | 0.09    | 91.29  | 42.51                  | 41.64      | 67.82   | 6.01    | 6.00       | 758.53  | 1224.91 | 880.11        | 67.82   | 6.01    | 6.00     | 206Pb/238U concordant scans | 3           | 31                          |         |         |  |
| P1413_001_Zm_A_1_MBD_24   | 226                 | 92         | 2.44              | 0.07597 | 0.01683                           | 0.01058 | 0.00049    | 0.05206 | 0.01156     | 0.09    | 74.35  | 15.95                  | 15.82      | 67.87   | 3.12    | 3.12       | 287.99  | 551.69  | 471.37        | 67.87   | 3.12    | 3.12     | 206Pb/238U concordant scans | 19          | 31                          |         |         |  |
| P1413_001_Zm_A_1_MBD_102  | 1671                | 1640       | 1.02              | 0.07031 | 0.04006                           | 0.01059 | 0.00028    | 0.04813 | 0.00276     | 0.20    | 68.99  | 3.86                   | 3.85       | 67.94   | 1.81    | 1.81       | 105.61  | 138.53  | 132.92        | 67.94   | 1.81    | 1.81     | 206Pb/238U concordant scans | 23          | 31                          |         |         |  |
| P1413_001_Zm_A_1_MBD_32   | 152                 | 52         | 2.95              | 0.07047 | 0.01528                           | 0.01062 | 0.00062    | 0.04833 | 0.01063     | 0.06    | 69.14  | 14.55                  | 14.44      | 68.10   | 3.94    | 3.94       | 105.48  | 210.96  | 484.03        | 68.10   | 3.94    | 3.94     | 206Pb/238U concordant scans | 9           | 31                          |         |         |  |
| P1413_001_Zm_A_1_MBD_26   | 60                  | 21         | 2.92              | 0.08818 | 0.03404                           | 0.01065 | 0.00118    | 0.06007 | 0.02387     | 0.04    | 85.81  | 32.01                  | 31.52      | 68.27   | 7.56    | 7.56       | 605.98  | 1000.58 | 760.09        | 68.27   | 7.56    | 7.56     | 206Pb/238U concordant scans | 12          | 31                          |         |         |  |
| P1413_001_Zm_A_1_MBD_25   | 2582                | 1889       | 1.37              | 0.07107 | 0.00526                           | 0.01065 | 0.00043    | 0.04840 | 0.00340     | 0.35    | 69.71  | 5.00                   | 4.98       | 68.29   | 2.73    | 2.73       | 118.94  | 169.96  | 161.58        | 68.29   | 2.73    | 2.73     | 206Pb/238U concordant scans | 21          | 31                          |         |         |  |
| P1413_001_Zm_A_1_MBD_2    | 291                 | 140        | 2.08              | 0.07400 | 0.01297                           | 0.01066 | 0.00065    | 0.05034 | 0.00884     | 0.16    | 72.49  | 12.30                  | 12.22      | 68.36   | 4.16    | 4.16       | 210.89  | 421.78  | 383.58        | 68.36   | 4.16    | 4.16     | 206Pb/238U concordant scans | 19          | 31                          |         |         |  |
| P1413_001_Zm_A_1_MBD_59   | 107                 | 39         | 2.76              | 0.07537 | 0.02067                           | 0.01071 | 0.00110    | 0.05103 | 0.01482     | 0.02    | 73.78  | 19.61                  | 19.43      | 68.69   | 6.99    | 6.99       | 242.04  | 484.08  | 608.31        | 68.69   | 6.99    | 6.99     | 206Pb/238U concordant scans | 16          | 31                          |         |         |  |
| P1413_001_Zm_A_1_MBD_9    | 253                 | 114        | 2.21              | 0.07441 | 0.01247                           | 0.01077 | 0.00044    | 0.05010 | 0.00853     | 0.04    | 72.87  | 11.82                  | 11.75      | 69.69   | 2.81    | 2.81       | 199.59  | 399.17  | 373.13        | 69.69   | 2.81    | 2.81     | 206Pb/238U concordant scans | 20          | 31                          |         |         |  |
| P1413_001_Zm_A_1_MBD_64   | 1413                | 916        | 1.54              | 0.07357 | 0.00658                           | 0.01079 | 0.00041    | 0.04944 | 0.00439     | 0.22    | 72.08  | 6.24                   | 6.22       | 69.21   | 2.64    | 2.64       | 168.61  | 214.31  | 201.11        | 69.21   | 2.64    | 2.64     | 206Pb/238U concordant scans | 14          | 31                          |         |         |  |
| P1413_001_Zm_A_1_MBD_70   | 72                  | 24         | 2.96              | 0.07598 | 0.02906                           | 0.01080 | 0.00068    | 0.05103 | 0.01930     | 0.02    | 74.36  | 27.61                  | 27.24      | 69.24   | 4.33    | 4.33       | 242.25  | 484.50  | 785.70        | 69.24   | 4.33    | 4.33     | 206Pb/238U concordant scans | 21          | 31                          |         |         |  |
| P1413_001_Zm_A_1_MBD_16   | 191                 | 160        | 2.44              | 0.08300 | 0.01463                           | 0.01080 | 0.00107    | 0.05583 | 0.00985     | 0.19    | 84.96  | 13.76                  | 13.67      | 69.26   | 4.76    | 4.76       | 441.73  | 419.10  | 370.70        | 69.26   | 4.76    | 4.76     | 206Pb/238U concordant scans | 11          | 31                          |         |         |  |
| P1413_001_Zm_A_1_MBD_85   | 36                  | 44         | 2.19              | 0.07661 | 0.02514                           | 0.01092 | 0.00105    | 0.05078 | 0.01715     | 0.06    | 79.96  | 23.85                  | 23.57      | 70.02   | 6.92    | 6.92       | 235.20  | 470.39  | 696.84        | 70.02   | 6.92    | 6.92     | 206Pb/238U concordant scans | 13          | 31                          |         |         |  |
| P1413_001_Zm_A_1_MBD_55   | 197                 | 97         | 2.04              | 0.08234 | 0.02530                           | 0.01097 | 0.00087    | 0.05443 | 0.01715     | 0.02    | 80.34  | 23.87                  | 23.59      | 70.34   | 5.54    | 5.54       | 388.86  | 777.72  | 639.16        | 70.34   | 5.54    | 5.54     | 206Pb/238U concordant scans | 7           | 31                          |         |         |  |
| P1413_001_Zm_A_1_MBD_89   | 285                 | 138        | 2.06              | 0.07376 | 0.01300                           | 0.01099 | 0.00048    | 0.04867 | 0.00862     | 0.09    | 72.26  | 12.33                  | 12.25      | 70.47   | 3.09    | 3.09       | 131.90  | 263.80  | 392.02        | 70.47   | 3.09    | 3.09     | 206Pb/238U concordant scans | 14          | 31                          |         |         |  |
| P1413_001_Zm_A_1_MBD_48   | 133                 | 55         | 2.42              | 0.09156 | 0.02206                           | 0.01102 | 0.00102    | 0.05228 | 0.01522     | 0.01    | 77.64  | 20.86                  | 20.65      | 70.67   | 6.51    | 6.50       | 297.69  | 595.38  | 603.75        | 70.67   | 6.51    | 6.50     | 206Pb/238U concordant scans | 14          | 31                          |         |         |  |
| P1413_001_Zm_A_1_MBD_111  | 367                 | 152        | 2.41              | 0.09541 | 0.04437                           | 0.01103 | 0.00067    | 0.06018 | 0.02935     | 0.01    | 88.91  | 41.70                  | 40.87      | 70.70   | 4.26    | 4.26       | 610.09  | 1220.18 | 909.10        | 70.70   | 4.26    | 4.26     | 206Pb/238U concordant scans | 20          | 31                          |         |         |  |
| P1413_001_Zm_A_1_MBD_98   | 61                  | 25         | 2.48              | 0.09681 | 0.03412                           | 0.01106 | 0.00098    | 0.06348 | 0.02290     | 0.03    | 94.83  | 31.83                  | 31.34      | 70.91   | 6.26    | 6.26       | 724.41  | 875.25  | 684.55        | 70.91   | 6.26    | 6.26     | 206Pb/238U concordant scans | 18          | 31                          |         |         |  |
| P1413_001_Zm_A_1_MBD_35   | 206                 | 55         | 3.74              | 0.07635 | 0.01469                           | 0.01109 | 0.00097    | 0.04993 | 0.01039     | 0.03    | 74.71  | 13.90                  | 13.81      | 71.01   | 6.18    | 6.17       | 191.72  | 383.44  | 451.26        | 71.01   | 6.18    | 6.17     | 206Pb/238U concordant scans | 9           | 31                          |         |         |  |
| P1413_001_Zm_A_1_MBD_18   | 246                 | 66         | 3.75              | 0.08511 | 0.02485                           | 0.01115 | 0.00066    | 0.05536 | 0.01621     | 0.09    | 82.94  | 23.39                  | 23.12      | 71.49   | 4.22    | 4.21       | 426.61  | 729.24  | 594.07        | 71.49   | 4.22    | 4.21     |                             |             |                             |         |         |  |

|                          |      |     |       |         |         |         |         |         |         |      |         |        |        |         |        |        |         |        |        |         |        |        |                                |    |    |
|--------------------------|------|-----|-------|---------|---------|---------|---------|---------|---------|------|---------|--------|--------|---------|--------|--------|---------|--------|--------|---------|--------|--------|--------------------------------|----|----|
| P1413_001_Zm_A_1_M80_36  | 1023 | 414 | 2.47  | 0.10443 | 0.00814 | 0.01512 | 0.00037 | 0.05008 | 0.00391 | 0.13 | 100.86  | 7.50   | 7.47   | 96.77   | 2.38   | 2.38   | 198.68  | 186.43 | 176.35 | 96.77   | 2.38   | 2.38   | 206Pb/238U concordant scans    | 22 | 31 |
| P1413_001_Zm_A_1_M80_46  | 61   | 109 | 0.56  | 0.00000 | 0.00000 | 0.00000 | 0.00000 | 0.00000 | 0.00000 | 0.00 | 0.00    | 0.00   | 0.00   | 0.00    | 0.00   | 0.00   | 0.00    | 0.00   | 0.00   | 96.94   | 19.62  | 33.83  | Pbc-corrected isotopic sums    | 0  | 31 |
| P1413_001_Zm_A_1_M80_41  | 365  | 102 | 3.58  | 0.10433 | 0.00972 | 0.01526 | 0.00053 | 0.04958 | 0.00470 | 0.12 | 100.76  | 8.96   | 8.92   | 97.65   | 3.34   | 3.34   | 175.12  | 229.11 | 214.09 | 97.65   | 3.34   | 3.34   | 206Pb/238U concordant scans    | 16 | 31 |
| P1413_001_Zm_A_1_M80_11  | 1567 | 746 | 2.10  | 0.10532 | 0.00574 | 0.01539 | 0.00035 | 0.04963 | 0.00273 | 0.14 | 101.67  | 5.28   | 5.26   | 98.45   | 2.20   | 2.20   | 177.78  | 130.73 | 125.69 | 98.45   | 2.20   | 2.20   | 206Pb/238U concordant scans    | 22 | 31 |
| P1413_001_Zm_A_1_M80_9   | 1222 | 449 | 2.72  | 0.10641 | 0.00851 | 0.01540 | 0.00069 | 0.05012 | 0.00374 | 0.39 | 102.67  | 7.83   | 7.80   | 98.50   | 4.40   | 4.40   | 200.65  | 178.15 | 168.92 | 98.50   | 4.40   | 4.40   | 206Pb/238U concordant scans    | 23 | 31 |
| P1413_001_Zm_A_1_M80_30  | 237  | 51  | 4.68  | 0.10563 | 0.01934 | 0.01544 | 0.00120 | 0.04962 | 0.00950 | 0.10 | 101.96  | 17.84  | 17.68  | 98.76   | 7.60   | 7.59   | 177.33  | 354.66 | 418.13 | 98.76   | 7.60   | 7.59   | 206Pb/238U concordant scans    | 16 | 31 |
| P1413_001_Zm_A_1_M80_41  | 1102 | 243 | 4.53  | 0.10531 | 0.00958 | 0.01544 | 0.00084 | 0.04946 | 0.00381 | 0.53 | 101.67  | 8.82   | 8.79   | 98.80   | 5.32   | 5.32   | 169.47  | 185.11 | 175.18 | 98.80   | 5.32   | 5.32   | 206Pb/238U concordant scans    | 16 | 31 |
| P1413_001_Zm_A_1_M80_71  | 482  | 151 | 3.19  | 0.10155 | 0.01036 | 0.01545 | 0.00055 | 0.04767 | 0.00485 | 0.16 | 98.20   | 9.57   | 9.53   | 98.84   | 3.47   | 3.47   | 82.78   | 165.56 | 233.06 | 98.84   | 3.47   | 3.47   | 206Pb/238U concordant scans    | 18 | 31 |
| P1413_001_Zm_A_1_M80_105 | 1331 | 539 | 2.47  | 0.10368 | 0.00655 | 0.01569 | 0.00040 | 0.04791 | 0.00293 | 0.26 | 100.16  | 6.03   | 6.02   | 100.39  | 2.55   | 2.55   | 94.81   | 147.84 | 141.47 | 100.39  | 2.55   | 2.55   | 206Pb/238U concordant scans    | 15 | 31 |
| P1413_001_Zm_A_1_M80_107 | 2832 | 72  | 39.50 | 0.10470 | 0.00534 | 0.01570 | 0.00043 | 0.04836 | 0.00235 | 0.33 | 101.11  | 4.91   | 4.90   | 100.44  | 2.70   | 2.70   | 116.83  | 116.43 | 112.44 | 100.44  | 2.70   | 2.70   | 206Pb/238U concordant scans    | 16 | 31 |
| P1413_001_Zm_A_1_M80_7   | 2051 | 793 | 2.59  | 0.10664 | 0.00657 | 0.01573 | 0.00077 | 0.04916 | 0.00246 | 0.61 | 102.89  | 6.04   | 6.02   | 100.64  | 4.91   | 4.91   | 155.27  | 119.31 | 115.11 | 100.64  | 4.91   | 4.91   | 206Pb/238U concordant scans    | 18 | 31 |
| P1413_001_Zm_A_1_M80_8   | 915  | 384 | 2.39  | 0.11194 | 0.00970 | 0.01631 | 0.00064 | 0.04978 | 0.00411 | 0.32 | 107.73  | 8.87   | 8.83   | 104.29  | 4.04   | 4.04   | 184.60  | 198.34 | 186.98 | 104.29  | 4.04   | 4.04   | 206Pb/238U concordant scans    | 18 | 31 |
| P1413_001_Zm_A_1_M80_54  | 707  | 286 | 2.47  | 0.12741 | 0.01404 | 0.01684 | 0.00073 | 0.05489 | 0.00604 | 0.19 | 121.77  | 12.69  | 12.61  | 107.63  | 4.60   | 4.60   | 407.59  | 256.01 | 237.13 | 107.63  | 4.60   | 4.60   | 206Pb/238U concordant scans    | 11 | 31 |
| P1413_001_Zm_A_1_M80_79  | 16   | 4   | 4.34  | 0.00000 | 0.00000 | 0.00000 | 0.00000 | 0.00000 | 0.00000 | 0.00 | 0.00    | 0.00   | 0.00   | 0.00    | 0.00   | 0.00   | 0.00    | 0.00   | 0.00   | 109.14  | 71.77  | 70.92  | Pbc-corrected isotopic sums    | 0  | 31 |
| P1413_001_Zm_A_1_M80_49  | 1097 | 297 | 3.69  | 0.12159 | 0.00696 | 0.01774 | 0.00057 | 0.04972 | 0.00273 | 0.33 | 116.51  | 6.31   | 6.29   | 113.34  | 3.62   | 3.62   | 181.86  | 130.32 | 125.32 | 113.34  | 3.62   | 3.62   | 206Pb/238U concordant scans    | 21 | 31 |
| P1413_001_Zm_A_1_M80_109 | 75   | 36  | 2.07  | 0.16882 | 0.03189 | 0.02401 | 0.00133 | 0.05099 | 0.00989 | 0.04 | 158.39  | 27.89  | 27.51  | 152.97  | 8.39   | 8.39   | 240.32  | 480.44 | 418.99 | 152.97  | 8.39   | 8.39   | 206Pb/238U concordant scans    | 23 | 31 |
| P1413_001_Zm_A_1_M80_101 | 1628 | 530 | 3.07  | 0.34916 | 0.01553 | 0.04849 | 0.00116 | 0.05222 | 0.00212 | 0.41 | 304.09  | 11.72  | 11.65  | 305.26  | 7.15   | 7.15   | 295.14  | 93.95  | 91.31  | 305.26  | 7.15   | 7.15   | 206Pb/238U concordant scans    | 26 | 31 |
| P1413_001_Zm_A_1_M80_1   | 665  | 301 | 2.21  | 0.49774 | 0.02458 | 0.06428 | 0.00161 | 0.05616 | 0.00260 | 0.35 | 410.17  | 16.73  | 16.59  | 401.60  | 9.74   | 9.73   | 458.73  | 104.47 | 101.17 | 401.60  | 9.74   | 9.73   | 206Pb/238U concordant scans    | 22 | 31 |
| P1413_001_Zm_A_1_M80_57  | 167  | 21  | 7.95  | 0.55530 | 0.04079 | 0.07190 | 0.00188 | 0.05602 | 0.00415 | 0.12 | 448.47  | 26.80  | 26.45  | 447.58  | 11.32  | 11.31  | 452.99  | 168.64 | 160.21 | 447.58  | 11.32  | 11.31  | 206Pb/238U concordant scans    | 25 | 31 |
| P1413_001_Zm_A_1_M80_100 | 982  | 371 | 2.64  | 0.69140 | 0.03138 | 0.08265 | 0.00246 | 0.06067 | 0.00269 | 0.32 | 533.64  | 18.92  | 18.75  | 511.90  | 14.66  | 14.64  | 627.67  | 96.87  | 94.00  | 511.90  | 14.66  | 14.64  | 206Pb/238U concordant scans    | 24 | 31 |
| P1413_001_Zm_A_1_M80_39  | 397  | 238 | 1.67  | 0.68726 | 0.02447 | 0.08547 | 0.00194 | 0.05832 | 0.00206 | 0.27 | 531.15  | 14.78  | 14.67  | 528.69  | 11.53  | 11.52  | 541.73  | 78.13  | 76.26  | 528.69  | 11.53  | 11.52  | 206Pb/238U concordant scans    | 24 | 31 |
| P1413_001_Zm_A_1_M80_22  | 3096 | 951 | 3.26  | 0.70951 | 0.02885 | 0.08342 | 0.00298 | 0.06168 | 0.00189 | 0.67 | 544.45  | 17.21  | 17.06  | 516.53  | 17.75  | 17.73  | 663.12  | 66.50  | 65.13  | 544.45  | 17.21  | 17.06  | 207Pb/235U concordant scans    | 16 | 31 |
| P1413_001_Zm_A_1_M80_99  | 56   | 55  | 1.01  | 0.00000 | 0.00000 | 0.00000 | 0.00000 | 0.00000 | 0.00000 | 0.00 | 0.00    | 0.00   | 0.00   | 0.00    | 0.00   | 0.00   | 0.00    | 0.00   | 0.00   | 562.57  | 159.81 | 140.99 | Pbc-corrected isotopic sums    | 0  | 31 |
| P1413_001_Zm_A_1_M80_106 | 685  | 617 | 1.11  | 0.80761 | 0.03299 | 0.09836 | 0.00255 | 0.05955 | 0.00224 | 0.40 | 601.11  | 18.62  | 18.45  | 604.81  | 14.97  | 14.95  | 587.18  | 82.65  | 80.56  | 604.81  | 14.97  | 14.95  | 206Pb/238U concordant scans    | 26 | 31 |
| P1413_001_Zm_A_1_M80_56  | 315  | 36  | 8.76  | 0.97750 | 0.05645 | 0.10724 | 0.00342 | 0.06611 | 0.00347 | 0.42 | 692.32  | 29.19  | 28.78  | 656.67  | 19.93  | 19.90  | 809.91  | 111.85 | 108.00 | 656.67  | 19.93  | 19.90  | 206Pb/238U concordant scans    | 20 | 31 |
| P1413_001_Zm_A_1_M80_65  | 783  | 516 | 1.52  | 0.96812 | 0.03951 | 0.11251 | 0.00335 | 0.06241 | 0.00240 | 0.40 | 687.49  | 20.49  | 20.28  | 687.29  | 19.40  | 19.37  | 688.16  | 83.01  | 80.88  | 687.29  | 19.40  | 19.37  | 206Pb/238U concordant scans    | 30 | 31 |
| P1413_001_Zm_A_1_M80_113 | 197  | 41  | 4.79  | 1.26867 | 0.08133 | 0.13053 | 0.00617 | 0.07049 | 0.00388 | 0.53 | 831.79  | 36.73  | 36.08  | 790.89  | 35.26  | 35.16  | 942.70  | 114.99 | 110.89 | 831.79  | 36.73  | 36.08  | 207Pb/235U concordant scans    | 9  | 31 |
| P1413_001_Zm_A_1_M80_95  | 586  | 255 | 2.29  | 1.55233 | 0.61354 | 0.13870 | 0.02322 | 0.08117 | 0.03253 | 0.17 | 951.42  | 260.04 | 230.49 | 837.33  | 132.10 | 130.76 | 1225.57 | 908.65 | 700.09 | 837.33  | 132.10 | 130.76 | 206Pb/238U concordant scans    | 1  | 31 |
| P1413_001_Zm_A_1_M80_91  | 118  | 46  | 2.59  | 1.82953 | 0.12244 | 0.17380 | 0.00525 | 0.07635 | 0.00474 | 0.37 | 1056.11 | 44.42  | 43.47  | 1033.01 | 28.88  | 28.82  | 1104.19 | 126.75 | 121.75 | 1033.01 | 28.88  | 28.82  | 206Pb/238U concordant scans    | 31 | 31 |
| P1413_001_Zm_A_1_M80_117 | 42   | 31  | 1.39  | 1.60653 | 0.14960 | 0.17405 | 0.00676 | 0.06694 | 0.00618 | 0.21 | 972.76  | 59.13  | 57.46  | 1034.41 | 37.17  | 37.06  | 836.00  | 198.47 | 186.64 | 1034.41 | 37.17  | 37.06  | 206Pb/238U concordant scans    | 29 | 31 |
| P1413_001_Zm_A_1_M80_53  | 152  | 122 | 1.24  | 4.70050 | 0.19362 | 0.30999 | 0.00978 | 0.10997 | 0.00358 | 0.62 | 1767.33 | 34.78  | 34.20  | 1740.67 | 48.21  | 48.03  | 1798.97 | 59.90  | 58.72  | 1767.33 | 34.78  | 34.20  | 207Pb/235U concordant scans    | 27 | 31 |
| P1413_001_Zm_A_1_M80_21  | 100  | 74  | 1.35  | 4.90772 | 0.20253 | 0.32189 | 0.01053 | 0.11058 | 0.00354 | 0.64 | 1803.59 | 35.11  | 34.51  | 1798.94 | 51.46  | 51.25  | 1808.96 | 58.68  | 57.55  | 1803.59 | 35.11  | 34.51  | 207Pb/235U concordant scans    | 26 | 31 |
| P1413_001_Zm_A_1_M80_90  | 214  | 147 | 1.46  | 5.20217 | 0.21973 | 0.32800 | 0.01025 | 0.11503 | 0.00421 | 0.52 | 1852.97 | 36.30  | 35.66  | 1828.69 | 49.84  | 49.64  | 1880.34 | 66.63  | 65.16  | 1852.97 | 36.30  | 35.66  | 207Pb/235U concordant scans    | 26 | 31 |
| P1413_001_Zm_A_1_M80_3   | 0    | 0   | 0.00  | 0.00000 | 0.00000 | 0.00000 | 0.00000 | 0.00000 | 0.00000 | 0.00 | 0.00    | 0.00   | 0.00   | 0.00    | 0.00   | 0.00   | 0.00    | 0.00   | 0.00   | 0.00    | 0.00   | 0.00   | failed                         | 0  | 0  |
| P1413_001_Zm_A_1_M80_10  | 0    | 0   | 0.00  | 0.00000 | 0.00000 | 0.00000 | 0.00000 | 0.00000 | 0.00000 | 0.00 | 0.00    | 0.00   | 0.00   | 0.00    | 0.00   | 0.00   | 0.00    | 0.00   | 0.00   | 0.00    | 0.00   | 0.00   | failed                         | 0  | 0  |
| P1413_001_Zm_A_1_M80_12  | 0    | 0   | 0.00  | 0.00000 | 0.00000 | 0.00000 | 0.00000 | 0.00000 | 0.00000 | 0.00 | 0.00    | 0.00   | 0.00   | 0.00    | 0.00   | 0.00   | 0.00    | 0.00   | 0.00   | 0.00    | 0.00   | 0.00   | failed                         | 0  | 0  |
| P1413_001_Zm_A_1_M80_33  | 0    | 0   | 0.00  | 0.00000 | 0.00000 | 0.00000 | 0.00000 | 0.00000 | 0.00000 | 0.00 | 0.00    | 0.00   | 0.00   | 0.00    | 0.00   | 0.00   | 0.00    | 0.00   | 0.00   | 0.00    | 0.00   | 0.00   | failed                         | 0  | 0  |
| P1413_001_Zm_A_1_M80_50  | 104  | 43  | 2.39  | 0.06786 | 0.02448 | 0.01154 | 0.00085 | 0.04265 | 0.01559 | 0.03 | 66.67   | 23.41  | 23.15  | 73.96   | 5.44   | 5.44   | 0.00    | 0.00   | 431.33 | 0.00    | 0.00   | 0.00   | Pbc-corrected concordant scans | 17 | 31 |
| P1413_001_Zm_A_1_M80_60  | 0    | 0   | 0.00  | 0.00000 | 0.00000 | 0.00000 | 0.00000 | 0.00000 | 0.00000 | 0.00 | 0.00    | 0.00   | 0.00   | 0.00    | 0.00   | 0.00   | 0.00    | 0.00   | 0.00   | 0.00    | 0.00   | 0.00   | failed                         | 0  | 0  |
| P1413_001_Zm_A_1_M80_66  | 0    | 0   | 0.00  | 0.00000 | 0.00000 | 0.00000 | 0.00000 | 0.00000 | 0.00000 | 0.00 | 0.00    | 0.00   | 0.00   | 0.00    | 0.00   | 0.00   | 0.00    | 0.00   | 0.00   | 0.00    | 0.00   | 0.00   | failed                         | 0  | 0  |
| P1413_001_Zm_A_1_M80_80  | 0    | 0   | 0.00  | 0.00000 | 0.00000 | 0.00000 | 0.00000 | 0.00000 | 0.00000 | 0.00 | 0.00    | 0.00   | 0.00   | 0.00    | 0.00   | 0.00   | 0.00    | 0.00   | 0.00   | 0.00    | 0.00   | 0.00   | failed                         | 0  | 0  |
| P1413_001_Zm_A_1_M80_83  | 0    | 0   | 0.00  | 0.00000 | 0.00000 | 0.00000 | 0.00000 | 0.00000 | 0.00000 | 0.00 | 0.00    | 0.00   | 0.00   | 0.00    | 0.00   | 0.00   | 0.00    | 0.00   | 0.00   | 0.00    | 0.00   | 0.00   | failed                         | 0  | 0  |
| P1413_001_Zm_A_1_M80_114 | 256  | 111 | 2.31  | 0.07062 | 0.01138 | 0.01119 | 0.00055 | 0.04578 | 0.00761 | 0.03 | 69.29   | 10.82  | 10.77  | 71.72   | 3.48   | 3.48   | 0.00    | 0.00   | 351.05 | 0.00    | 0.00   | 0.00   | Pbc-corrected concordant scans | 13 | 31 |

|             |         |
|-------------|---------|
| Mineral     | Zircon  |
| Sample Name | 03D08   |
| AZZ Name    | 1413-03 |

| Analysis ID             | Uranium and Thorium |            |          |                      | Concordant Scans: Isotopic Ratios |             |         |                   |                      |         |                      | Concordant Scans: Ages |                       |         |                    |         |           |        | Preferred Age |        |       | Age Type | Concordant                  | Total Scans |    |
|-------------------------|---------------------|------------|----------|----------------------|-----------------------------------|-------------|---------|-------------------|----------------------|---------|----------------------|------------------------|-----------------------|---------|--------------------|---------|-----------|--------|---------------|--------|-------|----------|-----------------------------|-------------|----|
|                         | [U] (ppm)           | [Th] (ppm) | [U]/[Th] | 207Pb/235U ± 2 sigma | 206Pb/238U ± 2 sigma              | 207Pb/206Pb | 2 sigma | Error Correlation | 207Pb/235U ± 2 sigma | 2 sigma | 206Pb/238U ± 2 sigma | 2 sigma                | 207Pb/206Pb ± 2 sigma | 2 sigma | Preferred Age (Ma) | 2 sigma | 2 + sigma |        |               |        |       |          |                             |             |    |
| P1413_003_Zm_A_1_MBD_10 | 233                 | 55         | 4.24     | 0.06175              | 0.015057                          | 0.00846     | 0.00045 | 0.05292           | 0.01308              | 0.0     | 60.84                | 14.46                  | 14.36                 | 54.33   | 2.85               | 2.85    | 325.46    | 615.93 | 517.25        | 54.33  | 2.85  | 2.85     | 206Pb/238U concordant scans | 18          | 31 |
| P1413_003_Zm_A_1_MBD_69 | 2721                | 6362       | 0.43     | 0.00000              | 0.00000                           | 0.00000     | 0.00000 | 0.00000           | 0.00000              | 0.0     | 0.0                  | 0.0                    | 0.0                   | 0.0     | 0.0                | 0.0     | 0.0       | 0.0    | 0.0           | 60.31  | 5.34  | 7.39     | Pbc-corrected isotopic sums | 0           | 31 |
| P1413_003_Zm_A_1_MBD_1  | 331                 | 96         | 3.44     | 0.07320              | 0.012149                          | 0.01038     | 0.00066 | 0.05116           | 0.00880              | 0.1     | 61.73                | 11.85                  | 11.79                 | 66.55   | 4.18               | 4.18    | 247.91    | 422.38 | 373.77        | 66.55  | 4.18  | 4.18     | 206Pb/238U concordant scans | 19          | 31 |
| P1413_003_Zm_A_1_MBD_20 | 1109                | 747        | 1.48     | 0.06905              | 0.00691                           | 0.01048     | 0.00045 | 0.04780           | 0.00146              | 0.21    | 67.80                | 6.57                   | 6.55                  | 67.19   | 2.85               | 2.85    | 89.30     | 178.60 | 227.74        | 67.19  | 2.85  | 2.85     | 206Pb/238U concordant scans | 19          | 31 |
| P1413_003_Zm_A_1_MBD_11 | 2986                | 2690       | 1.11     | 0.07052              | 0.00534                           | 0.01063     | 0.00047 | 0.04813           | 0.00352              | 0.33    | 69.19                | 5.07                   | 5.06                  | 68.15   | 3.01               | 3.01    | 105.53    | 177.77 | 168.63        | 68.15  | 3.01  | 3.01     | 206Pb/238U concordant scans | 12          | 31 |
| P1413_003_Zm_A_1_MBD_25 | 2588                | 3131       | 0.83     | 0.00000              | 0.00000                           | 0.00000     | 0.00000 | 0.00000           | 0.00000              | 0.0     | 0.0                  | 0.0                    | 0.0                   | 0.0     | 0.0                | 0.0     | 0.0       | 0.0    | 0.0           | 69.77  | 4.98  | 6.02     | Pbc-corrected isotopic sums | 0           | 31 |
| P1413_003_Zm_A_1_MBD_14 | 288                 | 114        | 2.52     | 0.07779              | 0.01101                           | 0.01093     | 0.00053 | 0.05163           | 0.00751              | 0.07    | 76.06                | 10.40                  | 10.35                 | 70.07   | 3.41               | 3.40    | 268.89    | 352.17 | 317.68        | 70.07  | 3.41  | 3.40     | 206Pb/238U concordant scans | 21          | 31 |
| P1413_003_Zm_A_1_MBD_28 | 1988                | 1237       | 1.61     | 0.07299              | 0.00348                           | 0.01093     | 0.00032 | 0.04842           | 0.00218              | 0.37    | 71.54                | 3.30                   | 3.29                  | 70.10   | 2.07               | 2.07    | 119.69    | 107.83 | 104.39        | 70.10  | 2.07  | 2.07     | 206Pb/238U concordant scans | 26          | 31 |
| P1413_003_Zm_A_1_MBD_36 | 192                 | 81         | 2.38     | 0.07809              | 0.01779                           | 0.01094     | 0.00059 | 0.05176           | 0.01196              | 0.05    | 76.35                | 16.82                  | 16.68                 | 70.16   | 3.76               | 3.77    | 274.65    | 549.29 | 490.17        | 70.16  | 3.76  | 3.77     | 206Pb/238U concordant scans | 14          | 31 |
| P1413_003_Zm_A_1_MBD_76 | 2242                | 1929       | 1.16     | 0.07118              | 0.00403                           | 0.01104     | 0.00025 | 0.04675           | 0.00260              | 0.20    | 69.82                | 3.83                   | 3.82                  | 70.80   | 1.58               | 1.59    | 36.31     | 72.62  | 130.66        | 70.80  | 1.58  | 1.59     | 206Pb/238U concordant scans | 21          | 31 |
| P1413_003_Zm_A_1_MBD_62 | 157                 | 136        | 1.16     | 0.07351              | 0.01546                           | 0.01105     | 0.00052 | 0.04823           | 0.01019              | 0.09    | 72.03                | 14.68                  | 14.57                 | 70.87   | 3.32               | 3.31    | 110.58    | 221.16 | 464.02        | 70.87  | 3.32  | 3.31     | 206Pb/238U concordant scans | 15          | 31 |
| P1413_003_Zm_A_1_MBD_4  | 2983                | 2799       | 1.07     | 0.07544              | 0.00484                           | 0.01106     | 0.00049 | 0.04945           | 0.00263              | 0.57    | 73.85                | 4.57                   | 4.56                  | 70.93   | 3.15               | 3.15    | 169.27    | 126.46 | 121.75        | 70.93  | 3.15  | 3.15     | 206Pb/238U concordant scans | 24          | 31 |
| P1413_003_Zm_A_1_MBD_47 | 2434                | 2006       | 1.21     | 0.07296              | 0.00478                           | 0.01109     | 0.00033 | 0.04771           | 0.00310              | 0.21    | 71.51                | 4.53                   | 4.52                  | 71.11   | 2.11               | 2.11    | 84.81     | 157.64 | 150.43        | 71.11  | 2.11  | 2.11     | 206Pb/238U concordant scans | 15          | 31 |
| P1413_003_Zm_A_1_MBD_77 | 193                 | 62         | 3.12     | 0.07301              | 0.01590                           | 0.01126     | 0.00066 | 0.04704           | 0.01040              | 0.07    | 71.55                | 15.10                  | 14.99                 | 72.15   | 4.20               | 4.20    | 51.37     | 102.75 | 489.26        | 72.15  | 4.20  | 4.20     | 206Pb/238U concordant scans | 23          | 31 |
| P1413_003_Zm_A_1_MBD_75 | 58                  | 46         | 1.25     | 0.00000              | 0.00000                           | 0.00000     | 0.00000 | 0.00000           | 0.00000              | 0.0     | 0.0                  | 0.0                    | 0.0                   | 0.0     | 0.0                | 0.0     | 0.0       | 0.0    | 0.0           | 75.02  | 25.58 | 65.26    | Pbc-corrected isotopic sums | 0           | 31 |
| P1413_003_Zm_A_1_MBD_29 | 316                 | 103        | 3.07     | 0.08578              | 0.01149                           | 0.01192     | 0.00055 | 0.05218           | 0.00723              | 0.05    | 83.57                | 10.77                  | 10.72                 | 76.41   | 3.50               | 3.50    | 293.23    | 333.02 | 301.97        | 76.41  | 3.50  | 3.50     | 206Pb/238U concordant scans | 20          | 31 |
| P1413_003_Zm_A_1_MBD_51 | 2804                | 1888       | 1.48     | 0.07894              | 0.00587                           | 0.01196     | 0.00036 | 0.04786           | 0.00348              | 0.24    | 77.15                | 5.53                   | 5.52                  | 76.66   | 2.31               | 2.31    | 92.19     | 177.02 | 167.97        | 76.66  | 2.31  | 2.31     | 206Pb/238U concordant scans | 10          | 31 |
| P1413_003_Zm_A_1_MBD_38 | 171                 | 68         | 2.52     | 0.08046              | 0.01834                           | 0.01200     | 0.00074 | 0.04863           | 0.01139              | 0.03    | 78.57                | 17.31                  | 17.16                 | 76.89   | 4.74               | 4.74    | 129.97    | 259.94 | 508.87        | 76.89  | 4.74  | 4.74     | 206Pb/238U concordant scans | 16          | 31 |
| P1413_003_Zm_A_1_MBD_13 | 127                 | 96         | 1.32     | 0.08095              | 0.01776                           | 0.01204     | 0.00084 | 0.04877           | 0.01076              | 0.14    | 79.04                | 16.76                  | 16.62                 | 77.14   | 5.38               | 5.37    | 136.83    | 273.65 | 481.10        | 77.14  | 5.38  | 5.37     | 206Pb/238U concordant scans | 10          | 31 |
| P1413_003_Zm_A_1_MBD_20 | 283                 | 139        | 2.04     | 0.09835              | 0.02555                           | 0.01294     | 0.00089 | 0.05513           | 0.01463              | 0.04    | 95.25                | 23.76                  | 23.49                 | 82.87   | 5.64               | 5.64    | 417.49    | 654.86 | 543.85        | 82.87  | 5.64  | 5.64     | 206Pb/238U concordant scans | 13          | 31 |
| P1413_003_Zm_A_1_MBD_43 | 258                 | 73         | 3.56     | 0.09430              | 0.01225                           | 0.01454     | 0.00074 | 0.04703           | 0.00623              | 0.13    | 91.50                | 11.40                  | 11.33                 | 93.07   | 4.68               | 4.68    | 50.90     | 101.80 | 302.08        | 93.07  | 4.68  | 4.68     | 206Pb/238U concordant scans | 16          | 31 |
| P1413_003_Zm_A_1_MBD_35 | 756                 | 232        | 3.26     | 0.09985              | 0.00933                           | 0.01505     | 0.00044 | 0.04811           | 0.00447              | 0.15    | 96.64                | 8.63                   | 8.59                  | 96.32   | 2.81               | 2.81    | 104.53    | 209.06 | 212.41        | 96.32  | 2.81  | 2.81     | 206Pb/238U concordant scans | 25          | 31 |
| P1413_003_Zm_A_1_MBD_67 | 843                 | 276        | 3.05     | 0.10455              | 0.00806                           | 0.01555     | 0.00074 | 0.04875           | 0.00332              | 0.48    | 100.77               | 7.42                   | 7.40                  | 99.50   | 4.72               | 4.72    | 135.70    | 163.95 | 156.13        | 99.50  | 4.72  | 4.72     | 206Pb/238U concordant scans | 16          | 31 |
| P1413_003_Zm_A_1_MBD_50 | 242                 | 87         | 2.79     | 0.13394              | 0.02232                           | 0.01783     | 0.00068 | 0.05450           | 0.00195              | 0.07    | 127.63               | 20.88                  | 19.89                 | 113.90  | 4.30               | 4.29    | 391.59    | 400.42 | 356.10        | 113.90 | 4.30  | 4.29     | 206Pb/238U concordant scans | 23          | 31 |
| P1413_003_Zm_A_1_MBD_53 | 170                 | 70         | 2.43     | 0.17468              | 0.02179                           | 0.02476     | 0.00099 | 0.05116           | 0.00634              | 0.17    | 163.47               | 18.92                  | 18.74                 | 157.69  | 6.22               | 6.22    | 248.05    | 298.69 | 273.54        | 157.69 | 6.22  | 6.22     | 206Pb/238U concordant scans | 19          | 31 |
| P1413_003_Zm_A_1_MBD_22 | 216                 | 71         | 3.05     | 0.17480              | 0.02612                           | 0.02494     | 0.00098 | 0.05083           | 0.00750              | 0.17    | 163.58               | 22.70                  | 22.45                 | 158.81  | 6.19               | 6.19    | 233.15    | 359.60 | 323.80        | 158.81 | 6.19  | 6.19     | 206Pb/238U concordant scans | 24          | 31 |
| P1413_003_Zm_A_1_MBD_26 | 160                 | 57         | 2.82     | 0.18692              | 0.03664                           | 0.02515     | 0.00141 | 0.05390           | 0.01052              | 0.16    | 174.00               | 31.59                  | 31.11                 | 160.12  | 8.90               | 8.89    | 366.99    | 472.46 | 412.03        | 160.12 | 8.90  | 8.89     | 206Pb/238U concordant scans | 21          | 31 |
| P1413_003_Zm_A_1_MBD_78 | 128                 | 48         | 2.65     | 0.16152              | 0.02687                           | 0.02525     | 0.00102 | 0.04639           | 0.00777              | 0.08    | 152.03               | 23.63                  | 23.36                 | 160.75  | 6.43               | 6.43    | 18.08     | 36.17  | 379.48        | 160.75 | 6.43  | 6.43     | 206Pb/238U concordant scans | 22          | 31 |
| P1413_003_Zm_A_1_MBD_46 | 365                 | 129        | 2.84     | 0.17870              | 0.01057                           | 0.02532     | 0.00073 | 0.05119           | 0.00305              | 0.18    | 166.94               | 9.13                   | 9.09                  | 161.20  | 4.57               | 4.57    | 249.20    | 140.22 | 134.42        | 161.20 | 4.57  | 4.57     | 206Pb/238U concordant scans | 25          | 31 |
| P1413_003_Zm_A_1_MBD_44 | 90                  | 24         | 3.83     | 0.00000              | 0.00000                           | 0.00000     | 0.00000 | 0.00000           | 0.00000              | 0.0     | 0.0                  | 0.0                    | 0.0                   | 0.0     | 0.0                | 0.0     | 0.0       | 0.0    | 0.0           | 161.29 | 28.64 | 38.98    | Pbc-corrected isotopic sums | 0           | 31 |
| P1413_003_Zm_A_1_MBD_48 | 208                 | 67         | 3.13     | 0.19427              | 0.02736                           | 0.02596     | 0.00094 | 0.05428           | 0.00761              | 0.13    | 180.27               | 23.40                  | 23.13                 | 165.20  | 5.91               | 5.91    | 382.69    | 331.58 | 300.63        | 165.20 | 5.91  | 5.91     | 206Pb/238U concordant scans | 14          | 31 |
| P1413_003_Zm_A_1_MBD_55 | 148                 | 62         | 2.40     | 0.18221              | 0.02554                           | 0.02597     | 0.00153 | 0.05088           | 0.00746              | 0.09    | 169.96               | 22.60                  | 21.82                 | 165.30  | 9.63               | 9.63    | 235.30    | 356.90 | 321.60        | 165.30 | 9.63  | 9.63     | 206Pb/238U concordant scans | 15          | 31 |
| P1413_003_Zm_A_1_MBD_49 | 115                 | 51         | 2.26     | 0.18317              | 0.02919                           | 0.02608     | 0.00113 | 0.05342           | 0.00886              | 0.06    | 170.78               | 25.21                  | 24.90                 | 165.95  | 9.07               | 9.07    | 238.30    | 396.81 | 353.64        | 165.95 | 9.07  | 9.07     | 206Pb/238U concordant scans | 16          | 31 |
| P1413_003_Zm_A_1_MBD_7  | 142                 | 32         | 4.46     | 0.19272              | 0.03218                           | 0.02616     | 0.00144 | 0.05094           | 0.00825              | 0.14    | 178.94               | 27.58                  | 27.21                 | 166.49  | 9.03               | 9.03    | 346.87    | 403.35 | 358.53        | 166.49 | 9.03  | 9.03     | 206Pb/238U concordant scans | 18          | 31 |
| P1413_003_Zm_A_1_MBD_5  | 207                 | 62         | 3.32     | 0.18179              | 0.01760                           | 0.02633     | 0.00118 | 0.05007           | 0.00473              | 0.27    | 169.60               | 15.18                  | 15.06                 | 167.56  | 7.41               | 7.40    | 198.20    | 227.16 | 212.36        | 167.56 | 7.41  | 7.40     | 206Pb/238U concordant scans | 28          | 31 |
| P1413_003_Zm_A_1_MBD_74 | 190                 | 26         | 7.33     | 0.17965              | 0.02126                           | 0.02650     | 0.00143 | 0.04916           | 0.00623              | 0.13    | 167.76               | 18.38                  | 18.22                 | 168.62  | 9.01               | 9.00    | 155.63    | 300.08 | 274.85        | 168.62 | 9.01  | 9.00     | 206Pb/238U concordant scans | 14          | 31 |
| P1413_003_Zm_A_1_MBD_65 | 371                 | 45         | 8.18     | 0.18602              | 0.01356                           | 0.02656     | 0.00077 | 0.05080           | 0.00373              | 0.15    | 173.23               | 11.64                  | 11.58                 | 168.96  | 4.84               | 4.84    | 231.86    | 173.86 | 165.04        | 168.96 | 4.84  | 4.84     | 206Pb/238U concordant scans | 30          | 31 |
| P1413_003_Zm_A_1_MBD_15 | 318                 | 84         | 3.79     | 0.19390              | 0.01754                           | 0.02667     | 0.00114 | 0.05273           | 0.00460              | 0.30    | 179.95               | 14.98                  | 14.87                 | 169.68  | 7.15               | 7.15    | 317.12    | 204.86 | 192.66        | 169.68 | 7.15  | 7.15     | 206Pb/238U concordant scans | 24          | 31 |
| P1413_003_Zm_A_1_MBD_40 | 284                 | 41         | 6.97     | 0.19849              | 0.01519                           | 0.02678     | 0.00138 | 0.05376           | 0.00423              | 0.18    | 183.85               | 12.91                  | 12.83                 | 170.86  | 6.79               | 6.78    | 360.95    | 182.37 | 172.61        | 170.86 | 6.79  | 6.78     | 206Pb/238U concordant scans | 20          | 31 |
| P1413_003_Zm_A_1_MBD_23 | 170                 | 18         | 9.36     | 0.21306              | 0.03520                           | 0.02686     | 0.00136 | 0.05372           | 0.00946              | 0.16    | 196.11               | 29.68                  | 29.25                 | 170.88  | 8.56               | 8.55    | 511.64    | 383.49 | 342.37        | 170.88 | 8.56  | 8.55     | 206Pb/238U concordant scans | 17          | 31 |
| P1413_003_Zm_A_1_MBD_37 | 203                 | 103        | 1.98     | 0.18917              | 0.02600                           | 0.02691     | 0.00124 | 0.05098           | 0.00583              | 0.07    | 175.92               | 17.66                  | 17.51                 | 171.18  | 7.80               | 7.80    | 240.10    | 274.99 | 253.55        | 171.18 | 7.80  | 7.80     | 206Pb/238U concordant scans | 19          | 31 |
| P1413_003_Zm_A_1_MBD_56 | 176                 | 80         | 2.20     | 0.18497              | 0.02584                           | 0.02692     | 0.00131 | 0.04983           | 0.00714              | 0.08    | 172.33               | 22.27                  | 22.02                 | 171.27  | 8.21               | 8.20    | 186.91    | 351.96 | 319.67        | 171.27 | 8.21  | 8.20     | 206Pb/238U concordant scans | 12          | 31 |
| P1413_003_Zm_A_1_MBD_9  | 297                 | 41         | 7.17     | 0.18336              | 0.01580                           | 0.02697     | 0.00108 | 0.04931           | 0.00410              | 0.29    | 170.95               | 13.61                  | 13.51                 | 171.54  | 6.81               | 6.81    | 162.78    | 400.44 | 188.86        | 171.54 | 6.    |          |                             |             |    |

|                         |   |   |      |         |         |         |         |         |         |      |      |      |      |      |      |      |      |      |      |      |      |        |  |   |   |
|-------------------------|---|---|------|---------|---------|---------|---------|---------|---------|------|------|------|------|------|------|------|------|------|------|------|------|--------|--|---|---|
| P1413_003_Zm_A_1_MBD_52 | 0 | 0 | 0.00 | 0.00000 | 0.00000 | 0.00000 | 0.00000 | 0.00000 | 0.00000 | 0.00 | 0.00 | 0.00 | 0.00 | 0.00 | 0.00 | 0.00 | 0.00 | 0.00 | 0.00 | 0.00 | 0.00 | failed |  | 0 | 0 |
| P1413_003_Zm_A_1_MBD_54 | 0 | 0 | 0.00 | 0.00000 | 0.00000 | 0.00000 | 0.00000 | 0.00000 | 0.00000 | 0.00 | 0.00 | 0.00 | 0.00 | 0.00 | 0.00 | 0.00 | 0.00 | 0.00 | 0.00 | 0.00 | 0.00 | failed |  | 0 | 0 |
| P1413_003_Zm_A_1_MBD_63 | 0 | 0 | 0.00 | 0.00000 | 0.00000 | 0.00000 | 0.00000 | 0.00000 | 0.00000 | 0.00 | 0.00 | 0.00 | 0.00 | 0.00 | 0.00 | 0.00 | 0.00 | 0.00 | 0.00 | 0.00 | 0.00 | failed |  | 0 | 0 |
| P1413_003_Zm_A_1_MBD_71 | 0 | 0 | 0.00 | 0.00000 | 0.00000 | 0.00000 | 0.00000 | 0.00000 | 0.00000 | 0.00 | 0.00 | 0.00 | 0.00 | 0.00 | 0.00 | 0.00 | 0.00 | 0.00 | 0.00 | 0.00 | 0.00 | failed |  | 0 | 0 |
| P1413_003_Zm_A_1_MBD_81 | 0 | 0 | 0.00 | 0.00000 | 0.00000 | 0.00000 | 0.00000 | 0.00000 | 0.00000 | 0.00 | 0.00 | 0.00 | 0.00 | 0.00 | 0.00 | 0.00 | 0.00 | 0.00 | 0.00 | 0.00 | 0.00 | failed |  | 0 | 0 |

## Data Repository Item E - U-Pb zircon analytical results from Cantwell Formation bentonites

| Mineral                   |           | Zircon              |       | Sample Name                       |         | 04DO8      |         | AZZ Name    |         | 1413-08                |            |         |         |            |         |               |             |         |         |                    |         |          |                             |            |             |             |  |
|---------------------------|-----------|---------------------|-------|-----------------------------------|---------|------------|---------|-------------|---------|------------------------|------------|---------|---------|------------|---------|---------------|-------------|---------|---------|--------------------|---------|----------|-----------------------------|------------|-------------|-------------|--|
|                           |           | Uranium and Thorium |       | Concordant Scans: Isotopic Ratios |         |            |         |             |         | Concordant Scans: Ages |            |         |         |            |         | Preferred Age |             | 2-sigma |         | 2-sigma            |         | Age Type |                             | Concordant |             | Total Scans |  |
| Analysis Name             | [U] (ppm) | [Th] (ppm)          | U/Th  | 207Pb/235U                        | 2-sigma | 206Pb/238U | 2-sigma | 207Pb/206Pb | 2-sigma | Error Correlation      | 207Pb/235U | 2-sigma | 2-sigma | 206Pb/238U | 2-sigma | 2-sigma       | 207Pb/206Pb | 2-sigma | 2-sigma | Preferred Age (Ma) | 2-sigma | 2-sigma  | Age Type                    | Concordant | Total Scans |             |  |
| P1413_008_Zrn_A_1_MBD_34  | 486       | 153                 | 3.17  | 0.06967                           | 0.01205 | 0.01029    | 0.00072 | 0.04911     | 0.00868 | 0.14                   | 68.39      | 11.47   | 11.41   | 65.99      | 4.60    | 4.60          | 153.05      | 306.11  | 389.89  | 65.99              | 4.60    | 4.60     | 206Pb/238U concordant scans | 12         | 31          |             |  |
| P1413_008_Zrn_A_1_MBD_88  | 335       | 110                 | 3.04  | 0.07042                           | 0.01884 | 0.01040    | 0.00069 | 0.04913     | 0.01339 | 0.03                   | 69.10      | 17.95   | 17.80   | 66.66      | 4.38    | 4.38          | 154.19      | 308.38  | 582.83  | 66.66              | 4.38    | 4.38     | 206Pb/238U concordant scans | 7          | 31          |             |  |
| P1413_008_Zrn_A_1_MBD_38  | 764       | 276                 | 2.77  | 0.07363                           | 0.00890 | 0.01076    | 0.00044 | 0.04965     | 0.00595 | 0.18                   | 72.14      | 8.44    | 8.40    | 68.97      | 2.80    | 2.80          | 178.50      | 291.99  | 268.01  | 68.97              | 2.80    | 2.80     | 206Pb/238U concordant scans | 20         | 31          |             |  |
| P1413_008_Zrn_A_1_MBD_3   | 605       | 347                 | 1.75  | 0.07613                           | 0.00966 | 0.01077    | 0.00041 | 0.05126     | 0.00654 | 0.11                   | 74.50      | 9.14    | 9.09    | 69.07      | 2.61    | 2.61          | 252.49      | 307.69  | 281.06  | 69.07              | 2.61    | 2.61     | 206Pb/238U concordant scans | 16         | 31          |             |  |
| P1413_008_Zrn_A_1_MBD_116 | 540       | 139                 | 3.90  | 0.07340                           | 0.00755 | 0.01081    | 0.00038 | 0.04925     | 0.00505 | 0.15                   | 71.93      | 7.16    | 7.13    | 69.30      | 2.41    | 2.41          | 159.98      | 249.10  | 231.46  | 69.30              | 2.41    | 2.41     | 206Pb/238U concordant scans | 20         | 31          |             |  |
| P1413_008_Zrn_A_1_MBD_53  | 484       | 159                 | 3.05  | 0.07571                           | 0.01281 | 0.01093    | 0.00046 | 0.05025     | 0.00864 | 0.03                   | 74.11      | 12.13   | 12.05   | 70.06      | 2.93    | 2.93          | 206.69      | 413.38  | 376.32  | 70.06              | 2.93    | 2.93     | 206Pb/238U concordant scans | 19         | 31          |             |  |
| P1413_008_Zrn_A_1_MBD_32  | 1322      | 410                 | 3.23  | 0.07318                           | 0.00586 | 0.01109    | 0.00055 | 0.04787     | 0.00387 | 0.26                   | 71.71      | 5.55    | 5.54    | 71.07      | 3.48    | 3.48          | 93.06       | 186.13  | 185.94  | 71.07              | 3.48    | 3.48     | 206Pb/238U concordant scans | 13         | 31          |             |  |
| P1413_008_Zrn_A_1_MBD_71  | 283       | 128                 | 2.21  | 0.07519                           | 0.01617 | 0.01113    | 0.00051 | 0.04899     | 0.01054 | 0.09                   | 73.61      | 15.33   | 15.22   | 71.36      | 3.22    | 3.22          | 147.42      | 294.84  | 469.00  | 71.36              | 3.22    | 3.22     | 206Pb/238U concordant scans | 28         | 31          |             |  |
| P1413_008_Zrn_A_1_MBD_7   | 1152      | 633                 | 1.82  | 0.08005                           | 0.00736 | 0.01116    | 0.00031 | 0.05205     | 0.00480 | 0.10                   | 78.19      | 6.93    | 6.91    | 71.51      | 2.01    | 2.00          | 287.53      | 218.02  | 204.28  | 71.51              | 2.01    | 2.00     | 206Pb/238U concordant scans | 15         | 31          |             |  |
| P1413_008_Zrn_A_1_MBD_97  | 362       | 131                 | 2.75  | 0.07833                           | 0.01442 | 0.01121    | 0.00062 | 0.05067     | 0.00953 | 0.06                   | 76.57      | 13.62   | 13.53   | 71.87      | 3.96    | 3.96          | 225.93      | 451.87  | 407.89  | 71.87              | 3.96    | 3.96     | 206Pb/238U concordant scans | 13         | 31          |             |  |
| P1413_008_Zrn_A_1_MBD_110 | 376       | 82                  | 4.60  | 0.07547                           | 0.01484 | 0.01127    | 0.00050 | 0.04858     | 0.00961 | 0.07                   | 73.88      | 14.06   | 13.96   | 72.23      | 3.21    | 3.21          | 127.61      | 255.23  | 435.29  | 72.23              | 3.21    | 3.21     | 206Pb/238U concordant scans | 23         | 31          |             |  |
| P1413_008_Zrn_A_1_MBD_83  | 161       | 63                  | 2.54  | 0.07766                           | 0.01601 | 0.01138    | 0.00082 | 0.04950     | 0.01064 | 0.04                   | 75.94      | 15.15   | 15.03   | 72.93      | 5.26    | 5.26          | 171.60      | 343.20  | 466.49  | 72.93              | 5.26    | 5.26     | 206Pb/238U concordant scans | 16         | 31          |             |  |
| P1413_008_Zrn_A_1_MBD_26  | 560       | 209                 | 2.68  | 0.08581                           | 0.01252 | 0.01152    | 0.00067 | 0.05402     | 0.00801 | 0.14                   | 83.59      | 11.74   | 11.67   | 73.84      | 4.30    | 4.30          | 372.05      | 352.41  | 317.66  | 73.84              | 4.30    | 4.30     | 206Pb/238U concordant scans | 26         | 31          |             |  |
| P1413_008_Zrn_A_1_MBD_40  | 455       | 18                  | 25.56 | 0.08112                           | 0.01567 | 0.01167    | 0.00062 | 0.05043     | 0.00982 | 0.09                   | 79.20      | 14.77   | 14.66   | 74.78      | 3.92    | 3.92          | 214.81      | 429.62  | 422.25  | 74.78              | 3.92    | 3.92     | 206Pb/238U concordant scans | 10         | 31          |             |  |
| P1413_008_Zrn_A_1_MBD_6   | 420       | 105                 | 4.01  | 0.08058                           | 0.01477 | 0.01170    | 0.00049 | 0.04995     | 0.00929 | 0.03                   | 78.69      | 13.93   | 13.83   | 74.99      | 3.09    | 3.09          | 192.49      | 384.98  | 406.00  | 74.99              | 3.09    | 3.09     | 206Pb/238U concordant scans | 18         | 31          |             |  |
| P1413_008_Zrn_A_1_MBD_72  | 445       | 80                  | 5.54  | 0.08858                           | 0.01458 | 0.01179    | 0.00068 | 0.05448     | 0.00879 | 0.22                   | 86.18      | 13.65   | 13.56   | 75.58      | 4.36    | 4.36          | 390.79      | 384.15  | 343.18  | 75.58              | 4.36    | 4.36     | 206Pb/238U concordant scans | 20         | 31          |             |  |
| P1413_008_Zrn_A_1_MBD_14  | 615       | 343                 | 1.79  | 0.08439                           | 0.00953 | 0.01182    | 0.00045 | 0.05177     | 0.00581 | 0.17                   | 82.27      | 8.95    | 8.91    | 75.77      | 2.85    | 2.85          | 275.33      | 267.66  | 247.25  | 75.77              | 2.85    | 2.85     | 206Pb/238U concordant scans | 24         | 31          |             |  |
| P1413_008_Zrn_A_1_MBD_22  | 301       | 108                 | 2.79  | 0.08805                           | 0.02472 | 0.01186    | 0.00094 | 0.05383     | 0.01547 | 0.05                   | 85.68      | 23.20   | 22.94   | 76.02      | 6.02    | 6.01          | 364.04      | 722.70  | 590.17  | 76.02              | 6.02    | 6.01     | 206Pb/238U concordant scans | 8          | 31          |             |  |
| P1413_008_Zrn_A_1_MBD_82  | 384       | 94                  | 4.07  | 0.09141                           | 0.01232 | 0.01234    | 0.00051 | 0.05371     | 0.00739 | 0.05                   | 88.81      | 11.50   | 11.43   | 79.08      | 3.24    | 3.24          | 359.00      | 326.64  | 296.60  | 79.08              | 3.24    | 3.24     | 206Pb/238U concordant scans | 22         | 31          |             |  |
| P1413_008_Zrn_A_1_MBD_115 | 266       | 74                  | 3.57  | 0.08861                           | 0.01791 | 0.01255    | 0.00063 | 0.05121     | 0.01045 | 0.07                   | 86.20      | 16.77   | 16.64   | 80.39      | 4.00    | 4.00          | 250.38      | 500.76  | 438.32  | 80.39              | 4.00    | 4.00     | 206Pb/238U concordant scans | 19         | 31          |             |  |
| P1413_008_Zrn_A_1_MBD_104 | 249       | 128                 | 1.95  | 0.08741                           | 0.01616 | 0.01272    | 0.00060 | 0.04985     | 0.00929 | 0.08                   | 85.08      | 15.15   | 15.03   | 81.46      | 3.84    | 3.84          | 187.96      | 375.92  | 407.11  | 81.46              | 3.84    | 3.84     | 206Pb/238U concordant scans | 17         | 31          |             |  |
| P1413_008_Zrn_A_1_MBD_98  | 5306      | 9560                | 0.56  | 0.08507                           | 0.01679 | 0.01233    | 0.00237 | 0.05005     | 0.00265 | 0.96                   | 82.90      | 15.78   | 15.65   | 78.99      | 15.08   | 15.06         | 197.17      | 125.42  | 120.78  | 82.90              | 15.78   | 15.65    | 207Pb/235U concordant scans | 21         | 31          |             |  |
| P1413_008_Zrn_A_1_MBD_19  | 712       | 221                 | 3.23  | 0.09672                           | 0.01173 | 0.01396    | 0.00065 | 0.05025     | 0.00630 | 0.08                   | 93.74      | 10.89   | 10.83   | 89.37      | 4.13    | 4.13          | 206.55      | 304.50  | 278.48  | 89.37              | 4.13    | 4.13     | 206Pb/238U concordant scans | 22         | 31          |             |  |
| P1413_008_Zrn_A_1_MBD_50  | 371       | 146                 | 2.54  | 0.10218                           | 0.01628 | 0.01463    | 0.00051 | 0.05067     | 0.00814 | 0.05                   | 98.79      | 15.06   | 14.95   | 93.61      | 3.26    | 3.26          | 225.66      | 394.10  | 351.51  | 93.61              | 3.26    | 3.26     | 206Pb/238U concordant scans | 19         | 31          |             |  |
| P1413_008_Zrn_A_1_MBD_63  | 383       | 137                 | 2.80  | 0.10277                           | 0.01777 | 0.01487    | 0.00075 | 0.05013     | 0.00873 | 0.11                   | 99.33      | 16.43   | 16.30   | 95.15      | 4.74    | 4.74          | 200.93      | 401.85  | 380.90  | 95.15              | 4.74    | 4.74     | 206Pb/238U concordant scans | 21         | 31          |             |  |
| P1413_008_Zrn_A_1_MBD_107 | 549       | 265                 | 2.07  | 0.10438                           | 0.01313 | 0.01502    | 0.00057 | 0.05038     | 0.00630 | 0.15                   | 100.81     | 12.10   | 12.03   | 96.13      | 3.60    | 3.60          | 212.79      | 303.14  | 277.33  | 96.13              | 3.60    | 3.60     | 206Pb/238U concordant scans | 22         | 31          |             |  |
| P1413_008_Zrn_A_1_MBD_119 | 202       | 75                  | 2.72  | 0.10419                           | 0.01751 | 0.01506    | 0.00077 | 0.05017     | 0.00859 | 0.07                   | 100.63     | 16.17   | 16.04   | 96.38      | 4.89    | 4.89          | 202.66      | 405.32  | 374.91  | 96.38              | 4.89    | 4.89     | 206Pb/238U concordant scans | 26         | 31          |             |  |
| P1413_008_Zrn_A_1_MBD_96  | 187       | 95                  | 1.97  | 0.10171                           | 0.02086 | 0.01521    | 0.00080 | 0.04849     | 0.01013 | 0.04                   | 98.35      | 19.31   | 19.13   | 97.33      | 5.10    | 5.09          | 123.26      | 246.51  | 458.13  | 97.33              | 5.10    | 5.09     | 206Pb/238U concordant scans | 15         | 31          |             |  |
| P1413_008_Zrn_A_1_MBD_78  | 120       | 54                  | 2.23  | 0.12514                           | 0.02704 | 0.01522    | 0.00076 | 0.05963     | 0.01289 | 0.10                   | 119.72     | 24.55   | 24.25   | 97.38      | 4.85    | 4.85          | 590.03      | 506.96  | 437.16  | 97.38              | 4.85    | 4.85     | 206Pb/238U concordant scans | 16         | 31          |             |  |
| P1413_008_Zrn_A_1_MBD_60  | 300       | 77                  | 3.90  | 0.12262                           | 0.01892 | 0.01722    | 0.00089 | 0.05164     | 0.00798 | 0.15                   | 117.44     | 17.19   | 17.04   | 110.06     | 5.66    | 5.66          | 269.64      | 375.08  | 336.21  | 110.06             | 5.66    | 5.66     | 206Pb/238U concordant scans | 20         | 31          |             |  |
| P1413_008_Zrn_A_1_MBD_28  | 149       | 87                  | 1.72  | 0.13346                           | 0.02751 | 0.01835    | 0.00098 | 0.05274     | 0.01088 | 0.12                   | 127.20     | 24.80   | 24.50   | 117.24     | 6.21    | 6.21          | 317.59      | 506.71  | 438.03  | 117.24             | 6.21    | 6.21     | 206Pb/238U concordant scans | 15         | 31          |             |  |
| P1413_008_Zrn_A_1_MBD_44  | 96        | 37                  | 2.59  | 0.13097                           | 0.03609 | 0.01854    | 0.01114 | 0.05122     | 0.01425 | 0.06                   | 124.96     | 32.67   | 32.15   | 118.45     | 7.21    | 7.21          | 250.71      | 501.42  | 583.86  | 118.45             | 7.21    | 7.21     | 206Pb/238U concordant scans | 10         | 31          |             |  |
| P1413_008_Zrn_A_1_MBD_27  | 689       | 241                 | 2.86  | 0.13885                           | 0.01119 | 0.01947    | 0.00079 | 0.05172     | 0.00436 | 0.11                   | 132.02     | 10.00   | 9.95    | 124.30     | 5.00    | 5.00          | 273.27      | 199.35  | 187.81  | 124.30             | 5.00    | 5.00     | 206Pb/238U concordant scans | 27         | 31          |             |  |
| P1413_008_Zrn_A_1_MBD_16  | 369       | 176                 | 2.10  | 0.16099                           | 0.02178 | 0.02306    | 0.01010 | 0.05063     | 0.00684 | 0.16                   | 151.57     | 19.14   | 18.96   | 146.98     | 6.92    | 6.92          | 232.96      | 328.42  | 298.32  | 146.98             | 6.92    | 6.92     | 206Pb/238U concordant scans | 12         | 31          |             |  |
| P1413_008_Zrn_A_1_MBD_24  | 171       | 42                  | 4.07  | 0.16869                           | 0.04434 | 0.02538    | 0.01119 | 0.04821     | 0.01272 | 0.06                   | 1581       |         |         |            |         |               |             |         |         |                    |         |          |                             |            |             |             |  |

|                          |     |     |      |          |         |         |         |         |         |      |         |        |        |         |        |        |         |        |        |         |        |        |                             |    |    |
|--------------------------|-----|-----|------|----------|---------|---------|---------|---------|---------|------|---------|--------|--------|---------|--------|--------|---------|--------|--------|---------|--------|--------|-----------------------------|----|----|
| P1413_008_Zm_A_1_MBD_81  | 207 | 209 | 0.99 | 0.69028  | 0.05613 | 0.08498 | 0.00369 | 0.05891 | 0.00476 | 0.16 | 532.97  | 34.00  | 33.44  | 525.76  | 16.00  | 15.98  | 563.93  | 180.92 | 171.19 | 525.76  | 16.00  | 15.98  | 206Pb/238U concordant scans | 22 | 31 |
| P1413_008_Zm_A_1_MBD_118 | 183 | 227 | 0.81 | 0.79354  | 0.05098 | 0.09478 | 0.00311 | 0.06072 | 0.00388 | 0.21 | 593.18  | 29.07  | 28.66  | 583.76  | 18.34  | 18.31  | 629.34  | 140.65 | 134.68 | 583.76  | 18.34  | 18.31  | 206Pb/238U concordant scans | 20 | 31 |
| P1413_008_Zm_A_1_MBD_20  | 732 | 140 | 5.21 | 0.00000  | 0.00000 | 0.00000 | 0.00000 | 0.00000 | 0.00000 | 0.00 | 0.00    | 0.00   | 0.00   | 0.00    | 0.00   | 0.00   | 0.00    | 0.00   | 0.00   | 609.81  | 61.51  | 46.98  | Pbc-corrected isotopic sums | 0  | 30 |
| P1413_008_Zm_A_1_MBD_108 | 170 | 38  | 4.45 | 0.79994  | 0.07791 | 0.10244 | 0.00487 | 0.05663 | 0.00522 | 0.34 | 596.79  | 44.43  | 43.48  | 628.70  | 28.51  | 28.45  | 477.30  | 210.34 | 197.37 | 628.70  | 28.51  | 28.45  | 206Pb/238U concordant scans | 24 | 31 |
| P1413_008_Zm_A_1_MBD_39  | 775 | 652 | 1.19 | 0.00000  | 0.00000 | 0.00000 | 0.00000 | 0.00000 | 0.00000 | 0.00 | 0.00    | 0.00   | 0.00   | 0.00    | 0.00   | 0.00   | 0.00    | 0.00   | 0.00   | 908.10  | 109.13 | 66.89  | Pbc-corrected isotopic sums | 0  | 31 |
| P1413_008_Zm_A_1_MBD_51  | 598 | 933 | 0.64 | 0.00000  | 0.00000 | 0.00000 | 0.00000 | 0.00000 | 0.00000 | 0.00 | 0.00    | 0.00   | 0.00   | 0.00    | 0.00   | 0.00   | 0.00    | 0.00   | 0.00   | 975.45  | 74.34  | 75.74  | Pbc-corrected isotopic sums | 0  | 31 |
| P1413_008_Zm_A_1_MBD_86  | 337 | 201 | 1.67 | 0.67450  | 0.07106 | 0.16604 | 0.00517 | 0.07314 | 0.00287 | 0.40 | 998.89  | 27.16  | 26.80  | 990.25  | 28.59  | 28.53  | 1017.91 | 80.49  | 78.45  | 998.89  | 27.16  | 26.80  | 207Pb/235U concordant scans | 30 | 31 |
| P1413_008_Zm_A_1_MBD_90  | 684 | 75  | 9.14 | 0.74823  | 0.06868 | 0.17193 | 0.00473 | 0.07375 | 0.00270 | 0.37 | 1026.51 | 25.53  | 25.22  | 1022.72 | 26.05  | 26.00  | 1034.59 | 74.75  | 72.99  | 1026.51 | 25.53  | 25.22  | 207Pb/235U concordant scans | 29 | 31 |
| P1413_008_Zm_A_1_MBD_114 | 44  | 29  | 1.48 | 0.61000  | 0.13727 | 0.17565 | 0.00722 | 0.06776 | 0.00545 | 0.30 | 986.10  | 53.48  | 52.10  | 1043.16 | 39.64  | 39.35  | 861.18  | 171.53 | 162.61 | 1043.16 | 39.64  | 39.52  | 206Pb/238U concordant scans | 29 | 31 |
| P1413_008_Zm_A_1_MBD_65  | 469 | 136 | 3.45 | 0.97608  | 0.08255 | 0.18775 | 0.00618 | 0.07634 | 0.00288 | 0.45 | 1107.39 | 28.36  | 27.97  | 1109.17 | 33.56  | 33.47  | 1103.88 | 76.49  | 74.64  | 1107.39 | 28.36  | 27.97  | 207Pb/235U concordant scans | 29 | 31 |
| P1413_008_Zm_A_1_MBD_103 | 70  | 19  | 3.61 | 0.21048  | 0.12144 | 0.19351 | 0.00675 | 0.07889 | 0.00448 | 0.27 | 1150.43 | 40.11  | 39.33  | 1140.36 | 36.52  | 36.41  | 1169.45 | 114.58 | 110.46 | 1140.36 | 36.52  | 36.41  | 206Pb/238U concordant scans | 22 | 31 |
| P1413_008_Zm_A_1_MBD_85  | 370 | 237 | 1.56 | 0.72404  | 0.12360 | 0.22214 | 0.00783 | 0.08894 | 0.00330 | 0.58 | 1335.04 | 33.98  | 33.42  | 1293.18 | 41.38  | 41.24  | 1402.81 | 71.86  | 70.20  | 1335.04 | 33.98  | 33.42  | 207Pb/235U concordant scans | 29 | 31 |
| P1413_008_Zm_A_1_MBD_0   | 152 | 42  | 3.63 | 0.79829  | 0.15508 | 0.22580 | 0.00820 | 0.08988 | 0.00456 | 0.42 | 1355.08 | 41.89  | 41.04  | 1342.17 | 43.19  | 43.05  | 1422.96 | 98.46  | 95.37  | 1355.08 | 41.89  | 41.04  | 207Pb/235U concordant scans | 23 | 31 |
| P1413_008_Zm_A_1_MBD_30  | 169 | 36  | 4.74 | 0.26292  | 0.50091 | 0.22422 | 0.02697 | 0.09584 | 0.01571 | 0.36 | 1398.16 | 132.58 | 124.45 | 1304.15 | 142.83 | 141.26 | 1544.61 | 325.02 | 293.34 | 1398.16 | 132.58 | 124.45 | 207Pb/235U concordant scans | 2  | 31 |
| P1413_008_Zm_A_1_MBD_18  | 179 | 108 | 1.66 | 0.42966  | 0.17934 | 0.26165 | 0.00982 | 0.09433 | 0.00449 | 0.46 | 1505.08 | 41.79  | 40.94  | 1498.29 | 50.27  | 50.08  | 1514.66 | 91.16  | 88.38  | 1505.08 | 41.79  | 40.94  | 207Pb/235U concordant scans | 31 | 31 |
| P1413_008_Zm_A_1_MBD_87  | 337 | 151 | 2.23 | 0.81421  | 0.16947 | 0.28296 | 0.00861 | 0.09776 | 0.00381 | 0.48 | 1595.75 | 36.06  | 35.43  | 1606.24 | 43.34  | 43.20  | 1581.92 | 73.78  | 72.01  | 1595.75 | 36.06  | 35.43  | 207Pb/235U concordant scans | 30 | 31 |
| P1413_008_Zm_A_1_MBD_42  | 133 | 146 | 0.92 | 0.14858  | 0.22838 | 0.29481 | 0.01169 | 0.10206 | 0.00527 | 0.40 | 1663.93 | 45.55  | 44.55  | 1665.55 | 58.35  | 58.09  | 1661.89 | 97.16  | 94.10  | 1663.93 | 45.55  | 44.55  | 207Pb/235U concordant scans | 29 | 31 |
| P1413_008_Zm_A_1_MBD_68  | 374 | 303 | 1.23 | 0.16481  | 0.39138 | 0.27451 | 0.02500 | 0.11004 | 0.00943 | 0.56 | 1667.13 | 78.44  | 75.52  | 1563.65 | 127.05 | 125.81 | 1800.01 | 160.06 | 151.88 | 1667.13 | 78.44  | 75.52  | 207Pb/235U concordant scans | 3  | 31 |
| P1413_008_Zm_A_1_MBD_67  | 246 | 75  | 3.26 | 0.46942  | 0.19810 | 0.31619 | 0.01001 | 0.10768 | 0.00420 | 0.40 | 1766.28 | 35.63  | 35.02  | 1771.10 | 49.01  | 48.76  | 1760.52 | 72.25  | 70.54  | 1766.28 | 35.63  | 35.02  | 207Pb/235U concordant scans | 27 | 31 |
| P1413_008_Zm_A_1_MBD_66  | 168 | 71  | 2.37 | 0.48167  | 0.20645 | 0.32402 | 0.01036 | 0.10782 | 0.00418 | 0.44 | 1787.85 | 36.36  | 35.72  | 1809.32 | 50.53  | 50.33  | 1762.89 | 71.80  | 70.11  | 1787.85 | 36.36  | 35.72  | 207Pb/235U concordant scans | 29 | 31 |
| P1413_008_Zm_A_1_MBD_91  | 67  | 75  | 0.90 | 0.58270  | 0.28193 | 0.33918 | 0.01291 | 0.11082 | 0.00507 | 0.54 | 1849.78 | 46.84  | 45.78  | 1882.73 | 62.30  | 62.00  | 1812.92 | 84.22  | 81.90  | 1849.78 | 46.84  | 45.78  | 207Pb/235U concordant scans | 25 | 31 |
| P1413_008_Zm_A_1_MBD_61  | 427 | 138 | 3.10 | 0.29130  | 0.19712 | 0.33174 | 0.00956 | 0.11568 | 0.00415 | 0.32 | 1867.46 | 32.07  | 31.57  | 1846.83 | 46.38  | 46.21  | 1890.50 | 65.29  | 63.88  | 1867.46 | 32.07  | 31.57  | 207Pb/235U concordant scans | 28 | 31 |
| P1413_008_Zm_A_1_MBD_49  | 79  | 50  | 1.59 | 0.53610  | 0.31457 | 0.33414 | 0.01201 | 0.11626 | 0.00596 | 0.49 | 1877.87 | 50.89  | 49.64  | 1858.41 | 58.16  | 57.89  | 1899.45 | 93.57  | 90.70  | 1877.87 | 50.89  | 49.64  | 207Pb/235U concordant scans | 28 | 31 |
| P1413_008_Zm_A_1_MBD_64  | 208 | 72  | 2.90 | 0.00000  | 0.00000 | 0.00000 | 0.00000 | 0.00000 | 0.00000 | 0.00 | 0.00    | 0.00   | 0.00   | 0.00    | 0.00   | 0.00   | 0.00    | 0.00   | 0.00   | 1887.10 | 147.38 | 134.60 | Pbc-corrected isotopic sums | 0  | 31 |
| P1413_008_Zm_A_1_MBD_92  | 87  | 79  | 1.10 | 0.54520  | 0.30279 | 0.34109 | 0.01461 | 0.11593 | 0.00522 | 0.59 | 1893.10 | 48.22  | 47.10  | 1891.92 | 70.43  | 70.04  | 1894.40 | 82.12  | 79.91  | 1893.10 | 48.22  | 47.10  | 207Pb/235U concordant scans | 25 | 31 |
| P1413_008_Zm_A_1_MBD_10  | 70  | 12  | 5.94 | 0.00000  | 0.00000 | 0.00000 | 0.00000 | 0.00000 | 0.00000 | 0.00 | 0.00    | 0.00   | 0.00   | 0.00    | 0.00   | 0.00   | 0.00    | 0.00   | 0.00   | 1951.95 | 212.77 | 157.26 | Pbc-corrected isotopic sums | 0  | 31 |
| P1413_008_Zm_A_1_MBD_9   | 355 | 86  | 4.12 | 0.90264  | 0.24212 | 0.35574 | 0.01037 | 0.12034 | 0.00459 | 0.39 | 1961.62 | 35.93  | 35.31  | 1961.94 | 49.42  | 49.23  | 1961.28 | 68.88  | 67.31  | 1961.62 | 35.93  | 35.31  | 207Pb/235U concordant scans | 27 | 31 |
| P1413_008_Zm_A_1_MBD_25  | 455 | 159 | 2.86 | 0.18472  | 0.32863 | 0.35929 | 0.01660 | 0.12485 | 0.00519 | 0.64 | 2002.29 | 46.98  | 45.92  | 1978.81 | 78.94  | 78.46  | 2026.61 | 74.61  | 72.77  | 2002.29 | 46.98  | 45.92  | 207Pb/235U concordant scans | 28 | 31 |
| P1413_008_Zm_A_1_MBD_59  | 94  | 27  | 3.55 | 0.43907  | 0.31449 | 0.36707 | 0.01205 | 0.12722 | 0.00603 | 0.30 | 2037.62 | 42.97  | 42.08  | 2015.62 | 56.93  | 56.68  | 2059.96 | 84.86  | 82.48  | 2037.62 | 42.97  | 42.08  | 207Pb/235U concordant scans | 14 | 31 |
| P1413_008_Zm_A_1_MBD_112 | 58  | 89  | 0.65 | 12.06458 | 0.64295 | 0.46811 | 0.02300 | 0.18692 | 0.00847 | 0.58 | 2609.44 | 50.59  | 49.37  | 2475.26 | 101.38 | 100.59 | 2715.29 | 75.66  | 73.71  | 2609.44 | 50.59  | 49.37  | 207Pb/235U concordant scans | 16 | 31 |
| P1413_008_Zm_A_1_MBD_17  | 179 | 218 | 0.82 | 13.93197 | 0.60600 | 0.54210 | 0.01827 | 0.18639 | 0.00776 | 0.37 | 2745.09 | 41.26  | 40.40  | 2792.75 | 76.59  | 76.14  | 2710.59 | 69.46  | 67.82  | 2745.09 | 41.26  | 40.44  | 207Pb/235U concordant scans | 26 | 31 |
| P1413_008_Zm_A_1_MBD_102 | 237 | 236 | 1.01 | 14.57658 | 1.19476 | 0.50649 | 0.03773 | 0.20873 | 0.01353 | 0.64 | 2788.01 | 79.41  | 76.43  | 2641.61 | 162.48 | 160.46 | 2895.72 | 107.12 | 103.23 | 2788.01 | 79.41  | 76.43  | 207Pb/235U concordant scans | 3  | 31 |
| P1413_008_Zm_A_1_MBD_5   | 39  | 27  | 1.42 | 15.29911 | 1.28951 | 0.56615 | 0.04237 | 0.19509 | 0.01159 | 0.73 | 2829.68 | 82.94  | 79.68  | 2891.98 | 175.59 | 173.24 | 2785.59 | 99.00  | 95.67  | 2829.68 | 82.94  | 79.68  | 207Pb/235U concordant scans | 14 | 31 |
| P1413_008_Zm_A_1_MBD_109 | 74  | 32  | 2.29 | 15.72793 | 0.74592 | 0.54327 | 0.02185 | 0.21066 | 0.00849 | 0.55 | 2863.57 | 45.65  | 44.64  | 2797.12 | 91.59  | 90.94  | 2910.65 | 66.08  | 64.58  | 2863.57 | 45.65  | 44.64  | 207Pb/235U concordant scans | 29 | 31 |
| P1413_008_Zm_A_1_MBD_21  | 0   | 0   | 0.00 | 0.00000  | 0.00000 | 0.00000 | 0.00000 | 0.00000 | 0.00000 | 0.00 | 0.00    | 0.00   | 0.00   | 0.00    | 0.00   | 0.00   | 0.00    | 0.00   | 0.00   | 0.00    | 0.00   | 0.00   | failed                      | 0  | 0  |
| P1413_008_Zm_A_1_MBD_31  | 0   | 0   | 0.00 | 0.00000  | 0.00000 | 0.00000 | 0.00000 | 0.00000 | 0.00000 | 0.00 | 0.00    | 0.00   | 0.00   | 0.00    | 0.00   | 0.00   | 0.00    | 0.00   | 0.00   | 0.00    | 0.00   | 0.00   | failed                      | 0  | 0  |
| P1413_008_Zm_A_1_MBD_33  | 0   | 0   | 0.00 | 0.00000  | 0.00000 | 0.00000 | 0.00000 | 0.00000 | 0.00000 | 0.00 | 0.00    | 0.00   | 0.00   | 0.00    | 0.00   | 0.00   | 0.00    | 0.00   | 0.00   | 0.00    | 0.00   | 0.00   | failed                      | 0  | 0  |
| P1413_008_Zm_A_1_MBD_48  | 0   | 0   | 0.00 | 0.00000  | 0.00000 | 0.00000 | 0.00000 | 0.00000 | 0.00000 | 0.00 | 0.00    | 0.00   | 0.00   | 0.00    | 0.00   | 0.00   | 0.00    | 0.00   | 0.00   | 0.00    | 0.00   | 0.00   | failed                      | 0  | 0  |
| P1413_008_Zm_A_1_MBD_56  | 0   | 0   | 0.00 | 0.00000  | 0.00000 | 0.00000 | 0.00000 | 0.00000 | 0.00000 | 0.00 | 0.00    | 0.00   | 0.00   | 0.00    | 0.00   | 0.00   | 0.00    | 0.00   | 0.00   | 0.00    | 0.00   | 0.00   | failed                      | 0  | 0  |
| P1413_008_Zm_A_1_MBD_58  | 0   | 0   | 0.00 | 0.00000  | 0.00000 | 0.00000 | 0.00000 | 0.00000 | 0.00000 | 0.00 | 0.00    | 0.00   | 0.00   | 0.00    | 0.00   | 0.00   | 0.00    | 0.00   | 0.00   | 0.00    | 0.00   | 0.00   | failed                      | 0  | 0  |
| P1413_008_Zm_A_1_MBD_70  | 0   | 0   | 0.00 | 0.00000  | 0.00000 | 0.00000 | 0.00000 | 0.00000 | 0.00000 | 0.00 | 0.00    | 0.00   | 0.00   | 0.00    | 0.00   | 0.00   | 0.00    | 0.00   | 0.00   | 0.00    | 0.00   | 0.00   | failed                      | 0  | 0  |
| P1413_008_Zm_A_1_MBD_79  | 0   | 0   | 0.00 | 0.00000  | 0.00000 | 0.00000 | 0.00000 | 0.00000 | 0.00000 | 0.00 | 0.00    | 0.00   | 0.00   | 0.00    | 0.00   | 0.00   | 0.00    | 0.00   | 0.00   | 0.00    | 0.00   | 0.00   | failed                      | 0  | 0  |
| P1413_008_Zm_A_1_MBD_90  | 0   | 0   | 0.00 | 0.00000  | 0.00000 | 0.00000 | 0.00000 | 0.00000 | 0.00000 | 0.00 | 0.00    | 0.00   | 0.00   | 0.00    | 0.00   | 0.00   | 0.00    | 0.00   | 0.00   | 0.00    | 0.00   | 0.00   | failed                      | 0  | 0  |
| P1413_008_Zm_A_1_MBD_100 | 0   | 0   | 0.00 | 0.00000  | 0.00000 | 0.00000 | 0.00000 | 0.00000 | 0.00000 | 0.00 | 0.00    | 0.00   | 0.00   | 0.00    | 0.00   | 0.00   | 0.00    | 0.00   | 0.00   | 0.00    | 0.00   | 0.00   | failed                      |    |    |

## Data Repository Item E - U-Pb zircon analytical results from Cantwell Formation bentonites

| Mineral                  | Zircon              |            | Sample Name                       |            | AZZ Name |            | 1413-09 |             |         |                   |            |          |                        |            |          |          |             |          |          |               |          |          |                             |            |             |          |            |             |
|--------------------------|---------------------|------------|-----------------------------------|------------|----------|------------|---------|-------------|---------|-------------------|------------|----------|------------------------|------------|----------|----------|-------------|----------|----------|---------------|----------|----------|-----------------------------|------------|-------------|----------|------------|-------------|
|                          | OSDOB               |            |                                   |            |          |            |         |             |         |                   |            |          |                        |            |          |          |             |          |          |               |          |          |                             |            |             |          |            |             |
|                          | Uranium and Thorium |            | Concordant Scans: Isotopic Ratios |            |          |            |         |             |         |                   |            |          | Concordant Scans: Ages |            |          |          |             |          |          |               |          |          | Preferred Age (Ma)          |            |             | Age Type | Concordant | Total Scans |
| Analysis Name            | [U] (ppm)           | [Th] (ppm) | U/Th                              | 207Pb/235U | 2 sigma  | 206Pb/238U | 2 sigma | 207Pb/206Pb | 2 sigma | Error Correlation | 207Pb/235U | 2 -sigma | 2 +sigma               | 206Pb/238U | 2 -sigma | 2 +sigma | 207Pb/206Pb | 2 -sigma | 2 +sigma | Preferred Age | 2 -sigma | 2 +sigma | Age Type                    | Concordant | Total Scans |          |            |             |
| P1413_009_Zrn A_1_MBD_45 | 289                 | 83         | 3.47                              | 0.06927    | 0.00875  | 0.00982    | 0.00060 | 0.05117     | 0.00687 | 0.09              | 68.00      | 8.32     | 8.29                   | 62.98      | 3.82     | 3.82     | 248.27      | 324.78   | 295.26   | 62.98         | 3.82     | 3.82     | 206Pb/238U concordant scans | 19         | 31          |          |            |             |
| P1413_009_Zrn A_1_MBD_0  | 227                 | 48         | 4.74                              | 0.07795    | 0.01566  | 0.00999    | 0.00049 | 0.05661     | 0.01151 | 0.06              | 76.22      | 14.80    | 14.69                  | 64.06      | 3.13     | 3.13     | 476.38      | 484.08   | 420.45   | 64.06         | 3.13     | 3.13     | 206Pb/238U concordant scans | 22         | 31          |          |            |             |
| P1413_009_Zrn A_1_MBD_43 | 320                 | 126        | 2.55                              | 0.08018    | 0.01556  | 0.01007    | 0.00051 | 0.05774     | 0.01133 | 0.08              | 78.31      | 14.68    | 14.58                  | 64.60      | 3.27     | 3.27     | 520.03      | 462.16   | 403.67   | 64.60         | 3.27     | 3.27     | 206Pb/238U concordant scans | 18         | 31          |          |            |             |
| P1413_009_Zrn A_1_MBD_11 | 839                 | 562        | 1.49                              | 0.06861    | 0.00917  | 0.01015    | 0.00052 | 0.04904     | 0.00656 | 0.17              | 67.38      | 8.73     | 8.69                   | 65.09      | 3.35     | 3.35     | 149.60      | 299.19   | 299.51   | 65.09         | 3.35     | 3.35     | 206Pb/238U concordant scans | 13         | 31          |          |            |             |
| P1413_009_Zrn A_1_MBD_28 | 560                 | 297        | 1.89                              | 0.07056    | 0.00875  | 0.01030    | 0.00058 | 0.04968     | 0.00652 | 0.07              | 69.23      | 8.31     | 8.28                   | 66.07      | 3.70     | 3.70     | 179.89      | 321.17   | 292.40   | 66.07         | 3.70     | 3.70     | 206Pb/238U concordant scans | 16         | 31          |          |            |             |
| P1413_009_Zrn A_1_MBD_37 | 326                 | 98         | 3.32                              | 0.07294    | 0.03797  | 0.01031    | 0.00081 | 0.05131     | 0.02680 | 0.05              | 71.49      | 36.25    | 35.62                  | 66.12      | 5.19     | 5.19     | 254.83      | 509.66   | 1020.27  | 66.12         | 5.19     | 5.19     | 206Pb/238U concordant scans | 4          | 31          |          |            |             |
| P1413_009_Zrn A_1_MBD_44 | 523                 | 263        | 1.99                              | 0.07083    | 0.00894  | 0.01032    | 0.00046 | 0.04976     | 0.00633 | 0.13              | 69.48      | 8.49     | 8.46                   | 66.21      | 2.93     | 2.93     | 183.87      | 310.37   | 283.41   | 66.21         | 2.93     | 2.93     | 206Pb/238U concordant scans | 26         | 31          |          |            |             |
| P1413_009_Zrn A_1_MBD_51 | 488                 | 211        | 2.31                              | 0.07078    | 0.01141  | 0.01033    | 0.00050 | 0.04971     | 0.00797 | 0.15              | 69.44      | 10.85    | 10.79                  | 66.24      | 3.16     | 3.16     | 181.33      | 362.66   | 353.81   | 66.24         | 3.16     | 3.16     | 206Pb/238U concordant scans | 13         | 31          |          |            |             |
| P1413_009_Zrn A_1_MBD_36 | 280                 | 112        | 2.50                              | 0.07243    | 0.01416  | 0.01034    | 0.00053 | 0.05080     | 0.01004 | 0.07              | 71.00      | 13.45    | 13.36                  | 66.32      | 3.36     | 3.35     | 231.89      | 463.78   | 426.98   | 66.32         | 3.36     | 3.35     | 206Pb/238U concordant scans | 20         | 31          |          |            |             |
| P1413_009_Zrn A_1_MBD_10 | 414                 | 189        | 2.19                              | 0.06882    | 0.00936  | 0.01038    | 0.00042 | 0.04806     | 0.00666 | 0.05              | 67.58      | 8.91     | 8.87                   | 66.60      | 2.65     | 2.65     | 102.45      | 204.90   | 312.09   | 66.60         | 2.65     | 2.65     | 206Pb/238U concordant scans | 16         | 31          |          |            |             |
| P1413_009_Zrn A_1_MBD_3  | 381                 | 131        | 2.91                              | 0.07524    | 0.01413  | 0.01044    | 0.00047 | 0.05229     | 0.00982 | 0.11              | 73.66      | 13.39    | 13.30                  | 66.92      | 2.97     | 2.97     | 298.01      | 459.42   | 402.31   | 66.92         | 2.97     | 2.97     | 206Pb/238U concordant scans | 19         | 31          |          |            |             |
| P1413_009_Zrn A_1_MBD_78 | 309                 | 108        | 2.86                              | 0.07872    | 0.01776  | 0.01056    | 0.00041 | 0.05409     | 0.01226 | 0.04              | 76.94      | 16.79    | 16.65                  | 67.69      | 2.59     | 2.59     | 374.97      | 555.09   | 473.45   | 67.69         | 2.59     | 2.59     | 206Pb/238U concordant scans | 24         | 31          |          |            |             |
| P1413_009_Zrn A_1_MBD_58 | 445                 | 185        | 2.41                              | 0.07420    | 0.01080  | 0.01059    | 0.00051 | 0.05083     | 0.00761 | 0.06              | 72.68      | 10.24    | 10.19                  | 67.90      | 3.26     | 3.26     | 232.92      | 365.55   | 328.61   | 67.90         | 3.26     | 3.26     | 206Pb/238U concordant scans | 16         | 31          |          |            |             |
| P1413_009_Zrn A_1_MBD_42 | 606                 | 362        | 1.67                              | 0.06897    | 0.00851  | 0.01060    | 0.00060 | 0.04719     | 0.00587 | 0.20              | 67.72      | 8.10     | 8.07                   | 67.97      | 3.84     | 3.84     | 58.79       | 117.58   | 283.87   | 67.97         | 3.84     | 3.84     | 206Pb/238U concordant scans | 16         | 31          |          |            |             |
| P1413_009_Zrn A_1_MBD_1  | 252                 | 77         | 3.25                              | 0.07377    | 0.01713  | 0.01062    | 0.00048 | 0.05037     | 0.01175 | 0.06              | 72.27      | 16.27    | 16.14                  | 68.12      | 3.05     | 3.05     | 212.08      | 424.15   | 500.10   | 68.12         | 3.05     | 3.05     | 206Pb/238U concordant scans | 17         | 31          |          |            |             |
| P1413_009_Zrn A_1_MBD_39 | 248                 | 89         | 2.80                              | 0.06914    | 0.01650  | 0.01062    | 0.00074 | 0.04720     | 0.01131 | 0.13              | 67.88      | 15.73    | 15.61                  | 68.12      | 4.71     | 4.70     | 59.54       | 119.08   | 526.28   | 68.12         | 4.71     | 4.70     | 206Pb/238U concordant scans | 9          | 31          |          |            |             |
| P1413_009_Zrn A_1_MBD_33 | 491                 | 285        | 1.72                              | 0.08211    | 0.01586  | 0.01067    | 0.00063 | 0.05582     | 0.01103 | 0.06              | 80.13      | 14.94    | 14.83                  | 68.41      | 4.02     | 4.02     | 445.29      | 472.12   | 411.50   | 68.41         | 4.02     | 4.02     | 206Pb/238U concordant scans | 13         | 31          |          |            |             |
| P1413_009_Zrn A_1_MBD_52 | 243                 | 81         | 2.99                              | 0.07289    | 0.01800  | 0.01067    | 0.00069 | 0.04953     | 0.01233 | 0.09              | 71.43      | 17.10    | 16.96                  | 68.43      | 4.38     | 4.37     | 173.16      | 346.32   | 534.49   | 68.43         | 4.38     | 4.37     | 206Pb/238U concordant scans | 9          | 31          |          |            |             |
| P1413_009_Zrn A_1_MBD_5  | 268                 | 80         | 3.37                              | 0.07655    | 0.01817  | 0.01068    | 0.00072 | 0.05197     | 0.01238 | 0.12              | 74.90      | 17.21    | 17.07                  | 68.51      | 4.59     | 4.59     | 283.93      | 567.85   | 503.55   | 68.51         | 4.59     | 4.59     | 206Pb/238U concordant scans | 14         | 31          |          |            |             |
| P1413_009_Zrn A_1_MBD_14 | 295                 | 89         | 3.32                              | 0.08910    | 0.03428  | 0.01069    | 0.00054 | 0.06044     | 0.02335 | 0.03              | 86.67      | 32.22    | 31.71                  | 68.56      | 3.43     | 3.43     | 619.36      | 965.75   | 739.72   | 68.56         | 3.43     | 3.43     | 206Pb/238U concordant scans | 10         | 31          |          |            |             |
| P1413_009_Zrn A_1_MBD_6  | 176                 | 59         | 2.97                              | 0.06928    | 0.02224  | 0.01069    | 0.00095 | 0.04698     | 0.01547 | 0.04              | 68.01      | 21.23    | 21.01                  | 68.58      | 6.05     | 6.04     | 48.31       | 96.62    | 704.83   | 68.58         | 6.05     | 6.04     | 206Pb/238U concordant scans | 12         | 31          |          |            |             |
| P1413_009_Zrn A_1_MBD_60 | 289                 | 83         | 3.48                              | 0.07653    | 0.01405  | 0.01072    | 0.00065 | 0.05178     | 0.00986 | 0.04              | 74.87      | 13.29    | 13.21                  | 68.73      | 4.15     | 4.15     | 275.70      | 468.26   | 409.15   | 68.73         | 4.15     | 4.15     | 206Pb/238U concordant scans | 16         | 31          |          |            |             |
| P1413_009_Zrn A_1_MBD_38 | 644                 | 391        | 1.65                              | 0.07199    | 0.00937  | 0.01076    | 0.00043 | 0.04854     | 0.00637 | 0.11              | 70.59      | 8.90     | 8.86                   | 68.97      | 2.77     | 2.77     | 125.75      | 251.50   | 295.11   | 68.97         | 2.77     | 2.77     | 206Pb/238U concordant scans | 17         | 31          |          |            |             |
| P1413_009_Zrn A_1_MBD_94 | 314                 | 90         | 3.48                              | 0.07586    | 0.01722  | 0.01076    | 0.00041 | 0.05112     | 0.01167 | 0.04              | 74.24      | 16.32    | 16.19                  | 69.00      | 2.63     | 2.63     | 246.37      | 492.74   | 487.02   | 69.00         | 2.63     | 2.63     | 206Pb/238U concordant scans | 15         | 31          |          |            |             |
| P1413_009_Zrn A_1_MBD_56 | 301                 | 92         | 3.28                              | 0.07643    | 0.01599  | 0.01080    | 0.00054 | 0.05133     | 0.01075 | 0.11              | 74.78      | 15.14    | 15.03                  | 69.24      | 3.47     | 3.47     | 255.81      | 511.63   | 448.76   | 69.24         | 3.47     | 3.47     | 206Pb/238U concordant scans | 18         | 31          |          |            |             |
| P1413_009_Zrn A_1_MBD_89 | 387                 | 137        | 2.83                              | 0.07457    | 0.01047  | 0.01083    | 0.00045 | 0.04995     | 0.00719 | 0.04              | 73.02      | 9.92     | 9.87                   | 69.43      | 2.89     | 2.89     | 192.45      | 353.34   | 318.80   | 69.43         | 2.89     | 2.89     | 206Pb/238U concordant scans | 23         | 31          |          |            |             |
| P1413_009_Zrn A_1_MBD_23 | 266                 | 90         | 2.96                              | 0.07512    | 0.01080  | 0.01083    | 0.00053 | 0.05029     | 0.00745 | 0.06              | 73.54      | 10.23    | 10.18                  | 69.46      | 3.41     | 3.41     | 208.32      | 362.86   | 326.49   | 69.46         | 3.41     | 3.41     | 206Pb/238U concordant scans | 18         | 31          |          |            |             |
| P1413_009_Zrn A_1_MBD_20 | 252                 | 94         | 2.69                              | 0.07362    | 0.02233  | 0.01085    | 0.00074 | 0.04921     | 0.01505 | 0.07              | 72.13      | 21.23    | 21.01                  | 69.56      | 4.72     | 4.72     | 158.07      | 316.14   | 646.67   | 69.56         | 4.72     | 4.72     | 206Pb/238U concordant scans | 22         | 31          |          |            |             |
| P1413_009_Zrn A_1_MBD_31 | 189                 | 58         | 3.27                              | 0.07633    | 0.02377  | 0.01086    | 0.00074 | 0.05099     | 0.01609 | 0.04              | 74.69      | 22.55    | 22.30                  | 69.62      | 4.74     | 4.74     | 240.34      | 480.68   | 655.88   | 69.62         | 4.74     | 4.74     | 206Pb/238U concordant scans | 17         | 31          |          |            |             |
| P1413_009_Zrn A_1_MBD_59 | 311                 | 90         | 3.45                              | 0.07749    | 0.01379  | 0.01086    | 0.00053 | 0.05174     | 0.00934 | 0.07              | 75.78      | 13.04    | 12.95                  | 69.65      | 3.37     | 3.37     | 273.88      | 442.44   | 389.31   | 69.65         | 3.37     | 3.37     | 206Pb/238U concordant scans | 16         | 31          |          |            |             |
| P1413_009_Zrn A_1_MBD_95 | 369                 | 130        | 2.85                              | 0.07839    | 0.01154  | 0.01088    | 0.00053 | 0.05225     | 0.00798 | 0.03              | 76.63      | 10.89    | 10.84                  | 69.77      | 3.37     | 3.36     | 296.37      | 368.52   | 330.87   | 69.77         | 3.37     | 3.36     | 206Pb/238U concordant scans | 17         | 31          |          |            |             |
| P1413_009_Zrn A_1_MBD_65 | 274                 | 121        | 2.26                              | 0.07586    | 0.01428  | 0.01088    | 0.00055 | 0.05055     | 0.00969 | 0.05              | 74.25      | 13.52    | 13.43                  | 69.79      | 3.52     | 3.51     | 220.41      | 440.83   | 415.56   | 69.79         | 3.52     | 3.51     | 206Pb/238U concordant scans | 18         | 31          |          |            |             |
| P1413_009_Zrn A_1_MBD_54 | 337                 | 118        | 2.87                              | 0.07737    | 0.01328  | 0.01092    | 0.00055 | 0.05139     | 0.00898 | 0.07              | 75.67      | 12.55    | 12.48                  | 70.01      | 3.51     | 3.51     | 258.24      | 428.56   | 378.57   | 70.01         | 3.51     | 3.51     | 206Pb/238U concordant scans | 15         | 31          |          |            |             |
| P1413_009_Zrn A_1_MBD_49 | 255                 | 88         | 2.88                              | 0.07634    | 0.01331  | 0.01092    | 0.00069 | 0.05069     | 0.00905 | 0.10              | 74.70      | 12.60    | 12.52                  | 70.04      | 4.41     | 4.41     | 226.56      | 441.30   | 388.57   | 70.04         | 4.41     | 4.41     | 206Pb/238U concordant scans | 12         | 31          |          |            |             |
| P1413_009_Zrn A_1_MBD_13 |                     |            |                                   |            |          |            |         |             |         |                   |            |          |                        |            |          |          |             |          |          |               |          |          |                             |            |             |          |            |             |

|                           |     |      |      |         |         |         |         |         |         |      |         |       |       |         |       |       |         |        |        |         |       |       |                                |      |    |   |
|---------------------------|-----|------|------|---------|---------|---------|---------|---------|---------|------|---------|-------|-------|---------|-------|-------|---------|--------|--------|---------|-------|-------|--------------------------------|------|----|---|
| P1413_009_Zrn_A_1_MBD_113 | 218 | 70   | 3.10 | 0.08018 | 0.01696 | 0.01156 | 0.00099 | 0.05030 | 0.01128 | 0.04 | 78.31   | 16.01 | 15.88 | 74.09   | 6.28  | 6.28  | 209.09  | 418.17 | 482.07 | 74.09   | 6.28  | 6.28  | 206Pb/238U concordant scans    | 17   | 31 |   |
| P1413_009_Zrn_A_1_MBD_82  | 273 | 127  | 2.14 | 0.07650 | 0.01479 | 0.01165 | 0.00071 | 0.04762 | 0.00950 | 0.04 | 74.85   | 14.00 | 13.90 | 74.68   | 4.54  | 4.54  | 80.37   | 160.74 | 442.57 | 74.68   | 4.54  | 4.54  | 206Pb/238U concordant scans    | 20   | 31 |   |
| P1413_009_Zrn_A_1_MBD_67  | 259 | 104  | 2.49 | 0.08551 | 0.01669 | 0.01168 | 0.00070 | 0.05308 | 0.01070 | 0.03 | 83.32   | 15.67 | 15.55 | 74.89   | 4.47  | 4.47  | 332.24  | 492.57 | 427.37 | 74.89   | 4.47  | 4.47  | 206Pb/238U concordant scans    | 17   | 31 |   |
| P1413_009_Zrn_A_1_MBD_110 | 265 | 116  | 2.28 | 0.08906 | 0.02901 | 0.01176 | 0.00100 | 0.05494 | 0.01815 | 0.07 | 86.62   | 27.23 | 26.87 | 75.34   | 6.36  | 6.35  | 409.87  | 819.74 | 664.58 | 75.34   | 6.36  | 6.35  | 206Pb/238U concordant scans    | 7    | 31 |   |
| P1413_009_Zrn_A_1_MBD_15  | 365 | 146  | 2.50 | 0.08470 | 0.01397 | 0.01177 | 0.00055 | 0.05221 | 0.00870 | 0.09 | 82.55   | 13.12 | 13.03 | 75.40   | 3.51  | 3.51  | 294.64  | 404.46 | 359.55 | 75.40   | 3.51  | 3.51  | 206Pb/238U concordant scans    | 15   | 31 |   |
| P1413_009_Zrn_A_1_MBD_16  | 260 | 83   | 3.13 | 0.08407 | 0.02177 | 0.01184 | 0.00105 | 0.05149 | 0.01371 | 0.08 | 81.97   | 20.49 | 20.29 | 75.89   | 6.70  | 6.70  | 262.83  | 525.67 | 559.65 | 75.89   | 6.70  | 6.70  | 206Pb/238U concordant scans    | 9    | 31 |   |
| P1413_009_Zrn_A_1_MBD_34  | 320 | 116  | 2.76 | 0.09134 | 0.02583 | 0.01192 | 0.00085 | 0.05557 | 0.01580 | 0.10 | 88.75   | 24.17 | 23.89 | 76.40   | 5.39  | 5.39  | 435.04  | 704.50 | 577.50 | 76.40   | 5.39  | 5.39  | 206Pb/238U concordant scans    | 9    | 31 |   |
| P1413_009_Zrn_A_1_MBD_68  | 270 | 111  | 2.44 | 0.08366 | 0.01652 | 0.01216 | 0.00091 | 0.04989 | 0.01021 | 0.08 | 81.58   | 15.54 | 15.42 | 77.94   | 5.80  | 5.80  | 189.67  | 379.34 | 444.40 | 77.94   | 5.80  | 5.80  | 206Pb/238U concordant scans    | 10   | 31 |   |
| P1413_009_Zrn_A_1_MBD_81  | 167 | 49   | 3.43 | 0.10307 | 0.03235 | 0.01247 | 0.00111 | 0.05996 | 0.01943 | 0.02 | 99.61   | 30.00 | 29.56 | 79.88   | 7.06  | 7.06  | 602.00  | 791.46 | 633.24 | 79.88   | 7.06  | 7.06  | 206Pb/238U concordant scans    | 12   | 31 |   |
| P1413_009_Zrn_A_1_MBD_93  | 128 | 62   | 2.06 | 0.18142 | 0.03568 | 0.02438 | 0.00177 | 0.05396 | 0.01096 | 0.09 | 169.29  | 30.90 | 30.44 | 155.30  | 11.12 | 11.11 | 369.48  | 493.09 | 427.63 | 155.30  | 11.12 | 11.11 | 206Pb/238U concordant scans    | 9    | 31 |   |
| P1413_009_Zrn_A_1_MBD_55  | 183 | 67   | 2.72 | 0.18001 | 0.03005 | 0.02491 | 0.00150 | 0.05241 | 0.00905 | 0.07 | 168.07  | 26.02 | 25.70 | 158.61  | 9.41  | 9.41  | 303.42  | 419.45 | 371.32 | 158.61  | 9.41  | 9.41  | 206Pb/238U concordant scans    | 10   | 31 |   |
| P1413_009_Zrn_A_1_MBD_50  | 239 | 104  | 2.29 | 0.19202 | 0.02867 | 0.02512 | 0.00117 | 0.05544 | 0.00811 | 0.21 | 178.35  | 24.57 | 24.28 | 159.94  | 7.38  | 7.38  | 429.90  | 343.98 | 310.68 | 159.94  | 7.38  | 7.38  | 206Pb/238U concordant scans    | 20   | 31 |   |
| P1413_009_Zrn_A_1_MBD_75  | 164 | 59   | 2.77 | 0.18219 | 0.02817 | 0.02521 | 0.00153 | 0.05241 | 0.00828 | 0.13 | 169.95  | 24.34 | 24.06 | 160.52  | 9.64  | 9.64  | 303.34  | 381.44 | 341.22 | 160.52  | 9.64  | 9.64  | 206Pb/238U concordant scans    | 12   | 31 |   |
| P1413_009_Zrn_A_1_MBD_96  | 93  | 37   | 2.55 | 0.16803 | 0.04891 | 0.02536 | 0.00133 | 0.04805 | 0.01411 | 0.03 | 157.71  | 42.97 | 42.08 | 161.46  | 8.36  | 8.36  | 101.70  | 203.40 | 629.44 | 161.46  | 8.36  | 8.36  | 206Pb/238U concordant scans    | 21   | 31 |   |
| P1413_009_Zrn_A_1_MBD_17  | 121 | 46   | 2.63 | 0.17789 | 0.02930 | 0.02576 | 0.00122 | 0.05008 | 0.00839 | 0.06 | 166.25  | 25.41 | 25.10 | 163.97  | 7.67  | 7.67  | 198.73  | 397.47 | 367.40 | 163.97  | 7.67  | 7.67  | 206Pb/238U concordant scans    | 24   | 31 |   |
| P1413_009_Zrn_A_1_MBD_8   | 154 | 78   | 1.97 | 0.16953 | 0.02857 | 0.02581 | 0.00131 | 0.04765 | 0.00814 | 0.09 | 159.01  | 24.96 | 24.66 | 164.25  | 8.22  | 8.22  | 81.75   | 163.50 | 382.30 | 164.25  | 8.22  | 8.22  | 206Pb/238U concordant scans    | 21   | 31 |   |
| P1413_009_Zrn_A_1_MBD_25  | 257 | 110  | 2.34 | 0.17656 | 0.01735 | 0.02599 | 0.00080 | 0.04927 | 0.00487 | 0.09 | 165.09  | 15.03 | 14.92 | 165.40  | 5.02  | 5.02  | 160.77  | 239.62 | 223.26 | 165.40  | 5.02  | 5.02  | 206Pb/238U concordant scans    | 27   | 31 |   |
| P1413_009_Zrn_A_1_MBD_105 | 167 | 93   | 1.79 | 0.18484 | 0.02070 | 0.02603 | 0.00128 | 0.05151 | 0.00594 | 0.13 | 172.21  | 17.81 | 17.66 | 165.63  | 8.07  | 8.07  | 263.64  | 276.14 | 254.49 | 165.63  | 8.07  | 8.07  | 206Pb/238U concordant scans    | 18   | 31 |   |
| P1413_009_Zrn_A_1_MBD_53  | 137 | 67   | 2.05 | 0.19741 | 0.01962 | 0.02621 | 0.00122 | 0.05462 | 0.00543 | 0.21 | 182.93  | 16.71 | 16.57 | 166.79  | 7.66  | 7.66  | 396.76  | 230.99 | 215.52 | 166.79  | 7.66  | 7.66  | 206Pb/238U concordant scans    | 25   | 31 |   |
| P1413_009_Zrn_A_1_MBD_24  | 297 | 130  | 2.28 | 0.18328 | 0.01899 | 0.02623 | 0.00090 | 0.05067 | 0.00521 | 0.16 | 170.88  | 16.36 | 16.23 | 166.93  | 5.63  | 5.62  | 225.83  | 246.70 | 229.32 | 166.93  | 5.63  | 5.62  | 206Pb/238U concordant scans    | 16   | 31 |   |
| P1413_009_Zrn_A_1_MBD_97  | 123 | 44   | 2.80 | 0.18724 | 0.03054 | 0.02637 | 0.00168 | 0.05150 | 0.00885 | 0.04 | 174.27  | 26.29 | 25.95 | 167.78  | 10.55 | 10.54 | 263.35  | 420.28 | 372.08 | 167.78  | 10.55 | 10.54 | 206Pb/238U concordant scans    | 16   | 31 |   |
| P1413_009_Zrn_A_1_MBD_100 | 151 | 64   | 2.37 | 0.18930 | 0.03388 | 0.02652 | 0.00133 | 0.05178 | 0.00922 | 0.11 | 176.03  | 29.13 | 28.72 | 168.71  | 8.33  | 8.32  | 275.58  | 441.02 | 388.20 | 168.71  | 8.33  | 8.32  | 206Pb/238U concordant scans    | 18   | 31 |   |
| P1413_009_Zrn_A_1_MBD_70  | 230 | 146  | 1.57 | 0.17895 | 0.02679 | 0.02652 | 0.00161 | 0.04893 | 0.00738 | 0.17 | 167.16  | 23.20 | 22.94 | 168.76  | 10.13 | 10.12 | 144.48  | 288.95 | 335.92 | 168.76  | 10.13 | 10.12 | 206Pb/238U concordant scans    | 16   | 31 |   |
| P1413_009_Zrn_A_1_MBD_108 | 104 | 49   | 2.12 | 0.19839 | 0.03266 | 0.02679 | 0.00200 | 0.05370 | 0.00922 | 0.12 | 183.76  | 27.87 | 27.49 | 170.44  | 12.59 | 12.58 | 358.69  | 412.82 | 365.97 | 170.44  | 12.59 | 12.58 | 206Pb/238U concordant scans    | 10   | 31 |   |
| P1413_009_Zrn_A_1_MBD_79  | 544 | 244  | 2.23 | 0.17279 | 0.01512 | 0.02698 | 0.00101 | 0.04645 | 0.00405 | 0.19 | 161.84  | 13.14 | 13.05 | 171.63  | 6.32  | 6.32  | 20.81   | 41.63  | 203.14 | 171.63  | 6.32  | 6.32  | 206Pb/238U concordant scans    | 14   | 31 |   |
| P1413_009_Zrn_A_1_MBD_7   | 592 | 381  | 1.55 | 0.19051 | 0.01326 | 0.02702 | 0.00098 | 0.05114 | 0.00345 | 0.28 | 177.06  | 11.34 | 11.28 | 171.85  | 6.14  | 6.14  | 247.29  | 159.20 | 151.77 | 171.85  | 6.14  | 6.14  | 206Pb/238U concordant scans    | 14   | 31 |   |
| P1413_009_Zrn_A_1_MBD_116 | 178 | 57   | 3.14 | 0.20097 | 0.02985 | 0.02708 | 0.00121 | 0.05382 | 0.00803 | 0.12 | 185.94  | 25.39 | 25.08 | 172.25  | 7.60  | 7.59  | 363.64  | 355.26 | 319.99 | 172.25  | 7.60  | 7.59  | 206Pb/238U concordant scans    | 21   | 31 |   |
| P1413_009_Zrn_A_1_MBD_47  | 163 | 50   | 3.24 | 0.19380 | 0.03242 | 0.02710 | 0.00171 | 0.05186 | 0.00873 | 0.16 | 179.86  | 27.76 | 27.39 | 172.39  | 10.75 | 10.74 | 279.28  | 410.14 | 364.07 | 172.39  | 10.75 | 10.74 | 206Pb/238U concordant scans    | 15   | 31 |   |
| P1413_009_Zrn_A_1_MBD_104 | 172 | 93   | 1.85 | 0.19682 | 0.02478 | 0.02711 | 0.00094 | 0.05265 | 0.00673 | 0.06 | 182.43  | 21.14 | 20.92 | 172.46  | 5.88  | 5.88  | 313.68  | 304.58 | 278.37 | 172.46  | 5.88  | 5.88  | 206Pb/238U concordant scans    | 27   | 31 |   |
| P1413_009_Zrn_A_1_MBD_22  | 106 | 48   | 2.21 | 0.20510 | 0.05170 | 0.02718 | 0.00114 | 0.05473 | 0.01379 | 0.07 | 189.43  | 44.03 | 43.10 | 172.88  | 7.12  | 7.12  | 401.14  | 620.21 | 519.84 | 172.88  | 7.12  | 7.12  | 206Pb/238U concordant scans    | 22   | 31 |   |
| P1413_009_Zrn_A_1_MBD_109 | 141 | 59   | 2.40 | 0.20973 | 0.03005 | 0.02732 | 0.00145 | 0.05568 | 0.00835 | 0.04 | 193.33  | 25.38 | 25.07 | 173.75  | 9.12  | 9.11  | 439.61  | 352.12 | 317.29 | 173.75  | 9.12  | 9.11  | 206Pb/238U concordant scans    | 19   | 31 |   |
| P1413_009_Zrn_A_1_MBD_61  | 106 | 31   | 3.43 | 0.21114 | 0.04732 | 0.02737 | 0.00173 | 0.05596 | 0.01280 | 0.06 | 194.51  | 40.07 | 39.29 | 174.04  | 10.84 | 10.83 | 450.70  | 552.76 | 471.41 | 174.04  | 10.84 | 10.83 | 206Pb/238U concordant scans    | 17   | 31 |   |
| P1413_009_Zrn_A_1_MBD_101 | 211 | 41   | 5.16 | 0.19559 | 0.02212 | 0.02760 | 0.00106 | 0.05140 | 0.00594 | 0.08 | 181.39  | 18.88 | 18.70 | 175.51  | 6.64  | 6.63  | 258.63  | 276.78 | 255.04 | 175.51  | 6.64  | 6.63  | 206Pb/238U concordant scans    | 16   | 31 |   |
| P1413_009_Zrn_A_1_MBD_103 | 201 | 76   | 2.64 | 0.20042 | 0.03236 | 0.02762 | 0.00129 | 0.05262 | 0.00847 | 0.15 | 185.48  | 27.55 | 27.19 | 175.66  | 8.07  | 8.06  | 312.51  | 388.58 | 346.90 | 175.66  | 8.07  | 8.06  | 206Pb/238U concordant scans    | 25   | 31 |   |
| P1413_009_Zrn_A_1_MBD_114 | 87  | 33   | 2.60 | 0.22225 | 0.05485 | 0.02819 | 0.00155 | 0.05718 | 0.01421 | 0.07 | 203.78  | 46.09 | 45.07 | 179.22  | 9.75  | 9.74  | 498.35  | 599.99 | 505.06 | 179.22  | 9.75  | 9.74  | 206Pb/238U concordant scans    | 17   | 31 |   |
| P1413_009_Zrn_A_1_MBD_115 | 209 | 95   | 2.20 | 0.25655 | 0.03908 | 0.03260 | 0.00165 | 0.05709 | 0.00891 | 0.08 | 231.89  | 31.83 | 31.34 | 206.77  | 10.29 | 10.28 | 494.84  | 363.97 | 326.76 | 206.77  | 10.29 | 10.28 | 206Pb/238U concordant scans    | 15   | 31 |   |
| P1413_009_Zrn_A_1_MBD_21  | 263 | 117  | 2.25 | 0.23233 | 0.03570 | 0.03349 | 0.00151 | 0.05031 | 0.00770 | 0.14 | 212.12  | 29.63 | 29.20 | 212.36  | 9.39  | 9.39  | 209.43  | 375.56 | 336.73 | 212.36  | 9.39  | 9.39  | 206Pb/238U concordant scans    | 27   | 31 |   |
| P1413_009_Zrn_A_1_MBD_117 | 703 | 1416 | 0.50 | 0.25465 | 0.01553 | 0.03562 | 0.00142 | 0.05185 | 0.00282 | 0.47 | 230.35  | 12.61 | 12.53 | 225.63  | 8.82  | 8.82  | 278.75  | 127.12 | 122.33 | 225.63  | 8.82  | 8.82  | 206Pb/238U concordant scans    | 19   | 31 |   |
| P1413_009_Zrn_A_1_MBD_111 | 186 | 58   | 3.19 | 0.30706 | 0.03839 | 0.04527 | 0.00171 | 0.04919 | 0.00617 | 0.12 | 271.90  | 30.05 | 29.61 | 285.44  | 10.53 | 10.52 | 156.89  | 307.51 | 281.07 | 285.44  | 10.53 | 10.52 | 206Pb/238U concordant scans    | 20   | 31 |   |
| P1413_009_Zrn_A_1_MBD_91  | 388 | 278  | 1.40 | 0.17607 | 0.30383 | 0.41096 | 0.01004 | 0.14429 | 0.00503 | 0.36 | 2250.70 | 33.90 | 33.35 | 2219.32 | 45.96 | 45.80 | 2279.35 | 60.63  | 59.39  | 2250.70 | 33.90 | 33.35 | 207Pb/235U concordant scans    | 29   | 31 |   |
| P1413_009_Zrn_A_1_MBD_72  | 484 | 187  | 2.59 | 0.06709 | 0.01406 | 0.01059 | 0.00038 | 0.04593 | 0.00966 | 0.05 | 65.93   | 13.43 | 13.34 | 67.93   | 2.44  | 2.44  | 0.00    | 0.00   | 460.35 | 0.00    | 0.00  | 0.00  | Pbc-corrected concordant scans | 14   | 31 |   |
| P1413_009_Zrn_A_1_MBD_4   | 0   | 0    | 0.00 | 0.00000 | 0.00000 | 0.00000 | 0.00000 | 0.00000 | 0.00000 | 0.00 | 0.00    | 0.00  | 0.00  | 0.00    | 0.00  | 0.00  | 0.00    | 0.00   | 0.00   | 0.00    | 0.00  | 0.00  | 0.00                           | 0    | 0  |   |
| P1413_009_Zrn_A_1_MBD_9   | 0   | 0    | 0.00 | 0.00000 | 0.00000 | 0.00000 | 0.00000 | 0.00000 | 0.00000 | 0.00 | 0.00    | 0.00  | 0.00  | 0.00    | 0.00  | 0.00  | 0.00    | 0.00   | 0.00   | 0.00    | 0.00  | 0.00  | 0.00                           | 0.00 | 0  | 0 |
| P1413_009_Zrn_A_1_MBD_12  | 0   | 0    | 0.00 |         |         |         |         |         |         |      |         |       |       |         |       |       |         |        |        |         |       |       |                                |      |    |   |
