# Supplementary material
Source: publisher figshare collection journal article supplement (https://gsapubs.figshare.com/ndownloader/files/22411650)
Supplement: Supplementary file 1 [file 22411650 › Supp Item F - Bentonite ZHe raw data.pdf]

Data Repository Item F - Zircon He analytical results from Cantwell Formation bentonite

| Sample Name      | length 1 (mm) | width 1 (mm) | length 2 (mm) | width 2 (mm) | 2X Term | Dim Mass (mg) | rs (mm) | 4He (nmol/g) | ±     | U (ppm) | ±     | Th (ppm) | ±     | eU     | 4He (ncc) | ±     | U (ng) | ±     | Th (ng) | ±     | Th/U  | Raw Date (Ma) | ±    | Ft    | ± (%) | Corrected Date (Ma) | Full Unc. (Ma) | Analytical Uncertainty (Ma) | Notes                       |
|------------------|---------------|--------------|---------------|--------------|---------|---------------|---------|--------------|-------|---------|-------|----------|-------|--------|-----------|-------|--------|-------|---------|-------|-------|---------------|------|-------|-------|---------------------|----------------|-----------------------------|-----------------------------|
| East Fork Toklat | 84.5          | 40.7         | 87.3          | 41.0         | Y       | 0.67          | 24.67   | 223.999      | 0.284 | 1112.79 | 22.54 | 976.27   | 19.91 | 1342.2 | 3.346     | 0.004 | 0.7417 | 0.015 | 0.6507  | 0.008 | 0.877 | 30.86         | 0.51 | 0.568 | 37.3  | 54.29               | 20.27          | 0.51                        | Small, euhedral, inclusions |
| East Fork Toklat | 104.2         | 47.9         | 107.8         | 47.1         | Y       | 1.11          | 29.01   | 19.697       | 0.038 | 143.47  | 3.09  | 63.13    | 1.37  | 158.3  | 0.491     | 0.001 | 0.1595 | 0.003 | 0.0702  | 0.001 | 0.440 | 23.04         | 0.44 | 0.626 | 30.3  | 36.77               | 11.18          | 0.44                        | Small, broken               |
| East Fork Toklat | 103.6         | 51.5         | 100.2         | 50.7         | Y       | 1.24          | 30.74   | 12.286       | 0.027 | 69.77   | 3.31  | 29.09    | 1.39  | 76.6   | 0.341     | 0.001 | 0.0863 | 0.004 | 0.0360  | 0.001 | 0.417 | 29.68         | 1.25 | 0.645 | 26.9  | 46.02               | 12.55          | 1.25                        | Small, broken               |
| Average age:     |               |              |               |              |         |               |         |              |       |         |       |          |       |        |           |       |        |       |         |       |       |               |      | 45.70 |       |                     |                |                             |                             |
| STDEV error:     |               |              |               |              |         |               |         |              |       |         |       |          |       |        |           |       |        |       |         |       |       |               |      | 8.76  |       |                     |                |                             |                             |
