# Supplementary material
Source: publisher figshare collection journal article supplement (https://gsapubs.figshare.com/ndownloader/files/22411650)
Supplement: Supplementary file 1 [file 22411650 › Supp Item G - Bentonite AFT raw data.pdf]

**Data Repository Item G - Apatite fission track analytical results from Cantwell Formation bentonite**

| Sample name      | Number of grains analyzed | Uranium, ppm | Fission Track Age (Error), Ma | Mean Track Length, $\mu\text{m}^*$ | Standard Deviation, $\mu\text{m}$ | Mean Dpar, $\mu\text{m}$ |
|------------------|---------------------------|--------------|-------------------------------|------------------------------------|-----------------------------------|--------------------------|
| East Fork Toklat | 40                        | 11.0         | 9.42 (-2.9,+4.3)              | 13.0 $\pm$ 0.14 [114]              | 1.22                              | 2.38                     |

*Note:*

\*Number in brackets represent the number of tracks counted or measured.
