# Supplementary material
Source: publisher figshare collection journal article supplement (https://gsapubs.figshare.com/ndownloader/files/22411650)
Supplement: Supplementary file 1 [file 22411650 › Supp Item H - Sandstone U-Pb raw data.pdf]

| Data Repository Item H - U/Pb analytical results from zircons from sandstones and an igneous clast |       |       |      |         |      |                |      |        |     |       |        |      |        |                    |        |        |          |      |      |
|----------------------------------------------------------------------------------------------------|-------|-------|------|---------|------|----------------|------|--------|-----|-------|--------|------|--------|--------------------|--------|--------|----------|------|------|
|                                                                                                    |       |       |      |         |      | Isotope ratios |      |        |     |       |        |      |        | Apparent ages (Ma) |        |        |          |      |      |
| Analysis                                                                                           | U     | 206Pb | U/Th | 206Pb*  | ±    | 207Pb*         | ±    | 206Pb* | ±   | error | 206Pb* | ±    | 207Pb* | ±                  | 206Pb* | ±      | Best age | ±    | Conc |
|                                                                                                    | (ppm) | 204Pb |      | 207Pb*  | (%)  | 235U*          | (%)  | 238U   | (%) | corr. | 238U*  | (Ma) | 235U   | (Ma)               | 207Pb* | (Ma)   | (Ma)     | (Ma) | (%)  |
| Sample JT1 (sandstone)                                                                             |       |       |      |         |      |                |      |        |     |       |        |      |        |                    |        |        |          |      |      |
| JT1-49                                                                                             | 554   | 13257 | 2.1  | 21.5340 | 15.5 | 0.0923         | 15.9 | 0.0144 | 3.2 | 0.20  | 92.3   | 2.9  | 89.7   | 13.6               | 20.4   | 374.9  | 92.3     | 2.9  | NA   |
| JT1-38                                                                                             | 582   | 23238 | 2.1  | 20.8970 | 6.7  | 0.0960         | 7.1  | 0.0145 | 2.4 | 0.34  | 93.1   | 2.3  | 93.0   | 6.3                | 92.1   | 158.0  | 93.1     | 2.3  | NA   |
| JT1-18                                                                                             | 1108  | 31429 | 2.2  | 20.9254 | 6.8  | 0.0973         | 7.0  | 0.0148 | 1.8 | 0.26  | 94.5   | 1.7  | 94.3   | 6.3                | 88.8   | 161.3  | 94.5     | 1.7  | NA   |
| JT1-91                                                                                             | 551   | 26106 | 1.8  | 20.5936 | 6.7  | 0.0991         | 7.0  | 0.0148 | 2.1 | 0.30  | 94.7   | 2.0  | 95.9   | 6.4                | 126.6  | 156.8  | 94.7     | 2.0  | NA   |
| JT1-11                                                                                             | 573   | 12931 | 2.0  | 20.1278 | 8.6  | 0.1015         | 9.0  | 0.0148 | 2.9 | 0.32  | 94.8   | 2.7  | 98.2   | 8.5                | 180.1  | 200.2  | 94.8     | 2.7  | NA   |
| JT1-21                                                                                             | 881   | 31956 | 1.2  | 21.1581 | 5.8  | 0.0972         | 6.0  | 0.0149 | 1.4 | 0.24  | 95.5   | 1.4  | 94.2   | 5.4                | 62.5   | 138.6  | 95.5     | 1.4  | NA   |
| JT1-44                                                                                             | 826   | 24137 | 2.2  | 20.0905 | 5.5  | 0.1026         | 5.7  | 0.0150 | 1.3 | 0.22  | 95.7   | 1.2  | 99.2   | 5.4                | 184.5  | 128.9  | 95.7     | 1.2  | NA   |
| JT1-42                                                                                             | 159   | 4194  | 1.9  | 25.8214 | 40.5 | 0.0800         | 40.9 | 0.0150 | 5.6 | 0.14  | 95.8   | 5.3  | 78.1   | 30.8               | -435.1 | 1103.0 | 95.8     | 5.3  | NA   |
| JT1-83                                                                                             | 394   | 12888 | 2.6  | 23.1679 | 14.3 | 0.0892         | 14.8 | 0.0150 | 3.8 | 0.25  | 95.9   | 3.6  | 86.7   | 12.3               | -158.2 | 357.0  | 95.9     | 3.6  | NA   |
| JT1-35                                                                                             | 373   | 10101 | 2.2  | 22.5869 | 7.7  | 0.0915         | 7.9  | 0.0150 | 1.4 | 0.18  | 95.9   | 1.4  | 88.9   | 6.7                | -95.4  | 190.3  | 95.9     | 1.4  | NA   |
| JT1-95                                                                                             | 246   | 7933  | 3.1  | 18.6165 | 17.7 | 0.1110         | 17.8 | 0.0150 | 2.3 | 0.13  | 95.9   | 2.2  | 106.9  | 18.1               | 359.1  | 401.6  | 95.9     | 2.2  | NA   |
| JT1-34                                                                                             | 462   | 12283 | 1.5  | 20.7952 | 4.8  | 0.0994         | 5.3  | 0.0150 | 2.1 | 0.39  | 95.9   | 2.0  | 96.2   | 4.8                | 103.6  | 114.6  | 95.9     | 2.0  | NA   |
| JT1-6                                                                                              | 446   | 17374 | 1.6  | 22.7883 | 13.2 | 0.0909         | 13.5 | 0.0150 | 3.1 | 0.23  | 96.2   | 2.9  | 88.4   | 11.5               | -117.3 | 326.4  | 96.2     | 2.9  | NA   |
| JT1-16                                                                                             | 299   | 5311  | 2.6  | 21.6029 | 15.9 | 0.0960         | 16.2 | 0.0150 | 3.3 | 0.21  | 96.2   | 3.2  | 93.0   | 14.4               | 12.8   | 383.2  | 96.2     | 3.2  | NA   |
| JT1-5                                                                                              | 623   | 27246 | 2.7  | 21.1402 | 8.2  | 0.0981         | 8.5  | 0.0150 | 2.3 | 0.27  | 96.2   | 2.2  | 95.0   | 7.7                | 64.6   | 195.5  | 96.2     | 2.2  | NA   |
| JT1-69                                                                                             | 895   | 42352 | 1.8  | 21.0846 | 6.6  | 0.0984         | 6.9  | 0.0150 | 2.2 | 0.31  | 96.3   | 2.1  | 95.3   | 6.3                | 70.8   | 156.5  | 96.3     | 2.1  | NA   |
| JT1-3                                                                                              | 986   | 21259 | 2.0  | 20.4392 | 5.8  | 0.1016         | 5.9  | 0.0151 | 1.4 | 0.23  | 96.3   | 1.3  | 98.2   | 5.6                | 144.2  | 135.6  | 96.3     | 1.3  | NA   |
| JT1-24                                                                                             | 905   | 40236 | 1.9  | 20.6008 | 6.0  | 0.1009         | 6.1  | 0.0151 | 1.0 | 0.17  | 96.4   | 1.0  | 97.6   | 5.7                | 125.7  | 141.2  | 96.4     | 1.0  | NA   |
| JT1-10                                                                                             | 361   | 20922 | 2.5  | 20.4404 | 17.7 | 0.1018         | 18.6 | 0.0151 | 5.8 | 0.31  | 96.5   | 5.6  | 98.4   | 17.4               | 144.1  | 417.6  | 96.5     | 5.6  | NA   |
| JT1-76                                                                                             | 976   | 45728 | 2.1  | 20.8079 | 3.1  | 0.1003         | 4.4  | 0.0151 | 3.2 | 0.73  | 96.8   | 3.1  | 97.1   | 4.1                | 102.2  | 72.3   | 96.8     | 3.1  | NA   |
| JT1-74                                                                                             | 185   | 6969  | 2.7  | 28.1821 | 23.8 | 0.0742         | 24.3 | 0.0152 | 5.1 | 0.21  | 97.0   | 4.9  | 72.6   | 17.0               | -670.6 | 663.5  | 97.0     | 4.9  | NA   |
| JT1-87                                                                                             | 439   | 9916  | 2.7  | 22.8804 | 13.6 | 0.0914         | 13.9 | 0.0152 | 3.0 | 0.21  | 97.1   | 2.9  | 88.9   | 11.8               | -127.2 | 336.3  | 97.1     | 2.9  | NA   |
| JT1-72                                                                                             | 935   | 29329 | 3.1  | 20.9716 | 5.2  | 0.0998         | 5.4  | 0.0152 | 1.5 | 0.28  | 97.1   | 1.4  | 96.6   | 4.9                | 83.6   | 122.4  | 97.1     | 1.4  | NA   |
| JT1-78                                                                                             | 573   | 14199 | 2.9  | 21.1574 | 5.0  | 0.0990         | 5.2  | 0.0152 | 1.4 | 0.27  | 97.2   | 1.4  | 95.8   | 4.8                | 62.6   | 120.2  | 97.2     | 1.4  | NA   |
| JT1-81                                                                                             | 1815  | 39423 | 1.8  | 21.0856 | 2.1  | 0.0993         | 2.3  | 0.0152 | 0.9 | 0.39  | 97.2   | 0.9  | 96.2   | 2.1                | 70.7   | 50.9   | 97.2     | 0.9  | NA   |
| JT1-23                                                                                             | 430   | 13300 | 1.7  | 22.0973 | 10.6 | 0.0948         | 10.8 | 0.0152 | 2.0 | 0.18  | 97.2   | 1.9  | 92.0   | 9.5                | -41.9  | 259.1  | 97.2     | 1.9  | NA   |
| JT1-48                                                                                             | 297   | 9507  | 1.5  | 19.8986 | 20.0 | 0.1054         | 20.1 | 0.0152 | 1.9 | 0.09  | 97.4   | 1.8  | 101.8  | 19.5               | 206.8  | 467.8  | 97.4     | 1.8  | NA   |
| JT1-14                                                                                             | 181   | 7167  | 2.5  | 17.1103 | 12.2 | 0.1227         | 12.9 | 0.0152 | 4.3 | 0.33  | 97.4   | 4.1  | 117.5  | 14.3               | 546.4  | 267.5  | 97.4     | 4.1  | NA   |
| JT1-54                                                                                             | 287   | 6268  | 2.1  | 22.8283 | 20.2 | 0.0920         | 20.8 | 0.0152 | 4.9 | 0.24  | 97.5   | 4.8  | 89.4   | 17.8               | -121.6 | 503.0  | 97.5     | 4.8  | NA   |
| JT1-37                                                                                             | 544   | 16995 | 1.5  | 20.4065 | 10.5 | 0.1030         | 10.6 | 0.0152 | 1.4 | 0.14  | 97.5   | 1.4  | 99.5   | 10.0               | 148.0  | 246.7  | 97.5     | 1.4  | NA   |
| JT1-59                                                                                             | 858   | 24239 | 1.6  | 21.8005 | 4.2  | 0.0964         | 4.3  | 0.0152 | 1.2 | 0.28  | 97.5   | 1.2  | 93.5   | 3.9                | -9.2   | 100.4  | 97.5     | 1.2  | NA   |
| JT1-51                                                                                             | 306   | 18288 | 1.7  | 23.3182 | 13.8 | 0.0902         | 14.0 | 0.0153 | 2.5 | 0.18  | 97.6   | 2.4  | 87.7   | 11.8               | -174.3 | 344.6  | 97.6     | 2.4  | NA   |
| JT1-47                                                                                             | 283   | 10065 | 2.1  | 20.5809 | 21.9 | 0.1023         | 22.0 | 0.0153 | 2.6 | 0.12  | 97.7   | 2.5  | 98.9   | 20.7               | 128.1  | 519.6  | 97.7     | 2.5  | NA   |
| JT1-73                                                                                             | 791   | 71760 | 1.8  | 20.8773 | 6.1  | 0.1009         | 6.3  | 0.0153 | 1.7 | 0.27  | 97.8   | 1.6  | 97.6   | 5.9                | 94.3   | 144.2  | 97.8     | 1.6  | NA   |
| JT1-77                                                                                             | 318   | 12229 | 2.0  | 19.3189 | 15.8 | 0.1091         | 16.0 | 0.0153 | 2.6 | 0.16  | 97.8   | 2.5  | 105.1  | 16.0               | 274.9  | 364.0  | 97.8     | 2.5  | NA   |
| JT1-50                                                                                             | 487   | 13350 | 1.9  | 21.3018 | 8.1  | 0.0989         | 8.3  | 0.0153 | 1.8 | 0.21  | 97.8   | 1.7  | 95.8   | 7.6                | 46.4   | 194.4  | 97.8     | 1.7  | NA   |
| JT1-2                                                                                              | 569   | 27593 | 2.1  | 21.4351 | 8.6  | 0.0983         | 8.9  | 0.0153 | 2.2 | 0.25  | 97.8   | 2.1  | 95.2   | 8.1                | 31.5   | 205.9  | 97.8     | 2.1  | NA   |
| JT1-64                                                                                             | 466   | 19146 | 3.0  | 21.0209 | 7.6  | 0.1003         | 8.0  | 0.0153 | 2.4 | 0.30  | 97.8   | 2.3  | 97.0   | 7.4                | 78.0   | 180.5  | 97.8     | 2.3  | NA   |
| JT1-63                                                                                             | 515   | 36096 | 2.7  | 21.4996 | 9.6  | 0.0981         | 9.8  | 0.0153 | 1.8 | 0.18  | 97.8   | 1.7  | 95.0   | 8.8                | 24.3   | 230.5  | 97.8     | 1.7  | NA   |
| JT1-36                                                                                             | 295   | 10924 | 1.6  | 21.0632 | 13.8 | 0.1001         | 14.1 | 0.0153 | 2.9 | 0.21  | 97.8   | 2.8  | 96.9   | 13.0               | 73.2   | 328.3  | 97.8     | 2.8  | NA   |
| JT1-25                                                                                             | 367   | 10905 | 1.5  | 22.6262 | 6.0  | 0.0932         | 6.6  | 0.0153 | 2.6 | 0.39  | 97.8   | 2.5  | 90.5   | 5.7                | -99.7  | 148.5  | 97.8     | 2.5  | NA   |
| JT1-30                                                                                             | 392   | 11949 | 3.9  | 20.5061 | 14.5 | 0.1029         | 14.6 | 0.0153 | 2.1 | 0.14  | 97.9   | 2.0  | 99.4   | 13.9               | 136.6  | 341.7  | 97.9     | 2.0  | NA   |
| JT1-66                                                                                             | 294   | 11809 | 2.3  | 21.1212 | 10.8 | 0.0999         | 11.3 | 0.0153 | 3.6 | 0.31  | 97.9   | 3.5  | 96.7   | 10.5               | 66.7   | 257.1  | 97.9     | 3.5  | NA   |
| JT1-40                                                                                             | 332   | 8315  | 2.2  | 20.7114 | 13.5 | 0.1019         | 13.9 | 0.0153 | 3.2 | 0.23  | 97.9   | 3.1  | 98.5   | 13.0               | 113.1  | 320.2  | 97.9     | 3.1  | NA   |
| JT1-85                                                                                             | 1208  | 33361 | 2.7  | 21.1821 | 4.7  | 0.0997         | 5.2  | 0.0153 | 2.1 | 0.41  | 98.0   | 2.1  | 96.5   | 4.8                | 59.9   | 112.2  | 98.0     | 2.1  | NA   |
| JT1-12                                                                                             | 1090  | 38744 | 3.3  | 21.0142 | 5.1  | 0.1005         | 5.4  | 0.0153 | 1.6 | 0.30  | 98.0   | 1.5  | 97.3   | 5.0                | 78.8   | 121.5  | 98.0     | 1.5  | NA   |
| JT1-41                                                                                             | 686   | 13075 | 1.8  | 21.0186 | 8.0  | 0.1005         | 8.1  | 0.0153 | 1.2 | 0.15  | 98.0   | 1.2  | 97.3   | 7.5                | 78.3   | 191.1  | 98.0     | 1.2  | NA   |
| JT1-79                                                                                             | 296   | 6881  | 2.7  | 22.6990 | 16.2 | 0.0931         | 16.5 | 0.0153 | 3.2 | 0.19  | 98.1   | 3.1  | 90.4   | 14.3               | -107.6 | 400.8  | 98.1     | 3.1  | NA   |
| JT1-15                                                                                             | 474   | 14266 | 2.6  | 19.9019 | 6.5  | 0.1062         | 7.3  | 0.0153 | 3.3 | 0.45  | 98.1   | 3.2  | 102.5  | 7.2                | 206.4  | 151.7  | 98.1     | 3.2  | NA   |
| JT1-92                                                                                             | 495   | 20752 | 2.2  | 20.5741 | 10.1 | 0.1029         | 10.4 | 0.0153 | 2.4 | 0.23  | 98.2   | 2.3  | 99.4   | 9.9                | 128.8  | 239.1  | 98.2     | 2.3  | NA   |
| JT1-31                                                                                             | 447   | 12489 | 1.7  | 20.2951 | 10.0 | 0.1044         | 10.4 | 0.0154 | 2.9 | 0.28  | 98.3   | 2.8  | 100.8  | 10.0               | 160.9  | 234.8  | 98.3     | 2.8  | NA   |
| JT1-19                                                                                             | 622   | 25887 | 2.5  | 20.4910 | 6.0  | 0.1034         | 6.3  | 0.0154 | 1.8 | 0.29  | 98.3   | 1.8  | 99.9   | 6.0                | 138.3  | 141.9  | 98.3     | 1.8  | NA   |
| JT1-97                                                                                             | 422   | 13456 | 2.5  | 21.9052 | 12.6 | 0.0968         | 12.8 | 0.0154 | 1.9 | 0.15  |        |      |        |                    |        |        |          |      |      |

|                             |      |        |     |         |      |        |      |        |     |      |        |      |        |      |        |       |        |      |       |
|-----------------------------|------|--------|-----|---------|------|--------|------|--------|-----|------|--------|------|--------|------|--------|-------|--------|------|-------|
| JT1-32                      | 545  | 20559  | 2.7 | 20.7258 | 6.1  | 0.1051 | 6.5  | 0.0158 | 2.1 | 0.33 | 101.1  | 2.1  | 101.5  | 6.3  | 111.5  | 144.8 | 101.1  | 2.1  | NA    |
| JT1-43                      | 563  | 14605  | 2.4 | 22.7136 | 8.4  | 0.0961 | 8.6  | 0.0158 | 2.2 | 0.25 | 101.3  | 2.2  | 93.2   | 7.7  | -109.2 | 205.9 | 101.3  | 2.2  | NA    |
| JT1-62                      | 98   | 6676   | 3.5 | 20.8860 | 32.8 | 0.2018 | 33.3 | 0.0306 | 5.5 | 0.17 | 194.1  | 10.6 | 186.7  | 56.8 | 93.3   | 795.8 | 194.1  | 10.6 | NA    |
| JT1-71                      | 432  | 37713  | 2.7 | 18.5907 | 2.9  | 0.4321 | 3.6  | 0.0583 | 2.1 | 0.59 | 365.1  | 7.5  | 364.7  | 11.0 | 362.3  | 65.6  | 365.1  | 7.5  | NA    |
| JT1-88                      | 194  | 12345  | 2.3 | 18.9236 | 8.7  | 0.4320 | 10.0 | 0.0593 | 5.0 | 0.50 | 371.3  | 18.2 | 364.6  | 30.7 | 322.1  | 197.0 | 371.3  | 18.2 | NA    |
| JT1-94                      | 91   | 9979   | 1.3 | 18.7904 | 11.2 | 0.4485 | 12.6 | 0.0611 | 5.7 | 0.46 | 382.5  | 21.3 | 376.2  | 39.6 | 338.1  | 254.4 | 382.5  | 21.3 | NA    |
| JT1-98                      | 214  | 15899  | 3.3 | 18.0371 | 6.3  | 0.4806 | 7.0  | 0.0629 | 2.9 | 0.42 | 393.1  | 11.2 | 398.5  | 23.0 | 430.0  | 141.4 | 393.1  | 11.2 | NA    |
| JT1-100                     | 159  | 66820  | 1.3 | 17.6317 | 6.2  | 0.4977 | 6.6  | 0.0636 | 2.5 | 0.37 | 397.8  | 9.6  | 410.2  | 22.4 | 480.5  | 136.0 | 397.8  | 9.6  | NA    |
| JT1-93                      | 172  | 22767  | 1.7 | 17.6858 | 5.5  | 0.5299 | 6.3  | 0.0680 | 3.0 | 0.48 | 423.9  | 12.4 | 431.8  | 22.1 | 473.7  | 121.9 | 423.9  | 12.4 | 89.5  |
| JT1-65                      | 200  | 37287  | 3.0 | 17.6141 | 4.1  | 0.5363 | 4.5  | 0.0685 | 1.8 | 0.41 | 427.2  | 7.6  | 436.0  | 15.9 | 482.7  | 90.6  | 427.2  | 7.6  | 88.5  |
| JT1-84                      | 117  | 11018  | 3.7 | 19.9216 | 9.2  | 0.4746 | 9.5  | 0.0686 | 2.5 | 0.26 | 427.6  | 10.3 | 394.4  | 31.2 | 204.1  | 214.2 | 427.6  | 10.3 | 209.5 |
| JT1-68                      | 492  | 147616 | 1.6 | 18.0548 | 1.3  | 0.5480 | 2.4  | 0.0718 | 2.1 | 0.86 | 446.7  | 8.9  | 443.7  | 8.7  | 427.9  | 27.9  | 446.7  | 8.9  | 104.4 |
| JT1-33                      | 428  | 58832  | 1.2 | 17.7943 | 1.0  | 0.5761 | 1.7  | 0.0743 | 1.3 | 0.78 | 462.3  | 5.9  | 461.9  | 6.3  | 460.2  | 23.3  | 462.3  | 5.9  | 100.5 |
| JT1-28                      | 120  | 20100  | 1.8 | 17.2211 | 6.0  | 0.7232 | 6.3  | 0.0903 | 1.7 | 0.28 | 557.5  | 9.2  | 552.6  | 26.7 | 532.4  | 131.7 | 557.5  | 9.2  | 104.7 |
| JT1-17                      | 282  | 115555 | 2.0 | 13.9502 | 0.9  | 1.6147 | 1.2  | 0.1634 | 0.8 | 0.68 | 975.5  | 7.5  | 975.9  | 7.6  | 977.0  | 18.1  | 977.0  | 18.1 | 99.8  |
| JT1-13                      | 102  | 68521  | 2.2 | 12.2681 | 3.2  | 2.3363 | 3.4  | 0.2079 | 1.1 | 0.33 | 1217.5 | 12.7 | 1223.4 | 24.4 | 1233.8 | 63.5  | 1233.8 | 63.5 | 98.7  |
| JT1-20                      | 67   | 53115  | 1.1 | 9.7843  | 1.7  | 4.0126 | 3.3  | 0.2847 | 2.8 | 0.84 | 1615.2 | 39.4 | 1636.7 | 26.5 | 1664.5 | 32.3  | 1664.5 | 32.3 | 97.0  |
| JT1-90                      | 274  | 349494 | 1.5 | 9.3045  | 0.6  | 4.6431 | 1.6  | 0.3133 | 1.5 | 0.93 | 1757.1 | 22.5 | 1757.1 | 13.2 | 1757.0 | 10.7  | 1757.0 | 10.7 | 100.0 |
| JT1-61                      | 205  | 164259 | 2.7 | 8.7918  | 0.5  | 5.0450 | 0.8  | 0.3217 | 0.6 | 0.79 | 1798.0 | 9.9  | 1826.9 | 6.8  | 1860.0 | 8.8   | 1860.0 | 8.8  | 96.7  |
| JT1-89                      | 201  | 94994  | 1.1 | 6.7456  | 0.5  | 7.5355 | 2.1  | 0.3687 | 2.0 | 0.96 | 2023.1 | 34.5 | 2177.2 | 18.5 | 2325.8 | 9.3   | 2325.8 | 9.3  | 87.0  |
| Sample JT8 (volcanic clast) |      |        |     |         |      |        |      |        |     |      |        |      |        |      |        |       |        |      |       |
| JT8-28                      | 464  | 7556   | 2.6 | 20.3904 | 7.0  | 0.0677 | 7.3  | 0.0100 | 1.7 | 0.24 | 64.2   | 1.1  | 66.5   | 4.7  | 149.9  | 165.4 | 64.2   | 1.1  | NA    |
| JT8-2                       | 203  | 7276   | 2.5 | 22.5856 | 10.4 | 0.0612 | 10.9 | 0.0100 | 3.1 | 0.29 | 64.3   | 2.0  | 60.3   | 6.4  | -95.3  | 257.0 | 64.3   | 2.0  | NA    |
| JT8-9                       | 246  | 21154  | 1.7 | 21.5319 | 9.5  | 0.0644 | 10.9 | 0.0101 | 5.3 | 0.48 | 64.5   | 3.4  | 63.4   | 6.7  | 20.7   | 229.0 | 64.5   | 3.4  | NA    |
| JT8-3                       | 1191 | 33781  | 2.3 | 21.4470 | 4.1  | 0.0649 | 4.5  | 0.0101 | 2.0 | 0.43 | 64.7   | 1.3  | 63.8   | 2.8  | 30.2   | 98.2  | 64.7   | 1.3  | NA    |
| JT8-14                      | 736  | 31350  | 2.3 | 20.7103 | 6.7  | 0.0673 | 6.9  | 0.0101 | 1.5 | 0.22 | 64.9   | 1.0  | 66.2   | 4.4  | 113.3  | 159.3 | 64.9   | 1.0  | NA    |
| JT8-17                      | 936  | 53533  | 3.0 | 21.0189 | 5.0  | 0.0670 | 5.4  | 0.0102 | 1.9 | 0.35 | 65.5   | 1.2  | 65.8   | 3.4  | 78.2   | 120.0 | 65.5   | 1.2  | NA    |
| JT8-10                      | 784  | 30331  | 3.9 | 20.7956 | 6.0  | 0.0677 | 6.2  | 0.0102 | 1.3 | 0.21 | 65.5   | 0.9  | 66.5   | 4.0  | 103.5  | 142.7 | 65.5   | 0.9  | NA    |
| JT8-16                      | 801  | 29663  | 2.8 | 21.6696 | 4.5  | 0.0650 | 4.7  | 0.0102 | 1.3 | 0.28 | 65.5   | 0.9  | 64.0   | 2.9  | 5.3    | 109.5 | 65.5   | 0.9  | NA    |
| JT8-29                      | 543  | 13561  | 3.7 | 19.8829 | 9.5  | 0.0709 | 9.8  | 0.0102 | 2.5 | 0.26 | 65.5   | 1.7  | 69.5   | 6.6  | 208.6  | 220.1 | 65.5   | 1.7  | NA    |
| JT8-1                       | 1123 | 37235  | 2.3 | 21.5683 | 5.0  | 0.0654 | 5.2  | 0.0102 | 1.4 | 0.27 | 65.6   | 0.9  | 64.3   | 3.3  | 16.6   | 121.1 | 65.6   | 0.9  | NA    |
| JT8-11                      | 1117 | 28507  | 1.6 | 20.9359 | 5.0  | 0.0674 | 5.3  | 0.0102 | 1.6 | 0.30 | 65.7   | 1.0  | 66.3   | 3.4  | 87.7   | 119.0 | 65.7   | 1.0  | NA    |
| JT8-18                      | 719  | 37046  | 2.8 | 21.4944 | 8.3  | 0.0658 | 8.5  | 0.0103 | 1.8 | 0.21 | 65.7   | 1.1  | 64.7   | 5.3  | 24.8   | 200.5 | 65.7   | 1.1  | NA    |
| JT8-25                      | 563  | 8559   | 2.5 | 19.5054 | 10.2 | 0.0726 | 10.4 | 0.0103 | 1.8 | 0.17 | 65.8   | 1.2  | 71.1   | 7.1  | 252.9  | 235.6 | 65.8   | 1.2  | NA    |
| JT8-12                      | 379  | 11285  | 2.4 | 19.8961 | 14.8 | 0.0712 | 14.9 | 0.0103 | 2.0 | 0.14 | 65.9   | 1.3  | 69.8   | 10.1 | 207.1  | 345.0 | 65.9   | 1.3  | NA    |
| JT8-20                      | 793  | 25598  | 3.3 | 21.2196 | 5.1  | 0.0668 | 5.6  | 0.0103 | 2.3 | 0.41 | 65.9   | 1.5  | 65.6   | 3.6  | 55.6   | 122.3 | 65.9   | 1.5  | NA    |
| JT8-7                       | 799  | 24980  | 2.7 | 20.9642 | 7.8  | 0.0677 | 8.0  | 0.0103 | 2.0 | 0.25 | 66.0   | 1.3  | 66.5   | 5.2  | 84.4   | 184.5 | 66.0   | 1.3  | NA    |
| JT8-4                       | 678  | 24624  | 3.2 | 20.0377 | 4.4  | 0.0709 | 5.1  | 0.0103 | 2.6 | 0.50 | 66.1   | 1.7  | 69.6   | 3.4  | 190.6  | 102.9 | 66.1   | 1.7  | NA    |
| JT8-22                      | 734  | 18800  | 1.4 | 21.5881 | 10.4 | 0.0659 | 10.9 | 0.0103 | 3.4 | 0.31 | 66.2   | 2.3  | 64.8   | 6.9  | 14.4   | 250.0 | 66.2   | 2.3  | NA    |
| JT8-19                      | 641  | 32334  | 3.6 | 21.3985 | 7.1  | 0.0667 | 7.4  | 0.0104 | 2.2 | 0.30 | 66.4   | 1.4  | 65.6   | 4.7  | 35.5   | 169.9 | 66.4   | 1.4  | NA    |
| JT8-6                       | 834  | 23634  | 2.9 | 21.3799 | 8.7  | 0.0668 | 8.9  | 0.0104 | 2.0 | 0.22 | 66.4   | 1.3  | 65.6   | 5.7  | 37.6   | 208.6 | 66.4   | 1.3  | NA    |
| JT8-8                       | 502  | 9360   | 2.6 | 20.5103 | 8.7  | 0.0698 | 9.4  | 0.0104 | 3.5 | 0.37 | 66.6   | 2.3  | 68.5   | 6.2  | 136.1  | 205.3 | 66.6   | 2.3  | NA    |
| JT8-24                      | 657  | 20472  | 3.2 | 20.4038 | 5.1  | 0.0702 | 5.6  | 0.0104 | 2.1 | 0.38 | 66.6   | 1.4  | 68.9   | 3.7  | 148.3  | 120.4 | 66.6   | 1.4  | NA    |
| JT8-13                      | 376  | 7398   | 3.1 | 21.5967 | 18.0 | 0.0666 | 18.5 | 0.0104 | 4.6 | 0.25 | 66.9   | 3.0  | 65.4   | 11.7 | 13.5   | 434.9 | 66.9   | 3.0  | NA    |
| JT8-5                       | 1002 | 56562  | 2.7 | 21.5983 | 6.0  | 0.0666 | 6.1  | 0.0104 | 1.3 | 0.21 | 66.9   | 0.9  | 65.5   | 3.9  | 13.3   | 144.2 | 66.9   | 0.9  | NA    |
| JT8-26                      | 745  | 10362  | 2.4 | 21.0818 | 4.7  | 0.0684 | 4.8  | 0.0105 | 1.2 | 0.24 | 67.1   | 0.8  | 67.2   | 3.1  | 71.1   | 111.2 | 67.1   | 0.8  | NA    |
| JT8-15                      | 211  | 3706   | 2.7 | 19.9700 | 17.7 | 0.0723 | 18.4 | 0.0105 | 5.1 | 0.28 | 67.2   | 3.4  | 70.9   | 12.6 | 198.5  | 413.0 | 67.2   | 3.4  | NA    |
| JT8-27                      | 1132 | 24485  | 2.3 | 21.1464 | 3.2  | 0.0683 | 3.5  | 0.0105 | 1.5 | 0.42 | 67.2   | 1.0  | 67.1   | 2.3  | 63.9   | 75.4  | 67.2   | 1.0  | NA    |
| JT8-21                      | 518  | 8400   | 1.5 | 22.8985 | 13.3 | 0.0639 | 13.4 | 0.0106 | 1.9 | 0.14 | 68.0   | 1.3  | 62.9   | 8.2  | -129.2 | 329.6 | 68.0   | 1.3  | NA    |
| Sample JT9 (sandstone)      |      |        |     |         |      |        |      |        |     |      |        |      |        |      |        |       |        |      |       |
| JT9-64                      | 224  | 3935   | 2.2 | 20.4403 | 3.9  | 0.3913 | 4.1  | 0.0580 | 1.3 | 0.31 | 363.5  | 4.5  | 335.4  | 11.7 | 144.1  | 91.0  | 363.5  | 4.5  | NA    |
| JT9-54                      | 604  | 13255  | 3.5 | 21.5482 | 15.8 | 0.0291 | 16.1 | 0.0046 | 3.0 | 0.19 | 29.3   | 0.9  | 29.2   | 4.6  | 18.9   | 381.6 | 29.3   | 0.9  | NA    |
| JT9-60                      | 761  | 13282  | 3.0 | 27.2712 | 15.3 | 0.0231 | 15.6 | 0.0046 | 3.4 | 0.22 | 29.4   | 1.0  | 23.2   | 3.6  | -580.8 | 415.5 | 29.4   | 1.0  | NA    |
| JT9-65                      | 787  | 7590   | 2.6 | 23.7623 | 16.6 | 0.0271 | 16.8 | 0.0047 | 2.5 | 0.15 | 30.1   | 0.8  | 27.2   | 4.5  | -221.5 | 419.9 | 30.1   | 0.8  | NA    |
| JT9-96                      | 457  | 11941  | 2.5 | 21.1667 | 10.8 | 0.0684 | 11.0 | 0.0105 | 2.2 | 0.20 | 67.4   | 1.5  | 67.2   | 7.2  | 61.6   | 258.1 | 67.4   | 1.5  | NA    |
| JT9-56                      | 449  | 16884  | 2.4 | 20.1507 | 12.7 | 0.0720 | 13.0 | 0.0105 | 2.6 | 0.20 | 67.4   | 1.7  | 70.6   | 8.8  | 177.5  |       |        |      |       |

|                         |      |        |      |         |      |        |      |        |     |      |        |      |        |      |        |       |        |      |       |
|-------------------------|------|--------|------|---------|------|--------|------|--------|-----|------|--------|------|--------|------|--------|-------|--------|------|-------|
| JT9-8                   | 949  | 78375  | 2.6  | 20.9872 | 4.1  | 0.0981 | 4.8  | 0.0149 | 2.5 | 0.52 | 95.6   | 2.4  | 95.1   | 4.4  | 81.8   | 97.8  | 95.6   | 2.4  | NA    |
| JT9-27                  | 429  | 17092  | 2.2  | 21.1550 | 7.6  | 0.0974 | 8.1  | 0.0149 | 2.6 | 0.33 | 95.7   | 2.5  | 94.4   | 7.3  | 62.9   | 181.7 | 95.7   | 2.5  | NA    |
| JT9-98                  | 1135 | 42499  | 2.3  | 20.7753 | 3.5  | 0.0993 | 3.9  | 0.0150 | 1.7 | 0.44 | 95.8   | 1.6  | 96.2   | 3.6  | 105.8  | 82.5  | 95.8   | 1.6  | NA    |
| JT9-40                  | 1153 | 41179  | 2.5  | 20.1576 | 7.8  | 0.1025 | 7.9  | 0.0150 | 1.3 | 0.17 | 95.9   | 1.3  | 99.1   | 7.5  | 176.7  | 183.0 | 95.9   | 1.3  | NA    |
| JT9-12                  | 203  | 21586  | 5.2  | 20.5777 | 19.7 | 0.1004 | 19.9 | 0.0150 | 2.7 | 0.14 | 95.9   | 2.6  | 97.2   | 18.4 | 128.4  | 467.5 | 95.9   | 2.6  | NA    |
| JT9-41                  | 1889 | 65241  | 3.5  | 20.7722 | 1.7  | 0.0995 | 1.9  | 0.0150 | 1.0 | 0.51 | 95.9   | 0.9  | 96.3   | 1.8  | 106.2  | 39.7  | 95.9   | 0.9  | NA    |
| JT9-7                   | 910  | 46869  | 3.6  | 21.0777 | 4.5  | 0.0982 | 5.1  | 0.0150 | 2.4 | 0.47 | 96.1   | 2.3  | 95.1   | 4.6  | 71.6   | 106.4 | 96.1   | 2.3  | NA    |
| JT9-72                  | 803  | 61391  | 1.7  | 21.0990 | 3.1  | 0.0981 | 3.3  | 0.0150 | 1.1 | 0.33 | 96.1   | 1.0  | 95.1   | 3.0  | 69.2   | 74.6  | 96.1   | 1.0  | NA    |
| JT9-58                  | 1017 | 57590  | 13.3 | 21.1265 | 3.1  | 0.0981 | 3.5  | 0.0150 | 1.7 | 0.48 | 96.1   | 1.6  | 95.0   | 3.2  | 66.1   | 72.8  | 96.1   | 1.6  | NA    |
| JT9-28                  | 1300 | 52334  | 2.7  | 21.1043 | 2.9  | 0.0982 | 3.1  | 0.0150 | 1.1 | 0.37 | 96.2   | 1.1  | 95.1   | 2.8  | 68.6   | 68.1  | 96.2   | 1.1  | NA    |
| JT9-18                  | 1037 | 36237  | 2.9  | 20.5160 | 3.0  | 0.1010 | 3.3  | 0.0150 | 1.3 | 0.38 | 96.2   | 1.2  | 97.7   | 3.1  | 135.5  | 71.6  | 96.2   | 1.2  | NA    |
| JT9-84                  | 374  | 13149  | 2.0  | 21.2891 | 8.1  | 0.0974 | 8.5  | 0.0150 | 2.5 | 0.30 | 96.2   | 2.4  | 94.3   | 7.7  | 47.9   | 194.4 | 96.2   | 2.4  | NA    |
| JT9-3                   | 1050 | 55214  | 2.6  | 20.0998 | 3.3  | 0.1032 | 3.9  | 0.0151 | 2.2 | 0.56 | 96.3   | 2.1  | 99.8   | 3.7  | 183.4  | 75.8  | 96.3   | 2.1  | NA    |
| JT9-59                  | 381  | 25929  | 2.5  | 20.7479 | 9.7  | 0.1001 | 9.9  | 0.0151 | 2.0 | 0.20 | 96.4   | 1.9  | 96.9   | 9.2  | 109.0  | 230.5 | 96.4   | 1.9  | NA    |
| JT9-14                  | 625  | 40338  | 3.2  | 21.2098 | 3.6  | 0.0980 | 3.7  | 0.0151 | 1.1 | 0.28 | 96.5   | 1.0  | 95.0   | 3.4  | 56.7   | 85.8  | 96.5   | 1.0  | NA    |
| JT9-29                  | 1096 | 39693  | 2.6  | 20.7890 | 2.2  | 0.1001 | 2.6  | 0.0151 | 1.4 | 0.53 | 96.5   | 1.3  | 96.8   | 2.4  | 104.3  | 52.8  | 96.5   | 1.3  | NA    |
| JT9-92                  | 1324 | 94965  | 2.6  | 21.0782 | 2.6  | 0.0988 | 2.8  | 0.0151 | 1.1 | 0.40 | 96.6   | 1.1  | 95.6   | 2.6  | 71.5   | 61.6  | 96.6   | 1.1  | NA    |
| JT9-81                  | 316  | 11123  | 2.6  | 21.8735 | 8.9  | 0.0953 | 9.1  | 0.0151 | 1.5 | 0.17 | 96.8   | 1.5  | 92.5   | 8.0  | -17.2  | 216.6 | 96.8   | 1.5  | NA    |
| JT9-38                  | 662  | 31497  | 4.5  | 21.2053 | 6.3  | 0.0985 | 6.4  | 0.0151 | 1.1 | 0.17 | 96.9   | 1.1  | 95.4   | 5.8  | 57.2   | 150.9 | 96.9   | 1.1  | NA    |
| JT9-94                  | 739  | 58506  | 3.6  | 20.8715 | 4.0  | 0.1001 | 4.1  | 0.0152 | 0.8 | 0.20 | 96.9   | 0.8  | 96.9   | 3.8  | 94.9   | 94.7  | 96.9   | 0.8  | NA    |
| JT9-89                  | 888  | 48434  | 2.3  | 20.7263 | 5.2  | 0.1008 | 5.8  | 0.0152 | 2.5 | 0.43 | 97.0   | 2.4  | 97.5   | 5.4  | 111.5  | 123.0 | 97.0   | 2.4  | NA    |
| JT9-86                  | 645  | 54039  | 2.6  | 21.4657 | 4.8  | 0.0975 | 5.0  | 0.0152 | 1.3 | 0.26 | 97.1   | 1.2  | 94.4   | 4.5  | 28.1   | 115.3 | 97.1   | 1.2  | NA    |
| JT9-24                  | 674  | 39983  | 3.5  | 20.3761 | 5.3  | 0.1027 | 5.5  | 0.0152 | 1.6 | 0.30 | 97.1   | 1.6  | 99.3   | 5.2  | 151.5  | 123.8 | 97.1   | 1.6  | NA    |
| JT9-10                  | 722  | 51816  | 3.0  | 21.0881 | 5.5  | 0.0993 | 5.6  | 0.0152 | 1.2 | 0.22 | 97.1   | 1.2  | 96.1   | 5.1  | 70.5   | 130.3 | 97.1   | 1.2  | NA    |
| JT9-5                   | 1289 | 53092  | 2.3  | 20.5979 | 2.6  | 0.1016 | 2.8  | 0.0152 | 1.2 | 0.41 | 97.2   | 1.1  | 98.3   | 2.6  | 126.1  | 60.7  | 97.2   | 1.1  | NA    |
| JT9-97                  | 409  | 16933  | 2.7  | 21.9157 | 10.2 | 0.0956 | 10.3 | 0.0152 | 1.2 | 0.11 | 97.2   | 1.1  | 92.7   | 9.1  | -21.9  | 247.7 | 97.2   | 1.1  | NA    |
| JT9-2                   | 782  | 17506  | 2.3  | 21.0393 | 5.0  | 0.0998 | 5.2  | 0.0152 | 1.5 | 0.29 | 97.4   | 1.4  | 96.6   | 4.8  | 75.9   | 117.7 | 97.4   | 1.4  | NA    |
| JT9-85                  | 1220 | 52129  | 2.1  | 20.6740 | 2.7  | 0.1016 | 3.1  | 0.0152 | 1.6 | 0.51 | 97.4   | 1.5  | 98.2   | 2.9  | 117.4  | 62.5  | 97.4   | 1.5  | NA    |
| JT9-15                  | 1261 | 54867  | 3.0  | 21.0498 | 1.3  | 0.0998 | 1.8  | 0.0152 | 1.3 | 0.73 | 97.4   | 1.3  | 96.5   | 1.7  | 74.8   | 30.3  | 97.4   | 1.3  | NA    |
| JT9-82                  | 1010 | 5785   | 2.6  | 19.8385 | 3.9  | 0.1059 | 4.2  | 0.0152 | 1.6 | 0.39 | 97.5   | 1.6  | 102.2  | 4.1  | 213.8  | 89.5  | 97.5   | 1.6  | NA    |
| JT9-70                  | 849  | 31478  | 2.6  | 20.4295 | 2.7  | 0.1028 | 3.1  | 0.0152 | 1.5 | 0.49 | 97.5   | 1.5  | 99.4   | 2.9  | 145.4  | 62.7  | 97.5   | 1.5  | NA    |
| JT9-31                  | 876  | 41936  | 2.7  | 20.8107 | 3.5  | 0.1010 | 3.7  | 0.0152 | 1.0 | 0.27 | 97.5   | 1.0  | 97.7   | 3.4  | 101.8  | 83.9  | 97.5   | 1.0  | NA    |
| JT9-16                  | 777  | 41426  | 3.4  | 20.7919 | 3.9  | 0.1013 | 4.1  | 0.0153 | 1.4 | 0.34 | 97.8   | 1.4  | 98.0   | 3.9  | 104.0  | 91.9  | 97.8   | 1.4  | NA    |
| JT9-71                  | 303  | 7347   | 2.4  | 22.4989 | 8.3  | 0.0938 | 8.7  | 0.0153 | 2.6 | 0.29 | 97.9   | 2.5  | 91.0   | 7.6  | -85.9  | 204.0 | 97.9   | 2.5  | NA    |
| JT9-43                  | 431  | 10849  | 2.2  | 22.0541 | 6.4  | 0.0958 | 6.6  | 0.0153 | 1.5 | 0.22 | 98.0   | 1.4  | 92.9   | 5.9  | -37.2  | 156.5 | 98.0   | 1.4  | NA    |
| JT9-37                  | 803  | 32067  | 2.5  | 20.8770 | 2.6  | 0.1013 | 3.6  | 0.0153 | 2.4 | 0.69 | 98.1   | 2.4  | 97.9   | 3.3  | 94.3   | 61.6  | 98.1   | 2.4  | NA    |
| JT9-44                  | 876  | 31156  | 4.3  | 21.0493 | 3.2  | 0.1005 | 3.5  | 0.0153 | 1.5 | 0.43 | 98.1   | 1.5  | 97.2   | 3.2  | 74.8   | 75.1  | 98.1   | 1.5  | NA    |
| JT9-30                  | 972  | 127920 | 2.1  | 20.4335 | 4.6  | 0.1035 | 5.0  | 0.0153 | 1.9 | 0.38 | 98.1   | 1.9  | 100.0  | 4.8  | 144.9  | 108.8 | 98.1   | 1.9  | NA    |
| JT9-22                  | 876  | 25624  | 2.7  | 21.0438 | 3.9  | 0.1007 | 4.6  | 0.0154 | 2.4 | 0.53 | 98.3   | 2.4  | 97.4   | 4.3  | 75.4   | 92.4  | 98.3   | 2.4  | NA    |
| JT9-88                  | 270  | 44317  | 3.6  | 19.2923 | 11.0 | 0.1099 | 11.1 | 0.0154 | 1.9 | 0.17 | 98.4   | 1.8  | 105.9  | 11.2 | 278.1  | 252.2 | 98.4   | 1.8  | NA    |
| JT9-34                  | 1070 | 119548 | 2.5  | 20.6361 | 4.4  | 0.1031 | 4.5  | 0.0154 | 1.1 | 0.24 | 98.7   | 1.1  | 99.6   | 4.3  | 121.7  | 103.6 | 98.7   | 1.1  | NA    |
| JT9-52                  | 663  | 17325  | 2.3  | 21.6330 | 3.6  | 0.0984 | 3.8  | 0.0154 | 1.2 | 0.30 | 98.8   | 1.1  | 95.3   | 3.4  | 9.4    | 86.8  | 98.8   | 1.1  | NA    |
| JT9-87                  | 379  | 13920  | 2.9  | 20.6878 | 14.8 | 0.1034 | 15.0 | 0.0155 | 2.4 | 0.16 | 99.2   | 2.3  | 99.9   | 14.2 | 115.8  | 350.3 | 99.2   | 2.3  | NA    |
| JT9-47                  | 1165 | 79014  | 2.5  | 20.6098 | 3.3  | 0.1039 | 3.7  | 0.0155 | 1.5 | 0.42 | 99.3   | 1.5  | 100.3  | 3.5  | 124.7  | 78.2  | 99.3   | 1.5  | NA    |
| JT9-90                  | 1309 | 61327  | 2.1  | 21.0462 | 1.7  | 0.1017 | 2.5  | 0.0155 | 1.9 | 0.74 | 99.4   | 1.8  | 98.4   | 2.4  | 75.2   | 40.5  | 99.4   | 1.8  | NA    |
| JT9-79                  | 716  | 50944  | 3.5  | 19.8331 | 5.2  | 0.1087 | 5.5  | 0.0156 | 1.8 | 0.33 | 100.0  | 1.8  | 104.7  | 5.5  | 214.5  | 121.1 | 100.0  | 1.8  | NA    |
| JT9-4                   | 686  | 32721  | 2.8  | 19.4254 | 4.6  | 0.1110 | 4.9  | 0.0156 | 1.5 | 0.32 | 100.0  | 1.5  | 106.9  | 4.9  | 262.4  | 105.9 | 100.0  | 1.5  | NA    |
| JT9-19                  | 1240 | 19100  | 2.6  | 20.2431 | 2.5  | 0.1078 | 3.1  | 0.0158 | 1.8 | 0.59 | 101.3  | 1.8  | 104.0  | 3.1  | 166.8  | 58.5  | 101.3  | 1.8  | NA    |
| JT9-46                  | 112  | 9260   | 4.4  | 20.9420 | 19.5 | 0.1279 | 20.4 | 0.0194 | 5.8 | 0.29 | 124.0  | 7.2  | 122.2  | 23.4 | 87.0   | 466.3 | 124.0  | 7.2  | NA    |
| JT9-39                  | 351  | 51196  | 4.7  | 20.1345 | 4.0  | 0.2077 | 4.6  | 0.0303 | 2.3 | 0.50 | 129.6  | 4.4  | 191.6  | 8.0  | 179.4  | 92.8  | 192.6  | 4.4  | NA    |
| JT9-49                  | 162  | 21807  | 1.5  | 18.8132 | 6.5  | 0.4479 | 6.6  | 0.0611 | 1.1 | 0.17 | 382.4  | 4.1  | 375.8  | 20.8 | 335.4  | 148.4 | 382.4  | 4.1  | NA    |
| JT9-69                  | 311  | 66705  | 2.1  | 18.3250 | 3.0  | 0.4608 | 3.6  | 0.0612 | 2.0 | 0.56 | 383.2  | 7.5  | 384.8  | 11.5 | 394.6  | 67.0  | 383.2  | 7.5  | NA    |
| JT9-99                  | 194  | 31119  | 1.1  | 18.4622 | 3.2  | 0.4923 | 3.5  | 0.0659 | 1.6 | 0.44 | 411.5  | 6.3  | 406.5  | 11.9 | 377.9  | 71.4  | 411.5  | 6.3  | 108.9 |
| JT9-83                  | 231  | 61217  | 2.4  | 17.7050 | 1.9  | 0.5196 | 2.4  | 0.0667 | 1.6 | 0.64 | 416.3  | 6.3  | 424.9  | 8.5  | 471.3  | 41.5  | 416.3  | 6.3  | 88.3  |
| JT9-35                  | 230  | 40848  | 3.0  | 18.2063 | 3.1  | 0.5133 | 3.3  | 0.0678 | 1.3 | 0.39 | 422.7  | 5.4  | 420.6  | 11.5 | 409.2  | 68.4  | 422.7  | 5.4  | 103.3 |
| JT9-50                  | 101  | 36505  | 3.8  | 17.6249 | 5.5  | 0.5303 | 5.8  | 0.0678 | 1.9 | 0.32 | 422.8  | 7.6  | 432.0  | 20.6 | 481.3  | 122.6 | 422.8  | 7.6  | 87.8  |
| JT9-20                  | 152  | 63967  | 3.4  | 18.1835 | 3.0  | 0.5198 | 3.6  | 0.0686 | 1.9 | 0.52 | 427.4  | 7.7  | 425.0  | 12.4 | 412.0  | 67.9  | 427.4  | 7.7  | 103.7 |
| JT9-93                  | 54   | 54360  | 1.1  | 11.6881 | 1.5  | 2.6378 | 1.9  | 0.2236 | 1.1 | 0.57 | 1300.9 | 12.4 | 1311.3 | 13.7 | 1328.2 | 29.6  | 1328.2 | 29.6 | 97.9  |
| JT9-48                  | 128  | 156225 | 3.1  | 10.8564 | 1.3  | 3.2570 | 1.6  | 0.2565 | 1.0 | 0.61 | 1471.7 | 12.8 | 1470.9 | 12.4 | 1469.7 | 23.9  | 1469.7 | 23.9 | 100.1 |
| JT9-77                  | 70   | 125725 | 4.2  | 6.7480  | 0.5  | 8.9170 | 2.2  | 0.4364 | 2.2 | 0.98 | 2334.5 | 42.2 | 2329.5 | 20.2 | 2325.2 | 8.1   | 2325.2 | 8.1  | 100.4 |
| Sample JT11 (sandstone) |      |        |      |         |      |        |      |        |     |      |        |      |        |      |        |       |        |      |       |
| JT11-69                 | 291  | 77172  | 2.2  | 10.4292 | 1.7  | 1.1577 | 5.1  | 0.0876 | 4.9 | 0.95 | 541.1  | 25.3 | 780.9  | 28.0 | 1545.5 | 31.3  | 1545.5 | 31.3 | 35.0  |
| JT11-97                 | 334  | 168610 | 1.3  | 14.8752 | 1.6  | 0.8424 | 2.3  | 0.0909 | 1.6 | 0.69 | 560.8  | 8.5  | 620.5  | 10.6 | 844.8  | 34.2  | 560.8  | 8.5  | 66.4  |
| JT11-92                 | 462  | 20832  | 2.1  | 21.7540 | 8.3  | 0.0962 | 8.6  | 0.0152 | 2.2 | 0.25 | 97.1   | 2.1  | 93.2   | 7.7  | -4.0   | 201.2 | 97.1   | 2.1  | NA    |
| JT11-46                 | 306  | 25799  | 3.8  | 21.9551 | 10.5 | 0.0953 | 10.6 | 0.0152 | 1.6 | 0.15 | 97.1   | 1.5  | 92.5   | 9.4  | -26.3  | 254.7 | 97.1   | 1.5  | NA    |
| JT11-82                 | 1346 | 46845  | 2.0  | 20.6821 | 3.3  | 0.1021 | 3.6  | 0.0153 | 1.6 | 0.43 | 98.0   | 1.5  | 98.7   | 3.4  | 116.5  | 77.1  | 98.0   | 1.5  | NA    |
| JT11-17                 | 368  | 42499  | 2.3  | 19.7928 | 8.4  | 0.1    |      |        |     |      |        |      |        |      |        |       |        |      |       |

|          |      |        |      |         |      |        |      |        |     |      |        |      |        |      |        |       |        |      |       |
|----------|------|--------|------|---------|------|--------|------|--------|-----|------|--------|------|--------|------|--------|-------|--------|------|-------|
| JT11-47  | 304  | 39608  | 2.2  | 19.6619 | 3.0  | 0.2251 | 3.5  | 0.0321 | 1.7 | 0.49 | 203.6  | 3.4  | 206.1  | 6.5  | 234.5  | 70.1  | 203.6  | 3.4  | NA    |
| JT11-29  | 485  | 13511  | 2.4  | 14.5547 | 13.9 | 0.3098 | 14.2 | 0.0327 | 2.9 | 0.21 | 207.4  | 6.0  | 274.0  | 34.2 | 889.9  | 289.0 | 207.4  | 6.0  | NA    |
| JT11-81  | 1104 | 178726 | 1.7  | 19.8132 | 1.5  | 0.2276 | 2.3  | 0.0327 | 1.8 | 0.77 | 207.5  | 3.6  | 208.2  | 4.3  | 216.8  | 33.8  | 207.5  | 3.6  | NA    |
| JT11-25  | 105  | 32252  | 1.5  | 20.9372 | 11.1 | 0.2167 | 11.4 | 0.0329 | 2.5 | 0.22 | 208.7  | 5.1  | 199.2  | 20.7 | 87.5   | 265.0 | 208.7  | 5.1  | NA    |
| JT11-3   | 91   | 13761  | 2.3  | 18.7650 | 12.3 | 0.2529 | 12.5 | 0.0344 | 2.1 | 0.17 | 218.2  | 4.5  | 228.9  | 25.5 | 341.2  | 279.1 | 218.2  | 4.5  | NA    |
| JT11-100 | 63   | 10571  | 2.0  | 18.9888 | 19.1 | 0.2536 | 19.2 | 0.0349 | 2.0 | 0.10 | 221.3  | 4.3  | 229.5  | 39.4 | 314.3  | 436.9 | 221.3  | 4.3  | NA    |
| JT11-42  | 64   | 5795   | 2.0  | 20.4240 | 15.7 | 0.2373 | 16.1 | 0.0352 | 3.3 | 0.20 | 222.7  | 7.2  | 216.2  | 31.3 | 146.0  | 370.5 | 222.7  | 7.2  | NA    |
| JT11-95  | 260  | 37316  | 3.6  | 19.7004 | 5.0  | 0.2485 | 5.3  | 0.0355 | 1.9 | 0.36 | 224.9  | 4.2  | 225.4  | 10.8 | 229.9  | 115.3 | 224.9  | 4.2  | NA    |
| JT11-76  | 41   | 7078   | 4.7  | 20.3897 | 29.6 | 0.2674 | 30.3 | 0.0395 | 6.4 | 0.21 | 250.0  | 15.7 | 240.6  | 65.0 | 150.0  | 708.1 | 250.0  | 15.7 | NA    |
| JT11-64  | 286  | 33609  | 1.3  | 19.4424 | 3.2  | 0.2824 | 3.5  | 0.0398 | 1.5 | 0.43 | 251.7  | 3.7  | 252.6  | 7.8  | 260.3  | 72.5  | 251.7  | 3.7  | NA    |
| JT11-60  | 231  | 22955  | 3.9  | 19.0953 | 3.3  | 0.3801 | 3.6  | 0.0526 | 1.5 | 0.41 | 330.7  | 4.7  | 327.1  | 10.2 | 301.5  | 75.8  | 330.7  | 4.7  | NA    |
| JT11-12  | 172  | 18435  | 1.7  | 19.3227 | 4.7  | 0.3848 | 5.0  | 0.0539 | 1.9 | 0.37 | 338.6  | 6.2  | 330.6  | 14.2 | 274.5  | 107.0 | 338.6  | 6.2  | NA    |
| JT11-61  | 295  | 11728  | 2.7  | 17.9705 | 3.5  | 0.4138 | 9.4  | 0.0539 | 8.8 | 0.93 | 338.7  | 28.9 | 351.6  | 28.1 | 438.3  | 78.0  | 338.7  | 28.9 | NA    |
| JT11-85  | 409  | 67161  | 1.7  | 18.6403 | 1.8  | 0.4272 | 2.6  | 0.0577 | 1.9 | 0.72 | 361.9  | 6.6  | 361.2  | 7.9  | 356.3  | 40.5  | 361.9  | 6.6  | NA    |
| JT11-73  | 452  | 48411  | 1.6  | 18.2714 | 2.2  | 0.4772 | 2.4  | 0.0632 | 1.1 | 0.43 | 395.3  | 4.1  | 396.1  | 8.0  | 401.2  | 49.2  | 395.3  | 4.1  | NA    |
| JT11-84  | 193  | 30377  | 2.6  | 18.3563 | 3.9  | 0.4827 | 4.2  | 0.0643 | 1.5 | 0.35 | 401.5  | 5.7  | 399.9  | 13.9 | 390.8  | 88.3  | 401.5  | 5.7  | 102.7 |
| JT11-11  | 100  | 16903  | 1.2  | 18.3469 | 5.1  | 0.4898 | 5.8  | 0.0652 | 2.7 | 0.47 | 407.0  | 10.7 | 404.8  | 19.3 | 392.0  | 114.9 | 407.0  | 10.7 | 103.8 |
| JT11-16  | 155  | 28157  | 2.0  | 18.1333 | 3.5  | 0.5022 | 3.7  | 0.0661 | 1.2 | 0.32 | 412.3  | 4.7  | 413.2  | 12.6 | 418.2  | 78.4  | 412.3  | 4.7  | 98.6  |
| JT11-63  | 203  | 85257  | 2.3  | 17.8137 | 3.1  | 0.5179 | 3.3  | 0.0669 | 1.3 | 0.38 | 417.6  | 5.1  | 423.8  | 11.5 | 457.7  | 68.2  | 417.6  | 5.1  | 91.2  |
| JT11-62  | 108  | 28236  | 1.3  | 17.9466 | 3.8  | 0.5148 | 4.3  | 0.0670 | 1.9 | 0.45 | 418.1  | 7.8  | 421.6  | 14.7 | 441.2  | 84.5  | 418.1  | 7.8  | 94.7  |
| JT11-40  | 168  | 24171  | 2.5  | 17.8789 | 3.0  | 0.5171 | 3.4  | 0.0670 | 1.7 | 0.49 | 418.3  | 6.8  | 423.2  | 11.8 | 449.6  | 66.1  | 418.3  | 6.8  | 93.0  |
| JT11-48  | 246  | 94179  | 1.5  | 18.4380 | 2.3  | 0.5036 | 2.9  | 0.0673 | 1.7 | 0.61 | 420.1  | 7.1  | 414.1  | 9.7  | 380.8  | 51.1  | 420.1  | 7.1  | 110.3 |
| JT11-39  | 85   | 14982  | 2.0  | 18.6518 | 5.0  | 0.4986 | 5.4  | 0.0674 | 2.1 | 0.39 | 420.8  | 8.5  | 410.7  | 18.2 | 354.9  | 112.5 | 420.8  | 8.5  | 118.6 |
| JT11-71  | 102  | 19001  | 1.7  | 18.6170 | 5.7  | 0.4999 | 6.1  | 0.0675 | 2.2 | 0.37 | 421.1  | 9.2  | 411.6  | 20.7 | 359.1  | 128.5 | 421.1  | 9.2  | 117.3 |
| JT11-79  | 335  | 58882  | 2.4  | 17.8766 | 2.2  | 0.5219 | 2.5  | 0.0677 | 1.3 | 0.51 | 422.1  | 5.3  | 426.4  | 8.9  | 449.9  | 48.6  | 422.1  | 5.3  | 93.8  |
| JT11-36  | 110  | 23983  | 1.8  | 18.0133 | 5.7  | 0.5181 | 6.1  | 0.0677 | 1.9 | 0.32 | 422.2  | 7.9  | 423.9  | 21.0 | 433.0  | 128.0 | 422.2  | 7.9  | 97.5  |
| JT11-13  | 65   | 26553  | 2.2  | 17.7952 | 15.9 | 0.5260 | 16.1 | 0.0679 | 2.1 | 0.13 | 423.4  | 8.4  | 429.2  | 56.3 | 460.1  | 355.5 | 423.4  | 8.4  | 92.0  |
| JT11-21  | 107  | 20748  | 2.6  | 18.2606 | 5.4  | 0.5129 | 5.6  | 0.0679 | 1.8 | 0.31 | 423.7  | 7.2  | 420.4  | 19.4 | 402.5  | 120.2 | 423.7  | 7.2  | 105.3 |
| JT11-7   | 116  | 17323  | 1.6  | 18.5933 | 3.5  | 0.5049 | 4.0  | 0.0681 | 2.0 | 0.50 | 424.6  | 8.2  | 415.0  | 13.7 | 361.9  | 78.6  | 424.6  | 8.2  | 117.3 |
| JT11-50  | 166  | 42759  | 2.4  | 17.7135 | 3.6  | 0.5312 | 3.7  | 0.0682 | 0.9 | 0.24 | 425.5  | 3.6  | 432.6  | 13.0 | 470.3  | 79.4  | 425.5  | 3.6  | 90.5  |
| JT11-68  | 303  | 49823  | 1.2  | 18.2625 | 3.0  | 0.5156 | 3.3  | 0.0683 | 1.4 | 0.41 | 425.8  | 5.6  | 422.2  | 11.5 | 402.3  | 67.8  | 425.8  | 5.6  | 105.8 |
| JT11-72  | 54   | 9313   | 2.6  | 18.1671 | 16.3 | 0.5183 | 16.6 | 0.0683 | 3.2 | 0.19 | 425.9  | 13.2 | 424.0  | 57.7 | 414.0  | 366.9 | 425.9  | 13.2 | 102.9 |
| JT11-99  | 210  | 61514  | 1.6  | 18.0039 | 2.8  | 0.5236 | 3.1  | 0.0684 | 1.3 | 0.43 | 426.4  | 5.5  | 427.6  | 10.8 | 434.1  | 61.8  | 426.4  | 5.5  | 98.2  |
| JT11-55  | 76   | 28413  | 2.3  | 18.3342 | 6.2  | 0.5145 | 6.5  | 0.0684 | 1.8 | 0.28 | 426.6  | 7.6  | 421.5  | 22.4 | 393.5  | 139.5 | 426.6  | 7.6  | 108.4 |
| JT11-77  | 204  | 49658  | 2.2  | 18.1950 | 2.9  | 0.5191 | 3.4  | 0.0685 | 1.8 | 0.54 | 427.1  | 7.6  | 424.5  | 11.8 | 410.6  | 63.9  | 427.1  | 7.6  | 104.0 |
| JT11-20  | 120  | 31270  | 1.7  | 18.3662 | 3.3  | 0.5143 | 4.2  | 0.0685 | 2.6 | 0.62 | 427.2  | 10.6 | 421.3  | 14.4 | 389.6  | 73.5  | 427.2  | 10.6 | 109.6 |
| JT11-98  | 287  | 57833  | 1.6  | 18.1285 | 2.3  | 0.5217 | 2.8  | 0.0686 | 1.5 | 0.55 | 427.6  | 6.3  | 426.3  | 9.7  | 418.8  | 51.8  | 427.6  | 6.3  | 102.1 |
| JT11-18  | 76   | 18312  | 2.8  | 18.1890 | 7.0  | 0.5209 | 7.3  | 0.0687 | 1.9 | 0.26 | 428.4  | 7.7  | 425.7  | 25.3 | 411.3  | 157.1 | 428.4  | 7.7  | 104.2 |
| JT11-86  | 95   | 23566  | 1.8  | 18.4039 | 6.5  | 0.5154 | 6.7  | 0.0688 | 1.8 | 0.26 | 428.9  | 7.3  | 422.1  | 23.3 | 385.0  | 146.3 | 428.9  | 7.3  | 111.4 |
| JT11-14  | 91   | 40999  | 2.6  | 18.1451 | 3.8  | 0.5233 | 3.9  | 0.0689 | 1.0 | 0.26 | 429.3  | 4.3  | 427.3  | 13.7 | 416.7  | 84.5  | 429.3  | 4.3  | 103.0 |
| JT11-1   | 71   | 44211  | 3.6  | 19.1688 | 7.0  | 0.4960 | 7.5  | 0.0690 | 2.7 | 0.36 | 429.8  | 11.2 | 409.0  | 25.3 | 292.8  | 160.0 | 429.8  | 11.2 | 146.8 |
| JT11-74  | 79   | 24100  | 2.1  | 18.4433 | 7.1  | 0.5158 | 7.4  | 0.0690 | 2.0 | 0.27 | 430.1  | 8.2  | 422.3  | 25.5 | 380.2  | 160.0 | 430.1  | 8.2  | 113.1 |
| JT11-23  | 173  | 23216  | 2.0  | 17.7413 | 3.0  | 0.5364 | 4.2  | 0.0690 | 3.0 | 0.70 | 430.2  | 12.3 | 436.0  | 14.9 | 466.8  | 66.2  | 430.2  | 12.3 | 92.2  |
| JT11-27  | 90   | 14846  | 2.5  | 18.5540 | 7.1  | 0.5130 | 7.2  | 0.0690 | 1.4 | 0.20 | 430.3  | 6.0  | 420.5  | 24.9 | 366.7  | 159.6 | 430.3  | 6.0  | 117.3 |
| JT11-35  | 72   | 9099   | 2.8  | 18.3943 | 14.3 | 0.5182 | 14.4 | 0.0691 | 1.9 | 0.13 | 430.9  | 8.1  | 424.0  | 50.1 | 386.2  | 322.9 | 430.9  | 8.1  | 111.6 |
| JT11-87  | 84   | 12932  | 2.9  | 18.5869 | 7.5  | 0.5136 | 7.6  | 0.0692 | 1.4 | 0.18 | 431.6  | 5.7  | 420.9  | 26.2 | 362.7  | 168.8 | 431.6  | 5.7  | 119.0 |
| JT11-70  | 160  | 56099  | 2.4  | 18.2040 | 3.1  | 0.5259 | 3.5  | 0.0694 | 1.6 | 0.45 | 432.8  | 6.5  | 429.1  | 12.2 | 409.5  | 69.6  | 432.8  | 6.5  | 105.7 |
| JT11-89  | 103  | 26001  | 1.8  | 18.9445 | 4.0  | 0.5078 | 4.9  | 0.0698 | 2.8 | 0.57 | 434.8  | 11.7 | 417.0  | 16.8 | 319.6  | 91.9  | 434.8  | 11.7 | 136.0 |
| JT11-5   | 130  | 35262  | 1.9  | 17.5826 | 2.9  | 0.5494 | 3.1  | 0.0701 | 0.9 | 0.29 | 436.5  | 3.8  | 444.6  | 11.1 | 486.7  | 64.9  | 436.5  | 3.8  | 89.7  |
| JT11-15  | 215  | 49310  | 1.8  | 18.1999 | 2.2  | 0.5317 | 3.3  | 0.0702 | 2.5 | 0.75 | 437.2  | 10.5 | 432.9  | 11.8 | 410.0  | 49.8  | 437.2  | 10.5 | 106.7 |
| JT11-66  | 92   | 16860  | 2.9  | 17.8149 | 3.6  | 0.5448 | 3.9  | 0.0704 | 1.5 | 0.38 | 438.5  | 6.3  | 441.6  | 14.1 | 457.6  | 80.7  | 438.5  | 6.3  | 95.8  |
| JT11-93  | 147  | 38963  | 1.8  | 17.7892 | 5.3  | 0.5464 | 5.6  | 0.0705 | 1.6 | 0.30 | 439.1  | 7.0  | 442.6  | 19.9 | 460.8  | 117.8 | 439.1  | 7.0  | 95.3  |
| JT11-19  | 137  | 25780  | 3.7  | 17.7971 | 3.8  | 0.5517 | 4.3  | 0.0712 | 1.9 | 0.44 | 443.5  | 8.1  | 446.1  | 15.4 | 459.8  | 84.7  | 443.5  | 8.1  | 96.4  |
| JT11-22  | 401  | 19419  | 2.3  | 18.1735 | 1.4  | 0.5433 | 1.9  | 0.0716 | 1.2 | 0.66 | 445.8  | 5.3  | 440.6  | 6.7  | 413.2  | 31.6  | 445.8  | 5.3  | 107.9 |
| JT11-4   | 126  | 29536  | 1.9  | 18.7626 | 5.8  | 0.5267 | 6.2  | 0.0717 | 2.2 | 0.36 | 446.2  | 9.6  | 429.6  | 21.8 | 341.5  | 131.8 | 446.2  | 9.6  | 130.7 |
| JT11-26  | 210  | 60876  | 3.2  | 17.9182 | 3.2  | 0.5516 | 3.5  | 0.0717 | 1.3 | 0.36 | 446.3  | 5.4  | 446.0  | 12.5 | 444.8  | 71.8  | 446.3  | 5.4  | 100.3 |
| JT11-37  | 367  | 78425  | 4.3  | 17.9049 | 1.8  | 0.5547 | 2.3  | 0.0720 | 1.4 | 0.63 | 448.4  | 6.2  | 448.0  | 8.3  | 446.4  | 39.4  | 448.4  | 6.2  | 100.4 |
| JT11-80  | 199  | 32640  | 2.2  | 17.7780 | 3.4  | 0.5718 | 3.7  | 0.0737 | 1.3 | 0.36 | 458.6  | 5.9  | 459.2  | 13.6 | 462.2  | 75.8  | 458.6  | 5.9  | 99.2  |
| JT11-30  | 67   | 13399  | 4.2  | 19.6965 | 8.5  | 0.5288 | 8.8  | 0.0755 | 2.0 | 0.23 | 469.5  | 9.2  | 431.0  | 30.8 | 230.4  | 197.0 | 469.5  | 9.2  | 203.8 |
| JT11-58  | 254  | 34237  | 2.1  | 18.0737 | 2.1  | 0.5971 | 2.7  | 0.0783 | 1.7 | 0.64 | 485.8  | 8.1  | 475.4  | 10.3 | 425.5  | 46.8  | 485.8  | 8.1  | 114.2 |
| JT11-56  | 115  | 52272  | 0.8  | 15.8926 | 1.7  | 0.9956 | 2.7  | 0.1148 | 2.1 | 0.77 | 700.3  | 14.1 | 701.6  | 13.9 | 705.6  | 36.9  | 700.3  | 14.1 | 99.2  |
| JT11-10  | 85   | 42635  | 2.5  | 12.7515 | 1.6  | 2.1298 | 2.1  | 0.1970 | 1.4 | 0.66 | 1159.0 | 14.8 | 1158.5 | 14.7 | 1157.6 | 31.7  | 1157.6 | 31.7 | 100.1 |
| JT11-67  | 138  | 100850 | 17.7 | 12.7206 | 1.4  | 2.1550 | 3.7  | 0.1988 | 3.4 | 0.93 | 1169.0 | 36.4 | 1166.7 | 25.4 | 1162.4 | 26.9  | 1162.4 | 26.9 | 100.6 |
| JT11-90  | 148  | 60095  | 2.0  | 12.7025 | 1.4  | 2.0908 | 1.6  | 0.1926 | 0.9 | 0.55 | 1135.6 | 9.5  | 1145.8 | 11.3 | 1165.2 | 27.0  | 1165.2 | 27.0 | 97.5  |
| JT11-57  | 64   | 37731  | 2.   |         |      |        |      |        |     |      |        |      |        |      |        |       |        |      |       |

15. U decay constants and composition as follows:  $^{238}\text{U} = 9.8485 \times 10^{-10}$ ,  $^{235}\text{U} = 1.55125 \times 10^{-10}$ ,  $^{238}\text{U}/^{235}\text{U} = 137.88$ .
16. Weighted mean and concordia plots determined with Isoplot (Ludwig, 2008).
17. Analyses in red are not used for age interpretation.

Gehrels, G.E., and Pecha, M., in review, Detrital Zircon U-Pb geochronology and Hf Isotope Geochemistry of Paleozoic and Triassic Passive Margin Strata of Western North America: Geosphere.

Gehrels, G.E., Valencia, V.A., Ruiz, J., 2008. Enhanced precision, accuracy, efficiency, and spatial resolution of U-Pb ages by laser ablation-multicollector-inductively coupled plasma mass spectrometry: *Geochemistry Geophysics Geosystems* 9 (Q03017), 13.

Ludwig, K.R., 2008, Isoplot 3.6: Berkeley Geochronology Center Special Publication No. 4, 77 p.

Stacey, J.S., and Kramers, J.D., 1975, Approximation of terrestrial lead isotopic evolution by a two-stage model: *Earth and Planetary Science Letters*, v. 26, p. 207-221.
