# Supplementary material
Source: publisher figshare collection journal article supplement (https://gsapubs.figshare.com/ndownloader/files/22411650)
Supplement: Supplementary file 1 [file 22411650 › Supp Item I - Dike Ar-Ar raw data.pdf]

**Data Repository Item I -  $^{40}\text{Ar}/^{39}\text{Ar}$  geochronologic data from mafic dikes along the Denali fault**

**28CHED WR#L1**

Weighted average of J from standards =  $8.314\text{e-}05 \pm 2.212\text{e-}07$

| Laser Power | Cumulative | $^{40}\text{Ar}/^{39}\text{Ar}$ | +        | $^{37}\text{Ar}/^{39}\text{Ar}$ | +       | $^{36}\text{Ar}/^{39}\text{Ar}$ | +       | % Atm.           | +       | Ca/K    | +       | Cl/K    | +       | 40*/39K  | +        | Age   | +    |
|-------------|------------|---------------------------------|----------|---------------------------------|---------|---------------------------------|---------|------------------|---------|---------|---------|---------|---------|----------|----------|-------|------|
| (mW)        | 39Ar       | meas.                           |          | meas.                           |         | meas.                           |         | $^{40}\text{Ar}$ |         |         |         |         |         |          |          | (Ma)  | (Ma) |
| 500         | 0.0272     | 410.8928                        | 14.22523 | 0.62085                         | 0.05163 | 0.62041                         | 0.04946 | 44.6084          | 3.20652 | 1.13968 | 0.09481 | 0.00482 | 0.00517 | 227.6835 | 15.36927 | 33.79 | 2.26 |
| 900         | 0.0698     | 214.6538                        | 6.34555  | 0.85644                         | 0.04143 | 0.2106                          | 0.02554 | 28.96366         | 3.41014 | 1.5724  | 0.07611 | 0.00061 | 0.00263 | 152.5534 | 8.60408  | 22.71 | 1.27 |
| 1200        | 0.1229     | 289.4501                        | 5.94252  | 1.16295                         | 0.05064 | 0.3107                          | 0.02219 | 31.68945         | 2.17057 | 2.1356  | 0.09307 | 0.00164 | 0.00288 | 197.8672 | 7.49267  | 29.4  | 1.1  |
| 1500        | 0.2056     | 354.2067                        | 6.7758   | 1.84653                         | 0.05068 | 0.34419                         | 0.01603 | 28.67378         | 1.22061 | 3.39255 | 0.09324 | 0.00681 | 0.00293 | 252.951  | 6.50299  | 37.51 | 0.95 |
| 2000        | 0.3016     | 375.4322                        | 5.17975  | 5.0449                          | 0.08096 | 0.35212                         | 0.01355 | 27.60627         | 0.99851 | 9.2898  | 0.14962 | 0.00046 | 0.00123 | 272.7397 | 5.34934  | 40.41 | 0.78 |
| 2500        | 0.4435     | 292.0866                        | 2.2828   | 2.25118                         | 0.02801 | 0.12068                         | 0.00804 | 12.14689         | 0.80814 | 4.13718 | 0.05156 | 0.00173 | 0.0009  | 256.9897 | 3.11352  | 38.1  | 0.46 |
| 3000        | 0.5202     | 245.7653                        | 3.06931  | 0.28842                         | 0.01666 | 0.04614                         | 0.01392 | 5.53851          | 1.67249 | 0.52931 | 0.03058 | 0.00134 | 0.00161 | 232.1728 | 5.03256  | 34.45 | 0.74 |
| 5000        | 0.7622     | 258.3348                        | 3.03998  | 0.90106                         | 0.01328 | 0.09175                         | 0.00417 | 10.46702         | 0.46085 | 1.65437 | 0.02439 | 0.00864 | 0.0006  | 231.4155 | 2.97787  | 34.34 | 0.44 |
| 9000        | 1          | 283.4991                        | 1.85492  | 0.83508                         | 0.01133 | 0.14836                         | 0.00671 | 15.44144         | 0.69274 | 1.53316 | 0.02082 | 0.00843 | 0.00099 | 239.8391 | 2.52055  | 35.58 | 0.37 |
| Integrated  |            | 291.2831                        | 1.3218   | 1.51134                         | 0.01011 | 0.18281                         | 0.00365 | 18.50469         | 0.36121 | 2.77606 | 0.01859 | 0.0053  | 0.00049 | 237.6115 | 1.51073  | 35.25 | 0.24 |

**02PETERS WR#L1**

Weighted average of J from standards =  $3.476\text{e-}03 \pm 1.357\text{e-}05$

| Laser Power | Cumulative | $^{40}\text{Ar}/^{39}\text{Ar}$ | +       | $^{37}\text{Ar}/^{39}\text{Ar}$ | +       | $^{36}\text{Ar}/^{39}\text{Ar}$ | +       | % Atm.           | +       | Ca/K     | +       | Cl/K    | +       | 40*/39K  | +       | Age   | +     |
|-------------|------------|---------------------------------|---------|---------------------------------|---------|---------------------------------|---------|------------------|---------|----------|---------|---------|---------|----------|---------|-------|-------|
| (mW)        | 39Ar       | meas.                           |         | meas.                           |         | meas.                           |         | $^{40}\text{Ar}$ |         |          |         |         |         |          |         | (Ma)  | (Ma)  |
| 500         | 0.0109     | 66.25863                        | 0.99175 | 2.47186                         | 0.05785 | 0.1851                          | 0.0086  | 82.27962         | 3.6672  | 4.54345  | 0.10652 | 0.01313 | 0.00173 | 11.75655 | 2.44433 | 72.17 | 14.71 |
| 1000        | 0.0285     | 22.30646                        | 0.17054 | 3.41146                         | 0.03404 | 0.05724                         | 0.00426 | 74.66442         | 5.62743 | 6.27468  | 0.06276 | 0.00553 | 0.00109 | 5.65759  | 1.25814 | 35.09 | 7.73  |
| 1500        | 0.0543     | 14.67027                        | 0.10506 | 4.05196                         | 0.04335 | 0.03794                         | 0.00277 | 74.28641         | 5.58551 | 7.45613  | 0.08001 | 0.00453 | 0.00083 | 3.77544  | 0.82139 | 23.49 | 5.08  |
| 2000        | 0.0853     | 17.90036                        | 0.16851 | 4.29136                         | 0.04567 | 0.04845                         | 0.00246 | 78.14183         | 4.0195  | 7.898    | 0.08431 | 0.00461 | 0.00066 | 3.91809  | 0.72246 | 24.38 | 4.46  |
| 2500        | 0.1248     | 22.29058                        | 0.19814 | 6.82557                         | 0.07285 | 0.06117                         | 0.00199 | 78.67394         | 2.58524 | 12.58464 | 0.13497 | 0.00338 | 0.00045 | 4.7704   | 0.58214 | 29.64 | 3.59  |
| 3000        | 0.1851     | 21.04376                        | 0.13856 | 8.50453                         | 0.06865 | 0.05411                         | 0.00162 | 72.75731         | 2.24865 | 15.69893 | 0.12748 | 0.00245 | 0.00034 | 5.75944  | 0.4792  | 35.72 | 2.94  |
| 5000        | 0.5577     | 8.95547                         | 0.06838 | 3.65329                         | 0.02608 | 0.0105                          | 0.00032 | 31.37928         | 1.04569 | 6.72063  | 0.0481  | 0.00436 | 0.00015 | 6.14082  | 0.10854 | 38.06 | 0.67  |
| 9000        | 1          | 8.00523                         | 0.04666 | 6.13717                         | 0.03329 | 0.00788                         | 0.00015 | 22.85092         | 0.54554 | 11.30987 | 0.06161 | 0.0195  | 0.00016 | 6.17993  | 0.06041 | 38.3  | 0.37  |
| Integrated  |            | 11.07324                        | 0.03938 | 5.18408                         | 0.0192  | 0.01858                         | 0.00024 | 45.83776         | 0.64523 | 9.54703  | 0.03549 | 0.01103 | 0.0001  | 6.00347  | 0.07646 | 37.22 | 0.49  |

**24PETERS WR#L1**

Weighted average of J from standards =  $3.476\text{e-}03 \pm 1.357\text{e-}05$

| Laser Power | Cumulative | $^{40}\text{Ar}/^{39}\text{Ar}$ | +       | $^{37}\text{Ar}/^{39}\text{Ar}$ | +       | $^{36}\text{Ar}/^{39}\text{Ar}$ | +       | % Atm.           | +       | Ca/K    | +       | Cl/K    | +       | 40*/39K | +       | Age   | +    |
|-------------|------------|---------------------------------|---------|---------------------------------|---------|---------------------------------|---------|------------------|---------|---------|---------|---------|---------|---------|---------|-------|------|
| (mW)        | 39Ar       | meas.                           |         | meas.                           |         | meas.                           |         | $^{40}\text{Ar}$ |         |         |         |         |         |         |         | (Ma)  | (Ma) |
| 500         | 0.0096     | 16.91891                        | 0.23717 | 3.06255                         | 0.06645 | 0.04259                         | 0.00517 | 73.0262          | 9.00606 | 5.63154 | 0.12245 | 0.01162 | 0.0011  | 4.56555 | 1.5265  | 28.37 | 9.41 |
| 1000        | 0.0333     | 8.99714                         | 0.07612 | 3.52332                         | 0.03226 | 0.02315                         | 0.00169 | 73.0383          | 5.55206 | 6.48093 | 0.05949 | 0.01042 | 0.00059 | 2.42383 | 0.50001 | 15.12 | 3.11 |
| 1500        | 0.0687     | 8.29669                         | 0.04785 | 3.07534                         | 0.01944 | 0.02252                         | 0.00158 | 77.42984         | 5.64508 | 5.65511 | 0.03583 | 0.00863 | 0.00046 | 1.86995 | 0.46805 | 11.67 | 2.91 |
| 2000        | 0.111      | 7.36133                         | 0.02886 | 2.97773                         | 0.0229  | 0.0136                          | 0.00099 | 51.48037         | 3.97515 | 5.47524 | 0.04219 | 0.00444 | 0.00022 | 3.56481 | 0.29283 | 22.19 | 1.81 |
| 2500        | 0.1671     | 7.21875                         | 0.0445  | 4.00353                         | 0.03305 | 0.00875                         | 0.00105 | 31.37599         | 4.33387 | 7.36676 | 0.06099 | 0.00196 | 0.0002  | 4.94746 | 0.3145  | 30.73 | 1.94 |
| 3000        | 0.2314     | 6.32594                         | 0.03314 | 2.69549                         | 0.01762 | 0.00369                         | 0.00093 | 13.78161         | 4.37909 | 4.95529 | 0.03245 | 0.00104 | 0.00014 | 5.43892 | 0.27794 | 33.75 | 1.71 |
| 5000        | 0.4455     | 5.92997                         | 0.03515 | 1.00778                         | 0.00723 | 0.00116                         | 0.00019 | 4.41356          | 0.95435 | 1.85046 | 0.01329 | 0.00216 | 0.00007 | 5.6439  | 0.06594 | 35.01 | 0.41 |
| 9000        | 1          | 6.39137                         | 0.04063 | 2.3257                          | 0.01384 | 0.00324                         | 0.0001  | 12.03287         | 0.46838 | 4.27436 | 0.02547 | 0.00545 | 0.00008 | 5.60543 | 0.04858 | 34.77 | 0.3  |
| Integrated  |            | 6.60628                         | 0.02462 | 2.25159                         | 0.0083  | 0.0051                          | 0.00014 | 20.1148          | 0.6492  | 4.13793 | 0.01529 | 0.00451 | 0.00005 | 5.26212 | 0.0481  | 32.66 | 0.32 |

**25PETER WR#L1**

Weighted average of J from standards = 3.476e-03 +/- 1.357e-05

| Laser Power | Cumulative | <sup>40</sup> Ar/ <sup>39</sup> Ar | ±/-     | <sup>37</sup> Ar/ <sup>39</sup> Ar | ±/-     | <sup>36</sup> Ar/ <sup>39</sup> Ar | ±/-     | % Atm.           | ±/-     | Ca/K     | ±/-     | Cl/K    | ±/-     | 40*/39K | ±/-     | Age   | ±/-   |
|-------------|------------|------------------------------------|---------|------------------------------------|---------|------------------------------------|---------|------------------|---------|----------|---------|---------|---------|---------|---------|-------|-------|
| (mW)        | 39Ar       | meas.                              |         | meas.                              |         | meas.                              |         | <sup>40</sup> Ar |         |          |         |         |         |         |         | (Ma)  | (Ma)  |
| 500         | 0.0084     | 288.4988                           | 6.2521  | 7.0162                             | 0.16248 | 0.94731                            | 0.02174 | 96.83885         | 0.78182 | 12.93787 | 0.3011  | 0.00788 | 0.00239 | 9.16435 | 2.27977 | 56.51 | 13.84 |
| 1000        | 0.0234     | 84.42927                           | 1.11839 | 7.55935                            | 0.10357 | 0.27479                            | 0.00721 | 95.46939         | 2.19221 | 13.94482 | 0.19209 | 0.00851 | 0.00123 | 3.84435 | 1.86145 | 23.92 | 11.51 |
| 1500        | 0.0454     | 82.71847                           | 1.0012  | 8.43474                            | 0.10617 | 0.27352                            | 0.00497 | 96.90347         | 1.36783 | 15.56932 | 0.19714 | 0.0077  | 0.00091 | 2.57583 | 1.13938 | 16.06 | 7.07  |
| 2000        | 0.0722     | 163.9518                           | 1.38463 | 12.54308                           | 0.1047  | 0.53819                            | 0.00755 | 96.38704         | 1.12697 | 23.22051 | 0.19556 | 0.00582 | 0.00112 | 5.97538 | 1.86704 | 37.04 | 11.46 |
| 2500        | 0.1106     | 54.25026                           | 0.41507 | 9.64921                            | 0.07739 | 0.1702                             | 0.0025  | 91.29328         | 1.17836 | 17.82644 | 0.14396 | 0.00432 | 0.00046 | 4.75324 | 0.64511 | 29.53 | 3.98  |
| 3000        | 0.184      | 49.13437                           | 0.3001  | 5.12231                            | 0.0339  | 0.15375                            | 0.00236 | 91.66012         | 1.32947 | 9.43286  | 0.06266 | 0.00339 | 0.00028 | 4.11015 | 0.65694 | 25.56 | 4.06  |
| 4000        | 0.2645     | 28.03589                           | 0.09593 | 3.2806                             | 0.01137 | 0.0815                             | 0.00101 | 85.02879         | 1.04604 | 6.03344  | 0.02096 | 0.00279 | 0.00022 | 4.20261 | 0.29507 | 26.13 | 1.82  |
| 5000        | 0.3588     | 18.14709                           | 0.07633 | 2.92144                            | 0.01481 | 0.04708                            | 0.00111 | 75.4625          | 1.79554 | 5.37152  | 0.02728 | 0.006   | 0.00033 | 4.45476 | 0.327   | 27.69 | 2.02  |
| 6000        | 0.5783     | 13.24007                           | 0.04185 | 2.93224                            | 0.01147 | 0.03025                            | 0.00036 | 65.83975         | 0.80452 | 5.39142  | 0.02113 | 0.00895 | 0.00014 | 4.52208 | 0.1088  | 28.1  | 0.67  |
| 9000        | 1          | 11.49293                           | 0.04656 | 3.9567                             | 0.01621 | 0.02504                            | 0.00036 | 61.70519         | 0.92092 | 7.28035  | 0.02992 | 0.00833 | 0.00009 | 4.40215 | 0.10868 | 27.36 | 0.67  |
| Integrated  |            | 27.35158                           | 0.0516  | 4.29549                            | 0.00888 | 0.07867                            | 0.00038 | 83.78784         | 0.38675 | 7.90562  | 0.0164  | 0.0072  | 0.00008 | 4.44296 | 0.1068  | 27.62 | 0.67  |

**30PETER WR#L1**

Weighted average of J from standards = 3.476e-03 +/- 1.357e-05

| Laser Power | Cumulative | <sup>40</sup> Ar/ <sup>39</sup> Ar | ±/-      | <sup>37</sup> Ar/ <sup>39</sup> Ar | ±/-     | <sup>36</sup> Ar/ <sup>39</sup> Ar | ±/-     | % Atm.           | ±/-     | Ca/K     | ±/-     | Cl/K    | ±/-     | 40*/39K | ±/-     | Age   | ±/-   |
|-------------|------------|------------------------------------|----------|------------------------------------|---------|------------------------------------|---------|------------------|---------|----------|---------|---------|---------|---------|---------|-------|-------|
| (mW)        | 39Ar       | meas.                              |          | meas.                              |         | meas.                              |         | <sup>40</sup> Ar |         |          |         |         |         |         |         | (Ma)  | (Ma)  |
| 500         | 0.0049     | 270.3523                           | 19.42516 | 5.59335                            | 0.41009 | 0.89369                            | 0.06965 | 97.52246         | 2.96044 | 10.30373 | 0.75844 | 0.03208 | 0.00647 | 6.72392 | 8.04999 | 41.63 | 49.27 |
| 1000        | 0.015      | 114.7303                           | 4.10741  | 6.6565                             | 0.24183 | 0.3754                             | 0.01817 | 96.2342          | 3.15548 | 12.27146 | 0.44792 | 0.02768 | 0.00306 | 4.3398  | 3.64012 | 26.98 | 22.46 |
| 1500        | 0.0341     | 96.59158                           | 1.58828  | 4.77629                            | 0.08271 | 0.3273                             | 0.00962 | 99.75397         | 2.45591 | 8.7935   | 0.15278 | 0.038   | 0.00141 | 0.23837 | 2.37954 | 1.49  | 14.89 |
| 2000        | 0.0649     | 58.5623                            | 0.67908  | 4.09618                            | 0.04872 | 0.18566                            | 0.00487 | 93.15133         | 2.21717 | 7.53774  | 0.08991 | 0.01944 | 0.001   | 4.02034 | 1.30284 | 25.01 | 8.05  |
| 2500        | 0.1127     | 35.34725                           | 0.28351  | 4.76185                            | 0.03975 | 0.10638                            | 0.0032  | 87.89443         | 2.58789 | 8.76682  | 0.07343 | 0.00909 | 0.00074 | 4.28983 | 0.91829 | 26.67 | 5.67  |
| 3000        | 0.2164     | 20.2717                            | 0.09263  | 4.60175                            | 0.02613 | 0.04945                            | 0.00088 | 70.31425         | 1.2606  | 8.47111  | 0.04826 | 0.00646 | 0.00024 | 6.02861 | 0.25865 | 37.37 | 1.59  |
| 4000        | 0.4067     | 9.79406                            | 0.03378  | 3.55062                            | 0.01622 | 0.01483                            | 0.0006  | 41.88965         | 1.82637 | 6.53127  | 0.0299  | 0.00365 | 0.00014 | 5.68841 | 0.18032 | 35.28 | 1.11  |
| 5000        | 0.5881     | 10.5143                            | 0.04044  | 2.69546                            | 0.01168 | 0.01673                            | 0.00074 | 45.03269         | 2.09329 | 4.95523  | 0.02151 | 0.0056  | 0.00019 | 5.77412 | 0.22159 | 35.81 | 1.36  |
| 6000        | 0.7335     | 9.5692                             | 0.04372  | 2.90141                            | 0.01522 | 0.01431                            | 0.00054 | 41.83438         | 1.67056 | 5.33462  | 0.02803 | 0.00926 | 0.00018 | 5.56014 | 0.16234 | 34.49 | 1     |
| 9000        | 1          | 9.32482                            | 0.03558  | 8.5814                             | 0.0348  | 0.0144                             | 0.00031 | 38.16969         | 0.96209 | 15.8417  | 0.06463 | 0.02972 | 0.0002  | 5.78235 | 0.09368 | 35.86 | 0.58  |
| Integrated  |            | 17.57558                           | 0.02997  | 4.89398                            | 0.01037 | 0.04215                            | 0.00039 | 68.67924         | 0.64937 | 9.01092  | 0.01915 | 0.01384 | 0.0001  | 5.51459 | 0.11495 | 34.21 | 0.72  |

**55NEN WR#L1**

Weighted average of J from standards = 8.095e-05 +/- 2.153e-07

| Laser Power | Cumulative | <sup>40</sup> Ar/ <sup>39</sup> Ar | ±/-      | <sup>37</sup> Ar/ <sup>39</sup> Ar | ±/-     | <sup>36</sup> Ar/ <sup>39</sup> Ar | ±/-     | % Atm.           | ±/-     | Ca/K    | ±/-     | Cl/K    | ±/-     | 40*/39K  | ±/-      | Age   | ±/-  |
|-------------|------------|------------------------------------|----------|------------------------------------|---------|------------------------------------|---------|------------------|---------|---------|---------|---------|---------|----------|----------|-------|------|
| (mW)        | 39Ar       | meas.                              |          | meas.                              |         | meas.                              |         | <sup>40</sup> Ar |         |         |         |         |         |          |          | (Ma)  | (Ma) |
| 500         | 0.0184     | 376.8345                           | 12.71204 | 0.15877                            | 0.02858 | 0.58268                            | 0.03956 | 45.69215         | 2.69736 | 0.29136 | 0.05245 | 0.0127  | 0.00488 | 204.6575 | 12.30809 | 29.61 | 1.77 |
| 900         | 0.0514     | 123.7665                           | 3.259    | 0.28384                            | 0.02287 | 0.09233                            | 0.01407 | 22.03005         | 3.31086 | 0.5209  | 0.04199 | 0.01088 | 0.00288 | 96.49689 | 4.82599  | 14.02 | 0.7  |
| 1200        | 0.0959     | 166.4229                           | 2.49124  | 0.36275                            | 0.02082 | 0.04791                            | 0.00837 | 8.49082          | 1.48086 | 0.66577 | 0.03821 | 0.00259 | 0.00232 | 152.304  | 3.36203  | 22.08 | 0.48 |
| 1500        | 0.1367     | 169.4081                           | 3.37347  | 0.28782                            | 0.02055 | 0.02972                            | 0.01065 | 5.17071          | 1.85529 | 0.52822 | 0.03772 | 0.00058 | 0.00191 | 160.653  | 4.48742  | 23.28 | 0.65 |
| 2000        | 0.2205     | 174.8697                           | 2.39948  | 0.14049                            | 0.00988 | 0.02544                            | 0.00553 | 4.29375          | 0.93282 | 0.25781 | 0.01813 | 0.00322 | 0.00095 | 167.3494 | 2.81881  | 24.25 | 0.41 |
| 2500        | 0.3434     | 174.539                            | 1.95897  | 0.05247                            | 0.00684 | 0.01911                            | 0.00398 | 3.23409          | 0.6724  | 0.09627 | 0.01254 | 0.00139 | 0.0007  | 168.8717 | 2.2315   | 24.47 | 0.32 |

|            |        |          |         |         |         |         |         |         |         |         |         |         |         |          |         |       |      |
|------------|--------|----------|---------|---------|---------|---------|---------|---------|---------|---------|---------|---------|---------|----------|---------|-------|------|
| 3000       | 0.5366 | 173.6655 | 1.06823 | 0.02558 | 0.00247 | 0.01626 | 0.00254 | 2.76537 | 0.43224 | 0.04693 | 0.00454 | 0.0017  | 0.00041 | 168.8371 | 1.28334 | 24.46 | 0.18 |
| 5000       | 0.8788 | 179.2266 | 1.22336 | 0.06286 | 0.00312 | 0.01863 | 0.00219 | 3.06886 | 0.36066 | 0.11534 | 0.00572 | 0.00243 | 0.00025 | 173.7053 | 1.35239 | 25.16 | 0.19 |
| 9000       | 1      | 239.5113 | 2.90751 | 0.37988 | 0.01281 | 0.08984 | 0.00476 | 11.0724 | 0.5725  | 0.69722 | 0.02352 | 0.00421 | 0.00061 | 213.0224 | 2.9352  | 30.81 | 0.42 |
| Integrated |        | 185.3479 | 0.70567 | 0.13088 | 0.0027  | 0.04199 | 0.00159 | 6.68937 | 0.25232 | 0.24017 | 0.00495 | 0.00284 | 0.00026 | 172.9376 | 0.80926 | 25.05 | 0.13 |

#### 02BAL WR#L1

Weighted average of J from standards = 4.081e-03 +/- 1.295e-05

| Laser Power | Cumulative | <sup>40</sup> Ar/ <sup>39</sup> Ar | +/-     | <sup>37</sup> Ar/ <sup>39</sup> Ar | +/-     | <sup>36</sup> Ar/ <sup>39</sup> Ar | +/-     | % Atm.           | +/-     | Ca/K    | +/-     | Cl/K    | +/-     | 40*/39K | +/-     | Age   | +/-  |
|-------------|------------|------------------------------------|---------|------------------------------------|---------|------------------------------------|---------|------------------|---------|---------|---------|---------|---------|---------|---------|-------|------|
| (mW)        | 39Ar       | meas.                              |         | meas.                              |         | meas.                              |         | <sup>40</sup> Ar |         |         |         |         |         |         |         | (Ma)  | (Ma) |
| 300         | 0.0062     | 27.94144                           | 0.26719 | 0.40107                            | 0.02405 | 0.07942                            | 0.00269 | 83.96298         | 2.7768  | 0.73611 | 0.04416 | 0.00198 | 0.00046 | 4.47748 | 0.7789  | 32.63 | 5.63 |
| 600         | 0.0344     | 5.05121                            | 0.03813 | 0.44595                            | 0.00845 | 0.01305                            | 0.00059 | 76.0608          | 3.46309 | 0.81851 | 0.01552 | 0.00202 | 0.00012 | 1.20249 | 0.17463 | 8.82  | 1.28 |
| 900         | 0.0942     | 4.95156                            | 0.03011 | 1.19705                            | 0.01076 | 0.00712                            | 0.00041 | 40.76485         | 2.4848  | 2.19828 | 0.01978 | 0.00252 | 0.0001  | 2.91795 | 0.12442 | 21.33 | 0.9  |
| 1200        | 0.1766     | 4.36311                            | 0.03835 | 1.46179                            | 0.02262 | 0.00284                            | 0.00018 | 16.56675         | 1.18797 | 2.68496 | 0.0416  | 0.00263 | 0.00012 | 3.61927 | 0.06149 | 26.42 | 0.45 |
| 1500        | 0.2607     | 4.17395                            | 0.02653 | 1.41932                            | 0.0133  | 0.00244                            | 0.00022 | 14.55834         | 1.54854 | 2.60688 | 0.02445 | 0.00264 | 0.00004 | 3.54449 | 0.0686  | 25.88 | 0.5  |
| 1750        | 0.3247     | 4.30419                            | 0.0288  | 1.05294                            | 0.00782 | 0.00187                            | 0.00022 | 10.88173         | 1.54749 | 1.93344 | 0.01437 | 0.00279 | 0.00006 | 3.8122  | 0.07141 | 27.82 | 0.52 |
| 2000        | 0.3794     | 4.53176                            | 0.04913 | 0.80073                            | 0.01013 | 0.00223                            | 0.00036 | 13.16745         | 2.38469 | 1.47007 | 0.01862 | 0.00298 | 0.00009 | 3.91148 | 0.11593 | 28.54 | 0.84 |
| 2500        | 0.5086     | 4.40348                            | 0.03194 | 0.38657                            | 0.00443 | 0.00166                            | 0.00014 | 10.52041         | 0.93342 | 0.70949 | 0.00812 | 0.00278 | 0.00004 | 3.91472 | 0.05069 | 28.56 | 0.37 |
| 3000        | 0.6777     | 4.31553                            | 0.0268  | 0.26972                            | 0.00339 | 0.00157                            | 0.00011 | 10.34038         | 0.77225 | 0.49499 | 0.00621 | 0.0027  | 0.00005 | 3.8434  | 0.04158 | 28.05 | 0.3  |
| 4000        | 0.9016     | 4.26624                            | 0.03527 | 0.23979                            | 0.00226 | 0.00114                            | 0.00009 | 7.45558          | 0.646   | 0.44006 | 0.00414 | 0.00282 | 0.00005 | 3.92135 | 0.04342 | 28.61 | 0.31 |
| 5000        | 0.9759     | 4.51318                            | 0.02587 | 0.62751                            | 0.00428 | 0.00146                            | 0.00021 | 8.49889          | 1.37006 | 1.1519  | 0.00785 | 0.00294 | 0.00006 | 4.10427 | 0.06614 | 29.94 | 0.48 |
| 6000        | 0.9863     | 5.68714                            | 0.04206 | 2.88299                            | 0.02292 | 0.0036                             | 0.00167 | 14.58279         | 8.70038 | 5.30069 | 0.04222 | 0.00399 | 0.00029 | 4.84234 | 0.4947  | 35.27 | 3.57 |
| 9000        | 1          | 6.1942                             | 0.04203 | 3.72339                            | 0.03254 | 0.00271                            | 0.00129 | 8.00755          | 6.20453 | 6.84993 | 0.06002 | 0.00397 | 0.00015 | 5.6859  | 0.38562 | 41.34 | 2.77 |
| Integrated  |            | 4.57816                            | 0.012   | 0.71481                            | 0.00269 | 0.00288                            | 0.00007 | 17.43904         | 0.42395 | 1.31225 | 0.00495 | 0.00276 | 0.00002 | 3.75716 | 0.02203 | 27.42 | 0.18 |

#### 07BAL WR#L1

Weighted average of J from standards = 3.587e-03 +/- 1.676e-05

| Laser Power | Cumulative | <sup>40</sup> Ar/ <sup>39</sup> Ar | +/-     | <sup>37</sup> Ar/ <sup>39</sup> Ar | +/-     | <sup>36</sup> Ar/ <sup>39</sup> Ar | +/-     | % Atm.           | +/-     | Ca/K    | +/-     | Cl/K    | +/-     | 40*/39K | +/-     | Age   | +/-  |
|-------------|------------|------------------------------------|---------|------------------------------------|---------|------------------------------------|---------|------------------|---------|---------|---------|---------|---------|---------|---------|-------|------|
| (mW)        | 39Ar       | meas.                              |         | meas.                              |         | meas.                              |         | <sup>40</sup> Ar |         |         |         |         |         |         |         | (Ma)  | (Ma) |
| 500         | 0.0353     | 10.69499                           | 0.16611 | 0.71884                            | 0.01151 | 0.01567                            | 0.00034 | 42.85607         | 0.94492 | 1.31964 | 0.02114 | 0.00563 | 0.00014 | 6.09767 | 0.16201 | 38.99 | 1.02 |
| 1000        | 0.1724     | 4.32394                            | 0.09566 | 1.0469                             | 0.02185 | 0.00132                            | 0.00006 | 7.04896          | 0.37788 | 1.92234 | 0.04015 | 0.00602 | 0.00017 | 3.99451 | 0.09407 | 25.64 | 0.6  |
| 1500        | 0.3069     | 4.33394                            | 0.09079 | 0.67381                            | 0.01258 | 0.00071                            | 0.00004 | 3.56908          | 0.25352 | 1.23694 | 0.02311 | 0.00606 | 0.00016 | 4.15261 | 0.09012 | 26.65 | 0.57 |
| 2000        | 0.4948     | 4.33119                            | 0.0496  | 0.22876                            | 0.00329 | 0.00042                            | 0.00002 | 2.43345          | 0.15411 | 0.4198  | 0.00605 | 0.00616 | 0.00013 | 4.19749 | 0.04901 | 26.93 | 0.31 |
| 2000        | 0.5682     | 4.31464                            | 0.08702 | 0.14515                            | 0.00265 | 0.00041                            | 0.00006 | 2.53398          | 0.38814 | 0.26636 | 0.00486 | 0.00608 | 0.00015 | 4.17679 | 0.08767 | 26.8  | 0.56 |
| 2500        | 0.7084     | 4.33835                            | 0.08945 | 0.10105                            | 0.00199 | 0.00033                            | 0.00004 | 2.09602          | 0.27515 | 0.18543 | 0.00366 | 0.00606 | 0.00016 | 4.21864 | 0.08939 | 27.07 | 0.57 |
| 3000        | 0.8453     | 4.38864                            | 0.09052 | 0.09142                            | 0.00173 | 0.00032                            | 0.00002 | 1.98193          | 0.14981 | 0.16775 | 0.00317 | 0.00603 | 0.00015 | 4.27283 | 0.09    | 27.41 | 0.57 |
| 3500        | 0.9614     | 4.49996                            | 0.09791 | 0.1626                             | 0.00322 | 0.00042                            | 0.00003 | 2.47335          | 0.20756 | 0.29839 | 0.00592 | 0.00615 | 0.00016 | 4.3602  | 0.09728 | 27.97 | 0.62 |
| 4000        | 0.9804     | 4.86638                            | 0.04444 | 0.43242                            | 0.0046  | 0.0012                             | 0.00023 | 6.59462          | 1.41654 | 0.79368 | 0.00845 | 0.0068  | 0.00012 | 4.51911 | 0.08083 | 28.98 | 0.51 |
| 5000        | 0.9938     | 5.14614                            | 0.03731 | 0.8776                             | 0.00617 | 0.00136                            | 0.00025 | 6.46053          | 1.4614  | 1.61127 | 0.01133 | 0.00825 | 0.00013 | 4.78887 | 0.08316 | 30.69 | 0.53 |
| 6000        | 0.9978     | 5.69928                            | 0.07517 | 1.05525                            | 0.01158 | 0.00275                            | 0.00091 | 12.79907         | 4.71998 | 1.93768 | 0.02127 | 0.00851 | 0.00032 | 4.94763 | 0.27715 | 31.7  | 1.76 |
| 9000        | 1          | 6.27563                            | 0.13862 | 1.08445                            | 0.01834 | 0.00434                            | 0.00204 | 19.09135         | 9.63973 | 1.99134 | 0.03371 | 0.0087  | 0.00054 | 5.05739 | 0.61632 | 32.4  | 3.91 |
| Integrated  |            | 4.61319                            | 0.03102 | 0.38535                            | 0.00309 | 0.00114                            | 0.00002 | 6.64184          | 0.12187 | 0.70726 | 0.00567 | 0.00613 | 0.00006 | 4.28023 | 0.0305  | 27.46 | 0.23 |

**28BAL WR#L1**

Weighted average of J from standards = 3.587e-03 +/- 1.676e-05

| Laser Power | Cumulative | <sup>40</sup> Ar/ <sup>39</sup> Ar | +/-     | <sup>37</sup> Ar/ <sup>39</sup> Ar | +/-     | <sup>36</sup> Ar/ <sup>39</sup> Ar | +/-     | % Atm.           | +/-     | Ca/K    | +/-     | Cl/K    | +/-     | 40*/39K  | +/-     | Age   | +/-  |
|-------------|------------|------------------------------------|---------|------------------------------------|---------|------------------------------------|---------|------------------|---------|---------|---------|---------|---------|----------|---------|-------|------|
| (mW)        | 39Ar       | meas.                              |         | meas.                              |         | meas.                              |         | <sup>40</sup> Ar |         |         |         |         |         |          |         | (Ma)  | (Ma) |
| 500         | 0.0179     | 42.21839                           | 0.21262 | 0.28212                            | 0.00218 | 0.10267                            | 0.00086 | 71.85686         | 0.62937 | 0.51775 | 0.004   | 0.00637 | 0.00012 | 11.87559 | 0.29264 | 75.18 | 1.81 |
| 1000        | 0.1231     | 6.63357                            | 0.04409 | 0.1387                             | 0.00097 | 0.00697                            | 0.00009 | 31.02843         | 0.38991 | 0.25453 | 0.00179 | 0.00216 | 0.00004 | 4.55524  | 0.0435  | 29.21 | 0.28 |
| 1500        | 0.2738     | 5.64479                            | 0.04817 | 0.47238                            | 0.00487 | 0.00309                            | 0.00006 | 15.57105         | 0.27977 | 0.86704 | 0.00895 | 0.00242 | 0.00005 | 4.74235  | 0.04516 | 30.4  | 0.29 |
| 2000        | 0.4399     | 5.56845                            | 0.02978 | 1.12718                            | 0.00533 | 0.00229                            | 0.00003 | 10.53683         | 0.17371 | 2.06987 | 0.0098  | 0.00401 | 0.00004 | 4.95911  | 0.02997 | 31.78 | 0.19 |
| 2000        | 0.5321     | 5.28458                            | 0.05227 | 0.96627                            | 0.00817 | 0.0017                             | 0.00005 | 8.02338          | 0.26031 | 1.77418 | 0.015   | 0.00369 | 0.00008 | 4.83658  | 0.05236 | 31    | 0.33 |
| 2500        | 0.6798     | 5.42146                            | 0.03325 | 1.04261                            | 0.00642 | 0.00165                            | 0.00004 | 7.43692          | 0.20508 | 1.91446 | 0.01179 | 0.00485 | 0.00005 | 4.99448  | 0.03372 | 32    | 0.21 |
| 3000        | 0.8389     | 5.43226                            | 0.03417 | 0.76001                            | 0.00465 | 0.00138                            | 0.00003 | 6.38236          | 0.13711 | 1.39526 | 0.00854 | 0.00463 | 0.00005 | 5.06048  | 0.03372 | 32.42 | 0.21 |
| 3500        | 0.9283     | 5.34934                            | 0.06642 | 0.51951                            | 0.00561 | 0.00133                            | 0.00007 | 6.61059          | 0.39666 | 0.95358 | 0.01031 | 0.00363 | 0.00007 | 4.96981  | 0.06794 | 31.84 | 0.43 |
| 4000        | 0.9651     | 5.49952                            | 0.0731  | 0.57087                            | 0.00702 | 0.00179                            | 0.00011 | 8.80498          | 0.57976 | 1.04789 | 0.01289 | 0.00322 | 0.00007 | 4.99022  | 0.077   | 31.97 | 0.49 |
| 5000        | 0.984      | 6.28132                            | 0.06528 | 1.43753                            | 0.01459 | 0.00358                            | 0.00016 | 15.02572         | 0.75316 | 2.64035 | 0.02683 | 0.00472 | 0.00009 | 5.31769  | 0.07655 | 34.05 | 0.49 |
| 6000        | 0.9961     | 6.08254                            | 0.04847 | 1.51582                            | 0.01225 | 0.00345                            | 0.00038 | 14.79192         | 1.83843 | 2.7843  | 0.02252 | 0.00467 | 0.0001  | 5.16306  | 0.12    | 33.07 | 0.76 |
| 9000        | 1          | 6.75051                            | 0.06812 | 1.91394                            | 0.01207 | 0.00569                            | 0.00093 | 22.66099         | 4.08094 | 3.51656 | 0.0222  | 0.00503 | 0.00026 | 5.20487  | 0.28192 | 33.34 | 1.79 |
| Integrated  |            | 6.27902                            | 0.01618 | 0.76257                            | 0.00199 | 0.00435                            | 0.00002 | 19.55742         | 0.1132  | 1.39996 | 0.00366 | 0.00377 | 0.00002 | 5.02983  | 0.01589 | 32.23 | 0.18 |

**10910DIKE WR#L1**

Weighted average of J from standards = 7.892e-05 +/- 1.911e-06

| Laser Power | Cumulative | <sup>40</sup> Ar/ <sup>39</sup> Ar | +/-      | <sup>37</sup> Ar/ <sup>39</sup> Ar | +/-      | <sup>36</sup> Ar/ <sup>39</sup> Ar | +/-     | % Atm.           | +/-      | Ca/K     | +/-      | Cl/K     | +/-     | 40*/39K  | +/-      | Age    | +/-    |
|-------------|------------|------------------------------------|----------|------------------------------------|----------|------------------------------------|---------|------------------|----------|----------|----------|----------|---------|----------|----------|--------|--------|
| (mW)        | 39Ar       | meas.                              |          | meas.                              |          | meas.                              |         | <sup>40</sup> Ar |          |          |          |          |         |          |          | (Ma)   | (Ma)   |
| 500         | 0.0009     | -97.9843                           | 243.9368 | -158.175                           | 511.4436 | 1.31854                            | 4.14135 | -410.812         | 778.295  | -261.066 | 759.3149 | -0.18243 | 0.57675 | -450.375 | 1212.317 | -65.22 | 178.76 |
| 1000        | 0.004      | 143.4066                           | 100.7511 | -202.367                           | 178.8224 | 0.79294                            | 0.81119 | 175.0651         | 122.2716 | -324.885 | 251.1875 | -0.04943 | 0.0961  | -94.1652 | 163.5652 | -13.44 | 23.44  |
| 1500        | 0.0133     | 128.2517                           | 33.97288 | -87.2036                           | 41.5208  | 0.55926                            | 0.28398 | 134.4952         | 56.04872 | -150.724 | 67.60209 | -0.03516 | 0.04218 | -41.664  | 68.4443  | -5.94  | 9.77   |
| 2000        | 0.0575     | 177.713                            | 11.259   | 2.34854                            | 4.78598  | 0.10891                            | 0.03712 | 18.00319         | 6.06812  | 4.3164   | 8.81082  | 0.00594  | 0.00718 | 145.9367 | 14.27007 | 20.64  | 2.01   |
| 2500        | 0.1483     | 184.6621                           | 5.53642  | 0.18225                            | 3.63163  | 0.11282                            | 0.02141 | 18.04836         | 3.38554  | 0.33445  | 6.66526  | 0.00302  | 0.00288 | 151.3288 | 7.76453  | 21.39  | 1.09   |
| 3000        | 0.218      | 183.1691                           | 6.82969  | 3.05472                            | 5.86668  | 0.01932                            | 0.04084 | 2.97975          | 6.58859  | 5.61712  | 10.81115 | 0.00419  | 0.00543 | 178.0665 | 13.85705 | 25.15  | 1.94   |
| 5000        | 0.3577     | 209.7079                           | 4.01666  | 2.9779                             | 2.57962  | 0.05292                            | 0.01692 | 7.34066          | 2.38094  | 5.47554  | 4.75323  | 0.00222  | 0.00291 | 194.6959 | 6.27512  | 27.48  | 0.88   |
| 9000        | 1          | 203.9298                           | 1.0561   | -0.11696                           | 0.56701  | 0.02209                            | 0.00469 | 3.20635          | 0.67976  | -0.21459 | 1.04021  | 0.00241  | 0.00071 | 197.346  | 1.73173  | 27.85  | 0.24   |
| Integrated  |            | 199.3031                           | 1.45805  | -0.76492                           | 0.91437  | 0.04616                            | 0.00638 | 6.87633          | 0.94437  | -1.40276 | 1.67593  | 0.00204  | 0.00101 | 185.4705 | 2.33082  | 26.19  | 0.71   |
