# Supplementary material
Source: publisher figshare collection journal article supplement (https://gsapubs.figshare.com/ndownloader/files/22411650)
Supplement: Supplementary file 1 [file 22411650 › Supp Item J - Dike plots.pdf]

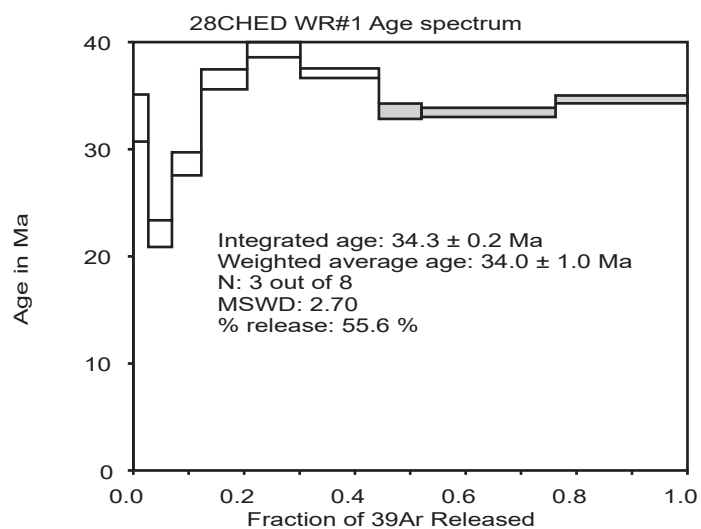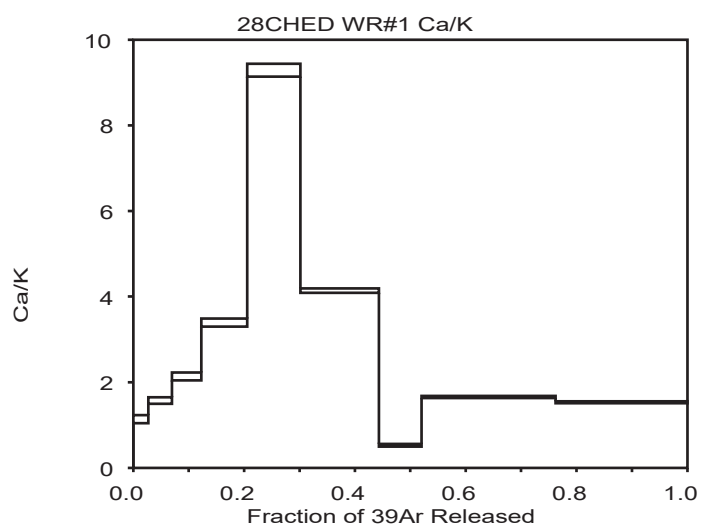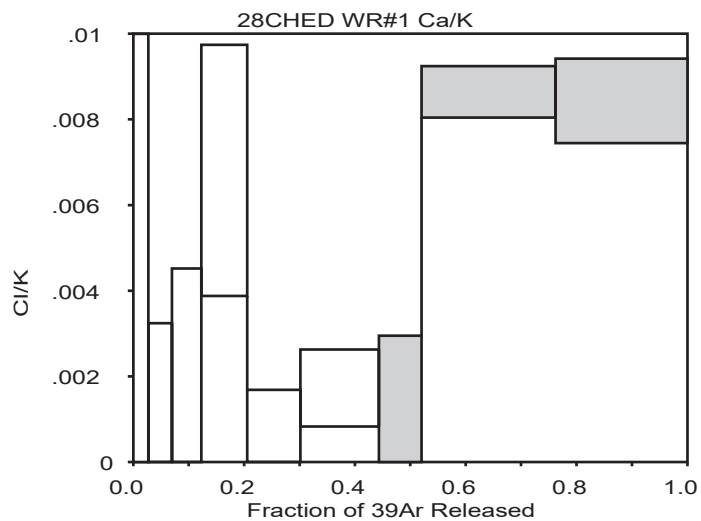

**Data Repository Item J-A.** Plots showing  $^{40}\text{Ar}$ - $^{39}\text{Ar}$  analytical results from mafic dike sample 28CHED WR#1 along the Denali fault in the Alaska Range. MSWD—mean square of weighted deviates.

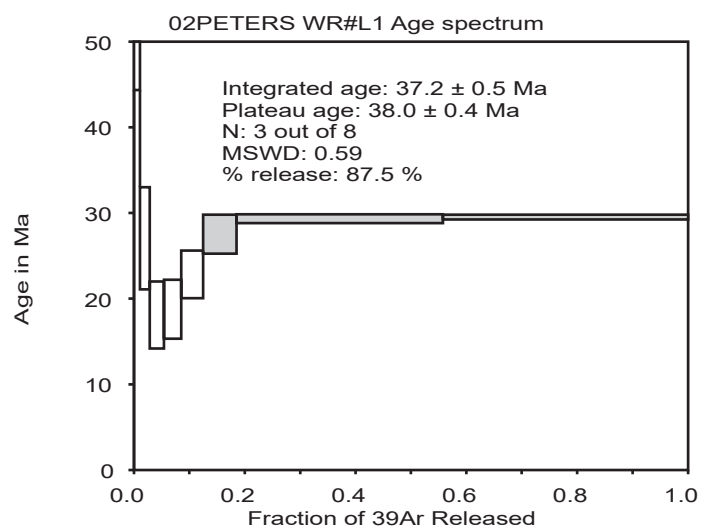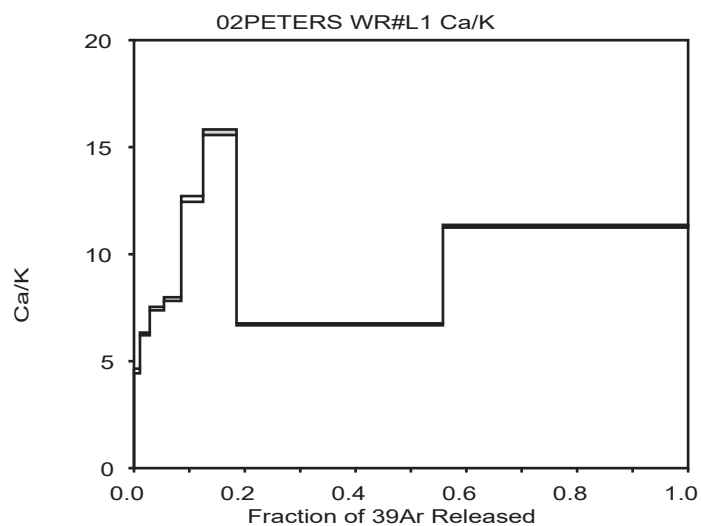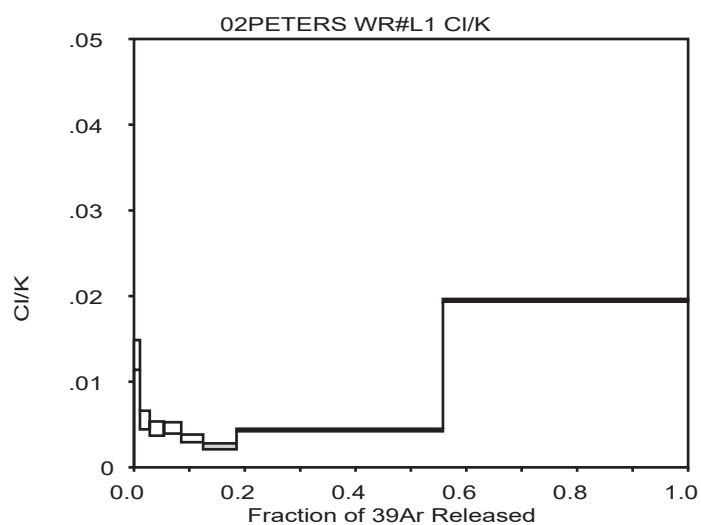

**Data Repository Item J-B.** Plots showing  $^{40}\text{Ar}$ - $^{39}\text{Ar}$  analytical results from mafic dike sample 02PETERS WR#1 along the Denali fault in the Alaska Range. MSWD—mean square of weighted deviates.

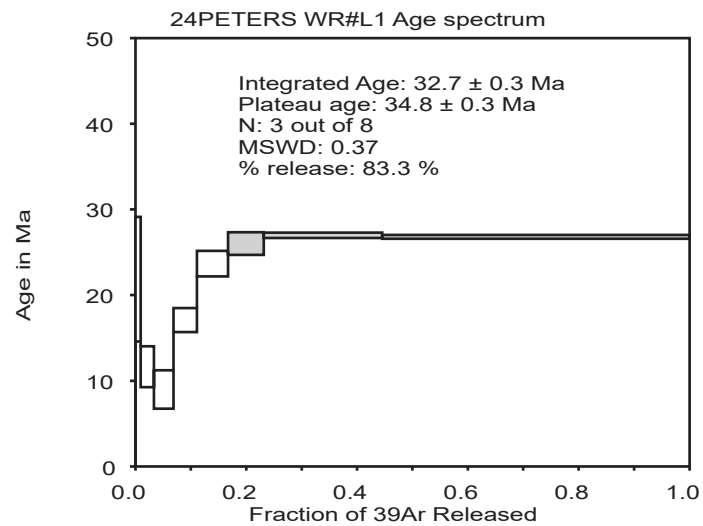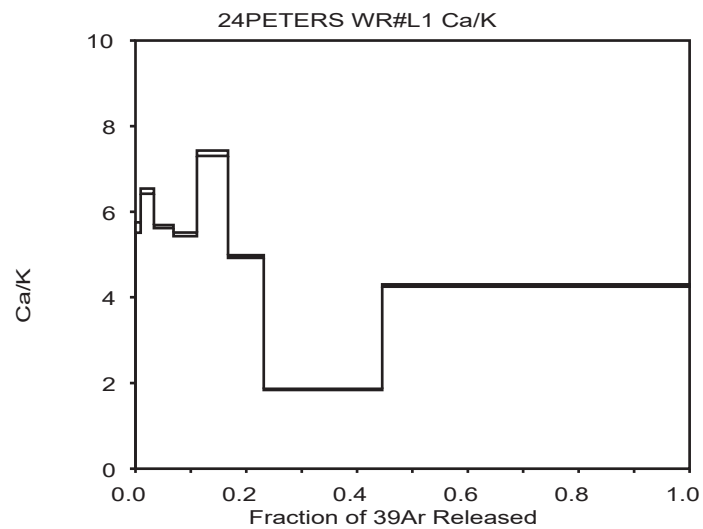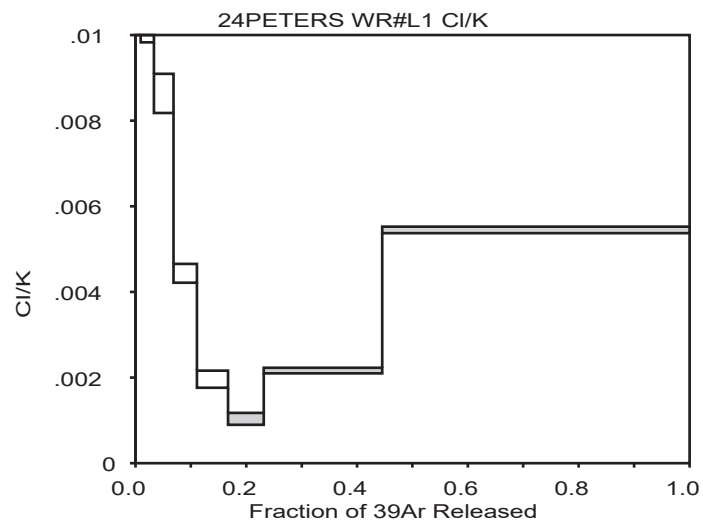

**Data Repository Item J-C.** Plots showing  $^{40}\text{Ar}$ - $^{39}\text{Ar}$  analytical results from mafic dike sample 24PETERS WR#1 along the Denali fault in the Alaska Range. MSWD—mean square of weighted deviates.

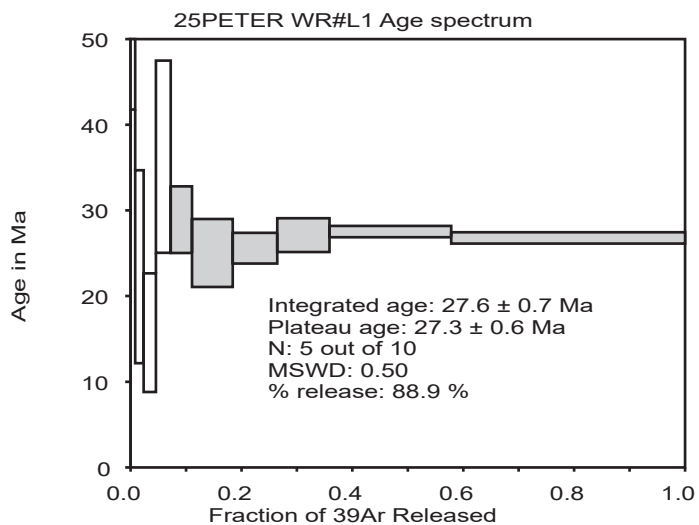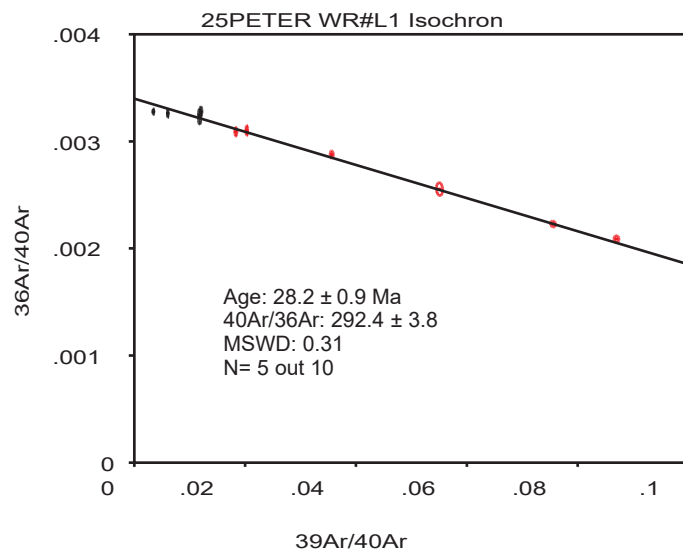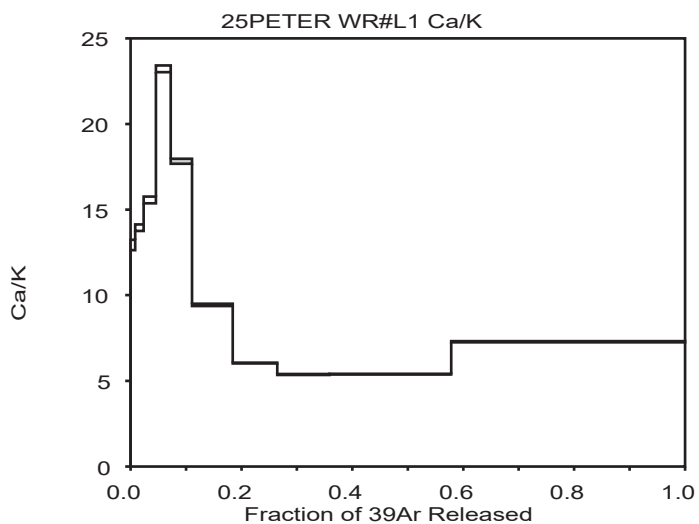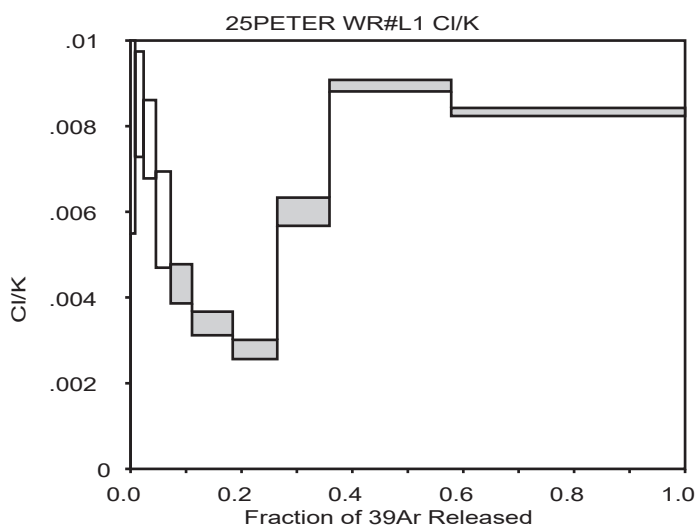

**Data Repository Item J-D.** Plots showing  $^{40}\text{Ar}$ - $^{39}\text{Ar}$  analytical results from mafic dike sample 25PETERS WR#1 along the Denali fault in the Alaska Range. MSWD—mean square of weighted deviates.

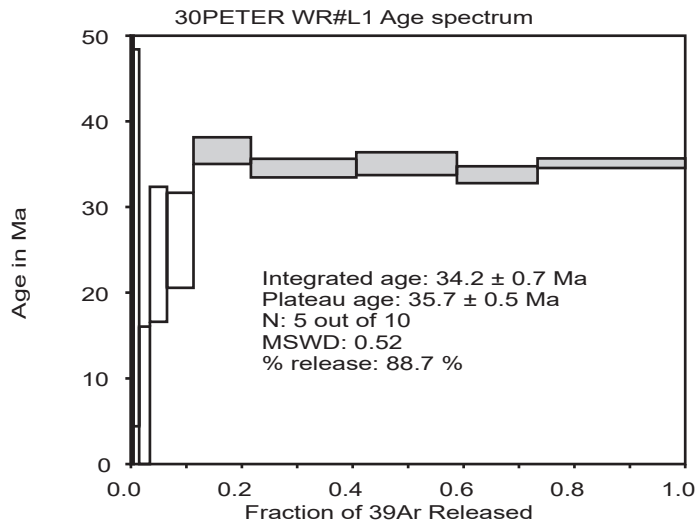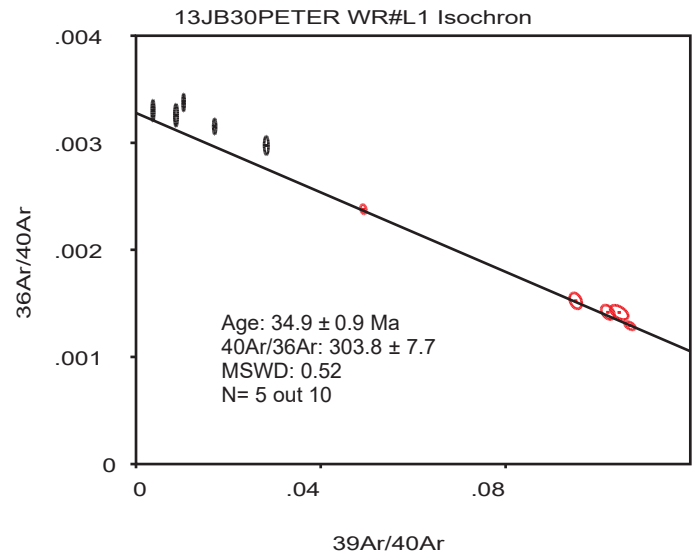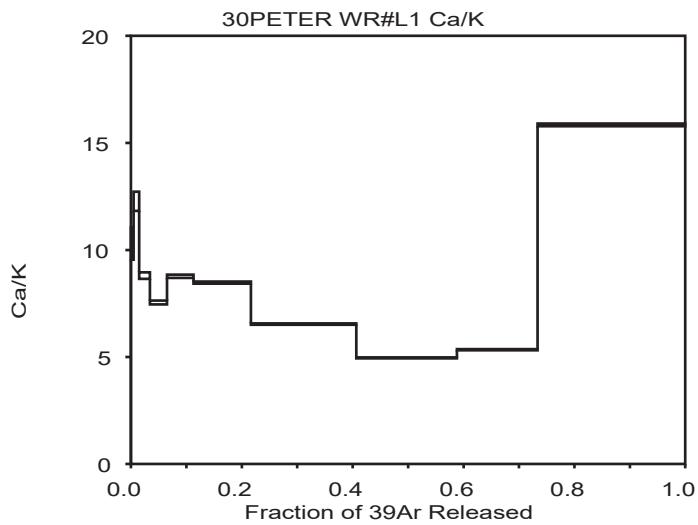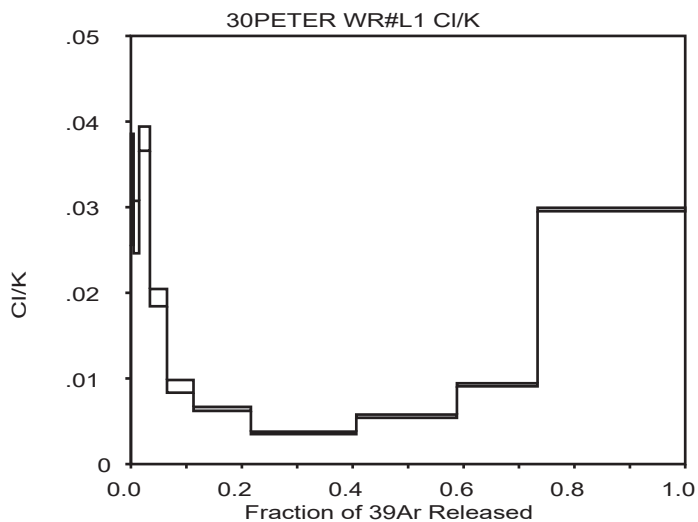

**Data Repository Item J-E.** Plots showing  $^{40}\text{Ar}$ - $^{39}\text{Ar}$  analytical results from mafic dike sample 30PETER WR#1 along the Denali fault in the Alaska Range. MSWD—mean square of weighted deviates.

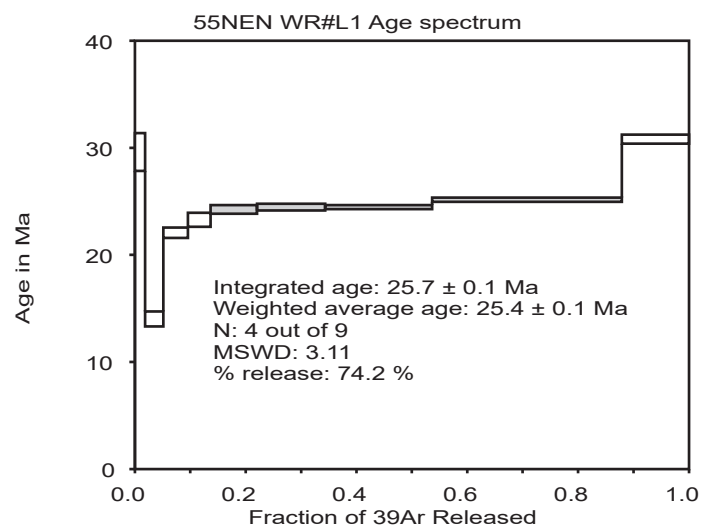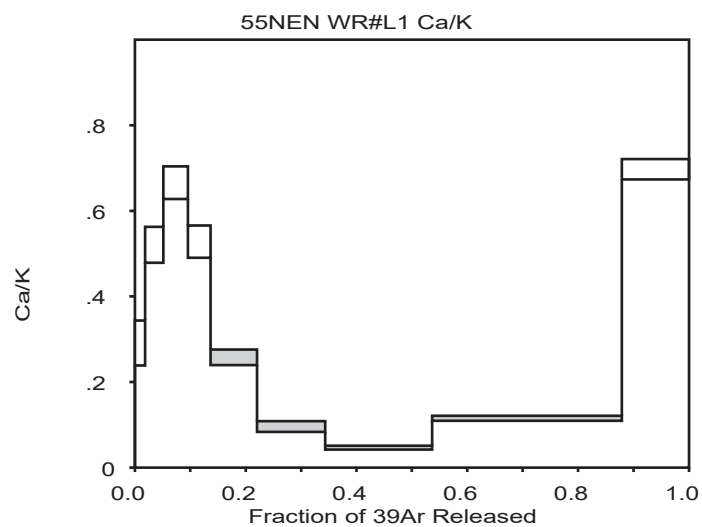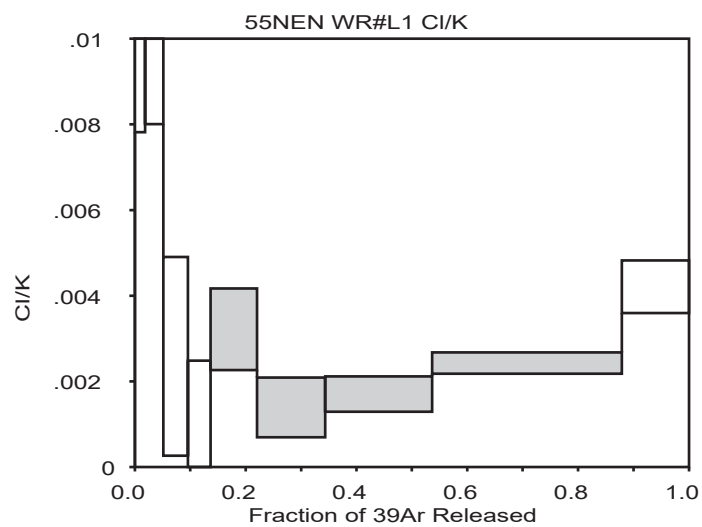

**Data Repository Item J-F.** Plots showing  $^{40}\text{Ar}$ - $^{39}\text{Ar}$  analytical results from mafic dike sample 55NEN WR#1 along the Denali fault in the Alaska Range. MSWD—mean

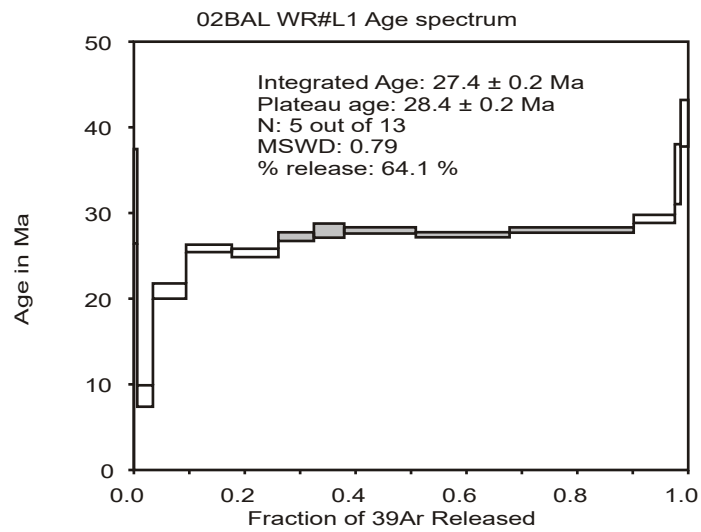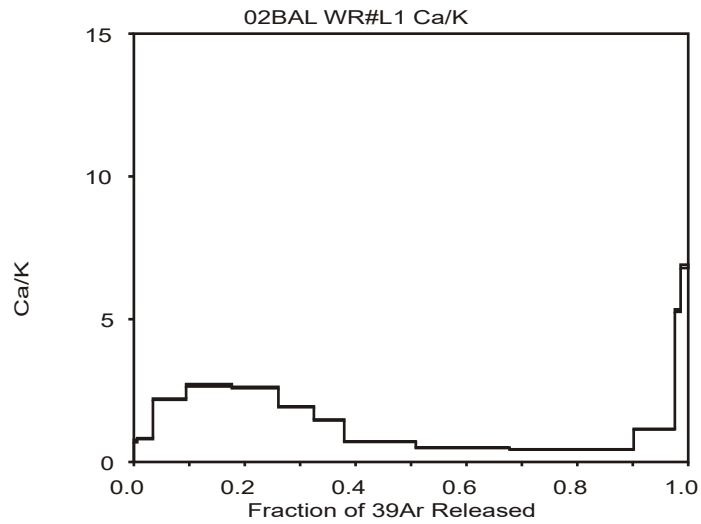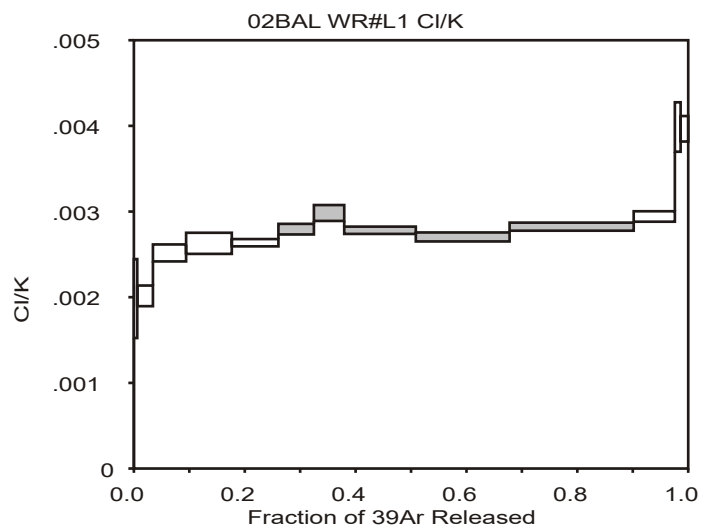

**Data Repository Item J-G.** Plots showing  $^{40}\text{Ar}$ - $^{39}\text{Ar}$  analytical results from mafic dike sample 02BAL WR#1 along the Denali fault in the Alaska Range. MSWD—mean square of weighted deviates.

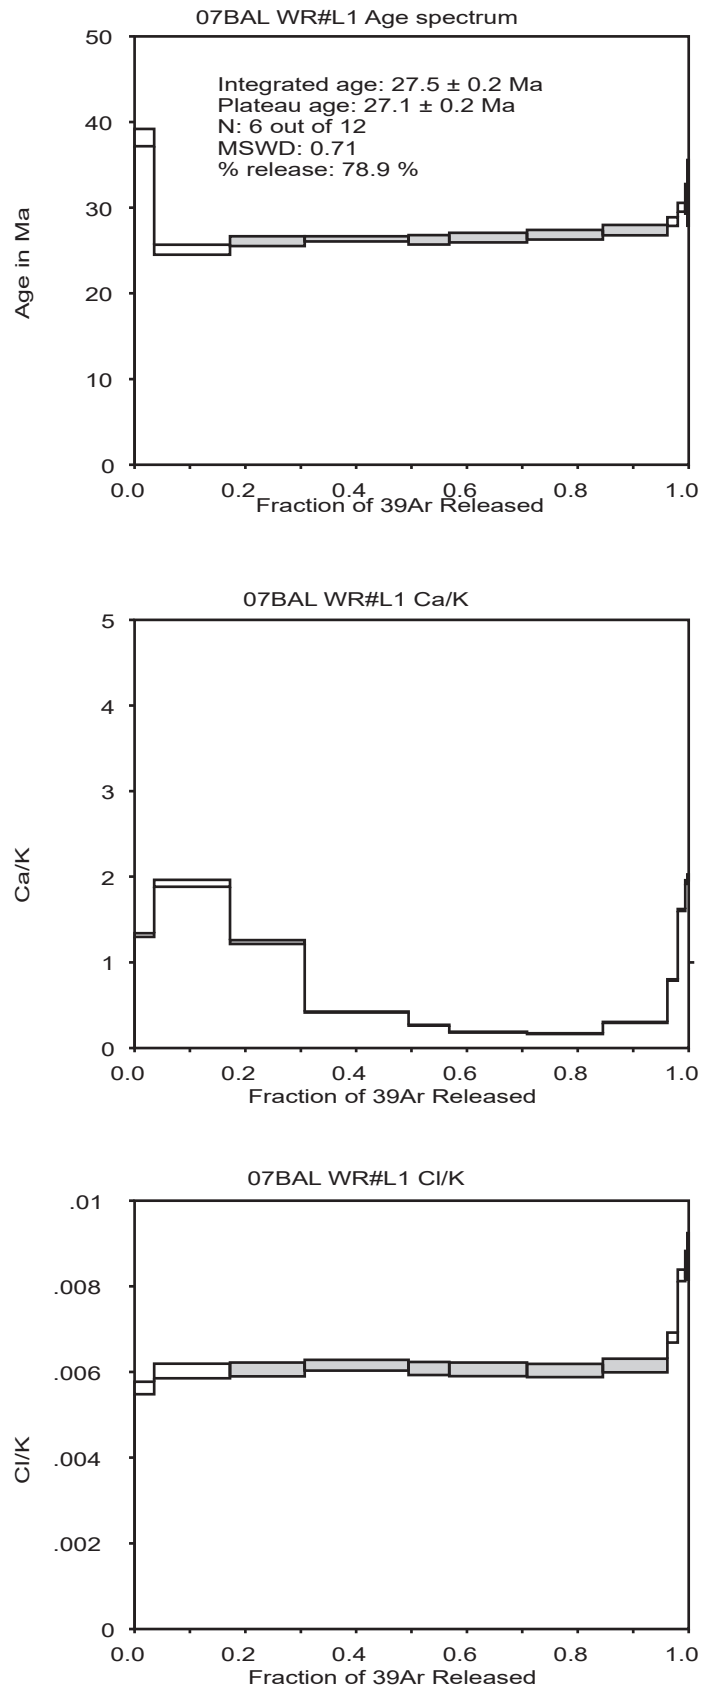

**Data Repository Item J-H.** Plots showing  $^{40}\text{Ar}$ - $^{39}\text{Ar}$  analytical results from mafic dike sample 07BAL WR#1 along the Denali fault in the Alaska Range. MSWD—mean square of weighted deviates.

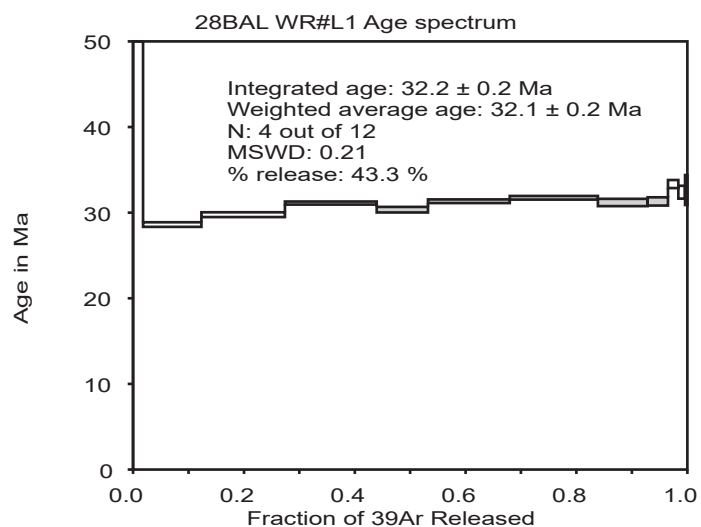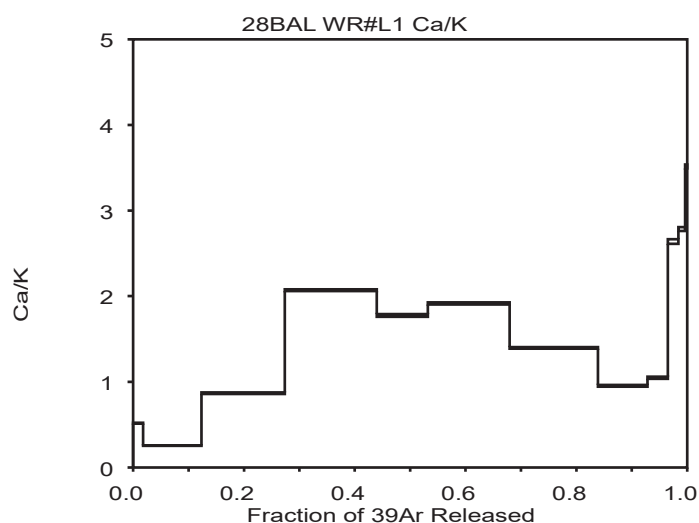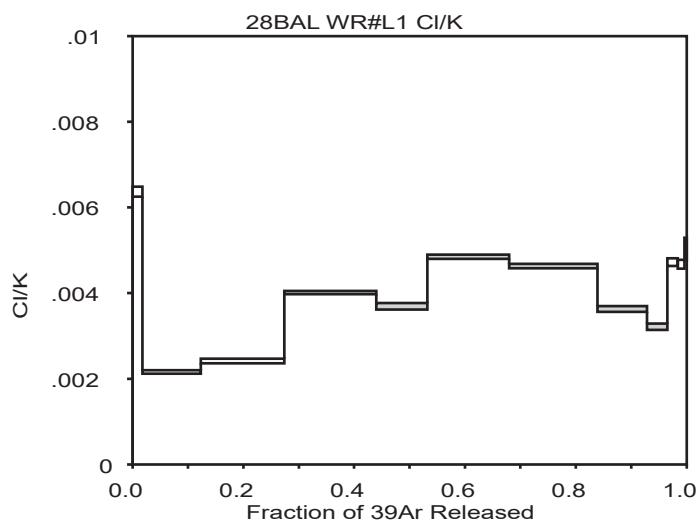

**Data Repository Item J-I.** Plots showing  $^{40}\text{Ar}$ - $^{39}\text{Ar}$  analytical results from mafic dike sample 28BAL WR#1 along the Denali fault in the Alaska Range. MSWD—mean square of weighted

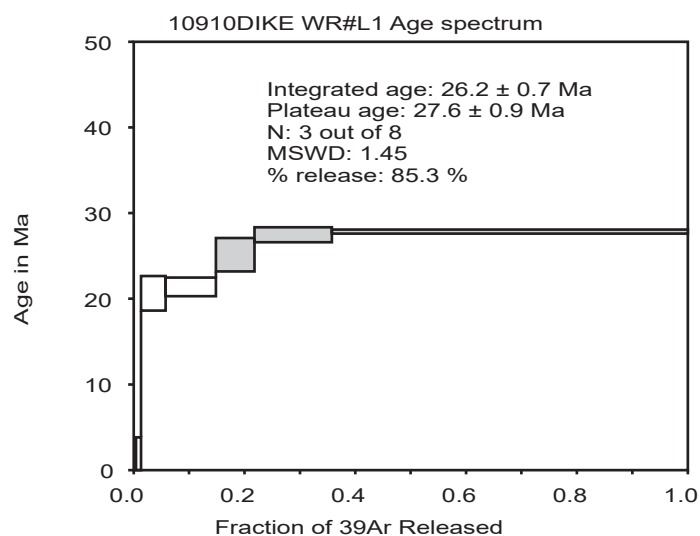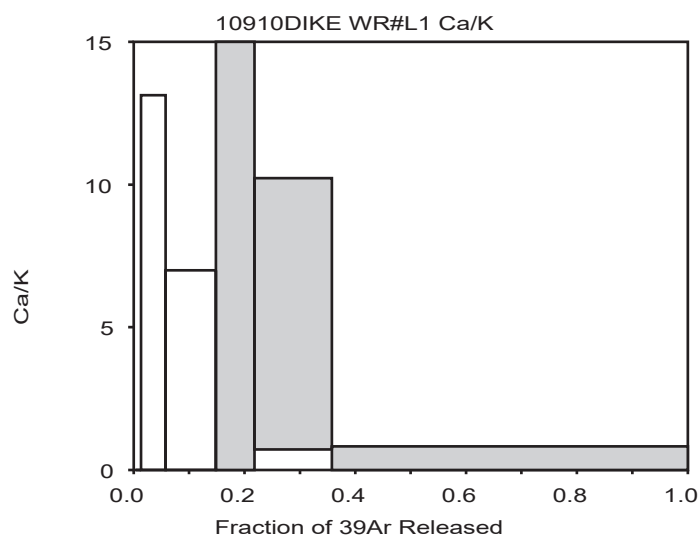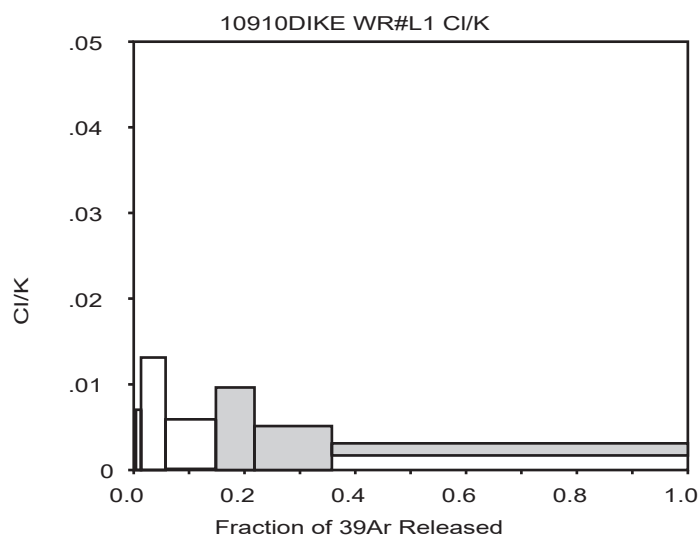

**Data Repository Item J-J.** Plots showing  $^{40}\text{Ar}$ - $^{39}\text{Ar}$  analytical results from mafic dike sample 10910DIKE WR#1 along the Denali fault in the Alaska Range. MSWD—mean square of weighted deviates.
