# Supplementary material
Source: publisher figshare collection journal article supplement (https://gsapubs.figshare.com/ndownloader/files/22411650)
Supplement: Supplementary file 1 [file 22411650 › Supp Item K - Modern river U-Pb raw data.pdf]

Data Repository Item K - U/Pb analytical results from detrital zircons from modern river sand, eastern Alaska Range

| Analysis                         | U (ppm) | Th (ppm) | U/Th | 207Pb 235U | 2 sigma | 206Pb 238U | 2 sigma | 207Pb 206Pb | 2 sigma | Error corr. | 207Pb 235U age (Ma) | 2 -sigma | 2 +sigma | 206Pb 238U age 2 -sigma | 2      | 207Pb 206Pb age (Ma) | 2 -sigma | 2 +sigma | Preferred age (Ma) | 2 -sigma | 2 +sigma | % 2Sigma | Age Type | Concordant scans            | Total scans |    |
|----------------------------------|---------|----------|------|------------|---------|------------|---------|-------------|---------|-------------|---------------------|----------|----------|-------------------------|--------|----------------------|----------|----------|--------------------|----------|----------|----------|----------|-----------------------------|-------------|----|
| Sample: Susitna Glacier terminus |         |          |      |            |         |            |         |             |         |             |                     |          |          |                         |        |                      |          |          |                    |          |          |          |          |                             |             |    |
| 12487a3 1                        | 399     | 140      | 2.85 | 0.09827    | 0.00884 | 0.01479    | 0.00047 | 0.04820     | 0.00439 | 0.11        | 95.18               | 8.19     | 8.15     | 94.64                   | 3.00   | 3.00                 | 108.89   | 217.79   | 208.49             | 94.64    | 3.00     | 3.00     | 3.17     | 206Pb/238U concordant scans | 35          | 47 |
| 12487a3 2                        | 1985    | 500      | 3.97 | 0.06990    | 0.00349 | 0.01043    | 0.00026 | 0.04860     | 0.00238 | 0.23        | 68.61               | 3.32     | 3.31     | 66.90                   | 1.63   | 1.63                 | 128.41   | 117.48   | 113.41             | 66.90    | 1.63     | 1.63     | 2.44     | 206Pb/238U concordant scans | 40          | 47 |
| 12487a3 3                        | 333     | 106      | 3.15 | 0.10633    | 0.01149 | 0.01507    | 0.00051 | 0.05118     | 0.00552 | 0.15        | 102.60              | 10.57    | 10.52    | 96.41                   | 3.23   | 3.23                 | 249.03   | 258.05   | 239.06             | 96.41    | 3.23     | 3.23     | 3.35     | 206Pb/238U concordant scans | 30          | 48 |
| 12487a3 4                        | 457     | 143      | 3.19 | 0.10288    | 0.00795 | 0.01506    | 0.00054 | 0.04953     | 0.00395 | 0.13        | 99.43               | 7.33     | 7.30     | 96.38                   | 3.46   | 3.45                 | 173.13   | 191.72   | 181.09             | 96.38    | 3.46     | 3.45     | 3.59     | 206Pb/238U concordant scans | 37          | 48 |
| 12487a3 6                        | 1751    | 231      | 7.57 | 0.03793    | 0.00314 | 0.00561    | 0.00018 | 0.04908     | 0.00412 | 0.13        | 37.80               | 3.07     | 3.07     | 36.03                   | 1.16   | 1.16                 | 151.42   | 202.88   | 191.04             | 36.03    | 1.16     | 1.16     | 3.23     | 206Pb/238U concordant scans | 47          | 48 |
| 12487a3 7                        | 1314    | 556      | 2.36 | 0.09252    | 0.00549 | 0.01407    | 0.00039 | 0.04770     | 0.00274 | 0.28        | 89.85               | 5.11     | 5.10     | 90.06                   | 2.51   | 2.51                 | 84.25    | 139.02   | 133.38             | 90.06    | 2.51     | 2.51     | 2.78     | 206Pb/238U concordant scans | 37          | 48 |
| 12487a3 9                        | 3346    | 459      | 7.29 | 0.03932    | 0.00204 | 0.00588    | 0.00017 | 0.04849     | 0.00244 | 0.29        | 39.16               | 1.99     | 1.99     | 37.81                   | 1.07   | 1.07                 | 123.08   | 120.78   | 116.49             | 37.81    | 1.07     | 1.07     | 2.83     | 206Pb/238U concordant scans | 43          | 48 |
| 12487a3 10                       | 2008    | 583      | 3.44 | 0.05826    | 0.00303 | 0.00868    | 0.00026 | 0.04870     | 0.00251 | 0.26        | 57.50               | 2.91     | 2.90     | 55.69                   | 1.66   | 1.66                 | 133.46   | 123.27   | 118.80             | 55.69    | 1.66     | 1.66     | 2.98     | 206Pb/238U concordant scans | 43          | 48 |
| 12487a3 11                       | 599     | 145      | 4.13 | 0.06861    | 0.00687 | 0.00994    | 0.00039 | 0.05005     | 0.00511 | 0.12        | 67.38               | 6.54     | 6.52     | 63.77                   | 2.46   | 2.46                 | 197.54   | 246.39   | 229.08             | 63.77    | 2.46     | 2.46     | 3.86     | 206Pb/238U concordant scans | 46          | 48 |
| 12487a3 12                       | 1526    | 533      | 2.87 | 0.10008    | 0.00447 | 0.01493    | 0.00056 | 0.04863     | 0.00211 | 0.42        | 96.85               | 4.13     | 4.12     | 95.50                   | 3.56   | 3.56                 | 130.25   | 103.62   | 100.44             | 95.50    | 3.56     | 3.56     | 3.73     | 206Pb/238U concordant scans | 36          | 48 |
| 12487a3 13                       | 308     | 85       | 3.61 | 0.10529    | 0.00937 | 0.01503    | 0.00051 | 0.05080     | 0.00452 | 0.17        | 101.65              | 8.62     | 8.59     | 96.17                   | 3.21   | 3.21                 | 231.97   | 211.95   | 198.99             | 96.17    | 3.21     | 3.21     | 3.34     | 206Pb/238U concordant scans | 28          | 47 |
| 12487a3 14                       | 304     | 92       | 3.31 | 0.03942    | 0.00598 | 0.00553    | 0.00026 | 0.05169     | 0.00805 | 0.05        | 39.26               | 5.85     | 5.83     | 35.56                   | 1.64   | 1.64                 | 271.86   | 378.10   | 338.62             | 35.56    | 1.64     | 1.64     | 4.62     | 206Pb/238U concordant scans | 41          | 48 |
| 12487a3 15                       | 1003    | 469      | 2.14 | 0.05856    | 0.00511 | 0.00888    | 0.00038 | 0.04780     | 0.00401 | 0.31        | 57.78               | 4.91     | 4.90     | 57.02                   | 2.40   | 2.40                 | 89.44    | 178.88   | 193.09             | 57.02    | 2.40     | 2.40     | 4.20     | 206Pb/238U concordant scans | 39          | 48 |
| 12487a3 16                       | 832     | 157      | 5.29 | 0.09847    | 0.00563 | 0.01501    | 0.00039 | 0.04760     | 0.00271 | 0.18        | 95.37               | 5.21     | 5.19     | 96.01                   | 2.45   | 2.45                 | 79.29    | 138.29   | 132.71             | 96.01    | 2.45     | 2.45     | 2.55     | 206Pb/238U concordant scans | 32          | 47 |
| 12487a3 17                       | 316     | 88       | 3.60 | 0.10098    | 0.01350 | 0.01490    | 0.00060 | 0.04915     | 0.00656 | 0.15        | 97.68               | 12.49    | 12.42    | 95.35                   | 3.83   | 3.83                 | 154.92   | 309.83   | 298.37             | 95.35    | 3.83     | 3.83     | 4.02     | 206Pb/238U concordant scans | 39          | 48 |
| 12487a3 18                       | 1609    | 491      | 3.28 | 0.03727    | 0.00263 | 0.00575    | 0.00021 | 0.04701     | 0.00336 | 0.20        | 37.16               | 2.57     | 2.57     | 36.96                   | 1.34   | 1.34                 | 49.91    | 99.82    | 166.35             | 36.96    | 1.34     | 1.34     | 3.64     | 206Pb/238U concordant scans | 32          | 47 |
| 12487a3 19                       | 241     | 70       | 3.43 | 0.10410    | 0.01458 | 0.01481    | 0.00064 | 0.05097     | 0.00721 | 0.11        | 100.55              | 13.46    | 13.37    | 94.78                   | 4.05   | 4.05                 | 239.56   | 343.42   | 310.60             | 94.78    | 4.05     | 4.05     | 4.28     | 206Pb/238U concordant scans | 35          | 48 |
| 12487a3 20                       | 1495    | 372      | 4.02 | 0.06393    | 0.00639 | 0.00920    | 0.00044 | 0.05040     | 0.00513 | 0.19        | 62.93               | 6.10     | 6.08     | 59.03                   | 2.79   | 2.79                 | 213.62   | 244.55   | 227.47             | 59.03    | 2.79     | 2.79     | 4.73     | 206Pb/238U concordant scans | 37          | 48 |
| 12487a3 21                       | 463     | 118      | 3.94 | 0.09588    | 0.00785 | 0.01411    | 0.00046 | 0.04929     | 0.00402 | 0.19        | 92.97               | 7.28     | 7.26     | 90.32                   | 2.94   | 2.94                 | 161.55   | 196.49   | 185.35             | 90.32    | 2.94     | 2.94     | 3.26     | 206Pb/238U concordant scans | 37          | 48 |
| 12487a3 22                       | 446     | 181      | 2.46 | 0.04003    | 0.00594 | 0.00566    | 0.00029 | 0.05127     | 0.00767 | 0.14        | 39.85               | 5.80     | 5.79     | 36.40                   | 1.84   | 1.84                 | 253.13   | 363.68   | 327.06             | 36.40    | 1.84     | 1.84     | 5.06     | 206Pb/238U concordant scans | 14          | 48 |
| 12487a3 23                       | 1514    | 422      | 3.59 | 0.03692    | 0.00250 | 0.00566    | 0.00014 | 0.04731     | 0.00319 | 0.17        | 36.81               | 2.45     | 2.45     | 36.39                   | 0.93   | 0.93                 | 64.67    | 129.33   | 156.64             | 36.39    | 0.93     | 0.93     | 2.55     | 206Pb/238U concordant scans | 37          | 48 |
| 12487a3 25                       | 334     | 78       | 4.28 | 0.10024    | 0.01203 | 0.01504    | 0.00049 | 0.04835     | 0.00584 | 0.09        | 97.00               | 11.14    | 11.08    | 96.22                   | 3.13   | 3.13                 | 116.28   | 232.55   | 273.31             | 96.22    | 3.13     | 3.13     | 3.25     | 206Pb/238U concordant scans | 41          | 48 |
| 12487a3 26                       | 507     | 89       | 5.71 | 0.09734    | 0.00971 | 0.01464    | 0.00038 | 0.04821     | 0.00481 | 0.10        | 94.32               | 9.00     | 8.96     | 93.71                   | 2.43   | 2.42                 | 109.65   | 219.29   | 227.57             | 93.71    | 2.43     | 2.42     | 2.59     | 206Pb/238U concordant scans | 37          | 47 |
| 12487a3 27                       | 341     | 103      | 3.33 | 0.07230    | 0.00722 | 0.01032    | 0.00040 | 0.05081     | 0.00514 | 0.14        | 70.88               | 6.85     | 6.83     | 66.19                   | 2.53   | 2.53                 | 232.01   | 242.52   | 225.70             | 66.19    | 2.53     | 2.53     | 3.82     | 206Pb/238U concordant scans | 0           | 47 |
| 12487a3 28                       | 818     | 274      | 2.99 | 0.10076    | 0.00570 | 0.01503    | 0.00044 | 0.04862     | 0.00275 | 0.22        | 97.48               | 5.26     | 5.25     | 96.17                   | 2.82   | 2.82                 | 129.64   | 136.05   | 130.63             | 96.17    | 2.82     | 2.82     | 2.93     | 206Pb/238U concordant scans | 31          | 48 |
| 12487a3 29                       | 1       | 0        | 4.41 | 1.41843    | 2.16001 | 0.03115    | 0.02075 | 0.33027     | 0.53868 | 0.05        | 896.70              | 1201.45  | 749.75   | 197.73                  | 130.41 | 129.10               | 3618.35  | 5962.78  | 1777.41            | 197.73   | 130.41   | 129.10   | 65.95    | 206Pb/238U concordant scans | 43          | 48 |
| 12487a3 30                       | 262     | 68       | 3.89 | 0.10793    | 0.01319 | 0.01462    | 0.00058 | 0.05354     | 0.00662 | 0.11        | 104.07              | 12.12    | 12.05    | 93.57                   | 3.70   | 3.70                 | 351.62   | 292.32   | 268.04             | 93.57    | 3.70     | 3.70     | 3.95     | 206Pb/238U concordant scans | 39          | 48 |
| 12487a3 31                       | 566     | 203      | 2.78 | 0.09738    | 0.00861 | 0.01471    | 0.00046 | 0.04802     | 0.00421 | 0.18        | 94.35               | 7.98     | 7.95     | 94.13                   | 2.89   | 2.89                 | 100.02   | 200.04   | 201.13             | 94.13    | 2.89     | 2.89     | 3.07     | 206Pb/238U concordant scans | 30          | 47 |
| 12487a3 32                       | 299     | 83       | 3.62 | 0.10241    | 0.00842 | 0.01505    | 0.00057 | 0.04937     | 0.00408 | 0.20        | 99.00               | 7.77     | 7.74     | 96.27                   | 3.62   | 3.62                 | 165.29   | 199.09   | 187.66             | 96.27    | 3.62     | 3.62     | 3.76     | 206Pb/238U concordant scans | 29          | 38 |
| 12487a3 33                       | 591     | 221      | 2.67 | 0.09508    | 0.00689 | 0.01439    | 0.00055 | 0.04793     | 0.00337 | 0.30        | 92.23               | 6.40     | 6.38     | 92.10                   | 3.47   | 3.47                 | 95.59    | 170.83   | 162.39             | 92.10    | 3.47     | 3.47     | 3.76     | 206Pb/238U concordant scans | 42          | 48 |
| 12487a3 34                       | 279     | 67       | 4.14 | 0.10363    | 0.01216 | 0.01465    | 0.00061 | 0.05132     | 0.00610 | 0.13        | 100.12              | 11.22    | 11.16    | 93.73                   | 3.86   | 3.86                 | 255.15   | 285.26   | 262.22             | 93.73    | 3.86     | 3.86     | 4.12     | 206Pb/238U concordant scans | 34          | 48 |
| 12487a3 35                       | 670     | 279      | 2.40 | 0.04200    | 0.00506 | 0.00553    | 0.00025 | 0.05057     | 0.00666 | 0.17        | 41.77               | 4.94     | 4.92     | 35.56                   | 1.61   | 1.61                 | 414.99   | 282.33   | 259.53             | 35.56    | 1.61     | 1.61     | 4.54     | 206Pb/238U concordant scans | 39          | 48 |
| 12487a3 36                       | 1132    | 209      | 5.43 | 0.06307    | 0.00500 | 0.00943    | 0.00034 | 0.04849     | 0.00384 | 0.14        | 62.10               | 4.78     | 4.77     | 60.53                   | 1.51   | 1.51                 | 123.37   | 191.94   | 181.32             | 60.53    | 1.51     | 1.51     | 2.49     | 206Pb/238U concordant scans | 31          | 47 |
| 12487a3 37                       | 3647    | 3098     | 1.18 | 0.03816    | 0.00148 | 0.00551    | 0.00013 | 0.04756     | 0.00185 | 0.33        | 36.07               | 1.45     | 1.45     | 35.45                   | 0.81   | 0.81                 | 77.47    | 93.74    | 91.14              | 35.45    | 0.81     | 0.81     | 2.27     | 206Pb/238U concordant scans | 47          | 48 |
| 12487a3 38                       | 2033    | 275      | 7.38 | 0.08849    | 0.00344 | 0.01322    | 0.00027 | 0.04856     | 0.00177 | 0.35        |                     |          |          |                         |        |                      |          |          |                    |          |          |          |          |                             |             |    |

|         |     |       |      |      |         |         |         |         |         |         |      |        |       |       |       |      |      |        |        |        |       |      |      |      |                             |    |    |
|---------|-----|-------|------|------|---------|---------|---------|---------|---------|---------|------|--------|-------|-------|-------|------|------|--------|--------|--------|-------|------|------|------|-----------------------------|----|----|
| 12487a3 | 75  | 1582  | 366  | 4.32 | 0.06446 | 0.00454 | 0.00995 | 0.00033 | 0.04699 | 0.00331 | 0.21 | 63.43  | 4.34  | 4.33  | 63.82 | 2.10 | 2.10 | 48.59  | 97.19  | 163.91 | 63.82 | 2.10 | 2.10 | 3.30 | 206Pb/238U concordant scans | 36 | 48 |
| 12487a3 | 76  | 465   | 116  | 4.01 | 0.10264 | 0.00681 | 0.01500 | 0.00046 | 0.04963 | 0.00329 | 0.21 | 99.21  | 6.28  | 6.26  | 95.97 | 2.90 | 2.90 | 177.85 | 158.10 | 150.80 | 95.97 | 2.90 | 2.90 | 3.03 | 206Pb/238U concordant scans | 38 | 47 |
| 12487a3 | 77  | 278   | 51   | 5.40 | 0.07021 | 0.00750 | 0.01031 | 0.00043 | 0.04939 | 0.00541 | 0.11 | 68.89  | 7.13  | 7.10  | 66.12 | 2.76 | 2.76 | 166.25 | 266.54 | 246.43 | 66.12 | 2.76 | 2.76 | 4.18 | 206Pb/238U concordant scans | 43 | 47 |
| 12487a3 | 78  | 236   | 92   | 2.56 | 0.03710 | 0.00929 | 0.00532 | 0.00047 | 0.05061 | 0.01312 | 0.07 | 36.99  | 9.12  | 9.08  | 34.18 | 3.03 | 3.03 | 223.30 | 446.61 | 549.80 | 34.18 | 3.03 | 3.03 | 8.87 | 206Pb/238U concordant scans | 36 | 48 |
| 12487a3 | 79  | 114   | 71   | 1.60 | 0.13975 | 0.03825 | 0.01519 | 0.00108 | 0.06672 | 0.01828 | 0.12 | 132.82 | 34.36 | 33.79 | 97.20 | 6.89 | 6.89 | 828.99 | 630.29 | 524.55 | 97.20 | 6.89 | 6.89 | 7.09 | 206Pb/238U concordant scans | 38 | 48 |
| 12487a3 | 81  | 750   | 151  | 4.95 | 0.06920 | 0.00510 | 0.01007 | 0.00032 | 0.04985 | 0.00367 | 0.20 | 67.94  | 4.85  | 4.84  | 64.57 | 2.06 | 2.06 | 188.07 | 175.74 | 166.76 | 64.57 | 2.06 | 2.06 | 3.19 | 206Pb/238U concordant scans | 32 | 47 |
| 12487a3 | 82  | 440   | 136  | 3.23 | 0.06852 | 0.00656 | 0.01023 | 0.00042 | 0.04860 | 0.00483 | 0.11 | 67.30  | 6.25  | 6.23  | 65.59 | 2.68 | 2.67 | 128.52 | 242.61 | 225.88 | 65.59 | 2.68 | 2.67 | 4.08 | 206Pb/238U concordant scans | 39 | 48 |
| 12487a3 | 83  | 819   | 108  | 7.56 | 0.06660 | 0.00526 | 0.01003 | 0.00036 | 0.04815 | 0.00387 | 0.16 | 65.47  | 5.01  | 5.00  | 64.35 | 2.28 | 2.28 | 106.55 | 195.58 | 184.57 | 64.35 | 2.28 | 2.28 | 3.54 | 206Pb/238U concordant scans | 22 | 48 |
| 12487a3 | 84  | 707   | 298  | 2.37 | 0.03731 | 0.00518 | 0.00563 | 0.00022 | 0.04806 | 0.00676 | 0.08 | 37.19  | 5.08  | 5.07  | 36.19 | 1.41 | 1.41 | 102.26 | 204.52 | 316.68 | 36.19 | 1.41 | 1.41 | 3.89 | 206Pb/238U concordant scans | 17 | 48 |
| 12487a3 | 85  | 484   | 179  | 2.70 | 0.03978 | 0.00635 | 0.00553 | 0.00027 | 0.05216 | 0.00849 | 0.07 | 39.61  | 6.21  | 6.19  | 35.56 | 1.71 | 1.71 | 292.26 | 394.76 | 351.87 | 35.56 | 1.71 | 1.71 | 4.81 | 206Pb/238U concordant scans | 8  | 47 |
| 12487a3 | 86  | 549   | 116  | 4.71 | 0.06185 | 0.00643 | 0.00955 | 0.00035 | 0.04698 | 0.00490 | 0.15 | 60.94  | 6.16  | 6.14  | 61.26 | 2.24 | 2.24 | 48.37  | 96.75  | 240.00 | 61.26 | 2.24 | 2.24 | 3.66 | 206Pb/238U concordant scans | 42 | 48 |
| 12487a3 | 87  | 1446  | 302  | 4.80 | 0.06457 | 0.00368 | 0.00974 | 0.00035 | 0.04807 | 0.00275 | 0.28 | 63.53  | 3.51  | 3.51  | 62.50 | 2.25 | 2.25 | 102.65 | 138.38 | 132.78 | 62.50 | 2.25 | 2.25 | 3.59 | 206Pb/238U concordant scans | 36 | 48 |
| 12487a3 | 88  | 188   | 27   | 7.03 | 0.06280 | 0.01286 | 0.00898 | 0.00043 | 0.05071 | 0.01055 | 0.04 | 61.84  | 12.33 | 12.25 | 57.63 | 2.77 | 2.77 | 227.84 | 455.69 | 448.10 | 57.63 | 2.77 | 2.77 | 4.80 | 206Pb/238U concordant scans | 32 | 48 |
| 12487a3 | 89  | 1388  | 252  | 5.52 | 0.05910 | 0.00516 | 0.00898 | 0.00033 | 0.04774 | 0.00423 | 0.16 | 58.30  | 4.95  | 4.94  | 57.62 | 2.11 | 2.11 | 86.28  | 172.56 | 203.60 | 57.62 | 2.11 | 2.11 | 3.67 | 206Pb/238U concordant scans | 24 | 48 |
| 12487a3 | 90  | 687   | 207  | 3.33 | 0.10293 | 0.00710 | 0.01459 | 0.00039 | 0.05118 | 0.00350 | 0.20 | 99.48  | 6.55  | 6.53  | 93.35 | 2.50 | 2.49 | 249.13 | 161.11 | 153.50 | 93.35 | 2.50 | 2.49 | 2.67 | 206Pb/238U concordant scans | 29 | 48 |
| 12487a3 | 91  | 874   | 402  | 2.18 | 0.09509 | 0.00577 | 0.01441 | 0.00048 | 0.04786 | 0.00293 | 0.23 | 92.24  | 5.35  | 5.34  | 92.24 | 3.06 | 3.06 | 92.22  | 148.48 | 142.06 | 92.24 | 3.06 | 3.06 | 3.32 | 206Pb/238U concordant scans | 40 | 48 |
| 12487a3 | 92  | 749   | 168  | 4.46 | 0.03806 | 0.00508 | 0.00576 | 0.00045 | 0.04796 | 0.00644 | 0.14 | 37.93  | 4.98  | 4.97  | 37.00 | 1.63 | 1.63 | 97.23  | 194.47 | 303.52 | 97.00 | 1.63 | 1.63 | 4.41 | 206Pb/238U concordant scans | 41 | 48 |
| 12487a3 | 93  | 2202  | 1085 | 2.03 | 0.06638 | 0.00281 | 0.01026 | 0.00025 | 0.04693 | 0.00197 | 0.26 | 65.26  | 2.68  | 2.68  | 65.80 | 1.61 | 1.61 | 45.55  | 91.10  | 98.79  | 65.80 | 1.61 | 1.61 | 2.44 | 206Pb/238U concordant scans | 33 | 47 |
| 12487a3 | 94  | 3123  | 404  | 7.76 | 0.05745 | 0.00277 | 0.00875 | 0.00030 | 0.04763 | 0.00232 | 0.31 | 56.72  | 2.66  | 2.66  | 56.14 | 1.95 | 1.95 | 81.06  | 117.77 | 113.70 | 56.14 | 1.95 | 1.95 | 3.47 | 206Pb/238U concordant scans | 27 | 47 |
| 12487a3 | 95  | 367   | 58   | 6.34 | 0.06946 | 0.00965 | 0.01011 | 0.00043 | 0.04985 | 0.00688 | 0.17 | 68.19  | 9.18  | 9.14  | 64.82 | 2.74 | 2.74 | 188.15 | 338.01 | 306.27 | 64.82 | 2.74 | 2.74 | 4.23 | 206Pb/238U concordant scans | 41 | 47 |
| 12487a3 | 96  | 436   | 152  | 2.87 | 0.10402 | 0.01017 | 0.01486 | 0.00049 | 0.05078 | 0.00498 | 0.14 | 100.48 | 9.37  | 9.33  | 95.07 | 3.10 | 3.10 | 230.74 | 234.68 | 218.89 | 95.07 | 3.10 | 3.10 | 3.27 | 206Pb/238U concordant scans | 40 | 48 |
| 12487a3 | 97  | 17122 | 4082 | 4.19 | 0.04734 | 0.00191 | 0.00718 | 0.00027 | 0.04783 | 0.00149 | 0.66 | 46.97  | 1.86  | 1.85  | 46.11 | 1.73 | 1.73 | 91.00  | 74.89  | 73.22  | 46.11 | 1.73 | 1.73 | 3.75 | 206Pb/238U concordant scans | 27 | 48 |
| 12487a3 | 98  | 677   | 273  | 2.48 | 0.10206 | 0.00495 | 0.01499 | 0.00047 | 0.04937 | 0.00242 | 0.26 | 98.68  | 4.56  | 4.55  | 95.93 | 2.98 | 2.98 | 165.61 | 116.75 | 112.72 | 95.93 | 2.98 | 2.98 | 3.11 | 206Pb/238U concordant scans | 40 | 48 |
| 12487a3 | 99  | 2122  | 1201 | 1.77 | 0.06657 | 0.00355 | 0.01002 | 0.00028 | 0.04818 | 0.00248 | 0.30 | 65.44  | 3.38  | 3.38  | 64.28 | 1.80 | 1.80 | 108.28 | 124.07 | 119.55 | 64.28 | 1.80 | 1.80 | 2.80 | 206Pb/238U concordant scans | 36 | 48 |
| 12487a3 | 100 | 236   | 58   | 4.09 | 0.10660 | 0.01092 | 0.01503 | 0.00055 | 0.05144 | 0.00537 | 0.11 | 102.85 | 10.05 | 10.00 | 96.17 | 3.47 | 3.47 | 260.53 | 248.94 | 231.21 | 96.17 | 3.47 | 3.47 | 3.61 | 206Pb/238U concordant scans | 32 | 48 |
| 12487a3 | 101 | 402   | 104  | 3.88 | 0.10137 | 0.00857 | 0.01493 | 0.00054 | 0.04923 | 0.00431 | 0.11 | 98.04  | 7.92  | 7.89  | 95.56 | 3.43 | 3.42 | 158.85 | 211.38 | 198.55 | 95.56 | 3.43 | 3.42 | 3.59 | 206Pb/238U concordant scans | 41 | 48 |
| 12487a3 | 102 | 870   | 239  | 3.64 | 0.09915 | 0.00638 | 0.01513 | 0.00049 | 0.04753 | 0.00298 | 0.29 | 95.99  | 5.91  | 5.89  | 96.79 | 3.13 | 3.13 | 76.14  | 152.08 | 145.64 | 96.79 | 3.13 | 3.13 | 3.23 | 206Pb/238U concordant scans | 44 | 48 |
| 12487a3 | 103 | 8551  | 1665 | 5.13 | 0.05243 | 0.00178 | 0.00810 | 0.00022 | 0.04695 | 0.00146 | 0.45 | 51.89  | 1.72  | 1.72  | 52.01 | 1.38 | 1.38 | 46.48  | 75.09  | 73.41  | 52.01 | 1.38 | 1.38 | 2.65 | 206Pb/238U concordant scans | 31 | 48 |
| 12487a3 | 104 | 392   | 104  | 3.75 | 0.06434 | 0.00843 | 0.00906 | 0.00041 | 0.05151 | 0.00677 | 0.16 | 63.31  | 8.06  | 8.03  | 58.13 | 2.65 | 2.65 | 263.79 | 316.66 | 288.51 | 58.13 | 2.65 | 2.65 | 4.56 | 206Pb/238U concordant scans | 31 | 47 |
| 12487a3 | 105 | 6195  | 790  | 7.85 | 0.06046 | 0.00315 | 0.00908 | 0.00036 | 0.04831 | 0.00210 | 0.57 | 59.61  | 3.02  | 3.01  | 58.25 | 2.27 | 2.28 | 114.45 | 103.98 | 100.79 | 58.25 | 2.27 | 2.28 | 3.90 | 206Pb/238U concordant scans | 32 | 47 |
| 12487a3 | 106 | 1605  | 601  | 2.67 | 0.09768 | 0.00499 | 0.01478 | 0.00045 | 0.04793 | 0.00234 | 0.35 | 94.64  | 4.62  | 4.61  | 94.59 | 2.84 | 2.84 | 95.67  | 117.46 | 113.40 | 94.59 | 2.84 | 2.84 | 3.00 | 206Pb/238U concordant scans | 33 | 48 |
| 12487a3 | 107 | 2421  | 1043 | 2.32 | 0.06174 | 0.00342 | 0.00918 | 0.00027 | 0.04878 | 0.00266 | 0.27 | 60.83  | 3.28  | 3.27  | 58.90 | 1.74 | 1.74 | 137.34 | 130.65 | 123.63 | 58.90 | 1.74 | 1.74 | 2.95 | 206Pb/238U concordant scans | 29 | 47 |
| 12487a3 | 108 | 1069  | 491  | 2.18 | 0.03761 | 0.00416 | 0.00553 | 0.00020 | 0.04929 | 0.00557 | 0.08 | 37.49  | 4.08  | 4.07  | 35.58 | 1.31 | 1.31 | 161.75 | 275.74 | 254.29 | 35.58 | 1.31 | 1.31 | 3.67 | 206Pb/238U concordant scans | 42 | 48 |
| 12487a3 | 109 | 732   | 261  | 2.81 | 0.10071 | 0.00684 | 0.01518 | 0.00037 | 0.04811 | 0.00321 | 0.20 | 97.44  | 6.32  | 6.30  | 97.14 | 2.34 | 2.34 | 104.60 | 161.76 | 154.17 | 97.14 | 2.34 | 2.34 | 2.41 | 206Pb/238U concordant scans | 31 | 48 |
| 12487a3 | 110 | 2153  | 303  | 7.11 | 0.05985 | 0.00300 | 0.00895 | 0.00025 | 0.04852 | 0.00250 | 0.18 | 59.02  | 2.88  | 2.87  | 57.41 | 1.59 | 1.59 | 124.61 | 123.79 | 119.29 | 57.41 | 1.59 | 1.59 | 2.78 | 206Pb/238U concordant scans | 41 | 48 |
| 12487a3 | 111 | 356   | 105  | 3.39 | 0.10198 | 0.01206 | 0.01517 | 0.00056 | 0.04876 | 0.00588 | 0.07 | 98.60  | 11.14 | 11.08 | 97.05 | 3.54 | 3.53 | 136.29 | 272.59 | 271.83 | 97.05 | 3.54 | 3.53 | 3.64 | 206Pb/238U concordant scans | 47 | 48 |
| 12487a3 | 112 | 4451  | 567  | 7.85 | 0.07137 | 0.00263 | 0.01079 | 0.00028 | 0.04795 | 0.00162 | 0.42 | 70.00  | 2.49  | 2.49  | 69.21 | 1.77 | 1.77 | 97.00  | 81.00  | 79.05  | 69.21 | 1.77 | 1.77 | 2.56 | 206Pb/238U concordant scans | 42 | 48 |
| 12487a3 | 113 | 2327  | 1042 | 2.23 | 0.05644 | 0.00304 | 0.00871 | 0.00020 | 0.04698 | 0.00249 | 0.21 | 55.75  | 2.92  | 2.92  | 55.93 | 1.26 | 1.26 | 48.01  | 96.01  | 124.20 | 55.93 | 1.26 | 1.26 | 2.26 | 206Pb/238U concordant scans | 41 | 48 |
| 12487a3 | 114 | 905   | 411  | 2.20 | 0.03682 | 0.00368 | 0.00540 | 0.00021 | 0.04945 | 0.00501 | 0.14 | 36.71  | 3.61  | 3.60  | 34.71 | 1.32 | 1.32 | 169.25 | 245.74 | 228.55 | 34.71 | 1.32 | 1.32 | 3.81 | 206Pb/238U concordant scans | 38 | 47 |
| 12487a3 | 115 | 775   | 187  | 4.15 | 0.10035 | 0.01997 | 0.01530 | 0.00041 | 0.04757 | 0.00946 | 0.06 | 97.10  | 18.51 | 18.34 | 97.88 | 2.61 | 2.61 | 77.85  | 155.69 | 141.21 | 97.88 | 2.61 | 2.61 | 2.66 | 206Pb/238U concordant scans | 37 | 48 |
| 12487a3 | 116 | 491   | 161  | 3.04 | 0.10570 | 0.00901 | 0.01493 | 0.00055 | 0.05136 | 0.00429 | 0.25 | 102.03 | 8.29  | 8.26  | 95.51 | 3.47 | 3.47 | 257.10 | 197.68 | 186.34 | 95.51 | 3.47 | 3.47 | 3.64 | 206Pb/238U concordant scans | 32 | 48 |
| 12487a3 | 117 | 387   | 115  | 3.37 | 0.10345 | 0.00891 | 0.01508 | 0.00045 | 0.04977 | 0.00436 | 0.10 | 99.96  | 8.22  | 8.19  | 96.46 | 2.88 | 2.88 | 184.13 | 210.59 | 197.83 | 96.46 | 2.88 | 2.88 | 2.99 | 206Pb/238U concordant scans | 43 | 48 |
| 12487a3 | 118 | 545   | 171  | 3.18 | 0.10591 | 0.01129 | 0.01485 | 0.00044 | 0.05173 | 0.00554 | 0.10 | 102.21 | 10.39 | 10.34 | 95.01 | 2.81 | 2.81 | 273.55 | 255.13 | 236.53 | 95.01 | 2.81 |      |      |                             |    |    |

|         |     |      |      |      |         |         |         |         |         |         |       |        |       |       |       |      |        |        |        |        |       |      |      |                             |                             |    |    |
|---------|-----|------|------|------|---------|---------|---------|---------|---------|---------|-------|--------|-------|-------|-------|------|--------|--------|--------|--------|-------|------|------|-----------------------------|-----------------------------|----|----|
| 12484a1 | 85  | 950  | 349  | 2.72 | 0.09615 | 0.00598 | 0.01424 | 0.00041 | 0.04897 | 0.00295 | 0.27  | 93.21  | 5.55  | 5.53  | 91.14 | 2.58 | 2.57   | 146.51 | 144.30 | 138.20 | 91.14 | 2.58 | 2.57 | 2.83                        | 206Pb/238U concordant scans | 39 | 48 |
| 12484a1 | 36  | 806  | 197  | 4.09 | 0.09487 | 0.00618 | 0.01429 | 0.00043 | 0.04815 | 0.00311 | 0.21  | 92.03  | 5.74  | 5.72  | 91.47 | 2.76 | 2.76   | 106.53 | 156.52 | 149.40 | 91.47 | 2.76 | 2.76 | 3.02                        | 206Pb/238U concordant scans | 1  | 48 |
| 12484a1 | 31  | 598  | 126  | 4.73 | 0.09804 | 0.00784 | 0.01432 | 0.00045 | 0.00398 | 0.16    | 94.96 | 7.26   | 7.24  | 91.66 | 2.86  | 2.86 | 178.74 | 192.24 | 181.55 | 91.66  | 2.86  | 2.86 | 3.12 | 206Pb/238U concordant scans | 34                          | 48 |    |
| 12484a1 | 116 | 902  | 265  | 3.41 | 0.09950 | 0.00652 | 0.01432 | 0.00039 | 0.05038 | 0.00333 | 0.14  | 96.31  | 6.03  | 6.01  | 91.67 | 2.45 | 2.46   | 212.76 | 156.99 | 149.77 | 91.67 | 2.45 | 2.46 | 2.68                        | 206Pb/238U concordant scans | 0  | 48 |
| 12484a1 | 27  | 558  | 179  | 3.12 | 0.09682 | 0.00700 | 0.01434 | 0.00051 | 0.04896 | 0.00351 | 0.24  | 93.84  | 6.49  | 6.47  | 91.81 | 3.26 | 3.26   | 145.91 | 172.47 | 163.84 | 91.81 | 3.26 | 3.26 | 3.55                        | 206Pb/238U concordant scans | 34 | 47 |
| 12484a1 | 13  | 522  | 96   | 5.45 | 0.09807 | 0.00845 | 0.01436 | 0.00053 | 0.04955 | 0.00437 | 0.13  | 94.99  | 7.83  | 7.80  | 91.88 | 3.39 | 3.39   | 173.88 | 212.50 | 199.52 | 91.88 | 3.39 | 3.39 | 3.69                        | 206Pb/238U concordant scans | 34 | 48 |
| 12484a1 | 53  | 552  | 100  | 5.51 | 0.09872 | 0.00790 | 0.01436 | 0.00049 | 0.04985 | 0.00401 | 0.17  | 95.59  | 7.31  | 7.28  | 91.93 | 3.12 | 3.11   | 187.99 | 192.75 | 182.00 | 91.93 | 3.12 | 3.11 | 3.39                        | 206Pb/238U concordant scans | 36 | 47 |
| 12484a1 | 4   | 538  | 145  | 3.70 | 0.09661 | 0.01009 | 0.01440 | 0.00045 | 0.04867 | 0.00509 | 0.12  | 93.64  | 9.37  | 9.32  | 92.15 | 2.86 | 2.86   | 131.80 | 255.41 | 236.94 | 92.15 | 2.86 | 2.86 | 3.11                        | 206Pb/238U concordant scans | 2  | 48 |
| 12484a1 | 70  | 624  | 138  | 4.52 | 0.09995 | 0.00753 | 0.01440 | 0.00050 | 0.05034 | 0.00387 | 0.15  | 96.73  | 6.96  | 6.94  | 92.17 | 3.16 | 3.16   | 210.59 | 183.29 | 173.53 | 92.17 | 3.16 | 3.16 | 3.43                        | 206Pb/238U concordant scans | 40 | 47 |
| 12484a1 | 79  | 1168 | 293  | 3.98 | 0.10034 | 0.00842 | 0.01441 | 0.00040 | 0.05049 | 0.00423 | 0.14  | 97.09  | 7.79  | 7.76  | 92.26 | 2.54 | 2.54   | 217.62 | 199.83 | 188.28 | 92.26 | 2.54 | 2.54 | 2.75                        | 206Pb/238U concordant scans | 31 | 48 |
| 12484a1 | 119 | 627  | 101  | 6.20 | 0.09723 | 0.00626 | 0.01442 | 0.00042 | 0.04892 | 0.00325 | 0.11  | 94.21  | 5.80  | 5.79  | 92.26 | 2.68 | 2.68   | 143.92 | 159.86 | 152.42 | 92.26 | 2.68 | 2.68 | 2.91                        | 206Pb/238U concordant scans | 36 | 48 |
| 12484a1 | 66  | 763  | 205  | 3.73 | 0.10150 | 0.00754 | 0.01443 | 0.00041 | 0.05102 | 0.00383 | 0.12  | 98.16  | 6.96  | 6.94  | 92.35 | 2.59 | 2.59   | 241.55 | 177.86 | 168.64 | 92.35 | 2.59 | 2.59 | 2.81                        | 206Pb/238U concordant scans | 42 | 47 |
| 12484a1 | 45  | 777  | 208  | 3.74 | 0.09899 | 0.00645 | 0.01448 | 0.00046 | 0.04960 | 0.00319 | 0.24  | 95.84  | 5.97  | 5.95  | 92.64 | 2.92 | 2.92   | 176.15 | 153.65 | 146.75 | 92.64 | 2.92 | 2.92 | 3.15                        | 206Pb/238U concordant scans | 40 | 48 |
| 12484a1 | 25  | 706  | 165  | 4.29 | 0.09926 | 0.00595 | 0.01449 | 0.00044 | 0.04968 | 0.00299 | 0.20  | 96.09  | 5.50  | 5.49  | 92.73 | 2.80 | 2.79   | 180.26 | 143.50 | 137.46 | 92.73 | 2.80 | 2.79 | 3.01                        | 206Pb/238U concordant scans | 0  | 48 |
| 12484a1 | 77  | 573  | 99   | 5.78 | 0.09815 | 0.00658 | 0.01450 | 0.00041 | 0.04908 | 0.00327 | 0.19  | 95.07  | 6.10  | 6.08  | 92.83 | 2.59 | 2.59   | 151.48 | 159.96 | 152.50 | 92.83 | 2.59 | 2.59 | 2.79                        | 206Pb/238U concordant scans | 36 | 47 |
| 12484a1 | 67  | 692  | 119  | 5.83 | 0.09637 | 0.00626 | 0.01451 | 0.00052 | 0.04818 | 0.00312 | 0.25  | 93.42  | 5.80  | 5.79  | 92.84 | 3.28 | 3.28   | 108.06 | 156.75 | 149.60 | 92.84 | 3.28 | 3.28 | 3.54                        | 206Pb/238U concordant scans | 0  | 48 |
| 12484a1 | 91  | 535  | 123  | 4.36 | 0.09847 | 0.00713 | 0.01451 | 0.00057 | 0.04923 | 0.00360 | 0.23  | 95.36  | 6.60  | 6.58  | 92.85 | 3.65 | 3.64   | 158.62 | 175.86 | 166.88 | 92.85 | 3.65 | 3.64 | 3.93                        | 206Pb/238U concordant scans | 34 | 47 |
| 12484a1 | 108 | 935  | 271  | 3.45 | 0.09579 | 0.00695 | 0.01453 | 0.00052 | 0.04782 | 0.00338 | 0.28  | 92.88  | 6.45  | 6.43  | 92.98 | 3.32 | 3.32   | 90.24  | 171.67 | 163.15 | 92.98 | 3.32 | 3.32 | 3.57                        | 206Pb/238U concordant scans | 36 | 48 |
| 12484a1 | 64  | 571  | 147  | 3.88 | 0.10014 | 0.00870 | 0.01453 | 0.00050 | 0.04998 | 0.00430 | 0.21  | 96.91  | 8.05  | 8.02  | 93.01 | 3.17 | 3.16   | 193.93 | 206.26 | 193.99 | 93.01 | 3.17 | 3.16 | 3.40                        | 206Pb/238U concordant scans | 5  | 48 |
| 12484a1 | 94  | 495  | 135  | 3.67 | 0.10095 | 0.00699 | 0.01454 | 0.00047 | 0.05036 | 0.00341 | 0.26  | 97.66  | 6.46  | 6.44  | 93.06 | 2.98 | 2.97   | 211.42 | 160.59 | 153.05 | 93.06 | 2.98 | 2.97 | 3.20                        | 206Pb/238U concordant scans | 41 | 48 |
| 12484a1 | 43  | 554  | 101  | 5.49 | 0.09748 | 0.00590 | 0.01454 | 0.00043 | 0.04862 | 0.00300 | 0.16  | 94.44  | 5.47  | 5.45  | 93.06 | 2.74 | 2.74   | 129.44 | 148.35 | 141.93 | 93.06 | 2.74 | 2.74 | 2.95                        | 206Pb/238U concordant scans | 38 | 48 |
| 12484a1 | 73  | 491  | 127  | 3.88 | 0.09920 | 0.00812 | 0.01456 | 0.00044 | 0.04942 | 0.00413 | 0.09  | 96.04  | 7.51  | 7.49  | 93.17 | 2.81 | 2.81   | 167.86 | 201.02 | 189.37 | 93.17 | 2.81 | 2.81 | 3.02                        | 206Pb/238U concordant scans | 31 | 48 |
| 12484a1 | 84  | 484  | 85   | 5.68 | 0.09928 | 0.00731 | 0.01459 | 0.00047 | 0.04935 | 0.00370 | 0.14  | 96.11  | 6.77  | 6.74  | 93.39 | 2.95 | 2.96   | 164.30 | 180.03 | 170.63 | 93.39 | 2.95 | 2.96 | 3.16                        | 206Pb/238U concordant scans | 36 | 48 |
| 12484a1 | 120 | 527  | 118  | 4.46 | 0.09606 | 0.00832 | 0.01460 | 0.00058 | 0.04772 | 0.00407 | 0.25  | 93.13  | 7.72  | 7.69  | 93.44 | 3.68 | 3.68   | 85.34  | 170.68 | 196.46 | 93.44 | 3.68 | 3.68 | 3.94                        | 206Pb/238U concordant scans | 37 | 48 |
| 12484a1 | 74  | 531  | 110  | 4.81 | 0.09962 | 0.00721 | 0.01460 | 0.00047 | 0.04948 | 0.00348 | 0.26  | 96.43  | 6.66  | 6.64  | 93.45 | 2.98 | 2.98   | 170.71 | 168.64 | 160.37 | 93.45 | 2.98 | 2.98 | 3.19                        | 206Pb/238U concordant scans | 36 | 48 |
| 12484a1 | 44  | 778  | 187  | 4.15 | 0.09991 | 0.00631 | 0.01461 | 0.00047 | 0.04960 | 0.00308 | 0.25  | 96.69  | 5.83  | 5.82  | 93.50 | 2.98 | 2.98   | 176.06 | 148.26 | 141.83 | 93.50 | 2.98 | 2.98 | 3.18                        | 206Pb/238U concordant scans | 41 | 48 |
| 12484a1 | 100 | 648  | 166  | 3.90 | 0.09812 | 0.01024 | 0.01461 | 0.00042 | 0.04870 | 0.00511 | 0.09  | 95.04  | 9.49  | 9.45  | 93.51 | 2.64 | 2.64   | 133.58 | 256.42 | 237.80 | 93.51 | 2.64 | 2.64 | 2.82                        | 206Pb/238U concordant scans | 29 | 48 |
| 12484a1 | 31  | 873  | 264  | 3.31 | 0.09926 | 0.00577 | 0.01461 | 0.00039 | 0.04927 | 0.00278 | 0.26  | 96.10  | 5.33  | 5.32  | 93.52 | 2.50 | 2.50   | 160.47 | 134.93 | 129.59 | 93.52 | 2.50 | 2.50 | 2.67                        | 206Pb/238U concordant scans | 39 | 48 |
| 12484a1 | 40  | 720  | 134  | 5.38 | 0.10161 | 0.00813 | 0.01461 | 0.00046 | 0.05043 | 0.00400 | 0.19  | 98.27  | 7.51  | 7.48  | 93.53 | 2.94 | 2.94   | 214.83 | 180.15 | 178.77 | 93.53 | 2.94 | 2.94 | 3.14                        | 206Pb/238U concordant scans | 32 | 47 |
| 12484a1 | 62  | 590  | 107  | 5.54 | 0.10106 | 0.00783 | 0.01463 | 0.00036 | 0.05011 | 0.00385 | 0.15  | 97.76  | 7.24  | 7.21  | 93.62 | 2.29 | 2.29   | 199.91 | 183.74 | 173.93 | 93.62 | 2.29 | 2.29 | 2.45                        | 206Pb/238U concordant scans | 38 | 48 |
| 12484a1 | 95  | 494  | 98   | 5.03 | 0.09685 | 0.00738 | 0.01463 | 0.00046 | 0.05081 | 0.00368 | 0.16  | 93.86  | 6.85  | 6.82  | 93.63 | 2.93 | 2.93   | 99.65  | 186.68 | 176.64 | 93.63 | 2.93 | 2.93 | 3.13                        | 206Pb/238U concordant scans | 28 | 48 |
| 12484a1 | 68  | 532  | 137  | 3.89 | 0.10278 | 0.01197 | 0.01463 | 0.00043 | 0.05094 | 0.00595 | 0.09  | 99.34  | 11.05 | 10.99 | 93.65 | 2.73 | 2.73   | 237.97 | 201.00 | 258.65 | 93.65 | 2.73 | 2.73 | 2.91                        | 206Pb/238U concordant scans | 0  | 47 |
| 12484a1 | 78  | 928  | 163  | 5.69 | 0.09919 | 0.00619 | 0.01464 | 0.00056 | 0.04945 | 0.00287 | 0.39  | 96.03  | 5.72  | 5.71  | 93.67 | 3.57 | 3.56   | 154.84 | 139.67 | 133.95 | 93.67 | 3.57 | 3.56 | 3.81                        | 206Pb/238U concordant scans | 31 | 48 |
| 12484a1 | 75  | 369  | 37   | 9.95 | 0.11000 | 0.01743 | 0.01465 | 0.00057 | 0.05461 | 0.00869 | 0.08  | 105.97 | 16.01 | 15.88 | 93.75 | 3.60 | 3.60   | 390.07 | 379.39 | 339.38 | 93.75 | 3.60 | 3.60 | 3.84                        | 206Pb/238U concordant scans | 3  | 48 |
| 12484a1 | 102 | 535  | 145  | 3.70 | 0.10158 | 0.00906 | 0.01466 | 0.00049 | 0.05024 | 0.00458 | 0.10  | 98.23  | 8.36  | 8.33  | 93.84 | 3.10 | 3.10   | 206.01 | 218.39 | 204.67 | 93.84 | 3.10 | 3.10 | 3.30                        | 206Pb/238U concordant scans | 38 | 48 |
| 12484a1 | 118 | 390  | 65   | 6.02 | 0.10352 | 0.00955 | 0.01467 | 0.00059 | 0.05118 | 0.00484 | 0.14  | 100.02 | 8.81  | 8.77  | 93.89 | 3.74 | 3.74   | 248.86 | 225.22 | 210.63 | 93.89 | 3.74 | 3.74 | 3.99                        | 206Pb/238U concordant scans | 25 | 47 |
| 12484a1 | 39  | 783  | 216  | 3.62 | 0.09783 | 0.00617 | 0.01467 | 0.00042 | 0.04835 | 0.00307 | 0.16  | 94.77  | 5.72  | 5.70  | 93.91 | 2.66 | 2.66   | 116.57 | 153.32 | 146.47 | 93.91 | 2.66 | 2.66 | 2.83                        | 206Pb/238U concordant scans | 39 | 47 |
| 12484a1 | 69  | 729  | 205  | 3.56 | 0.10330 | 0.00569 | 0.01470 | 0.00042 | 0.05096 | 0.00286 | 0.17  | 99.81  | 5.25  | 5.23  | 94.09 | 2.66 | 2.66   | 238.90 | 132.05 | 126.90 | 94.09 | 2.66 | 2.66 | 2.83                        | 206Pb/238U concordant scans | 27 | 48 |
| 12484a1 | 59  | 827  | 119  | 6.96 | 0.10240 | 0.00537 | 0.01471 | 0.00039 | 0.05050 | 0.00260 | 0.24  | 98.99  | 4.95  | 4.94  | 94.12 | 2.51 | 2.51   | 217.92 | 121.54 | 117.17 | 94.12 | 2.51 | 2.51 | 2.66                        | 206Pb/238U concordant scans | 33 | 48 |
| 12484a1 | 83  | 778  | 209  | 3.72 | 0.09959 | 0.00611 | 0.01471 | 0.00039 | 0.04909 | 0.00304 | 0.15  | 96.40  | 5.65  | 5.63  | 94.16 | 2.50 | 2.49   | 152.10 | 148.46 | 142.01 | 94.16 | 2.50 | 2.49 | 2.65                        | 206Pb/238U concordant scans | 38 | 47 |
| 12484a1 | 11  | 586  | 150  | 3.92 | 0.09696 | 0.00788 | 0.01473 | 0.00074 | 0.04775 | 0.00401 | 0.23  | 93.97  | 7.30  | 7.28  | 94.25 | 4.68 | 4.68   | 86.81  | 173.63 | 193.29 | 94.25 | 4.68 | 4.68 | 4.96                        | 206Pb/238U concordant scans | 15 | 48 |
| 12484a1 | 10  | 835  | 179  | 4.67 | 0.09884 | 0.00662 | 0.01473 | 0.00050 | 0.04866 | 0.00327 | 0.21  | 95.71  | 6.13  | 6.11  | 94.27 | 3.17 | 3.17   | 131.59 | 161.85 | 154.23 | 94.27 | 3.17 | 3.17 | 3.36                        | 206Pb/238U concordant scans | 35 | 47 |
| 12484a1 | 105 | 443  | 84   | 5.27 | 0.11299 | 0.01021 | 0.01473 | 0.00061 | 0.05562 | 0.00515 | 0.15  | 108.70 | 9.33  | 9.29  | 94.29 | 3.85 | 3.85   | 437.10 | 213.04 | 199.77 | 94.29 | 3.85 | 3.85 | 4.08                        | 206Pb/238U concordant scans | 0  | 48 |
| 12484a1 | 58  | 503  | 85</ |      |         |         |         |         |         |         |       |        |       |       |       |      |        |        |        |        |       |      |      |                             |                             |    |    |

|         |     |     |     |      |          |           |          |          |          |          |      |         |         |         |         |         |         |         |         |         |         |        |        |        |                              |    |    |    |    |
|---------|-----|-----|-----|------|----------|-----------|----------|----------|----------|----------|------|---------|---------|---------|---------|---------|---------|---------|---------|---------|---------|--------|--------|--------|------------------------------|----|----|----|----|
| 12484a1 | 41  | 366 | 83  | 4.43 | 0.01094  | 0.01035   | 0.01512  | 0.00054  | 0.04890  | 0.00501  | 0.13 | 98.57   | 9.56    | 9.51    | 96.74   | 3.44    | 3.44    | 142.99  | 249.44  | 231.78  | 96.74   | 3.44   | 3.44   | 3.56   | 206Pb/238U concordant scans  | 0  | 48 |    |    |
| 12484a1 | 109 | 417 | 107 | 3.90 | 0.010429 | 0.00920   | 0.01517  | 0.00050  | 0.04987  | 0.00452  | 0.08 | 100.73  | 8.48    | 8.44    | 97.04   | 3.15    | 3.15    | 188.85  | 217.94  | 204.29  | 97.04   | 3.15   | 3.15   | 3.25   | 206Pb/238U concordant scans  | 31 | 47 |    |    |
| 12484a1 | 55  | 325 | 72  | 4.48 | 0.000000 | 0.000000  | 0.000000 | 0.000000 | 0.000000 | 0.000000 | 0.00 | 0.00    | 0.00    | 0.00    | 0.00    | 0.00    | 0.00    | 0.00    | 0.00    | 0.00    | 97.29   | 21.54  | 24.43  | 22.14  | Pbc-corrected isotopic sums  |    |    | 37 | 48 |
| 12484a1 | 20  | 410 | 83  | 4.92 | 0.10458  | 0.00869   | 0.01526  | 0.00060  | 0.04971  | 0.00415  | 0.20 | 101.00  | 8.00    | 7.97    | 97.63   | 3.82    | 3.82    | 181.29  | 200.73  | 189.11  | 97.63   | 3.82   | 3.82   | 3.92   | 206Pb/238U concordant scans  | 41 | 47 |    |    |
| 12484a1 | 24  | 438 | 98  | 4.45 | 0.10391  | 0.00830   | 0.01526  | 0.00058  | 0.04938  | 0.00400  | 0.18 | 100.38  | 7.65    | 7.62    | 97.65   | 3.70    | 3.70    | 165.68  | 194.88  | 183.91  | 97.65   | 3.70   | 3.70   | 3.79   | 206Pb/238U concordant scans  | 0  | 47 |    |    |
| 12484a1 | 101 | 500 | 95  | 5.25 | 0.10337  | 0.00663   | 0.01526  | 0.00048  | 0.04912  | 0.00323  | 0.15 | 99.88   | 6.11    | 6.09    | 97.65   | 3.05    | 3.05    | 153.56  | 157.78  | 150.52  | 97.65   | 3.05   | 3.05   | 3.13   | 206Pb/238U concordant scans  | 32 | 47 |    |    |
| 12484a1 | 86  | 446 | 90  | 4.95 | 0.10669  | 0.00794   | 0.01529  | 0.00059  | 0.05061  | 0.00390  | 0.16 | 102.93  | 7.93    | 7.27    | 97.81   | 3.74    | 3.74    | 223.28  | 183.44  | 173.66  | 97.81   | 3.74   | 3.74   | 3.82   | 206Pb/238U concordant scans  | 42 | 48 |    |    |
| 12484a1 | 7   | 526 | 79  | 6.69 | 0.10920  | 0.01082   | 0.01542  | 0.00053  | 0.05136  | 0.00500  | 0.20 | 105.24  | 9.93    | 9.88    | 98.66   | 3.36    | 3.36    | 256.89  | 232.01  | 216.54  | 98.66   | 3.36   | 3.36   | 3.41   | 206Pb/238U concordant scans  | 35 | 47 |    |    |
| 12484a1 | 63  | 712 | 174 | 4.09 | 0.11965  | 0.02786   | 0.01549  | 0.00135  | 0.05604  | 0.01327  | 0.13 | 114.76  | 25.42   | 25.11   | 99.06   | 8.55    | 8.54    | 453.97  | 573.86  | 486.64  | 99.06   | 8.55   | 8.54   | 8.63   | 206Pb/238U concordant scans  | 29 | 48 |    |    |
| 12484a1 | 23  | 276 | 47  | 5.81 | 0.10764  | 0.00899   | 0.01550  | 0.00061  | 0.05037  | 0.00436  | 0.12 | 103.80  | 8.26    | 8.22    | 99.15   | 3.88    | 3.88    | 212.03  | 207.23  | 194.84  | 99.15   | 3.88   | 3.88   | 3.92   | 206Pb/238U concordant scans  | 30 | 48 |    |    |
| 12484a1 | 29  | 11  | 18  | 0.60 | 0.39542  | 0.98190   | 0.01694  | 0.01229  | 0.16926  | 0.43088  | 0.06 | 338.32  | 676.64  | 612.19  | 108.31  | 78.17   | 77.69   | 2550.38 | 5100.75 | 2599.93 | 108.31  | 78.17  | 77.69  | 72.17  | 206Pb/238U concordant scans  |    |    | 35 | 47 |
| 12484a1 | 103 | 822 | 214 | 3.84 | 0.12440  | 0.00923   | 0.01752  | 0.00061  | 0.05151  | 0.00384  | 0.20 | 119.06  | 8.35    | 8.32    | 111.94  | 3.84    | 3.84    | 263.76  | 175.67  | 166.65  | 111.94  | 3.84   | 3.84   | 3.43   | 206Pb/238U concordant scans  | 37 | 48 |    |    |
| 12484a1 | 56  | 2   | 0   | 9.67 | 0.000000 | 0.000000  | 0.000000 | 0.000000 | 0.000000 | 0.000000 | 0.00 | 0.00    | 0.00    | 0.00    | 0.00    | 0.00    | 0.00    | 0.00    | 0.00    | 0.00    | 124.12  | 124.12 | 680.04 | 100.00 | Pbc-corrected isotopic sums  |    |    | 42 | 47 |
| 12484a1 | 35  | 844 | 231 | 3.66 | 0.13898  | 0.00820   | 0.01965  | 0.00062  | 0.05129  | 0.00287  | 0.34 | 132.13  | 7.33    | 7.30    | 125.45  | 3.91    | 3.91    | 254.08  | 131.09  | 126.00  | 125.45  | 3.91   | 3.91   | 3.12   | 206Pb/238U concordant scans  | 37 | 48 |    |    |
| 12484a1 | 110 | 612 | 92  | 6.62 | 0.21155  | 0.01451   | 0.02861  | 0.00090  | 0.05362  | 0.00369  | 0.19 | 194.85  | 12.20   | 12.12   | 181.87  | 5.65    | 5.65    | 355.13  | 159.13  | 151.65  | 181.87  | 5.65   | 5.65   | 3.11   | 206Pb/238U concordant scans  | 0  | 48 |    |    |
| 12484a1 | 46  | 502 | 148 | 3.39 | 0.38820  | 0.01862   | 0.05378  | 0.00171  | 0.05235  | 0.00243  | 0.34 | 333.06  | 13.67   | 13.57   | 337.69  | 10.44   | 10.44   | 300.81  | 107.49  | 104.03  | 337.69  | 10.44  | 10.44  | 3.09   | 206Pb/238U concordant scans  | 41 | 47 |    |    |
| 12484a1 | 114 | 371 | 144 | 2.57 | 0.49765  | 0.02261   | 0.06656  | 0.00157  | 0.05423  | 0.00236  | 0.30 | 410.11  | 15.39   | 15.27   | 415.39  | 9.47    | 9.46    | 380.54  | 99.43   | 96.46   | 415.39  | 9.47   | 9.46   | 2.28   | 206Pb/238U concordant scans  | 42 | 48 |    |    |
| 12484a1 | 37  | 225 | 79  | 2.84 | 1.75647  | 0.06944   | 0.16901  | 0.00479  | 0.07537  | 0.00263  | 0.48 | 1029.55 | 25.74   | 25.42   | 1006.66 | 26.47   | 26.41   | 1078.50 | 70.82   | 69.23   | 1029.55 | 25.74  | 25.42  | 2.50   | 207Pb/235U concordant scans  | 30 | 48 |    |    |
| 12484a1 | 107 | 75  | 39  | 1.93 | 1.84349  | 0.08689   | 0.18028  | 0.00532  | 0.07380  | 0.00331  | 0.36 | 1057.85 | 31.37   | 30.89   | 1068.50 | 29.10   | 29.04   | 1035.95 | 91.93   | 89.27   | 1068.50 | 29.10  | 29.04  | 2.72   | 206Pb/238U concordant scans  | 42 | 48 |    |    |
| 12484a1 | 80  | 216 | 92  | 2.36 | 3.80883  | 0.11782   | 0.24378  | 0.00599  | 0.09166  | 0.00328  | 0.37 | 1427.93 | 29.53   | 29.11   | 1406.30 | 31.07   | 31.00   | 1460.33 | 68.73   | 67.20   | 1427.93 | 29.53  | 29.11  | 2.07   | 207Pb/235U concordant scans  | 32 | 48 |    |    |
| 12484a1 | 2   | 1   | 1   | 0.69 | 36.52351 | 136.96980 | 0.31484  | 1.16720  | 0.84136  | 0.74672  | 0.97 | 3680.73 | 7361.46 | 2109.05 | 1764.47 | 3528.95 | 4735.77 | 4560.00 | 833.09  | 0.00    | 4560.00 | 833.09 | 0.00   | 18.27  | 207Pb/206Pb concordant scans |    |    | 30 | 48 |

Sample: Teknika River

|          |     |      |      |      |         |         |         |         |         |         |      |        |       |       |        |      |      |        |        |        |        |      |      |      |                             |        |        |   |   |
|----------|-----|------|------|------|---------|---------|---------|---------|---------|---------|------|--------|-------|-------|--------|------|------|--------|--------|--------|--------|------|------|------|-----------------------------|--------|--------|---|---|
| 02430AZ1 | 14  | 0    | 0    | 0.00 | 0.00000 | 0.00000 | 0.00000 | 0.00000 | 0.00000 | 0.00000 | 0.00 | 0.00   | 0.00  | 0.00  | 0.00   | 0.00 | 0.00 | 0.00   | 0.00   | 0.00   | 0.00   | 0.00 | 0.00 | 0.00 | 0.00                        | failed | 0      | 0 |   |
| 02430AZ1 | 36  | 0    | 0    | 0.00 | 0.00000 | 0.00000 | 0.00000 | 0.00000 | 0.00000 | 0.00000 | 0.00 | 0.00   | 0.00  | 0.00  | 0.00   | 0.00 | 0.00 | 0.00   | 0.00   | 0.00   | 0.00   | 0.00 | 0.00 | 0.00 | 0.00                        | 0.00   | failed | 0 | 0 |
| 02430AZ1 | 50  | 0    | 0    | 0.00 | 0.00000 | 0.00000 | 0.00000 | 0.00000 | 0.00000 | 0.00000 | 0.00 | 0.00   | 0.00  | 0.00  | 0.00   | 0.00 | 0.00 | 0.00   | 0.00   | 0.00   | 0.00   | 0.00 | 0.00 | 0.00 | 0.00                        | 0.00   | failed | 0 | 0 |
| 02430AZ1 | 58  | 0    | 0    | 0.00 | 0.00000 | 0.00000 | 0.00000 | 0.00000 | 0.00000 | 0.00000 | 0.00 | 0.00   | 0.00  | 0.00  | 0.00   | 0.00 | 0.00 | 0.00   | 0.00   | 0.00   | 0.00   | 0.00 | 0.00 | 0.00 | 0.00                        | 0.00   | failed | 0 | 0 |
| 02430AZ1 | 67  | 731  | 238  | 3.07 | 0.05777 | 0.00682 | 0.00845 | 0.00031 | 0.04959 | 0.00593 | 0.09 | 57.02  | 6.56  | 6.54  | 54.23  | 1.95 | 1.95 | 175.78 | 291.68 | 267.76 | 54.23  | 1.95 | 1.95 | 3.59 | 206Pb/238U concordant scans | 51     | 177    |   |   |
| 02430AZ1 | 94  | 248  | 95   | 2.60 | 0.05844 | 0.00983 | 0.00859 | 0.00032 | 0.04935 | 0.00846 | 0.01 | 57.67  | 9.46  | 9.41  | 55.13  | 2.05 | 2.05 | 164.36 | 328.72 | 377.92 | 55.13  | 2.05 | 2.05 | 3.72 | 206Pb/238U concordant scans | 66     | 177    |   |   |
| 02430AZ1 | 42  | 2392 | 544  | 4.40 | 0.05627 | 0.00265 | 0.00860 | 0.00021 | 0.04745 | 0.00224 | 0.20 | 55.59  | 2.55  | 2.55  | 55.20  | 1.35 | 1.35 | 72.05  | 114.00 | 110.18 | 55.20  | 1.35 | 1.35 | 2.44 | 206Pb/238U concordant scans | 68     | 174    |   |   |
| 02430AZ1 | 51  | 387  | 130  | 2.97 | 0.05948 | 0.00656 | 0.00867 | 0.00027 | 0.04976 | 0.00563 | 0.02 | 58.67  | 6.30  | 6.28  | 55.65  | 1.73 | 1.73 | 183.96 | 274.93 | 253.57 | 55.65  | 1.73 | 1.73 | 3.11 | 206Pb/238U concordant scans | 88     | 173    |   |   |
| 02430AZ1 | 22  | 413  | 134  | 3.08 | 0.05839 | 0.00799 | 0.00870 | 0.00031 | 0.04865 | 0.00679 | 0.02 | 57.63  | 7.68  | 7.65  | 55.87  | 1.96 | 1.96 | 131.22 | 262.44 | 312.61 | 55.87  | 1.96 | 1.96 | 3.51 | 206Pb/238U concordant scans | 59     | 174    |   |   |
| 02430AZ1 | 2   | 160  | 45   | 3.54 | 0.06131 | 0.01189 | 0.00873 | 0.00035 | 0.05096 | 0.01005 | 0.01 | 60.42  | 11.40 | 11.34 | 56.01  | 2.26 | 2.26 | 239.05 | 478.09 | 425.40 | 56.01  | 2.26 | 2.26 | 4.04 | 206Pb/238U concordant scans | 71     | 177    |   |   |
| 02430AZ1 | 76  | 677  | 271  | 2.50 | 0.05952 | 0.00653 | 0.00879 | 0.00023 | 0.04914 | 0.00545 | 0.04 | 58.71  | 6.27  | 6.25  | 56.39  | 1.48 | 1.48 | 154.37 | 270.81 | 250.10 | 56.39  | 1.48 | 1.48 | 2.63 | 206Pb/238U concordant scans | 59     | 177    |   |   |
| 02430AZ1 | 77  | 169  | 53   | 3.20 | 0.06190 | 0.01207 | 0.00881 | 0.00037 | 0.05098 | 0.01014 | 0.01 | 60.98  | 11.58 | 11.51 | 56.52  | 2.37 | 2.37 | 239.95 | 479.89 | 428.70 | 56.52  | 2.37 | 2.37 | 4.20 | 206Pb/238U concordant scans | 67     | 177    |   |   |
| 02430AZ1 | 90  | 545  | 161  | 3.38 | 0.05976 | 0.00493 | 0.00881 | 0.00023 | 0.04920 | 0.00419 | 0.01 | 58.93  | 4.73  | 4.72  | 56.54  | 1.44 | 1.44 | 157.14 | 205.46 | 193.31 | 56.54  | 1.44 | 1.44 | 2.55 | 206Pb/238U concordant scans | 103    | 177    |   |   |
| 02430AZ1 | 15  | 413  | 124  | 3.34 | 0.06162 | 0.00682 | 0.00883 | 0.00027 | 0.05062 | 0.00572 | 0.02 | 60.71  | 6.53  | 6.51  | 56.66  | 1.73 | 1.73 | 223.76 | 272.15 | 251.15 | 56.66  | 1.73 | 1.73 | 3.05 | 206Pb/238U concordant scans | 78     | 172    |   |   |
| 02430AZ1 | 100 | 165  | 42   | 3.97 | 0.06403 | 0.01316 | 0.00887 | 0.00032 | 0.05238 | 0.01089 | 0.01 | 63.02  | 12.59 | 12.52 | 56.90  | 2.07 | 2.07 | 301.98 | 512.46 | 442.38 | 56.90  | 2.07 | 2.07 | 3.64 | 206Pb/238U concordant scans | 70     | 176    |   |   |
| 02430AZ1 | 13  | 2347 | 519  | 4.52 | 0.05873 | 0.00258 | 0.00887 | 0.00022 | 0.04800 | 0.00210 | 0.22 | 57.95  | 2.48  | 2.48  | 56.95  | 1.43 | 1.43 | 99.48  | 105.38 | 102.11 | 56.95  | 1.43 | 1.43 | 2.51 | 206Pb/238U concordant scans | 87     | 177    |   |   |
| 02430AZ1 | 8   | 1097 | 311  | 3.52 | 0.05951 | 0.00390 | 0.00889 | 0.00024 | 0.04854 | 0.00328 | 0.06 | 58.69  | 3.74  | 3.73  | 57.07  | 1.54 | 1.54 | 125.69 | 162.83 | 155.12 | 57.07  | 1.54 | 1.54 | 2.69 | 206Pb/238U concordant scans | 71     | 176    |   |   |
| 02430AZ1 | 74  | 215  | 56   | 3.83 | 0.06052 | 0.00948 | 0.00889 | 0.00031 | 0.04935 | 0.00788 | 0.01 | 59.67  | 9.10  | 9.06  | 57.08  | 2.01 | 2.01 | 164.59 | 329.17 | 353.40 | 57.08  | 2.01 | 2.01 | 3.52 | 206Pb/238U concordant scans | 81     | 177    |   |   |
| 02430AZ1 | 28  | 601  | 226  | 2.66 | 0.05913 | 0.00607 | 0.00890 | 0.00025 | 0.04821 | 0.00504 | 0.02 | 58.33  | 5.83  | 5.81  | 57.10  | 1.59 | 1.59 | 109.45 | 218.90 | 238.10 | 57.10  | 1.59 | 1.59 | 2.79 | 206Pb/238U concordant scans | 71     | 176    |   |   |
| 02430AZ1 | 56  | 483  | 132  | 3.65 | 0.06327 | 0.00877 | 0.00890 | 0.00038 | 0.05156 | 0.00730 | 0.07 | 62.29  | 8.39  | 8.35  | 57.11  | 2.44 | 2.44 | 266.13 | 342.43 | 309.74 | 57.11  | 2.44 | 2.44 | 4.27 | 206Pb/238U concordant scans | 47     | 177    |   |   |
| 02430AZ1 | 31  | 121  | 33   | 3.68 | 0.06553 | 0.01632 | 0.00892 | 0.00047 | 0.05326 | 0.01351 | 0.01 | 64.45  | 15.61 | 15.49 | 57.27  | 2.99 | 2.99 | 339.76 | 631.92 | 528.39 | 57.27  | 2.99 | 2.99 | 5.22 | 206Pb/238U concordant scans | 64     | 175    |   |   |
| 02430AZ1 | 48  | 417  | 171  | 2.44 | 0.06522 | 0.01138 | 0.00895 | 0.00036 | 0.05283 | 0.00932 | 0.05 | 64.16  | 10.87 | 10.81 | 57.46  | 2.32 | 2.32 | 321.61 | 427.76 | 377.76 | 57.46  | 2.32 | 2.32 | 4.03 | 206Pb/238U concordant scans | 57     | 177    |   |   |
| 02430AZ1 | 79  | 135  | 41   | 3.34 | 0.06556 | 0.01580 | 0.00896 | 0.00044 | 0.05306 | 0.01301 | 0.01 | 64.48  | 15.11 | 15.00 | 57.51  | 2.82 | 2.82 | 331.31 | 609.99 | 513.02 | 57.51  | 2.82 | 2.82 | 4.90 | 206Pb/238U concordant scans | 66     | 176    |   |   |
| 02430AZ1 | 11  | 219  | 85   | 2.58 | 0.06115 | 0.01142 | 0.00898 | 0.00039 | 0.04940 | 0.00940 | 0.01 | 60.27  | 10.96 | 10.90 | 57.62  | 2.47 | 2.47 | 166.68 | 333.37 | 416.91 | 57.62  | 2.47 | 2.47 | 4.29 | 206Pb/238U concordant scans | 64     | 174    |   |   |
| 02430AZ1 | 57  | 455  | 122  | 3.72 | 0.06209 | 0.00755 | 0.00898 | 0.00029 | 0.05014 | 0.00618 | 0.06 | 61.16  | 7.23  | 7.20  | 57.64  | 1.86 | 1.86 | 201.26 | 299.58 | 274.36 | 57.64  | 1.86 | 1.86 | 3.23 | 206Pb/238U concordant scans | 94     | 177    |   |   |
| 02430AZ1 | 25  | 278  | 96   | 2.90 | 0.06319 | 0.00908 | 0.00911 | 0.00037 | 0.05032 | 0.00744 | 0.01 | 62.21  | 8.69  | 8.65  | 58.44  | 2.34 | 2.34 | 209.88 | 362.04 | 325.82 | 58.44  | 2.34 | 2.34 | 4.01 | 206Pb/238U concordant scans | 62     | 174    |   |   |
| 02430AZ1 | 108 | 118  | 31   | 3.82 | 0.06479 | 0.01695 | 0.00922 | 0.00044 | 0.05097 | 0.01351 | 0.01 | 63.74  | 16.22 | 16.09 | 59.16  | 2.78 | 2.78 | 239.29 | 478.59 | 559.69 | 59.16  | 2.78 | 2.78 | 4.71 | 206Pb/238U concordant scans | 57     | 177    |   |   |
| 02430AZ1 | 29  | 2688 | 1103 | 2.44 | 0.06452 | 0.00317 | 0.00953 | 0.00024 | 0.04908 | 0.00243 | 0.17 | 63.49  | 3.02  | 3.02  | 61.17  | 1.55 | 1.55 | 151.69 | 118.23 | 114.11 | 61.17  | 1.55 | 1.55 | 2.53 | 206Pb/238U concordant scans | 66     | 176    |   |   |
| 02430AZ1 | 27  | 134  | 41   | 3.25 | 0.07071 | 0.01635 | 0.01003 | 0.00044 | 0.05113 | 0.01199 | 0.01 | 69.38  | 15.57 | 15.45 | 64.34  | 2.80 | 2.80 | 246.80 | 493.59 | 499.14 | 64.34  | 2.80 | 2.80 | 4.35 | 206Pb/238U concordant scans | 87     | 175    |   |   |
| 02430AZ1 | 86  | 1068 | 323  | 3.31 | 0.07995 | 0.00493 | 0.01168 | 0.00025 | 0.04966 | 0.00312 | 0.07 | 78.10  | 4.65  | 4.63  | 74.84  | 1.59 | 1.60 | 178.88 | 149.63 | 143.08 | 74.84  | 1.59 | 1.60 | 2.13 | 206Pb/238U concordant scans | 85     | 177    |   |   |
| 02430AZ1 | 40  | 485  | 63   | 7.64 | 0.09164 | 0.00787 | 0.01320 | 0.00035 | 0.05035 | 0.00443 | 0.02 | 89.03  | 7.33  | 7.31  | 84.53  | 2.23 | 2.23 | 211.31 | 210.49 | 197.71 | 84.53  | 2.23 | 2.23 | 2.64 | 206Pb/238U concordant scans | 77     | 175    |   |   |
| 02430AZ1 | 5   | 190  | 98   | 1.94 | 0.17522 | 0.01621 | 0.02563 | 0.00064 | 0.04958 | 0.00465 | 0.03 | 163.94 | 14.05 | 13.96 | 163.17 | 4.02 | 4.02 | 175.12 | 226.30 | 216.54 | 163.17 | 4.02 | 4.02 | 2.47 | 206Pb/238U concordant scans | 99     | 174    |   |   |
| 02430AZ1 | 33  | 341  | 198  | 1.72 | 0.17957 | 0.01479 | 0.02767 | 0.00067 | 0.05179 | 0.00394 | 0.05 | 183.07 | 12.58 | 12.50 | 175.93 | 4.20 | 4.20 | 276.30 | 178.89 | 161.64 | 175.93 | 4.20 | 4.20 | 2.39 | 206Pb/238U concordant scans | 81     | 174    |   |   |
| 02430AZ1 | 65  | 107  | 72   | 1.50 | 0.20360 | 0.02620 | 0.02822 | 0.00087 | 0.05232 | 0.00686 | 0.02 | 188.17 | 22.22 | 21.98 | 179.42 | 5.47 | 5.47 | 299.43 | 313.58 | 285.89 | 179.42 | 5.47 | 5.47 | 3.05 | 206Pb/238U concordant scans | 74     | 177    |   |   |
| 02430AZ1 | 52  | 705  | 375  | 1.88 | 0.20561 | 0.01077 | 0.02969 | 0.00071 | 0.05023 | 0.00264 | 0.16 | 189.86 | 9.10  | 9.05  | 188.59 | 4.44 | 4.44 | 205.69 | 124.40 | 119.82 | 188.59 | 4.44 | 4.44 | 2.35 | 206Pb/238U concordant scans | 92     | 176    |   |   |
| 02430AZ1 | 9   | 310  | 146  | 2.13 | 0.21072 | 0.01419 | 0.03030 | 0.00084 | 0.05045 | 0.00352 | 0.04 | 194.16 | 11.94 | 11.87 | 192.40 | 5.24 | 5.24 | 215.67 | 165.90 | 157.86 | 192.40 | 5.24 | 5.24 | 2.73 | 206Pb/238U concordant scans | 78     | 172    |   |   |
| 02430AZ1 | 82  | 75   | 36   | 2.08 | 0.23537 | 0.04201 | 0.03208 | 0.00132 | 0.05322 | 0.00970 | 0.01 | 214.62 | 34.82 | 34.24 | 203.53 | 8.25 | 8.25 | 338.10 | 441.53 | 388.41 | 203.53 | 8.25 | 8.25 | 4.06 | 206Pb/238U concordant scans | 63     | 177    |   |   |
| 02430AZ1 | 41  | 369  | 186  | 1.98 | 0.24634 | 0.01208 | 0.03448 | 0.00075 | 0.05182 | 0.00260 | 0.06 | 223.60 | 9.87  | 9.82  | 218.51 | 4.65 | 4.65 | 277.50 | 117.12 | 113.04 | 218.51 | 4.65 | 4.65 | 2.13 | 206Pb/238U concordant scans | 106    | 175    |   |   |
| 02430AZ1 | 12  | 1042 | 695  | 1.50 | 0.39992 | 0.01242 | 0.05314 | 0.00108 | 0.05459 | 0.00173 | 0.10 | 341.59 | 9.03  | 8.99  | 333.75 | 6.64 | 6.63 | 395.29 | 71.98  | 70.41  | 333.75 | 6.64 | 6.63 | 1.99 | 206Pb/238U concordant scans | 115    | 174    |   |   |
| 02430AZ1 | 24  | 892  | 1415 | 0.63 | 0.42059 | 0.01245 | 0.05615 | 0.01113 | 0.05433 | 0.00163 | 0.15 | 356.48 | 8.92  | 8.88  | 352.14 | 6.89 | 6.89 | 384.78 | 67.91  | 66.50  | 352.14 | 6.89 | 6.89 | 1.96 | 206Pb/238U concordant scans | 139    | 174    |   |   |
| 02430AZ1 | 34  | 107  | 41   | 2.59 | 0.49990 | 0.03318 | 0.06390 | 0.00160 | 0.05674 | 0.00386 | 0.05 | 411.63 | 22.59 | 22.34 | 399.30 | 9.67 | 9.67 | 481.37 | 154.10 | 147.02 | 399.30 | 9.67 | 9.67 | 1.42 | 206Pb/238U concordant scans | 111    | 175    |   |   |
| 02430AZ1 | 85  | 192  | 36   | 5.32 | 0.47643 | 0.02422 | 0.06403 | 0.00126 | 0.05396 | 0.00281 | 0.04 | 395.62 | 16.73 | 16.59 | 400.12 | 7.62 | 7.61 | 369.43 | 119.56 | 115.29 | 400.12 | 7.62 | 7.61 | 2.90 | 206Pb/238U concordant scans | 126    | 177    |   |   |
| 02430AZ1 | 97  | 269  | 142  | 1.89 | 0.49332 | 0.02283 | 0.06519 | 0.00119 | 0.05489 | 0.00257 | 0.07 | 407.17 | 15.58 | 15.46 | 407.10 | 7.19 | 7.19 | 407.55 | 106.72 | 103.29 | 407.10 | 7.19 | 7.19 | 1.77 | 206Pb/238U concordant scans | 102</  |        |   |   |

|          |     |     |     |       |         |         |         |         |         |         |      |         |        |        |         |       |       |         |        |        |         |       |       |      |                             |     |     |
|----------|-----|-----|-----|-------|---------|---------|---------|---------|---------|---------|------|---------|--------|--------|---------|-------|-------|---------|--------|--------|---------|-------|-------|------|-----------------------------|-----|-----|
| 02430AZ1 | 70  | 119 | 107 | 1.11  | 0.58417 | 0.03774 | 0.07469 | 0.00155 | 0.05673 | 0.00371 | 0.05 | 467.14  | 24.33  | 24.05  | 464.35  | 9.29  | 9.28  | 480.87  | 148.04 | 141.49 | 464.35  | 9.29  | 9.28  | 2.00 | 206Pb/238U concordant scans | 108 | 177 |
| 02430AZ1 | 69  | 214 | 187 | 1.14  | 0.58030 | 0.02679 | 0.07486 | 0.00144 | 0.05622 | 0.00264 | 0.06 | 464.66  | 17.29  | 17.14  | 465.38  | 8.64  | 8.63  | 461.08  | 105.73 | 102.36 | 465.38  | 8.64  | 8.63  | 1.86 | 206Pb/238U concordant scans | 128 | 177 |
| 02430AZ1 | 83  | 308 | 80  | 3.86  | 0.70333 | 0.02886 | 0.08515 | 0.00165 | 0.05991 | 0.00250 | 0.10 | 540.78  | 17.28  | 17.13  | 526.80  | 9.83  | 9.82  | 600.16  | 91.83  | 89.25  | 526.80  | 9.83  | 9.82  | 1.87 | 206Pb/238U concordant scans | 93  | 177 |
| 02430AZ1 | 44  | 271 | 174 | 1.56  | 0.69519 | 0.02463 | 0.08647 | 0.00180 | 0.05831 | 0.00210 | 0.13 | 535.91  | 14.81  | 14.70  | 534.65  | 10.67 | 10.66 | 541.31  | 79.78  | 77.83  | 534.65  | 10.67 | 10.66 | 2.00 | 206Pb/238U concordant scans | 123 | 174 |
| 02430AZ1 | 59  | 192 | 63  | 3.02  | 0.70335 | 0.03519 | 0.08765 | 0.00212 | 0.05820 | 0.00298 | 0.12 | 540.79  | 21.09  | 20.87  | 541.61  | 12.55 | 12.54 | 537.35  | 113.99 | 110.06 | 541.61  | 12.55 | 12.54 | 2.32 | 206Pb/238U concordant scans | 108 | 177 |
| 02430AZ1 | 95  | 323 | 74  | 4.37  | 0.78796 | 0.02838 | 0.09497 | 0.00168 | 0.06017 | 0.00219 | 0.12 | 590.01  | 16.18  | 16.05  | 584.89  | 9.90  | 9.89  | 609.76  | 79.62  | 77.67  | 584.89  | 9.90  | 9.89  | 1.69 | 206Pb/238U concordant scans | 111 | 177 |
| 02430AZ1 | 30  | 791 | 96  | 8.23  | 0.86009 | 0.05716 | 0.09594 | 0.00387 | 0.06502 | 0.00425 | 0.31 | 630.17  | 31.44  | 30.96  | 590.58  | 22.79 | 22.75 | 774.94  | 140.68 | 134.65 | 590.58  | 22.79 | 22.75 | 3.86 | 206Pb/238U concordant scans | 10  | 174 |
| 02430AZ1 | 103 | 436 | 151 | 2.89  | 0.83268 | 0.02914 | 0.10021 | 0.00166 | 0.06026 | 0.00214 | 0.08 | 615.10  | 16.21  | 16.08  | 615.65  | 9.72  | 9.71  | 613.04  | 77.50  | 75.66  | 615.65  | 9.72  | 9.71  | 1.58 | 206Pb/238U concordant scans | 127 | 177 |
| 02430AZ1 | 93  | 322 | 104 | 3.10  | 0.83999 | 0.02468 | 0.10057 | 0.00177 | 0.06058 | 0.00179 | 0.16 | 619.14  | 13.67  | 13.58  | 617.73  | 10.35 | 10.34 | 624.28  | 64.37  | 63.09  | 617.73  | 10.35 | 10.34 | 1.67 | 206Pb/238U concordant scans | 128 | 177 |
| 02430AZ1 | 91  | 203 | 358 | 0.57  | 0.84205 | 0.03217 | 0.10073 | 0.00194 | 0.06063 | 0.00236 | 0.12 | 620.28  | 17.81  | 17.66  | 618.71  | 11.35 | 11.34 | 625.99  | 84.89  | 82.68  | 618.71  | 11.35 | 11.34 | 1.84 | 206Pb/238U concordant scans | 113 | 177 |
| 02430AZ1 | 102 | 588 | 105 | 5.62  | 1.09247 | 0.02932 | 0.12050 | 0.00195 | 0.06575 | 0.00178 | 0.13 | 749.70  | 14.28  | 14.18  | 733.45  | 11.21 | 11.21 | 798.52  | 57.23  | 56.21  | 733.45  | 11.21 | 11.21 | 1.53 | 206Pb/238U concordant scans | 119 | 177 |
| 02430AZ1 | 99  | 93  | 8   | 11.55 | 1.09798 | 0.05475 | 0.12407 | 0.00222 | 0.06418 | 0.00324 | 0.06 | 752.37  | 26.67  | 26.33  | 753.94  | 12.74 | 12.73 | 747.73  | 108.55 | 104.93 | 753.94  | 12.74 | 12.73 | 1.69 | 206Pb/238U concordant scans | 129 | 177 |
| 02430AZ1 | 107 | 127 | 139 | 0.92  | 1.12466 | 0.04658 | 0.12505 | 0.00236 | 0.06523 | 0.00275 | 0.10 | 765.20  | 22.38  | 22.14  | 759.57  | 13.54 | 13.52 | 781.69  | 89.86  | 87.36  | 759.57  | 13.54 | 13.52 | 1.78 | 206Pb/238U concordant scans | 124 | 177 |
| 02430AZ1 | 66  | 86  | 115 | 0.75  | 1.17256 | 0.06571 | 0.12889 | 0.00289 | 0.06598 | 0.00377 | 0.08 | 787.84  | 30.94  | 30.48  | 781.51  | 16.51 | 16.49 | 805.81  | 121.90 | 117.34 | 781.51  | 16.51 | 16.49 | 2.11 | 206Pb/238U concordant scans | 103 | 177 |
| 02430AZ1 | 63  | 253 | 34  | 7.41  | 1.38267 | 0.26329 | 0.13410 | 0.01013 | 0.07478 | 0.01434 | 0.16 | 881.58  | 115.42 | 109.21 | 811.22  | 57.73 | 57.47 | 1062.59 | 412.01 | 363.50 | 811.22  | 57.73 | 57.47 | 7.12 | 206Pb/238U concordant scans | 3   | 177 |
| 02430AZ1 | 110 | 449 | 94  | 4.77  | 1.45493 | 0.03981 | 0.15134 | 0.00277 | 0.06973 | 0.00192 | 0.21 | 911.91  | 16.53  | 16.40  | 908.46  | 15.49 | 15.48 | 920.27  | 57.11  | 56.08  | 908.46  | 15.49 | 15.48 | 1.71 | 206Pb/238U concordant scans | 151 | 177 |
| 02430AZ1 | 4   | 369 | 157 | 2.35  | 1.55538 | 0.04087 | 0.16028 | 0.00331 | 0.07038 | 0.00188 | 0.16 | 952.63  | 16.31  | 16.18  | 958.34  | 18.42 | 18.39 | 939.47  | 55.31  | 54.35  | 952.63  | 16.31 | 16.18 | 1.71 | 206Pb/238U concordant scans | 137 | 175 |
| 02430AZ1 | 81  | 59  | 33  | 1.77  | 1.57396 | 0.08653 | 0.16019 | 0.00344 | 0.07126 | 0.00402 | 0.05 | 959.99  | 34.42  | 33.85  | 957.84  | 19.15 | 19.12 | 964.92  | 117.48 | 113.20 | 957.84  | 19.15 | 19.12 | 2.00 | 206Pb/238U concordant scans | 118 | 177 |
| 02430AZ1 | 26  | 232 | 109 | 2.13  | 1.59507 | 0.04722 | 0.16066 | 0.00323 | 0.07201 | 0.00216 | 0.15 | 968.28  | 18.56  | 18.39  | 960.42  | 17.92 | 17.90 | 986.18  | 61.64  | 60.44  | 960.42  | 17.92 | 17.90 | 1.87 | 206Pb/238U concordant scans | 141 | 174 |
| 02430AZ1 | 106 | 32  | 10  | 3.08  | 1.54104 | 0.12684 | 0.16066 | 0.00420 | 0.06957 | 0.00584 | 0.06 | 946.92  | 51.33  | 50.06  | 960.45  | 23.35 | 23.30 | 915.60  | 177.73 | 168.14 | 960.45  | 23.35 | 23.30 | 2.43 | 206Pb/238U concordant scans | 103 | 177 |
| 02430AZ1 | 84  | 90  | 60  | 1.51  | 1.67794 | 0.08406 | 0.16239 | 0.00365 | 0.07494 | 0.00380 | 0.14 | 1000.20 | 32.13  | 31.63  | 970.07  | 20.26 | 20.22 | 1066.85 | 103.53 | 100.18 | 970.07  | 20.26 | 20.22 | 2.09 | 206Pb/238U concordant scans | 98  | 177 |
| 02430AZ1 | 88  | 235 | 104 | 2.27  | 1.69442 | 0.06334 | 0.16244 | 0.00348 | 0.07565 | 0.00284 | 0.21 | 1006.43 | 24.01  | 23.73  | 970.32  | 19.31 | 19.28 | 1085.91 | 76.22  | 74.38  | 970.32  | 19.31 | 19.28 | 1.99 | 206Pb/238U concordant scans | 64  | 177 |
| 02430AZ1 | 80  | 241 | 147 | 1.64  | 1.63993 | 0.04740 | 0.16348 | 0.00297 | 0.07275 | 0.00215 | 0.12 | 985.68  | 18.32  | 18.15  | 976.11  | 16.48 | 16.46 | 1007.06 | 60.55  | 59.39  | 976.11  | 16.48 | 16.46 | 1.69 | 206Pb/238U concordant scans | 112 | 177 |
| 02430AZ1 | 10  | 94  | 22  | 4.31  | 1.68048 | 0.06623 | 0.16923 | 0.00367 | 0.07202 | 0.00293 | 0.07 | 1001.16 | 25.24  | 24.93  | 1007.89 | 20.27 | 20.24 | 986.45  | 83.89  | 81.68  | 1007.89 | 20.27 | 20.24 | 2.01 | 206Pb/238U concordant scans | 125 | 173 |
| 02430AZ1 | 19  | 248 | 71  | 3.48  | 1.71603 | 0.05031 | 0.16917 | 0.00343 | 0.07357 | 0.00221 | 0.11 | 1014.54 | 18.89  | 18.72  | 1007.54 | 18.91 | 18.88 | 1029.68 | 61.37  | 60.18  | 1014.54 | 18.89 | 18.72 | 1.86 | 207Pb/235U concordant scans | 141 | 174 |
| 02430AZ1 | 89  | 267 | 29  | 9.09  | 1.86778 | 0.04991 | 0.17848 | 0.00300 | 0.07590 | 0.00206 | 0.11 | 1069.75 | 17.75  | 17.60  | 1058.66 | 16.41 | 16.39 | 1092.42 | 54.97  | 54.01  | 1058.66 | 16.41 | 16.39 | 1.55 | 207Pb/235U concordant scans | 125 | 177 |
| 02430AZ1 | 43  | 263 | 44  | 6.03  | 1.88916 | 0.05063 | 0.17861 | 0.00341 | 0.07671 | 0.00208 | 0.15 | 1077.29 | 17.87  | 17.72  | 1059.35 | 18.69 | 18.66 | 1113.76 | 54.58  | 53.63  | 1077.29 | 17.87 | 17.72 | 1.66 | 207Pb/235U concordant scans | 137 | 174 |
| 02430AZ1 | 1   | 121 | 47  | 2.59  | 1.95509 | 0.06532 | 0.18655 | 0.00390 | 0.07601 | 0.00258 | 0.13 | 1100.20 | 22.57  | 22.32  | 1102.66 | 21.20 | 21.17 | 1095.34 | 68.66  | 67.17  | 1102.66 | 21.20 | 21.17 | 1.92 | 206Pb/238U concordant scans | 139 | 177 |
| 02430AZ1 | 7   | 140 | 55  | 2.53  | 1.99940 | 0.06377 | 0.18844 | 0.00385 | 0.07695 | 0.00251 | 0.10 | 1115.31 | 21.71  | 21.48  | 1112.94 | 20.92 | 20.89 | 1119.93 | 65.65  | 64.28  | 1112.94 | 20.92 | 20.89 | 1.88 | 206Pb/238U concordant scans | 132 | 174 |
| 02430AZ1 | 60  | 156 | 21  | 7.36  | 2.02606 | 0.06479 | 0.18852 | 0.00414 | 0.07795 | 0.00258 | 0.17 | 1124.30 | 21.86  | 21.62  | 1113.35 | 22.46 | 22.42 | 1145.51 | 66.49  | 65.08  | 1124.30 | 21.86 | 21.62 | 1.94 | 207Pb/235U concordant scans | 135 | 177 |
| 02430AZ1 | 20  | 476 | 202 | 2.36  | 2.12991 | 0.05446 | 0.19485 | 0.00387 | 0.07928 | 0.00205 | 0.16 | 1158.56 | 17.75  | 17.59  | 1147.62 | 20.88 | 20.85 | 1179.07 | 51.46  | 50.61  | 1158.56 | 17.75 | 17.59 | 1.53 | 207Pb/235U concordant scans | 145 | 174 |
| 02430AZ1 | 6   | 324 | 344 | 0.94  | 2.54304 | 0.14991 | 0.20043 | 0.00702 | 0.09202 | 0.00535 | 0.28 | 1284.44 | 43.42  | 42.51  | 1177.64 | 37.75 | 37.64 | 1467.82 | 112.55 | 108.51 | 1177.64 | 37.75 | 37.64 | 3.21 | 206Pb/238U concordant scans | 13  | 176 |
| 02430AZ1 | 37  | 429 | 139 | 3.09  | 2.34781 | 0.06101 | 0.20127 | 0.00401 | 0.08460 | 0.00223 | 0.17 | 1226.90 | 18.59  | 18.42  | 1182.16 | 21.54 | 21.50 | 1306.41 | 51.69  | 50.82  | 1226.90 | 18.59 | 18.42 | 1.52 | 207Pb/235U concordant scans | 106 | 176 |
| 02430AZ1 | 101 | 149 | 36  | 4.11  | 2.67086 | 0.07429 | 0.22592 | 0.00379 | 0.08574 | 0.00241 | 0.14 | 1320.43 | 20.65  | 20.44  | 1313.08 | 19.97 | 19.94 | 1332.38 | 54.92  | 53.95  | 1313.08 | 19.97 | 19.94 | 1.52 | 206Pb/238U concordant scans | 126 | 177 |
| 02430AZ1 | 104 | 176 | 67  | 2.61  | 2.71195 | 0.07300 | 0.22799 | 0.00387 | 0.08627 | 0.00239 | 0.11 | 1331.73 | 20.07  | 19.87  | 1323.94 | 20.33 | 20.30 | 1344.29 | 53.91  | 52.97  | 1331.73 | 20.07 | 19.87 | 1.51 | 207Pb/235U concordant scans | 136 | 177 |
| 02430AZ1 | 32  | 301 | 94  | 3.20  | 3.17858 | 0.07761 | 0.25003 | 0.00484 | 0.09220 | 0.00231 | 0.12 | 1451.97 | 18.95  | 18.77  | 1438.64 | 25.01 | 24.96 | 1471.53 | 47.99  | 47.24  | 1451.97 | 18.95 | 18.77 | 1.30 | 207Pb/235U concordant scans | 151 | 175 |
| 02430AZ1 | 47  | 161 | 175 | 0.92  | 3.18587 | 0.10363 | 0.24307 | 0.00524 | 0.09506 | 0.00319 | 0.15 | 1453.74 | 25.29  | 24.98  | 1402.65 | 27.21 | 27.15 | 1529.23 | 63.81  | 62.48  | 1453.74 | 25.29 | 24.98 | 1.74 | 207Pb/235U concordant scans | 72  | 175 |
| 02430AZ1 | 68  | 111 | 113 | 0.98  | 3.60763 | 0.10410 | 0.26963 | 0.00507 | 0.09704 | 0.00288 | 0.12 | 1551.21 | 23.07  | 22.81  | 1538.93 | 25.78 | 25.73 | 1567.99 | 56.03  | 55.01  | 1551.21 | 23.07 | 22.81 | 1.49 | 207Pb/235U concordant scans | 145 | 177 |
| 02430AZ1 | 17  | 83  | 55  | 1.51  | 3.66532 | 0.11789 | 0.27389 | 0.00580 | 0.09706 | 0.00320 | 0.13 | 1563.85 | 25.82  | 25.50  | 1560.51 | 29.40 | 29.34 | 1568.35 | 62.32  | 61.05  | 1563.85 | 25.82 | 25.50 | 1.65 | 207Pb/235U concordant scans | 124 | 175 |
| 02430AZ1 | 78  | 89  | 89  | 1.00  | 3.87752 | 0.11618 | 0.28162 | 0.00528 | 0.09886 | 0.00305 | 0.13 | 1609.01 | 24.33  | 24.04  | 1599.50 | 26.61 | 26.55 | 1621.49 | 57.39  | 56.31  | 1609.01 | 24.33 | 24.04 | 1.51 | 207Pb/235U concordant scans | 121 | 177 |
| 02430AZ1 | 23  | 202 | 183 | 1.10  | 3.91617 | 0.09767 | 0.28134 | 0.00557 | 0.10096 | 0.00263 | 0.09 | 1617.03 | 20.27  | 20.07  | 1598.09 | 28.06 | 28.00 | 1641.76 | 48.65  | 47.87  | 1617.03 | 20.27 | 20.07 | 1.25 | 207Pb/235U concordant scans | 147 | 174 |
| 02430AZ1 | 35  | 171 | 54  | 3.18  | 4.00549 | 0.17364 | 0.27204 | 0.00813 | 0.10679 | 0.00468 | 0.27 | 1635.   |        |        |         |       |       |         |        |        |         |       |       |      |                             |     |     |
