# Supplementary material
Source: publisher figshare collection journal article supplement (https://gsapubs.figshare.com/ndownloader/files/22411650)
Supplement: Supplementary file 1 [file 22411650 › Supp Item L - Geochemical data.pdf]

**Supplemental Item L. Geochemical data for lavas in the Colorado Creek Basin and dikes along the Denali fault, Alaska Range.**

| Rock Unit:      |                                | Colorado Creek volcanic rocks |           |           |           |           | Dikes along the Denali fault |          |          |          |          |          |          |
|-----------------|--------------------------------|-------------------------------|-----------|-----------|-----------|-----------|------------------------------|----------|----------|----------|----------|----------|----------|
| Sample:         |                                | 062411JT3                     | 062411JT4 | 062411JT5 | 062411JT6 | 062411JT7 | JB10MUD                      | JB09MUD  | JB15AMUD | JBAUG    | O2PETER  | Z5PETER  | O2BAL    |
| Latitude (°N):  |                                | 63.29566                      | 63.31253  | 63.31346  | 63.31445  | 63.31595  | 63.2092                      | 63.2054  | 63.2436  | 63.4349  | 63.1677  | 63.2056  | 63.6169  |
| Longitude (°W): |                                | 149.7302                      | 149.73018 | 149.72993 | 149.73033 | 149.73285 | 150.8382                     | 150.8519 | 150.6471 | 145.9843 | 151.1632 | 150.9151 | 146.8887 |
| Geochem Lab     | Analytical Method <sup>#</sup> | ALS                           | ALS       | ALS       | ALS       | ALS       | ACT                          | ACT      | ACT      | ACT      | ALS      | ALS      | ALS      |
| SiO2            | XRF                            | 79.2                          | 49.4      | 57.3      | 53.5      | 57.2      | 55.07                        | 52.84    | 60.8     | 67.57    | 45.7     | 49.4     | 55       |
| TiO2            | XRF                            | 0.11                          | 1.56      | 0.89      | 1.03      | 0.89      | 1.918                        | 0.619    | 0.749    | 0.375    | 2.71     | 2.24     | 1.27     |
| Al2O3           | XRF                            | 13                            | 13.6      | 13.6      | 15.85     | 16.9      | 14.79                        | 14.47    | 17.54    | 15.49    | 14.95    | 14.65    | 16.75    |
| Fe2O3           | XRF                            | 0.23                          | 8.92      | 5.52      | 7.74      | 4.01      | 12.5                         | 7.03     | 5.55     | 3.31     | 13.75    | 12.85    | 8.09     |
| MnO             | XRF                            | <0.01                         | 0.13      | 0.12      | 0.12      | 0.05      | 0.225                        | 0.146    | 0.106    | 0.072    | 0.25     | 0.21     | 0.1      |
| MgO             | XRF                            | 0.07                          | 5.41      | 4.76      | 2.08      | 2.33      | 2.35                         | 8.14     | 2.54     | 1.06     | 4.27     | 3.98     | 4.06     |
| CaO             | XRF                            | 0.08                          | 7.24      | 4.75      | 8.33      | 4.47      | 6.07                         | 8.55     | 6.32     | 3.6      | 9.13     | 7.57     | 4.83     |
| Na2O            | XRF                            | 2.64                          | 1.28      | 1.52      | 2.36      | 3.11      | 4.51                         | 2.95     | 3.78     | 3.68     | 2.55     | 2.99     | 2.96     |
| K2O             | XRF                            | 4.87                          | 2.91      | 4.31      | 2.19      | 6.17      | 1.24                         | 2.18     | 1.21     | 2.08     | 0.8      | 0.77     | 3.33     |
| P2O5            | XRF                            | 0.02                          | 0.79      | 0.49      | 0.37      | 0.55      | 0.86                         | 0.15     | 0.24     | 0.19     | 0.92     | 0.46     | 0.4      |
| LOI             |                                | 1.35                          | 8.64      | 7.29      | 6.32      | 3.72      | 1.31                         | 2.14     | 0.93     | 0.64     | 3.56     | 4.59     | 1.87     |
| Total           |                                | 101.64                        | 100.11    | 100.82    | 100.1     | 99.71     | 100.8                        | 99.22    | 99.77    | 98.08    | 95.03    | 95.12    | 96.79    |
| Sc              | ICP-MSa                        | 3                             | 20        | 16        | 17        | 11        | 28                           | 25       | 11       | 7        | 26       | 30       | 15       |
| V               | ICP-MSa                        | 8                             | 166       | 141       | 114       | 100       | 104                          | 168      | 95       | 56       | 182      | 250      | 142      |
| Cr              | ICP-MSa                        | 10                            | 330       | 310       | 150       | 170       | < 20                         | 430      | 20       | < 20     | 40       | 10       | 100      |
| Co              | ICP-MSa                        | <1                            | 26        | 19        | 19        | 12        | 14                           | 25       | 9        | 4        | 30       | 33       | 19       |
| Ni              | ICP-MSa                        | 4                             | 117       | 136       | 21        | 88        | < 20                         | 110      | < 20     | < 20     | 27       | 7        | 18       |
| Cu              | ICP-MSa                        | 5                             | 87        | 40        | 16        | 46        | 30                           | < 10     | < 10     | < 10     | 35       | 34       | 2        |
| Zn              | ICP-MSa                        | 14                            | 122       | 83        | 124       | 71        | 150                          | 60       | 60       | 60       | 184      | 142      | 124      |
| Ga              | ICP-MSa                        | 16.7                          | 20.2      | 16.8      | 18        | 19.8      | 22                           | 15       | 20       | 18       | 26.4     | 24.1     | 20.2     |
| Rb              | ICP-MSb                        | 177.5                         | 80.6      | 107.5     | 64.7      | 156       | 27                           | 68       | 20       | 45       | 12       | 16.6     | 101      |
| Sr              | ICP-MSb                        | 18.9                          | 322       | 249       | 493       | 600       | 410                          | 416      | 703      | 526      | 519      | 547      | 603      |
| Y               | ICP-MSb                        | 23.3                          | 39.2      | 18.6      | 21.5      | 15.9      | 38.5                         | 11.9     | 13       | 11.6     | 48.8     | 38.2     | 21.3     |
| Zr              | ICP-MSb                        | 120                           | 283       | 142       | 158       | 194       | 244                          | 58       | 97       | 126      | 298      | 218      | 194      |
| Nb              | ICP-MSa                        | 20                            | 23.9      | 11.7      | 11.8      | 15.4      | 14.8                         | 4.7      | 6.1      | 7.4      | 24.2     | 10.3     | 16.2     |
| Cs              | ICP-MSb                        | 1.39                          | 3.08      | 2.21      | 1.78      | 4.09      | 1.1                          | 0.6      | 0.9      | 1.4      | 0.62     | 0.87     | 3.71     |
| Ba              | ICP-MSb                        | 614                           | 1195      | 1705      | 1130      | 1850      | 719                          | 249      | 506      | 1099     | 517      | 468      | 970      |
| La              | ICP-MSb                        | 35.2                          | 40.2      | 24        | 28.4      | 24.1      | 22.6                         | 6.07     | 10.1     | 20.1     | 32.2     | 17.4     | 29.6     |
| Ce              | ICP-MSb                        | 69.7                          | 85.2      | 46.7      | 59.9      | 47        | 53.1                         | 13.2     | 22.5     | 38.2     | 77       | 42.7     | 60.3     |
| Pr              | ICP-MSb                        | 7.37                          | 10.55     | 5.49      | 7.4       | 5.47      | 7.14                         | 1.8      | 2.91     | 4.51     | 10.9     | 6.15     | 7.44     |
| Nd              | ICP-MSb                        | 25.5                          | 40.9      | 20.8      | 29.3      | 20.9      | 32.6                         | 8.47     | 13.1     | 17.7     | 49.7     | 28.5     | 30.2     |
| Sm              | ICP-MSb                        | 4.83                          | 9.16      | 4.4       | 6.2       | 4.26      | 7.48                         | 2.06     | 2.8      | 3.29     | 11.55    | 7.21     | 5.92     |
| Eu              | ICP-MSb                        | 0.25                          | 1.67      | 1.34      | 1.67      | 1.35      | 2.55                         | 0.721    | 1.03     | 0.763    | 3        | 2.18     | 1.64     |
| Gd              | ICP-MSb                        | 3.82                          | 8.54      | 3.71      | 5.75      | 3.82      | 7.38                         | 2.07     | 2.63     | 2.52     | 10.95    | 7.71     | 5.44     |
| Tb              | ICP-MSb                        | 0.67                          | 1.29      | 0.59      | 0.73      | 0.55      | 1.22                         | 0.33     | 0.42     | 0.37     | 1.57     | 1.2      | 0.74     |
| Ho              | ICP-MSb                        | 0.79                          | 1.5       | 0.73      | 0.84      | 0.62      | 1.36                         | 0.4      | 0.44     | 0.39     | 1.83     | 1.47     | 0.79     |
| Tm              | ICP-MSb                        | 0.33                          | 0.57      | 0.25      | 0.27      | 0.27      | 0.535                        | 0.177    | 0.185    | 0.169    | 0.72     | 0.59     | 0.33     |
| Yb              | ICP-MSb                        | 2.05                          | 3.97      | 1.77      | 1.74      | 1.84      | 3.48                         | 1.2      | 1.28     | 1.15     | 4.76     | 4.1      | 1.94     |
| Lu              | ICP-MSb                        | 0.31                          | 0.56      | 0.28      | 0.3       | 0.24      | 0.605                        | 0.2      | 0.229    | 0.206    | 0.73     | 0.6      | 0.29     |
| Hf              | ICP-MSb                        | 4.1                           | 7         | 3.8       | 4.3       | 4.8       | 5.1                          | 1.5      | 2.4      | 3.3      | 6.5      | 5.1      | 4.5      |
| Ta              | ICP-MSa                        | 1.6                           | 1.3       | 0.6       | 0.6       | 0.8       | 0.67                         | 0.18     | 0.29     | 0.45     | 1        | 0.5      | 0.9      |
| Pb              | ICP-MSa                        | 8                             | 12        | 14        | 5         | 17        | 19                           | < 5      | < 5      | 12       | 16       | 11       | 6        |
| Th              | ICP-MSa                        | 24.2                          | 11.6      | 5.77      | 5.97      | 8.25      | 3.29                         | 1.35     | 1.7      | 5.18     | 2.35     | 1.69     | 6.54     |
| U               | ICP-MSa                        | 5.22                          | 5.31      | 2.8       | 2.66      | 4.01      | 1.32                         | 0.49     | 0.64     | 2.19     | 0.94     | 1.33     | 2.39     |

<sup>#</sup> ICP-MSa = samples prepared by acid dissolution; ICP-MSb = samples prepared by lithium metaborate fusion.

\* ALS = ALS Global, Vancouver, British Columbia; ACT = Actlabs (Activation Laboratories, LTD), Ancaster, Ontario
